# Supplementary material for: Extracellular matrix-inducing Sox9 promotes both basal progenitor proliferation and gliogenesis in developing neocortex
Source: eLife journal article supplement (doi:10.7554/elife.49808), 2020-03-19

Figure 9 Supplement 1

**A**

### Proliferation

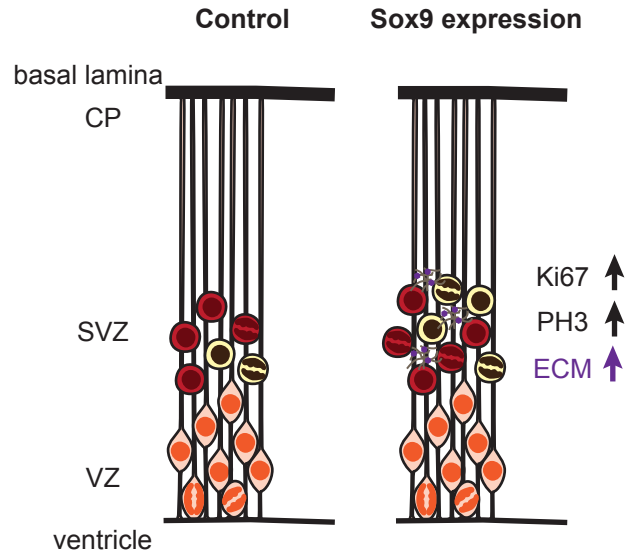

● Targeted, RFP+ BP

● Non-targeted, RFP- BP

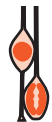

Apical progenitors

**B**

### Fate choice

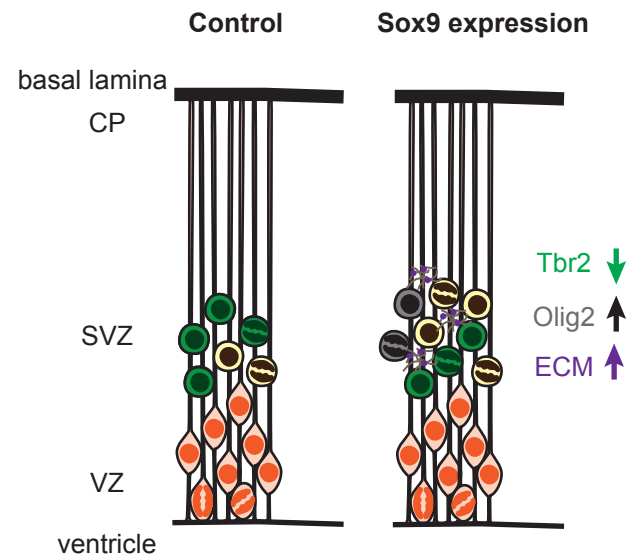

● Targeted, RFP+, Tbr2+ BP

● Targeted, RFP+, Olig2+ BP

● Non-targeted, RFP- BP

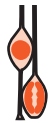

Apical progenitors

**C**

### Neuron output

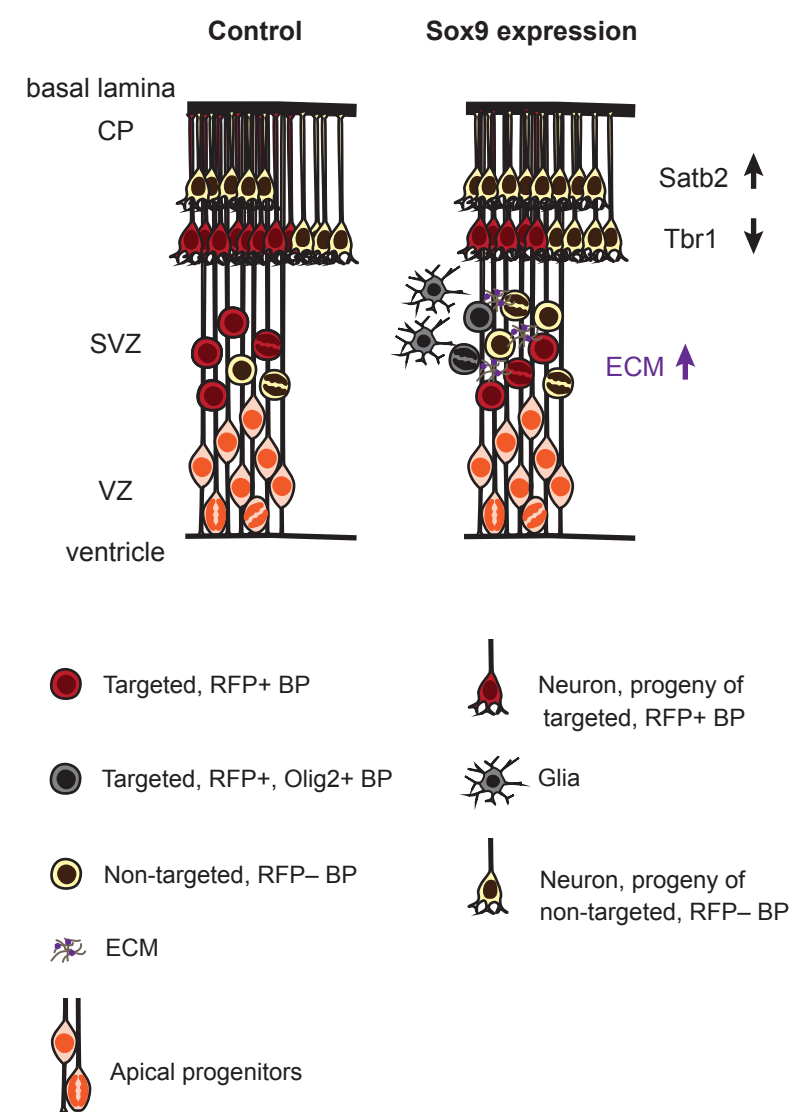

Supplement: supp [file elife-49808-supp-v1.zip]
