# Supplementary material for: Extracellular matrix-inducing Sox9 promotes both basal progenitor proliferation and gliogenesis in developing neocortex
Source: eLife. 2020 Mar 19;9:e49808. doi: 10.7554/eLife.49808 (PMC7105383; doi:10.7554/eLife.49808)
Supplement: Supplementary file 1. — Tab-1 (Sox9_up_PC): List of genes that are upregulated upon conditional Sox9 expression. Tab-2 (Sox9_down_PC): List of genes that are downregulated upon conditional Sox9 expression. Columns in each tab denote the following information consecutively: A: Ensemble gene ID, B: Gene name, C: Description, D: Average count for Sox9 sample, E: Average count for control sample, G: Logarithmic fold change (FC) of counts between Sox9 and control samples, J: p-value, K: adjusted p-value, W: Average FPKM value for control sample, X: Average FPKM value for Sox9 sample, Y: Fold change (FC) between average FPKM values of Sox9 and control samples, Z: Logarithmic fold change (FC) between average FPKM values of Sox9 and control samples. [file elife-49808-supp1.xlsx]

## Sheet: Sox9_up_PC
Ensembl gene ID	Gene name	Description	Sox9 (Avg count)	Ctrl (Avg count)	baseMean	Fold change (Avg count, Sox9/Cntrl, log2)	lfcSE	stat	p-value	p-adjusted				ctrl_high_1	ctrl_high_2	ctrl_high_4	sox9_high_1	sox9_high_2	sox9_high_3	sox9_high_4		Cntrl (Avg FPKM)	Sox9 (Avg FPKM)	Fold change (Avg FPKM, Sox9/Cntrl)	Fold change (Avg FPKM, Sox9/Cntrl, log2)
ENSMUSG00000075014	Gm10800	predicted gene 10800 [Source:MGI Symbol;Acc:MGI:3641657]	12566.9	11656.2	12046.5	1.09731	0.154989	7.07991	1.44249e-12	2.68894e-10				957.561	747.939	1340.83	3125.08	2339.84	2473.84	2592.19		1015.44	2632.74	2.5927	1.37445
ENSMUSG00000064368	mt-Nd6	mitochondrially encoded NADH dehydrogenase 6 [Source:MGI Symbol;Acc:MGI:102495]	1042.7	1015.19	1026.98	0.620961	0.166151	3.73732	0.00018599	0.00301744				117.262	170.53	190.042	306.115	258.855	262.349	351.024		159.278	294.586	1.84951	0.887141
ENSMUSG00000064367	mt-Nd5	mitochondrially encoded NADH dehydrogenase 5 [Source:MGI Symbol;Acc:MGI:102496]	3353.51	3061.05	3186.39	0.509384	0.151597	3.36012	0.000779083	0.00854791				119.696	168.022	152.038	265.471	225.197	237.58	286.218		146.585	253.617	1.73016	0.790908
ENSMUSG00000075015	Gm10801	predicted gene 10801 [Source:MGI Symbol;Acc:MGI:3641656]	2061.65	1879.34	1957.47	1.16145	0.150896	7.69704	1.39251e-14	3.99352e-12				64.501	48.649	80.508	205.277	153	171.728	179.502		64.5527	177.377	2.74778	1.45827
ENSMUSG00000037664	Cdkn1c	cyclin-dependent kinase inhibitor 1C (P57) [Source:MGI Symbol;Acc:MGI:104564]	860.412	741.091	792.228	1.83501	0.183702	9.9891	1.70127e-23	1.76185e-20				11.553	10.804	14.207	70.277	57.949	41.157	45.742		12.188	53.7812	4.41264	2.14164
ENSMUSG00000095280	Gm21738	predicted gene, 21738 [Source:MGI Symbol;Acc:MGI:5433902]	847.593	745.626	789.326	1.11641	0.170294	6.55574	5.5365e-11	7.37185e-09				16.79	11.271	19.096	48.866	36.98	45.177	40.574		15.719	42.8992	2.72913	1.44844
ENSMUSG00000095186	Gm10718	predicted gene 10718 [Source:MGI Symbol;Acc:MGI:3642028]	326.271	287.172	303.929	1.07216	0.206325	5.19644	2.03142e-07	1.0667e-05				10.275	9.46	14.471	35.911	26.805	28.742	28.927		11.402	30.0962	2.63956	1.4003
ENSMUSG00000075334	Rprm	reprimo, TP53 dependent G2 arrest mediator candidate [Source:MGI Symbol;Acc:MGI:1915124]	294.064	258.345	273.653	0.908241	0.201636	4.50435	6.65761e-06	0.000206847				21.053	9.135	10.154	48.429	21.966	19.433	28.796		13.4473	29.656	2.20534	1.141
ENSMUSG00000091028	Gm10722	predicted gene 10722 [Source:MGI Symbol;Acc:MGI:3642024]	208.837	180.327	192.546	1.12856	0.222581	5.07036	3.97073e-07	1.87864e-05				8.395	6.714	9.571	28.235	18.776	21.525	23.422		8.22667	22.9895	2.79451	1.4826
ENSMUSG00000031802	Phxr4	per-hexamer repeat gene 4 [Source:MGI Symbol;Acc:MGI:104522]	137.969	144.584	141.749	2.30032	0.284991	8.07156	6.94047e-16	2.39588e-13				1.569	1.465	6.464	23.348	12.172	14.487	31.048		3.166	20.2637	6.40043	2.67817
ENSMUSG00000030905	Crym	crystallin, mu [Source:MGI Symbol;Acc:MGI:102675]	1144.16	1013.89	1069.72	2.0818	0.470887	4.42101	9.82396e-06	0.000287938				0.225	0.01	0.158	21.657	17.573	7.279	13.425		0.131	14.9835	114.378	6.83766
ENSMUSG00000069919	Hba-a1	hemoglobin alpha, adult chain 1 [Source:MGI Symbol;Acc:MGI:96015]	92.8348	60.4105	74.3066	1.83589	0.341178	5.38102	7.40647e-08	4.43935e-06				0.181	5.279	1.803	3.302	22.129	27.798	5.919		2.421	14.787	6.10781	2.61065
ENSMUSG00000069917	Hba-a2	hemoglobin alpha, adult chain 2 [Source:MGI Symbol;Acc:MGI:96016]	70.7399	44.9761	56.0177	2.16526	0.362448	5.97399	2.31517e-09	2.12597e-07				0.213	3.161	1.181	3.152	20.218	26.889	4.746		1.51833	13.7513	9.05681	3.179
ENSMUSG00000095891	Gm10717	predicted gene 10717 [Source:MGI Symbol;Acc:MGI:3642031]	682.767	595.554	632.931	1.12014	0.178348	6.28062	3.37222e-10	3.67611e-08				4.56	3.918	6.313	15.627	11.633	13.46	12.941		4.93033	13.4153	2.72096	1.44412
ENSMUSG00000031302	Nlgn3	neuroligin 3 [Source:MGI Symbol;Acc:MGI:2444609]	2322.86	2098	2194.37	0.482509	0.138152	3.49258	0.000478377	0.00603344				7.873	7.024	5.764	13.543	13.071	11.37	9.29		6.887	11.8185	1.71606	0.779099
ENSMUSG00000046523	Kctd4	potassium channel tetramerisation domain containing 4 [Source:MGI Symbol;Acc:MGI:1914766]	597.346	577.155	585.808	2.64596	0.170011	15.5635	1.28949e-54	8.01245e-51				1.799	1.373	1.45	16.303	10.958	5.133	13.092		1.54067	11.3715	7.3809	2.8838
ENSMUSG00000074564	Gm10720	predicted gene 10720 [Source:MGI Symbol;Acc:MGI:3641687]	105.677	90.005	96.7216	1.15995	0.276394	4.19673	2.70791e-05	0.000656413				3.826	2.789	4.054	12.63	8.984	10.524	10.307		3.55633	10.6113	2.98376	1.57713
ENSMUSG00000052565	Hist1h1d	histone cluster 1, H1d [Source:MGI Symbol;Acc:MGI:107502]	56.9304	31.6864	42.5053	1.20703	0.35909	3.36137	0.000775562	0.0085193				3.368	2.92	1.929	9.692	8.831	16.613	5.776		2.739	10.228	3.73421	1.9008
ENSMUSG00000025867	Cplx2	complexin 2 [Source:MGI Symbol;Acc:MGI:104726]	830.762	887.49	863.178	0.606556	0.169617	3.57604	0.000348835	0.00488552				6.893	4.581	5.141	10.755	10.533	9.277	10.082		5.53833	10.1617	1.8348	0.875625
ENSMUSG00000052305	Hbb-bs	hemoglobin, beta adult s chain [Source:MGI Symbol;Acc:MGI:5474852]	120.594	56.5199	83.9801	1.34341	0.370245	3.62843	0.000285149	0.0041854				0.276	6.846	0.673	3.265	9.863	17.917	6.652		2.59833	9.42425	3.62704	1.85879
ENSMUSG00000091831	Gm4707	predicted gene 4707 [Source:MGI Symbol;Acc:MGI:3782887]	130.761	79.5872	101.519	1.38959	0.309236	4.49363	7.00198e-06	0.000216183				1.627	2.923	2.357	11.244	5.472	9.869	8.956		2.30233	8.88525	3.85924	1.94832
ENSMUSG00000051219	3100002H09Rik	RIKEN cDNA 3100002H09 gene [Source:MGI Symbol;Acc:MGI:1917499]	41.389	33.3709	36.8072	1.70208	0.385322	4.41728	9.995e-06	0.000291177				1.781	0.622	2.082	10.838	6.107	7.148	8.289		1.495	8.0955	5.41505	2.43697
ENSMUSG00000071860	2900055J20Rik	RIKEN cDNA 2900055J20 gene [Source:MGI Symbol;Acc:MGI:1920251]	25.3763	24.1461	24.6734	2.29402	0.447539	5.12584	2.96213e-07	1.4764e-05				0	0.644	0.662	8.519	5.269	4.57	10.637		0.435333	7.24875	16.651	4.05754
ENSMUSG00000074402	Vmn1r55	vomeronasal 1 receptor 55 [Source:MGI Symbol;Acc:MGI:3033474]	54.3215	37.6389	44.7886	1.55705	0.378442	4.11436	3.88251e-05	0.000867793				0.672	1.268	2.086	7.717	3.335	7.334	8.098		1.342	6.621	4.93368	2.30266
ENSMUSG00000027350	Chgb	chromogranin B [Source:MGI Symbol;Acc:MGI:88395]	535.308	531.281	533.007	0.927334	0.187068	4.95721	7.15135e-07	3.15896e-05				3.176	2.066	2.68	7.033	6.663	5.561	5.352		2.64067	6.15225	2.32981	1.22021
ENSMUSG00000023019	Gpd1	glycerol-3-phosphate dehydrogenase 1 (soluble) [Source:MGI Symbol;Acc:MGI:95679]	174.431	220.821	200.939	3.9198	0.264638	14.812	1.22617e-49	5.71425e-46				0.173	0.279	0.319	7.11	7.542	1.795	6.303		0.257	5.6875	22.1304	4.46795
ENSMUSG00000073940	Hbb-bt	hemoglobin, beta adult t chain [Source:MGI Symbol;Acc:MGI:5474850]	56.4774	24.0097	37.9244	2.06797	0.404213	5.11603	3.12027e-07	1.53896e-05				0.059	1.474	0.065	1.019	6.396	12.038	1.228		0.532667	5.17025	9.70635	3.27893
ENSMUSG00000064272	Gpbar1	G protein-coupled bile acid receptor 1 [Source:MGI Symbol;Acc:MGI:2653863]	44.9524	15.3419	28.0321	1.67273	0.419898	3.98365	6.78634e-05	0.0013559				0.884	0.866	0.534	8.94	4.162	6.486	1.052		0.761333	5.16	6.77758	2.76077
ENSMUSG00000056399	Prss34	protease, serine 34 [Source:MGI Symbol;Acc:MGI:2681414]	54.3484	37.9052	44.9522	2.07701	0.36914	5.62663	1.83764e-08	1.33811e-06				0.488	0.57	0.974	5.943	3.552	5.464	5.369		0.677333	5.082	7.50295	2.90746
ENSMUSG00000058537	AW822073	expressed sequence AW822073 [Source:MGI Symbol;Acc:MGI:3034577]	74.3287	24.6858	45.9613	2.6202	0.383732	6.8282	8.59864e-12	1.35837e-09				0.573	0.237	0.244	7.585	3.74	7.115	1.384		0.351333	4.956	14.1063	3.81826
ENSMUSG00000022893	Adamts1	a disintegrin-like and metallopeptidase (reprolysin type) with thrombospondin type 1 motif, 1 [Source:MGI Symbol;Acc:MGI:109249]	251.698	300.382	279.518	0.775991	0.213573	3.63338	0.000279729	0.00411232				1.747	2.17	2.388	2.827	4.69	4.962	6.47		2.10167	4.73725	2.25404	1.17252
ENSMUSG00000020027	Socs2	suppressor of cytokine signaling 2 [Source:MGI Symbol;Acc:MGI:1201787]	805.137	769.693	784.883	1.48158	0.165273	8.96447	3.11776e-19	1.66052e-16				1.557	1.079	1.205	5.266	3.479	3.322	5.26		1.28033	4.33175	3.3833	1.75843
ENSMUSG00000040759	Cmtm5	CKLF-like MARVEL transmembrane domain containing 5 [Source:MGI Symbol;Acc:MGI:2447164]	80.1958	45.2841	60.2463	1.92427	0.363004	5.30096	1.15196e-07	6.46798e-06				0.372	0.64	0.961	6.569	2.901	3.992	3.567		0.657667	4.25725	6.47326	2.69449
ENSMUSG00000095547	Gm10719	predicted gene 10719 [Source:MGI Symbol;Acc:MGI:3641690]	106.237	99.5624	102.423	0.987637	0.279718	3.53083	0.000414257	0.00547672				1.464	1.148	2.124	5.018	3.59	3.504	3.94		1.57867	4.013	2.54202	1.34597
ENSMUSG00000029373	Pf4	platelet factor 4 [Source:MGI Symbol;Acc:MGI:1888711]	20.9001	16.6764	18.4866	1.80266	0.448478	4.01951	5.83183e-05	0.00120167				0.273	0.572	0.403	3.956	2.508	3.996	5.48		0.416	3.985	9.57933	3.25992
ENSMUSG00000027489	Necab3	N-terminal EF-hand calcium binding protein 3 [Source:MGI Symbol;Acc:MGI:1861721]	389.71	349.046	366.474	0.635522	0.189849	3.34751	0.000815415	0.00886824				2.525	2.075	1.451	4.7	3.682	3.179	3.492		2.017	3.76325	1.86577	0.899768
ENSMUSG00000064039	Ccr1l1	chemokine (C-C motif) receptor 1-like 1 [Source:MGI Symbol;Acc:MGI:104617]	27.4585	24.409	25.7159	1.61494	0.429351	3.76135	0.000168998	0.00281025				0.769	0.106	0.852	4.216	2.803	3.099	3.561		0.575667	3.41975	5.9405	2.57059
ENSMUSG00000074037	Mc1r	melanocortin 1 receptor [Source:MGI Symbol;Acc:MGI:99456]	94.6302	47.1974	67.5257	1.30287	0.376225	3.463	0.000534197	0.00649574				0.522	1.534	0.499	4.207	1.726	4.032	3.54		0.851667	3.37625	3.96429	1.98706
ENSMUSG00000048284	Tas2r126	taste receptor, type 2, member 126 [Source:MGI Symbol;Acc:MGI:2681273]	18.7158	13.2662	15.6017	1.58233	0.454399	3.48225	0.000497223	0.00616272				0.372	0.25	0.72	5.167	1.945	2.499	3.89		0.447333	3.37525	7.54527	2.91557
ENSMUSG00000024173	Tpsab1	tryptase alpha/beta 1 [Source:MGI Symbol;Acc:MGI:96943]	39.8538	30.4397	34.4743	2.86238	0.413874	6.91607	4.64352e-12	8.0148e-10				0.186	0.134	0.124	3.95	1.642	2.69	4.582		0.148	3.216	21.7297	4.4416
ENSMUSG00000050553	Gk2	glycerol kinase 2 [Source:MGI Symbol;Acc:MGI:1329027]	38.6479	27.974	32.5486	1.37712	0.388029	3.549	0.000386691	0.0052477				0.643	0.66	0.865	2.874	2.024	4.358	3.606		0.722667	3.2155	4.44949	2.15364
ENSMUSG00000032987	Olfr281	olfactory receptor 281 [Source:MGI Symbol;Acc:MGI:3030115]	18.3581	15.2991	16.6101	1.71212	0.452672	3.78225	0.00015542	0.00262799				0.245	0.293	0.543	3.832	1.439	2.659	4.915		0.360333	3.21125	8.91189	3.15573
ENSMUSG00000018973	Hoxb1	homeobox B1 [Source:MGI Symbol;Acc:MGI:96182]	47.5618	27.0564	35.8444	2.77287	0.411277	6.74208	1.56135e-11	2.31728e-09				0.103	0.155	0.229	3.894	2.81	3.416	2.075		0.162333	3.04875	18.7808	4.23119
ENSMUSG00000075370	Igll1	immunoglobulin lambda-like polypeptide 1 [Source:MGI Symbol;Acc:MGI:96529]	63.1349	34.6313	46.8471	1.9495	0.372943	5.22734	1.71971e-07	9.15915e-06				0.338	0.351	0.461	3.259	1.033	3.798	3.272		0.383333	2.8405	7.41	2.88947
ENSMUSG00000078160	Gm16503	predicted gene 16503 [Source:MGI Symbol;Acc:MGI:3642127]	54.1668	45.3669	49.1383	1.4099	0.354508	3.97704	6.9777e-05	0.00138374				0.894	0.519	0.553	2.24	2.55	3.575	2.546		0.655333	2.72775	4.16239	2.05741
ENSMUSG00000089715	Cbx6	chromobox 6 [Source:MGI Symbol;Acc:MGI:3512628]	181.249	169.731	174.667	0.778406	0.225721	3.44854	0.000563632	0.00674802				1.399	0.89	1.222	2.989	2	2.469	2.7		1.17033	2.5395	2.16989	1.11762
ENSMUSG00000050558	Prokr2	prokineticin receptor 2 [Source:MGI Symbol;Acc:MGI:2181363]	681.333	595.81	632.463	1.83945	0.171288	10.7389	6.68179e-27	9.58118e-24				0.494	0.598	0.575	2.94	2.428	1.921	2.462		0.555667	2.43775	4.38707	2.13326
ENSMUSG00000025482	Odf3	outer dense fiber of sperm tails 3 [Source:MGI Symbol;Acc:MGI:1916537]	52.1903	29.5094	39.2298	1.87192	0.398848	4.69333	2.68797e-06	9.76733e-05				0.134	0.362	0.535	2.895	1.776	3.043	1.968		0.343667	2.4205	7.04316	2.81622
ENSMUSG00000069706	Taar5	trace amine-associated receptor 5 [Source:MGI Symbol;Acc:MGI:2685073]	16.3258	7.30513	11.1711	1.5916	0.469269	3.39166	0.000694712	0.00785366				0.426	0.076	0.094	3.258	1.784	3.016	1.115		0.198667	2.29325	11.5432	3.52897
ENSMUSG00000074501	Gm5612	predicted gene 5612 [Source:MGI Symbol;Acc:MGI:3647118]	17.6364	10.7265	13.6879	1.763	0.468872	3.76008	0.00016986	0.00281955				0	0.368	0.076	2.613	2.108	2.419	1.967		0.148	2.27675	15.3834	3.94331
ENSMUSG00000032060	Cryab	crystallin, alpha B [Source:MGI Symbol;Acc:MGI:88516]	51.1703	35.4845	42.207	2.33048	0.378386	6.15901	7.3201e-10	7.4986e-08				0.379	0.16	0.173	4.297	2.405	0.757	1.399		0.237333	2.2145	9.33076	3.22199
ENSMUSG00000049291	Prss38	protease, serine 38 [Source:MGI Symbol;Acc:MGI:2685095]	42.1776	25.1543	32.45	1.89661	0.408898	4.63835	3.51194e-06	0.000121911				0.144	0.233	0.48	2.611	0.987	2.658	2.495		0.285667	2.18775	7.6584	2.93704
ENSMUSG00000059448	Olfr156	olfactory receptor 156 [Source:MGI Symbol;Acc:MGI:1352683]	7.52799	11.1504	9.59797	1.62591	0.471425	3.44893	0.000562815	0.00674632				0	0.162	0.2	1.098	1.592	1.79	4.017		0.120667	2.12425	17.6043	4.13785
ENSMUSG00000073043	Atoh1	atonal bHLH transcription factor 1 [Source:MGI Symbol;Acc:MGI:104654]	33.6666	13.5694	22.1825	1.63474	0.454584	3.59613	0.000322986	0.00459601				0.163	0.146	0.451	3.68	1.839	2.421	0.533		0.253333	2.11825	8.36151	3.06376
ENSMUSG00000048349	Pou4f1	POU domain, class 4, transcription factor 1 [Source:MGI Symbol;Acc:MGI:102525]	87.4287	69.5254	77.1983	1.21741	0.327919	3.71254	0.000205192	0.00325287				0.409	0.968	0.605	2.8	1.82	1.392	2.429		0.660667	2.11025	3.19412	1.67542
ENSMUSG00000058216	BC021614	cDNA sequence BC021614 [Source:MGI Symbol;Acc:MGI:2385078]	24.1772	18.6816	21.0369	1.60316	0.431232	3.71762	0.00020111	0.00320418				0.351	0.157	0.485	2.286	1.014	2.359	2.753		0.331	2.103	6.35347	2.66755
ENSMUSG00000021647	Cartpt	CART prepropeptide [Source:MGI Symbol;Acc:MGI:1351330]	24.6625	17.4619	20.5479	3.15417	0.461233	6.83857	7.99902e-12	1.29661e-09				0	0	0	3.752	2.508	0.722	1.335		0	2.07925	#DIV/0!	#DIV/0!
ENSMUSG00000044199	S1pr4	sphingosine-1-phosphate receptor 4 [Source:MGI Symbol;Acc:MGI:1333809]	36.1305	16.1632	24.7206	1.55828	0.45398	3.43249	0.000598055	0.00707382				0.181	0.195	0.44	3.331	2.231	2.406	0.284		0.272	2.063	7.58456	2.92307
ENSMUSG00000024985	Tcf7l2	transcription factor 7 like 2, T cell specific, HMG box [Source:MGI Symbol;Acc:MGI:1202879]	2142.85	1883.95	1994.91	1.87522	0.364316	5.14723	2.64363e-07	1.34278e-05				0.209	0.41	0.388	3.121	2.393	0.778	1.705		0.335667	1.99925	5.95606	2.57436
ENSMUSG00000023764	Sfi1	Sfi1 homolog, spindle assembly associated (yeast) [Source:MGI Symbol;Acc:MGI:1926137]	817.96	619.516	704.563	1.24795	0.165653	7.53347	4.94092e-14	1.35447e-11				0.612	0.591	0.696	2.264	1.533	2.196	1.899		0.633	1.973	3.1169	1.64011
ENSMUSG00000036463	4930544G11Rik	RIKEN cDNA 4930544G11 gene [Source:MGI Symbol;Acc:MGI:1914903]	10.7542	14.3249	12.7946	1.78119	0.46867	3.80052	0.000144394	0.00246715				0.061	0	0.34	1.281	1.557	1.74	3.055		0.133667	1.90825	14.2762	3.83554
ENSMUSG00000078307	AI593442	expressed sequence AI593442 [Source:MGI Symbol;Acc:MGI:2143099]	90.8435	52.0627	68.6831	1.07952	0.318614	3.38819	0.00070355	0.00793399				0.689	0.619	0.524	3.054	1.474	1.761	1.097		0.610667	1.8465	3.02374	1.59634
ENSMUSG00000005202	Shbg	sex hormone binding globulin [Source:MGI Symbol;Acc:MGI:98295]	30.3905	24.5052	27.0275	2.0744	0.431117	4.81169	1.49663e-06	5.94853e-05				0.195	0	0.339	1.5	0.859	2.365	2.477		0.178	1.80025	10.1138	3.33825
ENSMUSG00000075046	Duxf3	double homeobox family member 3 [Source:MGI Symbol;Acc:MGI:1921649]	40.5602	9.57661	22.8553	2.14313	0.439928	4.87154	1.10729e-06	4.61768e-05				0.16	0.115	0.106	2.615	0.988	3.173	0.419		0.127	1.79875	14.1634	3.82409
ENSMUSG00000028310	Ppp3r2	protein phosphatase 3, regulatory subunit B, alpha isoform (calcineurin B, type II) [Source:MGI Symbol;Acc:MGI:107171]	41.9612	20.9435	29.9511	1.74393	0.401936	4.33882	1.43251e-05	0.000392696				0.395	0.307	0.146	2.838	1.451	1.827	1.034		0.282667	1.7875	6.3237	2.66077
ENSMUSG00000069633	Pex11g	peroxisomal biogenesis factor 11 gamma [Source:MGI Symbol;Acc:MGI:1920905]	105.757	106.197	106.009	1.32548	0.278117	4.76588	1.88027e-06	7.19713e-05				0.408	0.506	0.66	1.958	1.25	1.329	2.499		0.524667	1.759	3.3526	1.74528
ENSMUSG00000032265	Fam46a	family with sequence similarity 46, member A [Source:MGI Symbol;Acc:MGI:2670964]	67.4287	54.4428	60.0082	2.20637	0.338715	6.51393	7.32075e-11	9.41145e-09				0.275	0.213	0.207	2.823	1.253	0.778	2.092		0.231667	1.7365	7.49568	2.90606
ENSMUSG00000021257	Angel1	angel homolog 1 (Drosophila) [Source:MGI Symbol;Acc:MGI:1915987]	270.569	263.716	266.653	1.19833	0.212762	5.63225	1.77875e-08	1.3003e-06				0.725	0.504	0.589	2.057	1.971	1.398	1.462		0.606	1.722	2.84158	1.5067
ENSMUSG00000031610	Scrg1	scrapie responsive gene 1 [Source:MGI Symbol;Acc:MGI:1328308]	186.345	157.902	170.092	4.07649	0.302294	13.4852	1.91228e-41	5.0924e-38				0.036	0.082	0.053	2.791	1.734	0.53	1.741		0.057	1.699	29.807	4.89758
ENSMUSG00000054263	Lifr	leukemia inhibitory factor receptor [Source:MGI Symbol;Acc:MGI:96788]	851.085	664.565	744.502	0.836833	0.173728	4.8169	1.45804e-06	5.81997e-05				0.793	1.049	0.549	2.144	1.779	1.416	1.443		0.797	1.6955	2.12735	1.08906
ENSMUSG00000037966	Ninj1	ninjurin 1 [Source:MGI Symbol;Acc:MGI:1196617]	82.2819	83.5391	83.0003	1.42973	0.305337	4.68245	2.83464e-06	0.000102603				0.305	0.504	0.589	2.107	1.933	0.949	1.702		0.466	1.67275	3.58959	1.84382
ENSMUSG00000059555	Tor4a	torsin family 4, member A [Source:MGI Symbol;Acc:MGI:2442720]	47.4873	23.5211	33.7924	1.35903	0.388041	3.50228	0.000461291	0.00586157				0.44	0.376	0.268	2.105	0.922	2.182	1.21		0.361333	1.60475	4.44119	2.15095
ENSMUSG00000066278	Vps37b	vacuolar protein sorting 37B (yeast) [Source:MGI Symbol;Acc:MGI:1916724]	269.295	284.486	277.975	0.838709	0.221785	3.78163	0.000155804	0.00263075				0.709	0.569	0.782	1.309	1.855	1.778	1.447		0.686667	1.59725	2.32609	1.21791
ENSMUSG00000041347	Bdkrb1	bradykinin receptor, beta 1 [Source:MGI Symbol;Acc:MGI:88144]	26.5672	11.5449	17.983	1.7698	0.454235	3.89621	9.77098e-05	0.00180875				0.184	0.198	0.082	2.561	0.609	1.669	1.542		0.154667	1.59525	10.3141	3.36655
ENSMUSG00000044337	Ackr3	atypical chemokine receptor 3 [Source:MGI Symbol;Acc:MGI:109562]	149.993	84.6971	112.681	1.38627	0.280534	4.94156	7.75018e-07	3.37549e-05				0.622	0.279	0.404	2.913	1.162	1.378	0.884		0.435	1.58425	3.64195	1.86471
ENSMUSG00000049892	Rasd1	RAS, dexamethasone-induced 1 [Source:MGI Symbol;Acc:MGI:1270848]	15.6695	9.70557	12.2615	1.67514	0.469155	3.57054	0.000356243	0.00495977				0.147	0.176	0	2.042	1.133	1.248	1.409		0.107667	1.458	13.5418	3.75935
ENSMUSG00000030382	Slc27a5	solute carrier family 27 (fatty acid transporter), member 5 [Source:MGI Symbol;Acc:MGI:1347100]	91.024	59.3566	72.9283	1.82931	0.36998	4.94434	7.64036e-07	3.33546e-05				0.079	0.283	0.369	2.224	0.976	1.067	1.491		0.243667	1.4395	5.90766	2.56259
ENSMUSG00000006342	Susd2	sushi domain containing 2 [Source:MGI Symbol;Acc:MGI:1918983]	62.366	46.628	53.3729	2.08378	0.351655	5.92563	3.11102e-09	2.77476e-07				0.222	0.094	0.297	1.624	0.991	1.588	1.528		0.204333	1.43275	7.01183	2.80979
ENSMUSG00000070902	Zfp352	zinc finger protein 352 [Source:MGI Symbol;Acc:MGI:2387418]	66.9382	37.9584	50.3783	1.71301	0.380302	4.50434	6.65781e-06	0.000206847				0.125	0.18	0.444	2.049	0.553	1.563	1.543		0.249667	1.427	5.71562	2.51491
ENSMUSG00000029819	Npy	neuropeptide Y [Source:MGI Symbol;Acc:MGI:97374]	57.6726	39.4154	47.2399	2.15364	0.369819	5.8235	5.76267e-09	4.73224e-07				0.19	0.114	0.211	3.024	0.7	0.216	1.728		0.171667	1.417	8.25437	3.04516
ENSMUSG00000053687	Dpep2	dipeptidase 2 [Source:MGI Symbol;Acc:MGI:2442042]	81.9641	89.0522	86.0145	1.81968	0.310778	5.85524	4.76318e-09	4.01766e-07				0.218	0.155	0.5	1.438	1.268	1.182	1.732		0.291	1.405	4.82818	2.27148
ENSMUSG00000087444	Gm5475	predicted gene 5475 [Source:MGI Symbol;Acc:MGI:3646320]	54.4464	38.6717	45.4323	1.23134	0.352653	3.49163	0.000480076	0.00604669				0.359	0.258	0.509	1.424	0.824	1.812	1.355		0.375333	1.35375	3.60679	1.85072
ENSMUSG00000042262	Ccr8	chemokine (C-C motif) receptor 8 [Source:MGI Symbol;Acc:MGI:1201402]	18.8853	15.7662	17.1029	1.89975	0.462379	4.10864	3.98001e-05	0.000887456				0	0.028	0.276	1.515	0.583	1.146	1.955		0.101333	1.29975	12.8265	3.68105
ENSMUSG00000030336	Cd27	CD27 antigen [Source:MGI Symbol;Acc:MGI:88326]	38.6287	17.7131	26.677	2.31339	0.430056	5.37926	7.47906e-08	4.45422e-06				0.059	0.106	0.109	1.983	0.91	1.365	0.875		0.0913333	1.28325	14.0502	3.81252
ENSMUSG00000094635	Gm7104	predicted gene 7104 [Source:MGI Symbol;Acc:MGI:3779672]	12.463	6.50528	9.0586	1.63316	0.471175	3.46615	0.000527976	0.00643688				0	0.102	0.063	1.579	1.126	1.528	0.892		0.055	1.28125	23.2955	4.54198
ENSMUSG00000021614	Vcan	versican [Source:MGI Symbol;Acc:MGI:102889]	740.009	524.401	616.804	1.65002	0.173786	9.49457	2.21119e-21	1.64875e-18				0.473	0.326	0.215	2.094	1.09	0.842	1.057		0.338	1.27075	3.75962	1.91059
ENSMUSG00000036887	C1qa	complement component 1, q subcomponent, alpha polypeptide [Source:MGI Symbol;Acc:MGI:88223]	29.2495	9.54698	17.9909	1.58452	0.457755	3.46149	0.00053719	0.00652362				0.12	0.161	0.166	2.495	1.021	1.313	0.235		0.149	1.266	8.49664	3.08689
ENSMUSG00000033634	Cml2	camello-like 2 [Source:MGI Symbol;Acc:MGI:2136446]	31.7145	14.8181	22.0594	2.21209	0.441973	5.00504	5.58503e-07	2.558e-05				0.162	0.021	0.077	1.325	0.713	1.995	0.967		0.0866667	1.25	14.4231	3.85031
ENSMUSG00000031494	Cd209a	CD209a antigen [Source:MGI Symbol;Acc:MGI:2157942]	46.5895	28.2081	36.0858	1.45232	0.379546	3.82646	0.000129999	0.00227114				0.324	0.18	0.291	1.772	0.579	1.291	1.213		0.265	1.21375	4.58019	2.19541
ENSMUSG00000021754	Map3k1	mitogen-activated protein kinase kinase kinase 1 [Source:MGI Symbol;Acc:MGI:1346872]	470.112	408.315	434.8	1.4942	0.232205	6.43482	1.23616e-10	1.5061e-08				0.217	0.583	0.292	1.607	1.356	0.598	1.253		0.364	1.2035	3.30632	1.72523
ENSMUSG00000030917	Tmem159	transmembrane protein 159 [Source:MGI Symbol;Acc:MGI:1925752]	117.289	116.184	116.657	2.18265	0.289305	7.54445	4.54194e-14	1.26368e-11				0.157	0.316	0.113	1.561	1.474	0.518	1.26		0.195333	1.20325	6.15998	2.62293
ENSMUSG00000006782	Cnp	2',3'-cyclic nucleotide 3' phosphodiesterase [Source:MGI Symbol;Acc:MGI:88437]	114.333	106.433	109.819	1.5982	0.290991	5.49226	3.96825e-08	2.62032e-06				0.221	0.267	0.369	1.667	0.723	0.676	1.745		0.285667	1.20275	4.21033	2.07393
ENSMUSG00000022184	Fbxo4	F-box protein 4 [Source:MGI Symbol;Acc:MGI:2146220]	100.382	88.4043	93.5377	1.46215	0.300523	4.86536	1.14247e-06	4.73528e-05				0.183	0.318	0.446	1.359	0.942	1.029	1.423		0.315667	1.18825	3.76426	1.91236
ENSMUSG00000019975	Ikbip	IKBKB interacting protein [Source:MGI Symbol;Acc:MGI:1914704]	167.477	119.891	140.285	0.954289	0.249232	3.82891	0.00012871	0.00226047				0.364	0.5	0.447	1.076	0.933	1.616	1.126		0.437	1.18775	2.71796	1.44253
ENSMUSG00000034320	Slc26a2	solute carrier family 26 (sulfate transporter), member 2 [Source:MGI Symbol;Acc:MGI:892977]	147.097	95.5042	117.615	1.68316	0.270596	6.2202	4.96525e-10	5.25894e-08				0.249	0.178	0.337	1.469	0.733	1.406	1.112		0.254667	1.18	4.63351	2.2121
ENSMUSG00000022425	Enpp2	ectonucleotide pyrophosphatase/phosphodiesterase 2 [Source:MGI Symbol;Acc:MGI:1321390]	441.534	452.486	447.792	3.55257	0.196268	18.1006	3.15363e-73	5.87868e-69				0.083	0.073	0.08	1.695	1.041	0.373	1.526		0.0786667	1.15875	14.7299	3.88067
ENSMUSG00000017405	Nek8	NIMA (never in mitosis gene a)-related expressed kinase 8 [Source:MGI Symbol;Acc:MGI:1890646]	91.6978	49.8121	67.7631	1.30852	0.314877	4.15567	3.24337e-05	0.000756691				0.343	0.374	0.208	1.391	0.954	1.538	0.705		0.308333	1.147	3.72	1.8953
ENSMUSG00000044345	Marveld1	MARVEL (membrane-associating) domain containing 1 [Source:MGI Symbol;Acc:MGI:2147570]	25.5604	25.4849	25.5173	1.5648	0.415704	3.76422	0.000167069	0.00278564				0.241	0.108	0.289	1.534	0.995	0.682	1.312		0.212667	1.13075	5.31701	2.41061
ENSMUSG00000038751	Ptk6	PTK6 protein tyrosine kinase 6 [Source:MGI Symbol;Acc:MGI:99683]	62.7813	42.3306	51.0952	2.10045	0.362939	5.78733	7.15123e-09	5.74595e-07				0.086	0.145	0.211	1.208	0.682	1.334	1.295		0.147333	1.12975	7.66799	2.93885
ENSMUSG00000032064	Dixdc1	DIX domain containing 1 [Source:MGI Symbol;Acc:MGI:2679721]	591.66	534.763	559.147	0.778202	0.170049	4.57633	4.73195e-06	0.000156954				0.623	0.49	0.537	1.634	1.058	0.771	1.009		0.55	1.118	2.03273	1.02342
ENSMUSG00000072963	Gm10447	predicted gene 10447 [Source:MGI Symbol;Acc:MGI:3642647]	20.5796	5.62851	12.0361	1.72172	0.46841	3.67568	0.000237219	0.00363951				0.112	0.034	0.083	1.626	0.66	1.855	0.294		0.0763333	1.10875	14.5251	3.86048
ENSMUSG00000037577	Ephx3	epoxide hydrolase 3 [Source:MGI Symbol;Acc:MGI:1919182]	46.9732	18.7552	30.8486	2.09311	0.415814	5.03378	4.80911e-07	2.24117e-05				0.105	0.107	0.116	1.635	0.922	1.438	0.391		0.109333	1.0965	10.029	3.3261
ENSMUSG00000054568	Usp17la	ubiquitin specific peptidase 17-like A [Source:MGI Symbol;Acc:MGI:107699]	39.3863	27.6309	32.669	1.42369	0.389853	3.65187	0.00026034	0.00389174				0.198	0.205	0.287	0.981	0.588	1.49	1.277		0.23	1.084	4.71304	2.23666
ENSMUSG00000067578	Cbln4	cerebellin 4 precursor protein [Source:MGI Symbol;Acc:MGI:2154433]	38.8785	38.204	38.4931	1.7871	0.403099	4.43339	9.27624e-06	0.000272742				0.191	0.182	0.092	1.265	0.539	0.625	1.78		0.155	1.05225	6.78871	2.76314
ENSMUSG00000044172	Ptx4	pentraxin 4 [Source:MGI Symbol;Acc:MGI:1915759]	25.0663	22.5459	23.6261	1.72157	0.438454	3.92646	8.62064e-05	0.00164312				0.172	0.017	0.254	1.398	0.823	0.786	1.152		0.147667	1.03975	7.0412	2.81582
ENSMUSG00000079168	Cd209g	CD209g antigen [Source:MGI Symbol;Acc:MGI:1917442]	17.5103	16.9585	17.195	2.20229	0.45488	4.84147	1.28883e-06	5.26866e-05				0.072	0.021	0.079	1.081	0.553	0.813	1.627		0.0573333	1.0185	17.7645	4.15093
ENSMUSG00000051457	Spn	sialophorin [Source:MGI Symbol;Acc:MGI:98384]	34.5677	27.3414	30.4384	1.42249	0.417905	3.40385	0.000664435	0.00760795				0.046	0.208	0.393	0.939	0.816	1.224	1.091		0.215667	1.0175	4.71793	2.23815
ENSMUSG00000025386	Pde6g	phosphodiesterase 6G, cGMP-specific, rod, gamma [Source:MGI Symbol;Acc:MGI:97526]	40.4085	22.3453	30.0867	1.8144	0.405897	4.47009	7.81873e-06	0.000236605				0.117	0.171	0.146	1.323	0.823	1.161	0.728		0.144667	1.00875	6.97293	2.80176
ENSMUSG00000037548	H2-DMb2	histocompatibility 2, class II, locus Mb2 [Source:MGI Symbol;Acc:MGI:95923]	41.5202	41.9246	41.7513	2.0291	0.383277	5.29408	1.19614e-07	6.65592e-06				0.084	0.056	0.29	0.891	0.75	1.023	1.342		0.143333	1.0015	6.98721	2.80472
ENSMUSG00000046160	Olig1	oligodendrocyte transcription factor 1 [Source:MGI Symbol;Acc:MGI:1355334]	11.9087	8.48033	9.94962	1.64159	0.471462	3.48192	0.00049783	0.00616614				0.04	0.108	0	1.25	0.748	0.792	1.15		0.0493333	0.985	19.9662	4.31949
ENSMUSG00000023979	Guca1b	guanylate cyclase activator 1B [Source:MGI Symbol;Acc:MGI:1194489]	57.8671	25.2908	39.252	1.47909	0.376249	3.93115	8.45393e-05	0.00161796				0.216	0.194	0.189	1.307	0.653	1.452	0.507		0.199667	0.97975	4.90693	2.29482
ENSMUSG00000032773	Chrm1	cholinergic receptor, muscarinic 1, CNS [Source:MGI Symbol;Acc:MGI:88396]	122.837	102.781	111.376	1.36212	0.271259	5.02147	5.12767e-07	2.37773e-05				0.497	0.207	0.203	1.508	0.884	0.679	0.844		0.302333	0.97875	3.23732	1.6948
ENSMUSG00000021835	Bmp4	bone morphogenetic protein 4 [Source:MGI Symbol;Acc:MGI:88180]	34.7172	33.1748	33.8358	2.29118	0.398342	5.7518	8.83004e-09	6.97461e-07				0.06	0.076	0.147	0.86	0.652	0.957	1.422		0.0943333	0.97275	10.3118	3.36623
ENSMUSG00000043740	B430306N03Rik	RIKEN cDNA B430306N03 gene [Source:MGI Symbol;Acc:MGI:2443478]	62.964	46.6171	53.6229	1.85274	0.347856	5.32616	1.0031e-07	5.75349e-06				0.151	0.1	0.255	1.365	0.577	0.797	1.079		0.168667	0.9545	5.65909	2.50057
ENSMUSG00000049612	Omg	oligodendrocyte myelin glycoprotein [Source:MGI Symbol;Acc:MGI:106586]	18.0562	10.6227	13.8085	2.03736	0.46557	4.37606	1.20845e-05	0.000339768				0.056	0.025	0.062	1.934	1.012	0.355	0.51		0.0476667	0.95275	19.9878	4.32105
ENSMUSG00000030468	Siglecg	sialic acid binding Ig-like lectin G [Source:MGI Symbol;Acc:MGI:2443630]	60.5836	36.9859	47.0992	2.17436	0.361962	6.00714	1.88822e-09	1.76876e-07				0.119	0.13	0.094	1.152	0.965	1.035	0.556		0.114333	0.927	8.10787	3.01932
ENSMUSG00000022742	Cpox	coproporphyrinogen oxidase [Source:MGI Symbol;Acc:MGI:104841]	58.4133	46.5185	51.6162	1.41615	0.343261	4.12558	3.69796e-05	0.000833539				0.203	0.221	0.263	1.075	0.635	0.9	1.087		0.229	0.92425	4.03603	2.01294
ENSMUSG00000012777	Acpt	acid phosphatase, testicular [Source:MGI Symbol;Acc:MGI:3644563]	31.8797	15.1269	22.3066	2.50925	0.44291	5.66538	1.46699e-08	1.10713e-06				0.082	0.015	0.037	1.463	0.673	0.935	0.605		0.0446667	0.919	20.5746	4.36279
ENSMUSG00000024803	Ankrd1	ankyrin repeat domain 1 (cardiac muscle) [Source:MGI Symbol;Acc:MGI:1097717]	44.9992	33.1646	38.2366	1.58504	0.376491	4.21003	2.55335e-05	0.000627929				0.219	0.098	0.243	1.104	0.652	1.024	0.889		0.186667	0.91725	4.91384	2.29685
ENSMUSG00000063089	Klk1b8	kallikrein 1-related peptidase b8 [Source:MGI Symbol;Acc:MGI:892018]	22.2988	17.2885	19.4358	1.7752	0.443485	4.00283	6.25895e-05	0.00127651				0.061	0.072	0.201	1.052	0.645	0.914	1.056		0.111333	0.91675	8.23428	3.04164
ENSMUSG00000019055	Plod1	procollagen-lysine, 2-oxoglutarate 5-dioxygenase 1 [Source:MGI Symbol;Acc:MGI:99907]	158.541	120.184	136.623	1.49934	0.270322	5.54651	2.91429e-08	1.98994e-06				0.195	0.261	0.265	1.338	0.891	0.642	0.753		0.240333	0.906	3.76976	1.91447
ENSMUSG00000018776	Slc35g3	solute carrier family 35, member G3 [Source:MGI Symbol;Acc:MGI:1927128]	9.05988	7.93682	8.41813	1.86027	0.468962	3.96678	7.28509e-05	0.0014325				0	0	0	1.083	1.098	0.647	0.761		0	0.89725	#DIV/0!	#DIV/0!
ENSMUSG00000002984	Tomm40	translocase of outer mitochondrial membrane 40 homolog (yeast) [Source:MGI Symbol;Acc:MGI:1858259]	83.1202	58.9592	69.3139	1.42269	0.314828	4.51895	6.21466e-06	0.000195358				0.244	0.214	0.203	0.913	0.586	1.125	0.959		0.220333	0.89575	4.06543	2.02341
ENSMUSG00000048814	Lonrf2	LON peptidase N-terminal domain and ring finger 2 [Source:MGI Symbol;Acc:MGI:1920209]	269.605	224.643	243.912	0.727102	0.204253	3.55981	0.000371127	0.00511135				0.477	0.36	0.415	1.097	0.738	0.9	0.787		0.417333	0.8805	2.10982	1.07712
ENSMUSG00000005983	1700037C18Rik	RIKEN cDNA 1700037C18 gene [Source:MGI Symbol;Acc:MGI:1920511]	84.3834	56.2637	68.315	1.11899	0.314811	3.55447	0.000378743	0.00517606				0.473	0.149	0.241	1.177	0.563	1.095	0.652		0.287667	0.87175	3.03042	1.59952
ENSMUSG00000048249	Crebrf	CREB3 regulatory factor [Source:MGI Symbol;Acc:MGI:1924378]	380.354	316.239	343.716	0.75267	0.213242	3.52964	0.000416118	0.00549662				0.354	0.442	0.467	1.237	0.745	0.645	0.852		0.421	0.86975	2.06591	1.04678
ENSMUSG00000059623	Olfr39	olfactory receptor 39 [Source:MGI Symbol;Acc:MGI:1313142]	21.891	16.5194	18.8215	1.62629	0.451585	3.60129	0.000316644	0.0045265				0.281	0.036	0.044	1.292	0.863	0.683	0.631		0.120333	0.86725	7.20706	2.84941
ENSMUSG00000036813	Entpd8	ectonucleoside triphosphate diphosphohydrolase 8 [Source:MGI Symbol;Acc:MGI:1919340]	31.1977	18.2311	23.7882	1.5935	0.437462	3.6426	0.000269902	0.00399156				0.064	0.072	0.265	0.915	0.685	1.265	0.584		0.133667	0.86225	6.45075	2.68947
ENSMUSG00000058398	Prss43	protease, serine 43 [Source:MGI Symbol;Acc:MGI:2684822]	23.6187	21.3087	22.2987	1.71879	0.433546	3.9645	7.35486e-05	0.00144166				0.05	0.06	0.26	0.758	0.48	0.973	1.228		0.123333	0.85975	6.97095	2.80135
ENSMUSG00000022894	Adamts5	a disintegrin-like and metallopeptidase (reprolysin type) with thrombospondin type 1 motif, 5 (aggrecanase-2) [Source:MGI Symbol;Acc:MGI:1346321]	208.763	178.643	191.552	2.16515	0.234866	9.21867	3.00819e-20	1.64929e-17				0.151	0.17	0.125	1.268	0.863	0.438	0.857		0.148667	0.8565	5.76121	2.52637
ENSMUSG00000031932	Gpr83	G protein-coupled receptor 83 [Source:MGI Symbol;Acc:MGI:95712]	52.5283	47.3081	49.5453	1.43611	0.34885	4.11669	3.84354e-05	0.000860114				0.196	0.132	0.316	0.993	0.674	0.797	0.939		0.214667	0.85075	3.96312	1.98664
ENSMUSG00000060548	Tnfrsf19	tumor necrosis factor receptor superfamily, member 19 [Source:MGI Symbol;Acc:MGI:1352474]	458.62	481.023	471.421	0.666639	0.198893	3.35174	0.000803042	0.00875922				0.603	0.249	0.534	1.258	0.724	0.602	0.8		0.462	0.846	1.83117	0.872765
ENSMUSG00000063767	S100a7a	S100 calcium binding protein A7A [Source:MGI Symbol;Acc:MGI:2687194]	21.5771	16.9507	18.9335	1.49978	0.442123	3.39222	0.000693279	0.00784664				0.217	0.106	0.088	0.859	0.632	0.951	0.931		0.137	0.84325	6.15511	2.62178
ENSMUSG00000079429	Mroh2a	maestro heat-like repeat family member 2A [Source:MGI Symbol;Acc:MGI:3705228]	199.598	122.792	155.709	1.53815	0.263401	5.83958	5.23325e-09	4.39428e-07				0.213	0.211	0.16	1.067	0.482	0.89	0.806		0.194667	0.81125	4.16738	2.05914
ENSMUSG00000047446	Arl4a	ADP-ribosylation factor-like 4A [Source:MGI Symbol;Acc:MGI:99437]	187.774	113.666	145.427	1.26985	0.309429	4.10385	4.06328e-05	0.000903862				0.188	0.283	0.211	1.414	0.397	0.499	0.874		0.227333	0.796	3.50147	1.80796
ENSMUSG00000004948	Zp3	zona pellucida glycoprotein 3 [Source:MGI Symbol;Acc:MGI:99215]	40.2762	25.4058	31.7788	2.24388	0.409319	5.482	4.20546e-08	2.7315e-06				0.111	0.073	0.034	1.073	0.535	0.702	0.768		0.0726667	0.7695	10.5894	3.40456
ENSMUSG00000027422	Rrbp1	ribosome binding protein 1 [Source:MGI Symbol;Acc:MGI:1932395]	305.169	224.333	258.977	1.87167	0.236402	7.91733	2.42673e-15	7.93625e-13				0.119	0.157	0.183	0.944	0.488	0.739	0.905		0.153	0.769	5.02614	2.32945
ENSMUSG00000051043	Gprc5c	G protein-coupled receptor, family C, group 5, member C [Source:MGI Symbol;Acc:MGI:1917605]	90.1283	77.4619	82.8903	2.32654	0.317796	7.32085	2.46413e-13	5.21976e-11				0.105	0.058	0.138	0.874	0.762	0.712	0.726		0.100333	0.7685	7.65947	2.93724
ENSMUSG00000058620	Adra2b	adrenergic receptor, alpha 2b [Source:MGI Symbol;Acc:MGI:87935]	21.0704	9.01806	14.1834	2.10355	0.46394	4.5341	5.78491e-06	0.000185605				0.065	0.019	0.024	1.234	0.545	0.822	0.45		0.036	0.76275	21.1875	4.40514
ENSMUSG00000059201	Lep	leptin [Source:MGI Symbol;Acc:MGI:104663]	69.272	33.6706	48.9284	2.67267	0.400232	6.67781	2.42536e-11	3.47778e-09				0.069	0.068	0.007	1.022	0.453	0.895	0.678		0.048	0.762	15.875	3.98868
ENSMUSG00000024011	Pi16	peptidase inhibitor 16 [Source:MGI Symbol;Acc:MGI:1921366]	64.1276	25.6067	42.1156	1.43812	0.406215	3.54029	0.000399687	0.00536012				0.057	0.265	0.136	1.068	0.496	0.986	0.472		0.152667	0.7555	4.94869	2.30705
ENSMUSG00000044405	Adig	adipogenin [Source:MGI Symbol;Acc:MGI:2675492]	24.2624	17.561	20.4331	1.9751	0.447006	4.41852	9.93805e-06	0.000290554				0.077	0.014	0.12	0.913	0.63	0.788	0.687		0.0703333	0.7545	10.7275	3.42324
ENSMUSG00000023439	Gnb3	guanine nucleotide binding protein (G protein), beta 3 [Source:MGI Symbol;Acc:MGI:95785]	29.0758	19.5566	23.6362	1.49007	0.431436	3.45374	0.000552869	0.00666195				0.086	0.09	0.238	1.143	0.583	0.648	0.636		0.138	0.7525	5.4529	2.44702
ENSMUSG00000027579	Srms	src-related kinase lacking C-terminal regulatory tyrosine and N-terminal myristylation sites [Source:MGI Symbol;Acc:MGI:101865]	29.6086	26.3278	27.7339	1.90217	0.424889	4.47687	7.57448e-06	0.000230336				0.091	0.081	0.075	0.59	0.274	0.834	1.274		0.0823333	0.743	9.02429	3.17381
ENSMUSG00000004939	Nmrk2	nicotinamide riboside kinase 2 [Source:MGI Symbol;Acc:MGI:1916814]	17.9327	10.2067	13.5178	1.72826	0.469163	3.6837	0.000229872	0.00355606				0.045	0.1	0	1.009	0.443	0.695	0.818		0.0483333	0.74125	15.3362	3.93887
ENSMUSG00000043925	Olfr544	olfactory receptor 544 [Source:MGI Symbol;Acc:MGI:3030378]	23.2723	8.17092	14.6429	1.79657	0.4629	3.88112	0.000103977	0.00189651				0.144	0.037	0	1.216	0.408	0.933	0.377		0.0603333	0.7335	12.1575	3.60377
ENSMUSG00000028927	Padi2	peptidyl arginine deiminase, type II [Source:MGI Symbol;Acc:MGI:1338892]	164.952	144.223	153.107	3.26654	0.452093	7.22539	4.99673e-13	1.01244e-10				0.015	0.002	0.014	1.077	0.821	0.341	0.669		0.0103333	0.727	70.3548	6.13658
ENSMUSG00000047854	Stx19	syntaxin 19 [Source:MGI Symbol;Acc:MGI:1915409]	44.4005	34.6215	38.8125	1.30393	0.367631	3.54684	0.00038988	0.00527707				0.187	0.176	0.198	0.745	0.57	0.834	0.747		0.187	0.724	3.87166	1.95295
ENSMUSG00000050114	Prdx6b	peroxiredoxin 6B [Source:MGI Symbol;Acc:MGI:1336888]	12.15	7.8054	9.66735	1.73722	0.471444	3.6849	0.000228791	0.00354816				0.03	0.054	0	0.832	0.594	0.763	0.705		0.028	0.7235	25.8393	4.69149
ENSMUSG00000014074	Rnf168	ring finger protein 168 [Source:MGI Symbol;Acc:MGI:1917488]	112.531	100.886	105.876	0.921262	0.268375	3.43274	0.000597517	0.00707194				0.284	0.22	0.359	0.751	0.599	0.81	0.725		0.287667	0.72125	2.50724	1.3261
ENSMUSG00000035509	Fbxl21	F-box and leucine-rich repeat protein 21 [Source:MGI Symbol;Acc:MGI:2442921]	61.7778	60.9577	61.3092	1.43891	0.338017	4.25692	2.07266e-05	0.000533653				0.229	0.111	0.204	0.69	0.771	0.745	0.659		0.181333	0.71625	3.94991	1.98182
ENSMUSG00000047884	Klk9	kallikrein related-peptidase 9 [Source:MGI Symbol;Acc:MGI:1921082]	24.4401	9.29944	15.7883	2.29257	0.462843	4.95324	7.29868e-07	3.21642e-05				0.018	0.016	0.039	1.295	0.41	0.678	0.464		0.0243333	0.71175	29.25	4.87036
ENSMUSG00000043088	Il17re	interleukin 17 receptor E [Source:MGI Symbol;Acc:MGI:1889371]	62.1143	27.264	42.1999	2.25424	0.387564	5.81644	6.0113e-09	4.91476e-07				0.084	0.057	0.07	0.99	0.635	0.936	0.258		0.0703333	0.70475	10.0201	3.32483
ENSMUSG00000029408	Abcb9	ATP-binding cassette, sub-family B (MDR/TAP), member 9 [Source:MGI Symbol;Acc:MGI:1861729]	169.324	89.427	123.669	1.75029	0.283592	6.17189	6.74803e-10	6.98834e-08				0.123	0.133	0.151	1.016	0.463	0.763	0.501		0.135667	0.68575	5.05467	2.33762
ENSMUSG00000075307	Klhl41	kelch-like 41 [Source:MGI Symbol;Acc:MGI:2683854]	60.9714	41.4915	49.84	1.74088	0.353452	4.92535	8.42074e-07	3.65049e-05				0.153	0.071	0.156	0.861	0.526	0.754	0.56		0.126667	0.67525	5.33092	2.41438
ENSMUSG00000070337	Gpr179	G protein-coupled receptor 179 [Source:MGI Symbol;Acc:MGI:2443409]	78.9599	56.9995	66.4111	2.00746	0.398298	5.0401	4.65299e-07	2.17931e-05				0.095	0.004	0.177	0.781	0.481	0.777	0.611		0.092	0.6625	7.20109	2.84821
ENSMUSG00000022986	Krt75	keratin 75 [Source:MGI Symbol;Acc:MGI:1923500]	37.443	28.9684	32.6004	2.68341	0.439097	6.11119	9.8888e-10	9.6009e-08				0.025	0	0.063	0.696	0.702	0.706	0.535		0.0293333	0.65975	22.4915	4.49131
ENSMUSG00000014782	Plekhg4	pleckstrin homology domain containing, family G (with RhoGef domain) member 4 [Source:MGI Symbol;Acc:MGI:2142544]	44.1861	24.5836	32.9846	1.56278	0.389659	4.01063	6.05577e-05	0.00124187				0.144	0.121	0.11	0.845	0.426	0.816	0.542		0.125	0.65725	5.258	2.39451
ENSMUSG00000038745	Nlrp6	NLR family, pyrin domain containing 6 [Source:MGI Symbol;Acc:MGI:2141990]	35.2932	21.381	27.3434	1.77205	0.429919	4.12181	3.75901e-05	0.000845255				0.062	0.037	0.173	0.959	0.528	0.678	0.463		0.0906667	0.657	7.24632	2.85725
ENSMUSG00000039084	Chad	chondroadherin [Source:MGI Symbol;Acc:MGI:1096866]	21.8171	4.55175	11.9512	1.83636	0.470415	3.90371	9.47293e-05	0.00176206				0.021	0.038	0.023	1.691	0.373	0.389	0.111		0.0273333	0.641	23.4512	4.55159
ENSMUSG00000022099	Dmtn	dematin actin binding protein [Source:MGI Symbol;Acc:MGI:99670]	138.315	122.165	129.087	1.13861	0.289087	3.93864	8.1946e-05	0.00157805				0.454	0.119	0.13	0.797	0.486	0.66	0.607		0.234333	0.6375	2.72048	1.44386
ENSMUSG00000004043	Stat5a	signal transducer and activator of transcription 5A [Source:MGI Symbol;Acc:MGI:103036]	104.353	61.1057	79.6404	2.48854	0.330759	7.52374	5.32299e-14	1.39755e-11				0.043	0.054	0.1	0.779	0.449	0.748	0.551		0.0656667	0.63175	9.62056	3.26612
ENSMUSG00000034825	Nrip3	nuclear receptor interacting protein 3 [Source:MGI Symbol;Acc:MGI:1925843]	89.4415	75.7153	81.598	1.62546	0.296027	5.49092	3.99834e-08	2.62441e-06				0.187	0.158	0.096	0.82	0.702	0.449	0.509		0.147	0.62	4.21769	2.07645
ENSMUSG00000037583	Nr0b2	nuclear receptor subfamily 0, group B, member 2 [Source:MGI Symbol;Acc:MGI:1346344]	14.3882	4.92378	8.97997	1.63771	0.470278	3.48243	0.000496885	0.00616272				0.027	0	0.03	0.475	0.602	1.315	0.071		0.019	0.61575	32.4079	5.01827
ENSMUSG00000043505	Gimap5	GTPase, IMAP family member 5 [Source:MGI Symbol;Acc:MGI:2442232]	35.3713	17.3794	25.0902	1.60008	0.419066	3.81821	0.000134425	0.00233188				0.205	0.048	0.06	0.936	0.285	0.747	0.479		0.104333	0.61175	5.86342	2.55174
ENSMUSG00000040189	Ccdc114	coiled-coil domain containing 114 [Source:MGI Symbol;Acc:MGI:2446120]	83.0051	51.5419	65.0262	1.85476	0.330898	5.60524	2.07961e-08	1.48529e-06				0.138	0.079	0.102	0.803	0.587	0.69	0.352		0.106333	0.608	5.71787	2.51548
ENSMUSG00000041479	Syt15	synaptotagmin XV [Source:MGI Symbol;Acc:MGI:2442166]	36.1346	29.1572	32.1475	2.05039	0.400011	5.12584	2.96215e-07	1.4764e-05				0.064	0.05	0.106	0.818	0.334	0.44	0.814		0.0733333	0.6015	8.20227	3.03602
ENSMUSG00000073795	6430531B16Rik	RIKEN cDNA 6430531B16 gene [Source:MGI Symbol;Acc:MGI:2685939]	30.1566	10.4186	18.8777	1.72265	0.448005	3.84517	0.000120471	0.00213673				0.067	0.084	0.044	0.767	0.251	0.966	0.42		0.065	0.601	9.24615	3.20885
ENSMUSG00000020912	Krt12	keratin 12 [Source:MGI Symbol;Acc:MGI:96687]	25.4023	16.7075	20.4338	1.44641	0.437538	3.3058	0.000947051	0.00975358				0.131	0.024	0.174	0.751	0.288	0.741	0.617		0.109667	0.59925	5.46429	2.45003
ENSMUSG00000028037	Ifi44	interferon-induced protein 44 [Source:MGI Symbol;Acc:MGI:2443016]	64.8678	54.0748	58.7004	1.82235	0.33183	5.49182	3.97806e-08	2.62032e-06				0.104	0.098	0.115	0.567	0.44	0.648	0.712		0.105667	0.59175	5.60016	2.48547
ENSMUSG00000044294	Krt84	keratin 84 [Source:MGI Symbol;Acc:MGI:96700]	25.4503	21.5589	23.2266	1.81484	0.42657	4.25449	2.09528e-05	0.000538733				0.066	0.06	0.11	0.616	0.573	0.596	0.58		0.0786667	0.59125	7.51589	2.90994
ENSMUSG00000056091	St3gal5	ST3 beta-galactoside alpha-2,3-sialyltransferase 5 [Source:MGI Symbol;Acc:MGI:1339963]	236.223	201.104	216.155	0.80216	0.231934	3.45857	0.000543058	0.00655644				0.229	0.322	0.28	0.835	0.596	0.38	0.543		0.277	0.5885	2.12455	1.08716
ENSMUSG00000046589	Lrrc8e	leucine rich repeat containing 8 family, member E [Source:MGI Symbol;Acc:MGI:1919517]	32.8939	30.9648	31.7916	1.87631	0.410547	4.57026	4.8713e-06	0.000160435				0.057	0.051	0.144	0.662	0.679	0.494	0.509		0.084	0.586	6.97619	2.80244
ENSMUSG00000021567	Nkd2	naked cuticle 2 homolog (Drosophila) [Source:MGI Symbol;Acc:MGI:1919543]	104.194	84.6001	92.9977	1.52143	0.321199	4.73673	2.17189e-06	8.16254e-05				0.264	0.048	0.118	0.572	0.35	0.777	0.644		0.143333	0.58575	4.08663	2.03091
ENSMUSG00000032584	Mst1r	macrophage stimulating 1 receptor (c-met-related tyrosine kinase) [Source:MGI Symbol;Acc:MGI:99614]	46.4333	40.6235	43.1134	1.40771	0.386172	3.64529	0.000267092	0.00396407				0.307	0.063	0.064	0.799	0.31	0.479	0.752		0.144667	0.585	4.04378	2.0157
ENSMUSG00000018740	Slc25a35	solute carrier family 25, member 35 [Source:MGI Symbol;Acc:MGI:1919248]	29.0301	9.61538	17.936	1.66091	0.450629	3.68576	0.000228024	0.00353922				0.125	0.025	0.061	0.866	0.351	0.941	0.181		0.0703333	0.58475	8.31398	3.05554
ENSMUSG00000057817	Olfr1446	olfactory receptor 1446 [Source:MGI Symbol;Acc:MGI:3031280]	14.1979	8.26292	10.8065	1.56925	0.470127	3.33792	0.000844085	0.00906893				0.044	0	0.098	0.461	0.097	0.969	0.809		0.0473333	0.584	12.338	3.62504
ENSMUSG00000054763	Defb42	defensin beta 42 [Source:MGI Symbol;Acc:MGI:3033850]	40.082	31.8814	35.396	1.35949	0.381937	3.55947	0.000371608	0.00511228				0.108	0.118	0.197	0.672	0.375	0.591	0.688		0.141	0.5815	4.12411	2.04408
ENSMUSG00000053604	Rpia	ribose 5-phosphate isomerase A [Source:MGI Symbol;Acc:MGI:103254]	105.734	76.2676	88.8962	1.20662	0.287076	4.20314	2.63243e-05	0.000643977				0.195	0.161	0.187	0.713	0.52	0.65	0.443		0.181	0.5815	3.21271	1.68379
ENSMUSG00000030159	Clec1b	C-type lectin domain family 1, member b [Source:MGI Symbol;Acc:MGI:1913287]	49.7877	28.1319	37.413	1.39347	0.399328	3.48954	0.00048386	0.00608203				0.122	0.084	0.175	0.773	0.545	0.751	0.244		0.127	0.57825	4.55315	2.18686
ENSMUSG00000004842	Pou1f1	POU domain, class 1, transcription factor 1 [Source:MGI Symbol;Acc:MGI:97588]	54.0178	34.9058	43.0966	1.65308	0.363419	4.54868	5.39828e-06	0.000174704				0.155	0.086	0.086	0.642	0.492	0.717	0.405		0.109	0.564	5.17431	2.37137
ENSMUSG00000070798	Psg25	pregnancy-specific glycoprotein 25 [Source:MGI Symbol;Acc:MGI:1891357]	46.2315	31.3338	37.7185	1.4382	0.396735	3.6251	0.000288855	0.00422981				0.076	0.025	0.289	0.812	0.129	0.613	0.701		0.13	0.56375	4.33654	2.11654
ENSMUSG00000042367	Gjb3	gap junction protein, beta 3 [Source:MGI Symbol;Acc:MGI:95721]	19.8921	10.6211	14.5944	2.0586	0.466039	4.41724	9.99696e-06	0.000291177				0.062	0.014	0	0.642	0.305	0.741	0.564		0.0253333	0.563	22.2237	4.47403
ENSMUSG00000026432	Avpr1b	arginine vasopressin receptor 1B [Source:MGI Symbol;Acc:MGI:1347010]	45.4964	28.3287	35.6863	1.8804	0.400454	4.69565	2.65754e-06	9.69456e-05				0.041	0.061	0.135	0.717	0.283	0.613	0.62		0.079	0.55825	7.06646	2.82099
ENSMUSG00000042647	Acad12	acyl-Coenzyme A dehydrogenase family, member 12 [Source:MGI Symbol;Acc:MGI:2443320]	75.3334	72.3634	73.6363	1.00741	0.302715	3.32792	0.000874975	0.00929898				0.148	0.143	0.319	0.494	0.365	0.656	0.713		0.203333	0.557	2.73934	1.45383
ENSMUSG00000061808	Ttr	transthyretin [Source:MGI Symbol;Acc:MGI:98865]	26.1739	21.2673	23.3702	2.48816	0.449386	5.53681	3.08031e-08	2.07293e-06				0.01	0.051	0.011	0.893	0.555	0.189	0.573		0.024	0.5525	23.0208	4.52487
ENSMUSG00000027322	Siglec1	sialic acid binding Ig-like lectin 1, sialoadhesin [Source:MGI Symbol;Acc:MGI:99668]	58.6841	41.5077	48.869	1.95071	0.392071	4.97539	6.51152e-07	2.92485e-05				0.034	0.022	0.196	0.71	0.293	0.585	0.618		0.084	0.5515	6.56548	2.7149
ENSMUSG00000041895	Wipi1	WD repeat domain, phosphoinositide interacting 1 [Source:MGI Symbol;Acc:MGI:1261864]	143.392	97.9403	117.42	1.4351	0.29726	4.82775	1.38085e-06	5.55948e-05				0.087	0.17	0.176	0.711	0.414	0.531	0.532		0.144333	0.547	3.78984	1.92214
ENSMUSG00000028865	Cd164l2	CD164 sialomucin-like 2 [Source:MGI Symbol;Acc:MGI:1916905]	45.051	21.8638	31.8012	2.39956	0.431992	5.55463	2.78197e-08	1.92069e-06				0.076	0.031	0	0.845	0.276	0.551	0.509		0.0356667	0.54525	15.2874	3.93427
ENSMUSG00000030427	Lilra6	leukocyte immunoglobulin-like receptor, subfamily A (with TM domain), member 6 [Source:MGI Symbol;Acc:MGI:1195969]	14.3113	23.0088	19.2813	1.78442	0.441417	4.04248	5.28877e-05	0.00111525				0.06	0.054	0.079	0.374	0.513	0.338	0.907		0.0643333	0.533	8.28497	3.0505
ENSMUSG00000042459	Bpifa2	BPI fold containing family A, member 2 [Source:MGI Symbol;Acc:MGI:97787]	28.9531	16.0763	21.5949	1.50848	0.429094	3.51551	0.000438908	0.00568567				0.155	0.069	0.061	0.845	0.487	0.532	0.26		0.095	0.531	5.58947	2.48271
ENSMUSG00000051735	Rinl	Ras and Rab interactor-like [Source:MGI Symbol;Acc:MGI:2444024]	31.1717	24.5471	27.3862	1.65504	0.410531	4.03146	5.54322e-05	0.00115325				0.104	0.07	0.096	0.615	0.58	0.526	0.384		0.09	0.52625	5.84722	2.54775
ENSMUSG00000017211	Gsdma2	gasdermin A2 [Source:MGI Symbol;Acc:MGI:1921490]	28.0731	30.8458	29.6575	1.75603	0.402922	4.35825	1.31108e-05	0.00036532				0.069	0.055	0.128	0.75	0.356	0.175	0.786		0.084	0.51675	6.15179	2.62101
ENSMUSG00000024232	Bambi	BMP and activin membrane-bound inhibitor [Source:MGI Symbol;Acc:MGI:1915260]	23.6325	23.3754	23.4856	1.39745	0.422692	3.30608	0.000946102	0.00975358				0.082	0.092	0.147	0.373	0.63	0.608	0.455		0.107	0.5165	4.8271	2.27116
ENSMUSG00000034413	Neurl1b	neuralized E3 ubiquitin protein ligase 1B [Source:MGI Symbol;Acc:MGI:3643092]	97.8383	101.462	99.909	0.975685	0.277802	3.51216	0.000444476	0.00572993				0.287	0.162	0.173	0.638	0.468	0.376	0.58		0.207333	0.5155	2.48633	1.31402
ENSMUSG00000011118	Panx3	pannexin 3 [Source:MGI Symbol;Acc:MGI:1918881]	27.6894	21.6675	24.2483	1.61666	0.437023	3.69924	0.000216244	0.00338834				0.13	0	0.113	0.612	0.224	0.564	0.654		0.081	0.5135	6.33951	2.66437
ENSMUSG00000050063	Klk6	kallikrein related-peptidase 6 [Source:MGI Symbol;Acc:MGI:1343166]	24.7491	13.5699	18.361	1.96285	0.451222	4.35007	1.36096e-05	0.000376405				0.069	0	0.063	0.717	0.152	0.584	0.6		0.044	0.51325	11.6648	3.54409
ENSMUSG00000051896	Tex37	testis expressed 37 [Source:MGI Symbol;Acc:MGI:1921471]	21.6735	8.49324	14.1419	1.67197	0.468214	3.57095	0.000355693	0.00495977				0.044	0	0.082	1.079	0.261	0.398	0.309		0.042	0.51175	12.1845	3.60698
ENSMUSG00000000686	Abhd15	abhydrolase domain containing 15 [Source:MGI Symbol;Acc:MGI:1914727]	63.8188	58.2004	60.6083	2.06713	0.346513	5.96552	2.43855e-09	2.22828e-07				0.051	0.043	0.142	0.683	0.352	0.338	0.654		0.0786667	0.50675	6.44174	2.68745
ENSMUSG00000033576	Apol6	apolipoprotein L 6 [Source:MGI Symbol;Acc:MGI:1919189]	42.0508	24.3221	31.9201	1.77676	0.396125	4.48537	7.27887e-06	0.000222435				0.105	0.05	0.077	0.533	0.353	0.74	0.401		0.0773333	0.50675	6.5528	2.71211
ENSMUSG00000020892	Aloxe3	arachidonate lipoxygenase 3 [Source:MGI Symbol;Acc:MGI:1345140]	84.6022	44.0577	61.4339	1.68679	0.34828	4.84321	1.27757e-06	5.23411e-05				0.167	0.033	0.103	0.853	0.332	0.547	0.282		0.101	0.5035	4.98515	2.31764
ENSMUSG00000021256	Vash1	vasohibin 1 [Source:MGI Symbol;Acc:MGI:2442543]	46.8787	28.9947	36.6593	1.33441	0.386633	3.45136	0.000557765	0.00669929				0.11	0.093	0.164	0.706	0.405	0.557	0.337		0.122333	0.50125	4.09741	2.03471
ENSMUSG00000040296	Ddx58	DEAD (Asp-Glu-Ala-Asp) box polypeptide 58 [Source:MGI Symbol;Acc:MGI:2442858]	114.22	93.0406	102.118	1.24114	0.273849	4.53218	5.83768e-06	0.000186551				0.151	0.101	0.204	0.52	0.343	0.597	0.52		0.152	0.495	3.25658	1.70336
ENSMUSG00000022534	Mefv	Mediterranean fever [Source:MGI Symbol;Acc:MGI:1859396]	36.8689	19.6241	27.0148	1.63424	0.435312	3.75419	0.0001739	0.00287127				0.024	0.036	0.166	0.743	0.2	0.549	0.476		0.0753333	0.492	6.53097	2.7073
ENSMUSG00000072244	Trim6	tripartite motif-containing 6 [Source:MGI Symbol;Acc:MGI:2137352]	47.5613	41.5153	44.1064	1.3295	0.355164	3.74335	0.000181585	0.00296215				0.121	0.09	0.164	0.422	0.308	0.605	0.621		0.125	0.489	3.912	1.96791
ENSMUSG00000057132	Rpgrip1	retinitis pigmentosa GTPase regulator interacting protein 1 [Source:MGI Symbol;Acc:MGI:1932134]	172.219	144.933	156.627	0.986673	0.24395	4.04457	5.24198e-05	0.00110663				0.176	0.213	0.17	0.488	0.407	0.516	0.543		0.186333	0.4885	2.62165	1.39047
ENSMUSG00000049103	Ccr2	chemokine (C-C motif) receptor 2 [Source:MGI Symbol;Acc:MGI:106185]	37.1623	24.4085	29.8744	1.48756	0.406829	3.65647	0.000255711	0.00385033				0.089	0.06	0.148	0.737	0.369	0.453	0.389		0.099	0.487	4.91919	2.29842
ENSMUSG00000028780	Sema3c	sema domain, immunoglobulin domain (Ig), short basic domain, secreted, (semaphorin) 3C [Source:MGI Symbol;Acc:MGI:107557]	499.53	509.155	505.03	0.682684	0.173454	3.93582	8.29121e-05	0.00159009				0.218	0.271	0.269	0.508	0.463	0.397	0.579		0.252667	0.48675	1.92645	0.945946
ENSMUSG00000063796	Slc22a8	solute carrier family 22 (organic anion transporter), member 8 [Source:MGI Symbol;Acc:MGI:1336187]	73.3767	34.5704	51.2017	1.56714	0.3989	3.92866	8.54196e-05	0.0016318				0.055	0.113	0.084	0.605	0.125	0.653	0.56		0.084	0.48575	5.78274	2.53175
ENSMUSG00000051036	Ttc24	tetratricopeptide repeat domain 24 [Source:MGI Symbol;Acc:MGI:2443841]	26.1282	17.0606	20.9467	1.97615	0.444962	4.44116	8.94748e-06	0.000264746				0.078	0.009	0.054	0.742	0.406	0.412	0.381		0.047	0.48525	10.3245	3.368
ENSMUSG00000040856	Dlk1	delta-like 1 homolog (Drosophila) [Source:MGI Symbol;Acc:MGI:94900]	33.697	19.2703	25.4532	1.87004	0.423903	4.41149	1.0266e-05	0.000298146				0.082	0.081	0.018	0.614	0.434	0.546	0.344		0.0603333	0.4845	8.03039	3.00547
ENSMUSG00000071398	2410004P03Rik	RIKEN cDNA 2410004P03 gene [Source:MGI Symbol;Acc:MGI:1920917]	30.665	12.2023	20.1149	1.72275	0.438946	3.92474	8.68231e-05	0.0016515				0.092	0.037	0.057	0.874	0.294	0.523	0.242		0.062	0.48325	7.79435	2.96243
ENSMUSG00000029445	Hpd	4-hydroxyphenylpyruvic acid dioxygenase [Source:MGI Symbol;Acc:MGI:96213]	29.3878	20.5434	24.3339	2.57467	0.442988	5.81206	6.17091e-09	5.02323e-07				0.047	0.007	0.009	0.563	0.235	0.492	0.641		0.021	0.48275	22.9881	4.52282
ENSMUSG00000003341	Atp8b3	ATPase, class I, type 8B, member 3 [Source:MGI Symbol;Acc:MGI:1914581]	61.5797	30.9436	44.0733	2.5471	0.413558	6.15899	7.3212e-10	7.4986e-08				0.075	0.024	0	0.614	0.321	0.6	0.37		0.033	0.47625	14.4318	3.85118
ENSMUSG00000070972	Dnajc25	DnaJ heat shock protein family (Hsp40) member C25 [Source:MGI Symbol;Acc:MGI:1919679]	80.4333	82.0678	81.3673	1.43161	0.297866	4.80622	1.53812e-06	6.04895e-05				0.133	0.079	0.182	0.526	0.386	0.413	0.577		0.131333	0.4755	3.62056	1.85621
ENSMUSG00000067242	Lgi1	leucine-rich repeat LGI family, member 1 [Source:MGI Symbol;Acc:MGI:1861691]	129.1	120.201	124.015	1.59164	0.259847	6.1253	9.05152e-10	8.8805e-08				0.121	0.07	0.16	0.488	0.339	0.49	0.583		0.117	0.475	4.05983	2.02142
ENSMUSG00000034652	Cd300a	CD300A antigen [Source:MGI Symbol;Acc:MGI:2443411]	46.71	27.9325	35.98	1.67996	0.394163	4.26209	2.02526e-05	0.00052364				0.077	0.074	0.098	0.811	0.449	0.36	0.278		0.083	0.4745	5.71687	2.51522
ENSMUSG00000028749	Pla2g2f	phospholipase A2, group IIF [Source:MGI Symbol;Acc:MGI:1349661]	19.2288	14.8714	16.7389	1.61968	0.451985	3.58349	0.000339035	0.00478422				0.049	0.087	0.04	0.402	0.362	0.551	0.573		0.0586667	0.472	8.04545	3.00817
ENSMUSG00000028386	Slc46a2	solute carrier family 46, member 2 [Source:MGI Symbol;Acc:MGI:1353616]	24.4903	24.7713	24.6509	1.44454	0.434272	3.32634	0.000879948	0.00931995				0.182	0.031	0.058	0.453	0.383	0.48	0.569		0.0903333	0.47125	5.21679	2.38316
ENSMUSG00000056370	Sftpb	surfactant associated protein B [Source:MGI Symbol;Acc:MGI:109516]	26.4237	17.6988	21.438	2.31809	0.447226	5.18326	2.18041e-07	1.13533e-05				0.035	0.032	0.01	0.553	0.273	0.476	0.579		0.0256667	0.47025	18.3214	4.19546
ENSMUSG00000041849	Card6	caspase recruitment domain family, member 6 [Source:MGI Symbol;Acc:MGI:3032959]	44.4745	21.6907	31.4552	1.3666	0.406941	3.35824	0.000784415	0.00858115				0.048	0.136	0.114	0.466	0.401	0.749	0.252		0.0993333	0.467	4.70134	2.23307
ENSMUSG00000027580	Helz2	helicase with zinc finger 2, transcriptional coactivator [Source:MGI Symbol;Acc:MGI:2385169]	47.9981	25.7261	35.2712	1.49222	0.400732	3.72373	0.000196301	0.00314369				0.084	0.134	0.053	0.552	0.271	0.585	0.455		0.0903333	0.46575	5.1559	2.36623
ENSMUSG00000070644	Etnk2	ethanolamine kinase 2 [Source:MGI Symbol;Acc:MGI:2443760]	48.0499	40.5547	43.7669	1.26642	0.355764	3.55971	0.000371266	0.00511135				0.129	0.092	0.171	0.582	0.323	0.43	0.525		0.130667	0.465	3.55867	1.83134
ENSMUSG00000058755	Osm	oncostatin M [Source:MGI Symbol;Acc:MGI:104749]	14.9467	5.6759	9.6491	1.97401	0.47032	4.19716	2.70281e-05	0.000656029				0	0	0	0.456	0.578	0.823	0		0	0.46425	#DIV/0!	#DIV/0!
ENSMUSG00000024935	Slc1a1	solute carrier family 1 (neuronal/epithelial high affinity glutamate transporter, system Xag), member 1 [Source:MGI Symbol;Acc:MGI:105083]	210.333	255.353	236.059	0.848471	0.245594	3.45478	0.000550749	0.00664499				0.319	0.124	0.214	0.586	0.527	0.307	0.435		0.219	0.46375	2.11758	1.08242
ENSMUSG00000003469	Phyhip	phytanoyl-CoA hydroxylase interacting protein [Source:MGI Symbol;Acc:MGI:1860417]	37.7701	20.7313	28.0336	1.41954	0.405136	3.50385	0.000458586	0.00584313				0.091	0.109	0.084	0.489	0.444	0.678	0.239		0.0946667	0.4625	4.88556	2.28852
ENSMUSG00000029999	Tgfa	transforming growth factor alpha [Source:MGI Symbol;Acc:MGI:98724]	193.85	167.614	178.858	2.91713	0.300271	9.71497	2.60318e-22	2.16446e-19				0.039	0.069	0.014	0.684	0.47	0.182	0.491		0.0406667	0.45675	11.2316	3.48949
ENSMUSG00000070034	Sp110	Sp110 nuclear body protein [Source:MGI Symbol;Acc:MGI:1923364]	53.069	46.8259	49.5015	2.21272	0.360351	6.14045	8.22864e-10	8.24677e-08				0.083	0.039	0.048	0.5	0.377	0.407	0.526		0.0566667	0.4525	7.98529	2.99735
ENSMUSG00000038236	Hoxa7	homeobox A7 [Source:MGI Symbol;Acc:MGI:96179]	22.8261	11.4152	16.3056	1.6118	0.458943	3.51197	0.000444791	0.00573003				0.059	0.011	0.091	0.632	0.31	0.581	0.276		0.0536667	0.44975	8.38043	3.06703
ENSMUSG00000028268	Gbp3	guanylate binding protein 3 [Source:MGI Symbol;Acc:MGI:1926263]	33.6107	27.4844	30.11	1.77586	0.400471	4.43442	9.23222e-06	0.000271877				0.072	0.047	0.087	0.387	0.317	0.556	0.531		0.0686667	0.44775	6.52063	2.70501
ENSMUSG00000026208	Des	desmin [Source:MGI Symbol;Acc:MGI:94885]	22.0159	14.3094	17.6122	1.92455	0.4512	4.2654	1.99543e-05	0.000518785				0.052	0.009	0.058	0.509	0.242	0.533	0.493		0.0396667	0.44425	11.1996	3.48537
ENSMUSG00000074653	Lrrc31	leucine rich repeat containing 31 [Source:MGI Symbol;Acc:MGI:2443864]	50.8943	47.6294	49.0286	1.66919	0.362168	4.60888	4.04846e-06	0.000138472				0.066	0.045	0.166	0.498	0.343	0.412	0.522		0.0923333	0.44375	4.80596	2.26482
ENSMUSG00000042096	Dao	D-amino acid oxidase [Source:MGI Symbol;Acc:MGI:94859]	67.0587	30.9201	46.408	2.53825	0.376504	6.74162	1.56632e-11	2.31728e-09				0.067	0.014	0.03	0.587	0.242	0.601	0.339		0.037	0.44225	11.9527	3.57926
ENSMUSG00000058153	Sez6l	seizure related 6 homolog like [Source:MGI Symbol;Acc:MGI:1935121]	458.229	460.507	459.531	0.638913	0.182563	3.49968	0.000465819	0.00590302				0.242	0.177	0.26	0.452	0.416	0.459	0.432		0.226333	0.43975	1.94293	0.958235
ENSMUSG00000071235	Vrtn	vertebrae development associated [Source:MGI Symbol;Acc:MGI:3588197]	38.9755	11.2784	23.1486	1.50027	0.449603	3.33688	0.000847243	0.00908192				0.058	0.134	0	0.618	0.264	0.679	0.195		0.064	0.439	6.85938	2.77808
ENSMUSG00000027661	Slc2a10	solute carrier family 2 (facilitated glucose transporter), member 10 [Source:MGI Symbol;Acc:MGI:2156687]	39.1878	38.7481	38.9366	1.33823	0.376145	3.55776	0.000374031	0.00514183				0.075	0.125	0.13	0.446	0.312	0.349	0.644		0.11	0.43775	3.97955	1.9926
ENSMUSG00000070298	Trcg1	taste receptor cell gene 1 [Source:MGI Symbol;Acc:MGI:3576664]	32.8764	25.9961	28.9448	2.02881	0.408339	4.96846	6.74877e-07	3.00248e-05				0.052	0.058	0.043	0.44	0.393	0.459	0.458		0.051	0.4375	8.57843	3.10071
ENSMUSG00000032737	Inppl1	inositol polyphosphate phosphatase-like 1 [Source:MGI Symbol;Acc:MGI:1333787]	40.7186	33.9724	36.8636	1.37871	0.374437	3.68208	0.000231336	0.00357277				0.128	0.09	0.099	0.495	0.339	0.427	0.483		0.105667	0.436	4.12618	2.04481
ENSMUSG00000025461	Cd163l1	CD163 molecule-like 1 [Source:MGI Symbol;Acc:MGI:2443796]	44.3013	13.4734	26.6854	2.10801	0.436046	4.83438	1.33562e-06	5.4361e-05				0.02	0.054	0.03	0.652	0.34	0.636	0.105		0.0346667	0.43325	12.4976	3.64358
ENSMUSG00000026668	Ucma	upper zone of growth plate and cartilage matrix associated [Source:MGI Symbol;Acc:MGI:1915777]	20.5514	21.316	20.9883	1.71221	0.43488	3.93721	8.24351e-05	0.00158444				0.045	0.048	0.089	0.686	0.356	0.102	0.587		0.0606667	0.43275	7.13324	2.83456
ENSMUSG00000027570	Col9a3	collagen, type IX, alpha 3 [Source:MGI Symbol;Acc:MGI:894686]	57.9955	55.7348	56.7037	1.48929	0.342845	4.34391	1.39969e-05	0.000385971				0.106	0.038	0.18	0.603	0.265	0.291	0.537		0.108	0.424	3.92593	1.97303
ENSMUSG00000050762	Prss27	protease, serine 27 [Source:MGI Symbol;Acc:MGI:2450123]	28.1355	5.09308	14.9684	2.21696	0.467296	4.74424	2.09293e-06	7.89763e-05				0.011	0.01	0.012	0.788	0.28	0.626	0		0.011	0.4235	38.5	5.26679
ENSMUSG00000021367	Edn1	endothelin 1 [Source:MGI Symbol;Acc:MGI:95283]	22.275	7.10833	13.6083	1.61954	0.465232	3.48114	0.000499287	0.00617598				0.039	0.081	0	0.603	0.453	0.6	0		0.04	0.414	10.35	3.37156
ENSMUSG00000050395	Tnfsf15	tumor necrosis factor (ligand) superfamily, member 15 [Source:MGI Symbol;Acc:MGI:2180140]	51.5404	26.721	37.3579	1.90087	0.393355	4.83245	1.34863e-06	5.47709e-05				0.038	0.077	0.053	0.491	0.274	0.535	0.351		0.056	0.41275	7.37054	2.88177
ENSMUSG00000074028	Slc22a13	solute carrier family 22 (organic cation transporter), member 13 [Source:MGI Symbol;Acc:MGI:2143107]	40.2003	26.06	32.1202	2.21698	0.403596	5.49307	3.95009e-08	2.62032e-06				0.064	0.029	0.03	0.494	0.283	0.455	0.407		0.041	0.40975	9.9939	3.32105
ENSMUSG00000026815	Gfi1b	growth factor independent 1B [Source:MGI Symbol;Acc:MGI:1276578]	34.7786	15.3554	23.6796	2.45915	0.450656	5.45681	4.84759e-08	3.06318e-06				0	0.043	0.008	0.503	0.402	0.536	0.18		0.017	0.40525	23.8382	4.57521
ENSMUSG00000028011	Tdo2	tryptophan 2,3-dioxygenase [Source:MGI Symbol;Acc:MGI:1928486]	60.8512	25.7815	40.8113	1.46584	0.372405	3.93615	8.27995e-05	0.00158956				0.108	0.089	0.05	0.479	0.219	0.659	0.26		0.0823333	0.40425	4.90992	2.2957
ENSMUSG00000041540	Sox5	SRY (sex determining region Y)-box 5 [Source:MGI Symbol;Acc:MGI:98367]	2622.43	2616.13	2618.83	0.623292	0.159273	3.91336	9.10189e-05	0.00171251				0.346	0.161	0.173	0.521	0.355	0.354	0.386		0.226667	0.404	1.78235	0.833783
ENSMUSG00000045991	Onecut2	one cut domain, family member 2 [Source:MGI Symbol;Acc:MGI:1891408]	146.913	132.665	138.771	1.1111	0.24367	4.55987	5.11862e-06	0.000167691				0.153	0.12	0.153	0.434	0.33	0.406	0.439		0.142	0.40225	2.83275	1.5022
ENSMUSG00000025172	Ankrd2	ankyrin repeat domain 2 (stretch responsive muscle) [Source:MGI Symbol;Acc:MGI:1861447]	23.5749	11.7059	16.7926	2.17766	0.46151	4.71856	2.37519e-06	8.81992e-05				0.048	0.009	0	0.546	0.189	0.471	0.398		0.019	0.401	21.1053	4.39953
ENSMUSG00000038932	Tcfl5	transcription factor-like 5 (basic helix-loop-helix) [Source:MGI Symbol;Acc:MGI:2672878]	49.0776	39.0905	43.3707	1.61742	0.361181	4.47814	7.52979e-06	0.000229351				0.075	0.082	0.083	0.455	0.312	0.371	0.435		0.08	0.39325	4.91562	2.29737
ENSMUSG00000042607	Asb4	ankyrin repeat and SOCS box-containing 4 [Source:MGI Symbol;Acc:MGI:1929751]	95.0551	99.9505	97.8525	2.49022	0.289814	8.59249	8.5105e-18	4.17485e-15				0.05	0.042	0.052	0.432	0.437	0.271	0.432		0.048	0.393	8.1875	3.03342
ENSMUSG00000035041	Creb3l3	cAMP responsive element binding protein 3-like 3 [Source:MGI Symbol;Acc:MGI:2384786]	38.5052	21.7313	28.9201	1.73413	0.405443	4.27711	1.89332e-05	0.000493614				0.059	0.053	0.066	0.454	0.222	0.521	0.373		0.0593333	0.3925	6.61517	2.72578
ENSMUSG00000030866	Ern2	endoplasmic reticulum (ER) to nucleus signalling 2 [Source:MGI Symbol;Acc:MGI:1349436]	45.4558	21.0057	31.4843	1.91919	0.407538	4.70923	2.4865e-06	9.16023e-05				0.042	0.057	0.047	0.57	0.227	0.457	0.305		0.0486667	0.38975	8.00856	3.00154
ENSMUSG00000001672	Marveld3	MARVEL (membrane-associating) domain containing 3 [Source:MGI Symbol;Acc:MGI:1920858]	32.8942	23.766	27.6781	1.5291	0.448108	3.41235	0.000644046	0.00743845				0.048	0.092	0.02	0.42	0.113	0.368	0.648		0.0533333	0.38725	7.26094	2.86016
ENSMUSG00000060675	Pla2g16	phospholipase A2, group XVI [Source:MGI Symbol;Acc:MGI:2179715]	67.0878	72.5788	70.2255	1.08168	0.305479	3.54093	0.000398724	0.00535491				0.117	0.105	0.172	0.323	0.278	0.389	0.545		0.131333	0.38375	2.92195	1.54693
ENSMUSG00000001665	Gstt3	glutathione S-transferase, theta 3 [Source:MGI Symbol;Acc:MGI:2143526]	14.8177	11.5203	12.9335	1.80759	0.467612	3.86558	0.000110827	0.00199089				0.012	0	0.065	0.349	0.091	0.452	0.619		0.0256667	0.37775	14.7175	3.87946
ENSMUSG00000045667	Smtnl2	smoothelin-like 2 [Source:MGI Symbol;Acc:MGI:2442764]	56.1758	30.9736	41.7745	2.11168	0.383096	5.51215	3.54483e-08	2.37695e-06				0.031	0.048	0.055	0.466	0.312	0.455	0.26		0.0446667	0.37325	8.35634	3.06287
ENSMUSG00000027470	Mylk2	myosin, light polypeptide kinase 2, skeletal muscle [Source:MGI Symbol;Acc:MGI:2139434]	30.4069	13.8194	20.9283	2.1058	0.439087	4.79584	1.61991e-06	6.32728e-05				0.052	0.026	0.016	0.704	0.284	0.292	0.212		0.0313333	0.373	11.9043	3.57341
ENSMUSG00000025955	Akr1cl	aldo-keto reductase family 1, member C-like [Source:MGI Symbol;Acc:MGI:1918111]	54.6502	30.7814	41.0109	1.22506	0.364791	3.35824	0.000784396	0.00858115				0.133	0.062	0.095	0.426	0.147	0.566	0.349		0.0966667	0.372	3.84828	1.94421
ENSMUSG00000026271	Gpr35	G protein-coupled receptor 35 [Source:MGI Symbol;Acc:MGI:1929509]	93.6158	50.7546	69.1237	1.65635	0.337853	4.90256	9.45936e-07	4.00833e-05				0.078	0.041	0.102	0.498	0.268	0.488	0.223		0.0736667	0.36925	5.01244	2.32551
ENSMUSG00000057286	St6galnac2	ST6 (alpha-N-acetyl-neuraminyl-2,3-beta-galactosyl-1,3)-N-acetylgalactosaminide alpha-2,6-sialyltransferase 2 [Source:MGI Symbol;Acc:MGI:107553]	47.8108	30.2467	37.7742	1.61099	0.390084	4.12986	3.62988e-05	0.000826186				0.097	0.079	0.029	0.429	0.258	0.431	0.358		0.0683333	0.369	5.4	2.43296
ENSMUSG00000020828	Pld2	phospholipase D2 [Source:MGI Symbol;Acc:MGI:892877]	42.9152	30.06	35.5694	1.4541	0.380633	3.82023	0.000133327	0.00232276				0.076	0.052	0.111	0.341	0.242	0.528	0.363		0.0796667	0.3685	4.62552	2.20962
ENSMUSG00000020911	Krt19	keratin 19 [Source:MGI Symbol;Acc:MGI:96693]	19.8028	8.29397	13.2263	1.96772	0.468951	4.196	2.71667e-05	0.00065768				0	0.03	0.012	0.267	0.194	0.685	0.316		0.014	0.3655	26.1071	4.70637
ENSMUSG00000041237	Pklr	pyruvate kinase liver and red blood cell [Source:MGI Symbol;Acc:MGI:97604]	26.0794	12.8051	18.4941	2.01388	0.452948	4.44616	8.74206e-06	0.000260321				0.041	0.007	0.036	0.465	0.286	0.494	0.212		0.028	0.36425	13.0089	3.70143
ENSMUSG00000046618	Olfml2a	olfactomedin-like 2A [Source:MGI Symbol;Acc:MGI:2444741]	92.5681	23.7573	53.2476	2.98866	0.397049	7.5272	5.18403e-14	1.38051e-11				0.011	0.027	0.009	0.614	0.218	0.504	0.121		0.0156667	0.36425	23.25	4.53916
ENSMUSG00000074109	Mrgprx2	MAS-related GPR, member X2 [Source:MGI Symbol;Acc:MGI:3588270]	40.9174	44.567	43.0029	1.25053	0.36646	3.41245	0.000643814	0.00743845				0.142	0.112	0.06	0.391	0.436	0.242	0.382		0.104667	0.36275	3.46576	1.79317
ENSMUSG00000047797	Gjb1	gap junction protein, beta 1 [Source:MGI Symbol;Acc:MGI:95719]	24.2944	7.70071	14.8123	2.62684	0.469149	5.59917	2.15384e-08	1.52661e-06				0	0	0	0.795	0.257	0.251	0.146		0	0.36225	#DIV/0!	#DIV/0!
ENSMUSG00000024673	Ms4a1	membrane-spanning 4-domains, subfamily A, member 1 [Source:MGI Symbol;Acc:MGI:88321]	39.8303	27.0378	32.5203	1.32287	0.390914	3.38405	0.000714256	0.00801705				0.073	0.08	0.11	0.462	0.253	0.384	0.341		0.0876667	0.36	4.10646	2.0379
ENSMUSG00000032268	Tmprss5	transmembrane protease, serine 5 (spinesin) [Source:MGI Symbol;Acc:MGI:1933407]	61.2609	68.4637	65.3768	2.23529	0.363998	6.14095	8.20293e-10	8.24677e-08				0.076	0.011	0.055	0.516	0.364	0.141	0.41		0.0473333	0.35775	7.5581	2.91802
ENSMUSG00000071713	Csf2rb	colony stimulating factor 2 receptor, beta, low-affinity (granulocyte-macrophage) [Source:MGI Symbol;Acc:MGI:1339759]	51.9186	36.3262	43.0087	2.34211	0.374634	6.25172	4.05948e-10	4.37415e-08				0.041	0.028	0.038	0.438	0.198	0.347	0.434		0.0356667	0.35425	9.93224	3.31212
ENSMUSG00000033453	Adamts15	a disintegrin-like and metallopeptidase (reprolysin type) with thrombospondin type 1 motif, 15 [Source:MGI Symbol;Acc:MGI:2449569]	54.783	29.098	40.1058	2.31271	0.39055	5.92168	3.18677e-09	2.82879e-07				0.037	0.023	0.041	0.431	0.322	0.467	0.194		0.0336667	0.3535	10.5	3.39232
ENSMUSG00000067596	Krt74	keratin 74 [Source:MGI Symbol;Acc:MGI:3629975]	18.8407	12.3073	15.1073	1.93785	0.466612	4.15301	3.28129e-05	0.000763627				0.037	0.017	0	0.373	0.093	0.41	0.538		0.018	0.3535	19.6389	4.29564
ENSMUSG00000059022	Kcp	kielin/chordin-like protein [Source:MGI Symbol;Acc:MGI:2141640]	98.3073	32.6128	60.7676	1.96081	0.358127	5.47517	4.37092e-08	2.8096e-06				0.047	0.047	0.049	0.604	0.167	0.453	0.182		0.0476667	0.3515	7.37413	2.88247
ENSMUSG00000022683	Pla2g10	phospholipase A2, group X [Source:MGI Symbol;Acc:MGI:1347522]	32.0996	27.8544	29.6738	1.41656	0.403001	3.51503	0.000439706	0.00569206				0.038	0.058	0.126	0.264	0.161	0.453	0.525		0.074	0.35075	4.73986	2.24485
ENSMUSG00000028893	Sesn2	sestrin 2 [Source:MGI Symbol;Acc:MGI:2651874]	43.6569	28.7264	35.1252	1.34466	0.381114	3.52823	0.000418352	0.0055152				0.093	0.067	0.083	0.292	0.288	0.549	0.269		0.081	0.3495	4.31481	2.1093
ENSMUSG00000049871	Nlrc3	NLR family, CARD domain containing 3 [Source:MGI Symbol;Acc:MGI:2444070]	57.5488	58.9571	58.3535	1.69565	0.33352	5.08411	3.69354e-07	1.76996e-05				0.057	0.061	0.094	0.361	0.226	0.278	0.529		0.0706667	0.3485	4.9316	2.30206
ENSMUSG00000041515	Irf8	interferon regulatory factor 8 [Source:MGI Symbol;Acc:MGI:96395]	46.1663	29.4865	36.635	1.71495	0.383277	4.47443	7.66146e-06	0.000232223				0.051	0.05	0.08	0.398	0.262	0.433	0.3		0.0603333	0.34825	5.7721	2.5291
ENSMUSG00000020264	Slc36a2	solute carrier family 36 (proton/amino acid symporter), member 2 [Source:MGI Symbol;Acc:MGI:1891430]	54.6893	45.313	49.3314	1.57614	0.38468	4.09726	4.18065e-05	0.000925552				0.042	0.032	0.151	0.445	0.307	0.326	0.306		0.075	0.346	4.61333	2.20581
ENSMUSG00000024109	Nrxn1	neurexin I [Source:MGI Symbol;Acc:MGI:1096391]	2629.04	2546.86	2582.08	0.493106	0.141128	3.49404	0.000475773	0.00600873				0.288	0.194	0.158	0.458	0.354	0.266	0.303		0.213333	0.34525	1.61836	0.694532
ENSMUSG00000000753	Serpinf1	serine (or cysteine) peptidase inhibitor, clade F, member 1 [Source:MGI Symbol;Acc:MGI:108080]	25.4574	17.8564	21.114	2.16039	0.44067	4.90253	9.46122e-07	4.00833e-05				0.047	0.012	0.022	0.452	0.221	0.312	0.384		0.027	0.34225	12.6759	3.66402
ENSMUSG00000035125	Gcfc2	GC-rich sequence DNA binding factor 2 [Source:MGI Symbol;Acc:MGI:2141656]	81.9844	67.5794	73.753	1.00626	0.3042	3.30788	0.000940045	0.0097244				0.138	0.083	0.15	0.385	0.27	0.398	0.312		0.123667	0.34125	2.75943	1.46437
ENSMUSG00000092035	Peg10	paternally expressed 10 [Source:MGI Symbol;Acc:MGI:2157785]	29.7094	19.0901	23.6412	1.43493	0.422557	3.39581	0.000684255	0.00777282				0.065	0.076	0.058	0.522	0.245	0.268	0.325		0.0663333	0.34	5.12563	2.35773
ENSMUSG00000033409	Syce1l	synaptonemal complex central element protein 1 like [Source:MGI Symbol;Acc:MGI:1922247]	25.9266	15.4885	19.962	2.00916	0.441314	4.55268	5.29677e-06	0.000172316				0.042	0.025	0.023	0.402	0.216	0.397	0.33		0.03	0.33625	11.2083	3.4865
ENSMUSG00000016995	Matn4	matrilin 4 [Source:MGI Symbol;Acc:MGI:1328314]	35.2757	20.8924	27.0567	1.66671	0.422782	3.94224	8.07248e-05	0.00156261				0.038	0.034	0.085	0.428	0.29	0.411	0.215		0.0523333	0.336	6.42038	2.68266
ENSMUSG00000000731	Aire	autoimmune regulator (autoimmune polyendocrinopathy candidiasis ectodermal dystrophy) [Source:MGI Symbol;Acc:MGI:1338803]	33.4193	15.8065	23.3548	1.53716	0.432372	3.55518	0.000377722	0.00516986				0.044	0.086	0.035	0.574	0.245	0.288	0.233		0.055	0.335	6.09091	2.60666
ENSMUSG00000045775	Slc16a5	solute carrier family 16 (monocarboxylic acid transporters), member 5 [Source:MGI Symbol;Acc:MGI:2443515]	23.7039	15.9727	19.2861	1.91324	0.456191	4.19395	2.74141e-05	0.00066281				0.072	0.006	0.008	0.377	0.279	0.4	0.284		0.0286667	0.335	11.686	3.54672
ENSMUSG00000005465	Il27ra	interleukin 27 receptor, alpha [Source:MGI Symbol;Acc:MGI:1355318]	25.4265	17.6353	20.9744	1.63354	0.431128	3.78898	0.000151264	0.00257274				0.056	0.057	0.039	0.354	0.333	0.388	0.257		0.0506667	0.333	6.57237	2.71641
ENSMUSG00000038224	Serpinf2	serine (or cysteine) peptidase inhibitor, clade F, member 2 [Source:MGI Symbol;Acc:MGI:107173]	15.9848	9.7546	12.4247	1.7557	0.468514	3.74739	0.000178681	0.00292432				0	0.03	0.036	0.248	0.254	0.513	0.316		0.022	0.33275	15.125	3.91886
ENSMUSG00000006784	Ttc25	tetratricopeptide repeat domain 25 [Source:MGI Symbol;Acc:MGI:1921657]	58.4631	39.1709	47.439	1.64862	0.359199	4.5897	4.43874e-06	0.000148818				0.048	0.063	0.085	0.378	0.282	0.394	0.276		0.0653333	0.3325	5.08929	2.34746
ENSMUSG00000040061	Plcb2	phospholipase C, beta 2 [Source:MGI Symbol;Acc:MGI:107465]	45.2814	31.6697	37.5033	1.36266	0.400298	3.40411	0.000663798	0.00760532				0.144	0.063	0.023	0.344	0.227	0.426	0.324		0.0766667	0.33025	4.30761	2.10689
ENSMUSG00000070687	Htr1d	5-hydroxytryptamine (serotonin) receptor 1D [Source:MGI Symbol;Acc:MGI:96276]	47.6335	24.2361	34.2636	1.93458	0.407419	4.74837	2.05062e-06	7.75368e-05				0.054	0.022	0.05	0.482	0.301	0.392	0.141		0.042	0.329	7.83333	2.96963
ENSMUSG00000020641	Rsad2	radical S-adenosyl methionine domain containing 2 [Source:MGI Symbol;Acc:MGI:1929628]	27.4338	21.3215	23.9411	1.3864	0.416946	3.32514	0.000883727	0.00934935				0.063	0.051	0.091	0.285	0.229	0.437	0.363		0.0683333	0.3285	4.80732	2.26523
ENSMUSG00000035355	Kcnh4	potassium voltage-gated channel, subfamily H (eag-related), member 4 [Source:MGI Symbol;Acc:MGI:2156184]	41.0343	21.6886	29.9796	2.6195	0.416692	6.28642	3.2488e-10	3.60482e-08				0.026	0.012	0.02	0.452	0.185	0.362	0.312		0.0193333	0.32775	16.9526	4.08343
ENSMUSG00000024087	Cyp1b1	cytochrome P450, family 1, subfamily b, polypeptide 1 [Source:MGI Symbol;Acc:MGI:88590]	22.9997	4.05657	12.1751	1.69918	0.470653	3.61026	0.000305891	0.00440659				0.021	0	0.035	0.612	0.071	0.514	0.112		0.0186667	0.32725	17.5312	4.13186
ENSMUSG00000043110	Lrrn4	leucine rich repeat neuronal 4 [Source:MGI Symbol;Acc:MGI:2445154]	20.5766	19.4268	19.9196	2.08963	0.442619	4.72106	2.34622e-06	8.72972e-05				0.021	0.037	0.023	0.286	0.332	0.311	0.377		0.027	0.3265	12.0926	3.59605
ENSMUSG00000001506	Col1a1	collagen, type I, alpha 1 [Source:MGI Symbol;Acc:MGI:88467]	33.1456	22.9904	27.3427	1.87783	0.415542	4.51898	6.21369e-06	0.000195358				0.067	0.032	0.028	0.41	0.192	0.327	0.376		0.0423333	0.32625	7.70669	2.94611
ENSMUSG00000052212	Cd177	CD177 antigen [Source:MGI Symbol;Acc:MGI:1916141]	29.96	24.1466	26.6381	1.84212	0.424473	4.33979	1.42617e-05	0.000391534				0.016	0.033	0.082	0.368	0.233	0.314	0.387		0.0436667	0.3255	7.4542	2.89805
ENSMUSG00000034584	Exph5	exophilin 5 [Source:MGI Symbol;Acc:MGI:2443248]	162.306	95.1628	123.938	2.1932	0.306975	7.14458	9.02746e-13	1.73485e-10				0.04	0.018	0.076	0.307	0.238	0.512	0.244		0.0446667	0.32525	7.28172	2.86428
ENSMUSG00000062760	1810041L15Rik	RIKEN cDNA 1810041L15 gene [Source:MGI Symbol;Acc:MGI:1919551]	130.902	106.286	116.836	1.84093	0.278425	6.61196	3.79265e-11	5.3157e-09				0.1	0.054	0.045	0.449	0.235	0.245	0.369		0.0663333	0.3245	4.89196	2.29041
ENSMUSG00000024857	Cabp2	calcium binding protein 2 [Source:MGI Symbol;Acc:MGI:1352749]	10.6906	6.81267	8.47466	1.60569	0.471249	3.40731	0.000656074	0.00754931				0.015	0.013	0.017	0.573	0.198	0.148	0.353		0.015	0.318	21.2	4.40599
ENSMUSG00000049555	Tmie	transmembrane inner ear [Source:MGI Symbol;Acc:MGI:2159400]	35.9163	11.0088	21.6834	1.89651	0.45616	4.15754	3.21686e-05	0.000753336				0.006	0.048	0.02	0.542	0.158	0.382	0.188		0.0246667	0.3175	12.8716	3.68612
ENSMUSG00000004359	Spic	Spi-C transcription factor (Spi-1/PU.1 related) [Source:MGI Symbol;Acc:MGI:1341168]	23.2682	9.64413	15.483	1.85803	0.460647	4.03352	5.49483e-05	0.00114446				0.059	0.008	0.009	0.41	0.204	0.477	0.176		0.0253333	0.31675	12.5033	3.64424
ENSMUSG00000034000	Neu4	sialidase 4 [Source:MGI Symbol;Acc:MGI:2661364]	14.9954	9.73843	11.9914	1.56242	0.470488	3.32085	0.000897445	0.00943026				0.022	0	0.061	0.476	0.253	0.279	0.258		0.0276667	0.3165	11.4398	3.51598
ENSMUSG00000027412	Lpin3	lipin 3 [Source:MGI Symbol;Acc:MGI:1891342]	48.1172	33.9505	40.022	1.96482	0.373966	5.25401	1.48821e-07	8.15934e-06				0.065	0.031	0.042	0.403	0.218	0.309	0.321		0.046	0.31275	6.79891	2.7653
ENSMUSG00000044005	Gls2	glutaminase 2 (liver, mitochondrial) [Source:MGI Symbol;Acc:MGI:2143539]	29.571	19.3781	23.7465	1.92348	0.426206	4.51303	6.39087e-06	0.000199886				0.044	0.025	0.037	0.309	0.269	0.409	0.247		0.0353333	0.3085	8.73113	3.12617
ENSMUSG00000012889	Podnl1	podocan-like 1 [Source:MGI Symbol;Acc:MGI:2685352]	16.8905	3.5382	9.26062	1.65627	0.471338	3.51397	0.000441455	0.00570242				0.013	0.012	0.015	0.482	0.16	0.523	0.069		0.0133333	0.3085	23.1375	4.53216
ENSMUSG00000038567	Cyp24a1	cytochrome P450, family 24, subfamily a, polypeptide 1 [Source:MGI Symbol;Acc:MGI:88593]	27.2194	16.9291	21.3392	2.05611	0.440838	4.66409	3.09993e-06	0.000110068				0.018	0.011	0.053	0.333	0.158	0.398	0.344		0.0273333	0.30825	11.2774	3.49537
ENSMUSG00000068697	Myoz1	myozenin 1 [Source:MGI Symbol;Acc:MGI:1929471]	10.4515	10.4717	10.4631	1.92446	0.471412	4.08233	4.45866e-05	0.000978018				0.012	0.01	0	0.262	0.205	0.279	0.486		0.00733333	0.308	42	5.39232
ENSMUSG00000018727	Cpsf4l	cleavage and polyadenylation specific factor 4-like [Source:MGI Symbol;Acc:MGI:1277182]	22.5506	13.4368	17.3427	1.7853	0.461601	3.86762	0.000109902	0.00198196				0.051	0.026	0	0.367	0.145	0.351	0.362		0.0256667	0.30625	11.9318	3.57674
ENSMUSG00000038805	Six3	sine oculis-related homeobox 3 [Source:MGI Symbol;Acc:MGI:102764]	34.9626	15.2059	23.6731	1.74805	0.433252	4.03472	5.46686e-05	0.00114027				0.027	0.035	0.055	0.43	0.206	0.405	0.173		0.039	0.3035	7.78205	2.96015
ENSMUSG00000046794	Ppp1r3b	protein phosphatase 1, regulatory (inhibitor) subunit 3B [Source:MGI Symbol;Acc:MGI:2177268]	17.5605	18.8952	18.3232	1.85883	0.446267	4.1653	3.10948e-05	0.000733719				0.014	0.025	0.054	0.17	0.192	0.355	0.493		0.031	0.3025	9.75806	3.2866
ENSMUSG00000020447	Npc1l1	NPC1-like 1 [Source:MGI Symbol;Acc:MGI:2685089]	34.8057	26.8654	30.2684	1.53694	0.397581	3.86574	0.000110751	0.00199089				0.05	0.036	0.09	0.306	0.149	0.364	0.39		0.0586667	0.30225	5.15199	2.36513
ENSMUSG00000027249	F2	coagulation factor II [Source:MGI Symbol;Acc:MGI:88380]	21.9609	11.4151	15.9347	1.88293	0.458033	4.1109	3.94125e-05	0.000879865				0.031	0.007	0.034	0.297	0.206	0.474	0.224		0.024	0.30025	12.5104	3.64506
ENSMUSG00000042254	Cilp	cartilage intermediate layer protein, nucleotide pyrophosphohydrolase [Source:MGI Symbol;Acc:MGI:2444507]	34.6901	14.5645	23.1897	1.68742	0.433029	3.89678	9.74789e-05	0.00180627				0.062	0.025	0.037	0.428	0.253	0.428	0.088		0.0413333	0.29925	7.23992	2.85597
ENSMUSG00000015242	Nipsnap3a	nipsnap homolog 3A (C. elegans) [Source:MGI Symbol;Acc:MGI:1920648]	16.38	19.1864	17.9836	1.49674	0.443341	3.37605	0.000735334	0.00818839				0.036	0.033	0.072	0.202	0.152	0.298	0.532		0.047	0.296	6.29787	2.65486
ENSMUSG00000034427	Myo15b	myosin XVB [Source:MGI Symbol;Acc:MGI:2685534]	76.5324	26.1975	47.7696	2.60261	0.37974	6.85365	7.199e-12	1.18758e-09				0.025	0.02	0.02	0.513	0.189	0.347	0.132		0.0216667	0.29525	13.6269	3.76839
ENSMUSG00000062563	Cys1	cystin 1 [Source:MGI Symbol;Acc:MGI:2177632]	30.1024	15.9162	21.996	2.40357	0.441172	5.44814	5.08987e-08	3.20542e-06				0.016	0.015	0.018	0.366	0.262	0.36	0.184		0.0163333	0.293	17.9388	4.16501
ENSMUSG00000046280	She	src homology 2 domain-containing transforming protein E [Source:MGI Symbol;Acc:MGI:1099462]	45.2438	38.3143	41.2841	1.79234	0.376503	4.76051	1.93107e-06	7.34634e-05				0.066	0.039	0.038	0.273	0.201	0.325	0.37		0.0476667	0.29225	6.13112	2.61615
ENSMUSG00000017861	Mybl2	myeloblastosis oncogene-like 2 [Source:MGI Symbol;Acc:MGI:101785]	60.124	33.6033	44.9693	1.66005	0.361975	4.58608	4.51654e-06	0.000151154				0.055	0.052	0.054	0.365	0.171	0.358	0.256		0.0536667	0.2875	5.35714	2.42146
ENSMUSG00000030825	Hsd17b14	hydroxysteroid (17-beta) dehydrogenase 14 [Source:MGI Symbol;Acc:MGI:1913315]	26.1315	9.87718	16.8433	2.00292	0.457746	4.37562	1.21089e-05	0.000339941				0.021	0.038	0	0.46	0.284	0.325	0.073		0.0196667	0.2855	14.5169	3.85967
ENSMUSG00000032076	Cadm1	cell adhesion molecule 1 [Source:MGI Symbol;Acc:MGI:1889272]	605.832	641.69	626.322	0.727535	0.211318	3.44284	0.000575636	0.00686968				0.259	0.114	0.086	0.354	0.287	0.228	0.27		0.153	0.28475	1.86111	0.896164
ENSMUSG00000020891	Alox8	arachidonate 8-lipoxygenase [Source:MGI Symbol;Acc:MGI:1098228]	18.145	18.9382	18.5982	2.1048	0.464757	4.52882	5.9313e-06	0.000188357				0.025	0	0.014	0.108	0.314	0.404	0.309		0.013	0.28375	21.8269	4.44804
ENSMUSG00000018166	Erbb3	erb-b2 receptor tyrosine kinase 3 [Source:MGI Symbol;Acc:MGI:95411]	39.7624	29.1818	33.7163	1.40981	0.402044	3.50661	0.000453857	0.00581068				0.058	0.025	0.112	0.42	0.206	0.26	0.245		0.065	0.28275	4.35	2.12102
ENSMUSG00000024650	Slc22a6	solute carrier family 22 (organic anion transporter), member 6 [Source:MGI Symbol;Acc:MGI:892001]	18.3476	9.92014	13.5319	2.0143	0.466097	4.32164	1.54872e-05	0.000419009				0.008	0.023	0.009	0.379	0.212	0.297	0.241		0.0133333	0.28225	21.1687	4.40386
ENSMUSG00000029204	Rhoh	ras homolog gene family, member H [Source:MGI Symbol;Acc:MGI:1921984]	58.1371	42.3698	49.1272	2.38002	0.359641	6.61776	3.64679e-11	5.14999e-09				0.029	0.026	0.035	0.359	0.228	0.255	0.286		0.03	0.282	9.4	3.23266
ENSMUSG00000057948	Unc13d	unc-13 homolog D (C. elegans) [Source:MGI Symbol;Acc:MGI:1917700]	29.3941	16.4787	22.0138	1.69547	0.457477	3.70612	0.000210455	0.00331343				0.027	0.005	0.06	0.34	0.3	0.385	0.1		0.0306667	0.28125	9.1712	3.19711
ENSMUSG00000070385	Ampd1	adenosine monophosphate deaminase 1 [Source:MGI Symbol;Acc:MGI:88015]	41.3164	34.7289	37.5521	1.69365	0.377333	4.48847	7.17356e-06	0.0002203				0.057	0.03	0.067	0.286	0.2	0.309	0.325		0.0513333	0.28	5.45455	2.44746
ENSMUSG00000021950	Anxa8	annexin A8 [Source:MGI Symbol;Acc:MGI:1201374]	24.6431	15.3689	19.3436	2.12775	0.44732	4.75666	1.96825e-06	7.47254e-05				0.03	0.005	0.026	0.308	0.15	0.352	0.31		0.0203333	0.28	13.7705	3.78351
ENSMUSG00000060560	Ces4a	carboxylesterase 4A [Source:MGI Symbol;Acc:MGI:2384581]	34.3674	18.601	25.358	1.67984	0.448651	3.7442	0.000180968	0.00295915				0.047	0	0.063	0.451	0.197	0.294	0.173		0.0366667	0.27875	7.60227	2.92643
ENSMUSG00000001986	Gria3	glutamate receptor, ionotropic, AMPA3 (alpha 3) [Source:MGI Symbol;Acc:MGI:95810]	513.904	506.167	509.483	0.724161	0.169933	4.26146	2.03096e-05	0.00052364				0.148	0.132	0.142	0.329	0.29	0.228	0.267		0.140667	0.2785	1.97986	0.985397
ENSMUSG00000026922	Agpat2	1-acylglycerol-3-phosphate O-acyltransferase 2 (lysophosphatidic acid acyltransferase, beta) [Source:MGI Symbol;Acc:MGI:1914762]	11.2784	18.2929	15.2867	1.90767	0.462299	4.12648	3.68353e-05	0.000833309				0	0.014	0.05	0.158	0.301	0.215	0.437		0.0213333	0.27775	13.0195	3.70261
ENSMUSG00000042286	Stab1	stabilin 1 [Source:MGI Symbol;Acc:MGI:2178742]	43.5692	36.1009	39.3016	2.48641	0.392504	6.33473	2.37758e-10	2.71905e-08				0.017	0.026	0.023	0.253	0.18	0.293	0.381		0.022	0.27675	12.5795	3.65301
ENSMUSG00000029859	Epha1	Eph receptor A1 [Source:MGI Symbol;Acc:MGI:107381]	20.4071	20.2191	20.2997	1.76789	0.437694	4.03911	5.36554e-05	0.00112507				0.029	0.042	0.032	0.284	0.225	0.207	0.382		0.0343333	0.2745	7.99515	2.99912
ENSMUSG00000012282	Wnt8a	wingless-type MMTV integration site family, member 8A [Source:MGI Symbol;Acc:MGI:107924]	13.5528	2.26322	7.10163	1.61789	0.463834	3.48808	0.000486508	0.00609885				0	0	0	0.68	0.144	0.226	0.038		0	0.272	#DIV/0!	#DIV/0!
ENSMUSG00000055933	Oosp3	oocyte secreted protein 3 [Source:MGI Symbol;Acc:MGI:2684943]	24.3438	17.6903	20.5418	1.62155	0.435883	3.72015	0.000199102	0.00317862				0.058	0.037	0.026	0.253	0.244	0.346	0.244		0.0403333	0.27175	6.7376	2.75224
ENSMUSG00000021403	Serpinb9b	serine (or cysteine) peptidase inhibitor, clade B, member 9b [Source:MGI Symbol;Acc:MGI:894668]	21.5054	17.6872	19.3235	1.73287	0.445204	3.89231	9.92927e-05	0.00182897				0.012	0.027	0.059	0.238	0.125	0.313	0.406		0.0326667	0.2705	8.28061	3.04974
ENSMUSG00000036856	Wnt4	wingless-type MMTV integration site family, member 4 [Source:MGI Symbol;Acc:MGI:98957]	49.587	16.5257	30.6948	1.51624	0.426377	3.5561	0.000376399	0.00516675				0.035	0.042	0.056	0.425	0.192	0.401	0.061		0.0443333	0.26975	6.08459	2.60516
ENSMUSG00000013936	Myl2	myosin, light polypeptide 2, regulatory, cardiac, slow [Source:MGI Symbol;Acc:MGI:97272]	16.5641	16.7545	16.6729	1.69756	0.449906	3.77313	0.000161211	0.00270978				0.034	0.031	0.031	0.228	0.243	0.254	0.343		0.032	0.267	8.34375	3.0607
ENSMUSG00000018604	Tbx3	T-box 3 [Source:MGI Symbol;Acc:MGI:98495]	22.1386	14.8708	17.9856	1.92467	0.455317	4.2271	2.36718e-05	0.000593631				0.049	0.006	0.014	0.32	0.25	0.296	0.193		0.023	0.26475	11.5109	3.52492
ENSMUSG00000057003	Myh4	myosin, heavy polypeptide 4, skeletal muscle [Source:MGI Symbol;Acc:MGI:1339713]	42.5709	18.3466	28.7284	2.13632	0.417576	5.11601	3.12068e-07	1.53896e-05				0.015	0.031	0.026	0.254	0.182	0.452	0.171		0.024	0.26475	11.0312	3.46352
ENSMUSG00000000244	Tspan32	tetraspanin 32 [Source:MGI Symbol;Acc:MGI:1350360]	25.8217	15.1084	19.6998	1.4892	0.442492	3.36548	0.000764109	0.00843825				0.041	0.058	0.026	0.329	0.156	0.293	0.279		0.0416667	0.26425	6.342	2.66494
ENSMUSG00000043747	1520401A03Rik	RIKEN cDNA 1520401A03 gene [Source:MGI Symbol;Acc:MGI:2443785]	26.8044	23.18	24.7333	1.62535	0.422607	3.846	0.00012006	0.00213349				0.057	0.017	0.057	0.262	0.198	0.294	0.296		0.0436667	0.2625	6.01145	2.58771
ENSMUSG00000015053	Gata2	GATA binding protein 2 [Source:MGI Symbol;Acc:MGI:95662]	26.5932	8.56377	16.2907	1.87967	0.455911	4.12289	3.74144e-05	0.00084232				0.046	0.012	0.007	0.365	0.152	0.418	0.103		0.0216667	0.2595	11.9769	3.58219
ENSMUSG00000045467	Ttll13	tubulin tyrosine ligase-like family, member 13 [Source:MGI Symbol;Acc:MGI:1920845]	21.6894	15.6214	18.222	1.79922	0.445942	4.03464	5.46858e-05	0.00114027				0.024	0.027	0.033	0.27	0.145	0.288	0.328		0.028	0.25775	9.20536	3.20247
ENSMUSG00000032401	Lctl	lactase-like [Source:MGI Symbol;Acc:MGI:2183549]	33.0166	24.6156	28.216	1.51987	0.416806	3.64647	0.000265867	0.00394903				0.029	0.026	0.096	0.351	0.168	0.239	0.269		0.0503333	0.25675	5.10099	2.35078
ENSMUSG00000068699	Flnc	filamin C, gamma [Source:MGI Symbol;Acc:MGI:95557]	51.8491	32.3355	40.6985	1.31604	0.371364	3.54381	0.000394386	0.0053158				0.081	0.054	0.063	0.424	0.239	0.222	0.142		0.066	0.25675	3.89015	1.95983
ENSMUSG00000089844	A530032D15Rik	RIKEN cDNA A530032D15Rik gene [Source:MGI Symbol;Acc:MGI:3037746]	35.7824	36.4894	36.1864	1.53052	0.38359	3.98999	6.60759e-05	0.00133015				0.064	0.035	0.057	0.207	0.181	0.274	0.354		0.052	0.254	4.88462	2.28824
ENSMUSG00000025504	Eps8l2	EPS8-like 2 [Source:MGI Symbol;Acc:MGI:2138828]	39.2165	21.4591	29.0694	2.31779	0.43177	5.36811	7.95656e-08	4.63495e-06				0.004	0.022	0.028	0.298	0.169	0.314	0.234		0.018	0.25375	14.0972	3.81734
ENSMUSG00000048230	Fbxo43	F-box protein 43 [Source:MGI Symbol;Acc:MGI:1926053]	25.5793	13.6925	18.7868	1.58933	0.444103	3.57875	0.000345242	0.00484978				0.023	0.031	0.052	0.293	0.128	0.346	0.244		0.0353333	0.25275	7.1533	2.83861
ENSMUSG00000074604	Mgst2	microsomal glutathione S-transferase 2 [Source:MGI Symbol;Acc:MGI:2448481]	44.6177	16.44	28.5162	1.68777	0.408842	4.12817	3.6567e-05	0.000829251				0.054	0.049	0.013	0.336	0.187	0.389	0.091		0.0386667	0.25075	6.48491	2.69709
ENSMUSG00000076434	Wfdc3	WAP four-disulfide core domain 3 [Source:MGI Symbol;Acc:MGI:1923897]	22.2312	14.9384	18.0639	1.74832	0.445021	3.92861	8.54373e-05	0.0016318				0.029	0.021	0.039	0.346	0.148	0.224	0.276		0.0296667	0.2485	8.3764	3.06633
ENSMUSG00000015619	Gata3	GATA binding protein 3 [Source:MGI Symbol;Acc:MGI:95663]	47.458	36.5578	41.2293	1.88318	0.386078	4.87773	1.07311e-06	4.49526e-05				0.047	0.012	0.052	0.218	0.179	0.334	0.254		0.037	0.24625	6.65541	2.73453
ENSMUSG00000065999	Gm13154	predicted gene 13154 [Source:MGI Symbol;Acc:MGI:3651986]	54.0835	35.8885	43.6864	1.21397	0.357591	3.39485	0.000686664	0.00779069				0.065	0.066	0.075	0.291	0.179	0.291	0.212		0.0686667	0.24325	3.54248	1.82476
ENSMUSG00000023978	Prph2	peripherin 2 [Source:MGI Symbol;Acc:MGI:102791]	24.7825	9.39817	15.9915	2.32806	0.462288	5.03596	4.75456e-07	2.2213e-05				0.012	0.011	0	0.29	0.177	0.372	0.125		0.00766667	0.241	31.4348	4.97429
ENSMUSG00000028789	Azin2	antizyme inhibitor 2 [Source:MGI Symbol;Acc:MGI:2442093]	51.4966	30.7667	39.6509	1.76831	0.371868	4.75521	1.9824e-06	7.51097e-05				0.056	0.036	0.03	0.307	0.186	0.277	0.182		0.0406667	0.238	5.85246	2.54904
ENSMUSG00000006344	Ggt5	gamma-glutamyltransferase 5 [Source:MGI Symbol;Acc:MGI:1346063]	46.8341	22.6859	33.0351	1.87771	0.408759	4.59368	4.355e-06	0.000146802				0.025	0.047	0.021	0.312	0.147	0.29	0.203		0.031	0.238	7.67742	2.94062
ENSMUSG00000027071	P2rx3	purinergic receptor P2X, ligand-gated ion channel, 3 [Source:MGI Symbol;Acc:MGI:1097160]	55.2678	46.2886	50.1368	1.49699	0.352568	4.24596	2.17656e-05	0.000555799				0.053	0.034	0.081	0.282	0.203	0.236	0.227		0.056	0.237	4.23214	2.08139
ENSMUSG00000028755	Cda	cytidine deaminase [Source:MGI Symbol;Acc:MGI:1919519]	40.1064	27.1737	32.7162	2.6414	0.420403	6.28301	3.32077e-10	3.66286e-08				0.018	0	0.026	0.365	0.125	0.174	0.283		0.0146667	0.23675	16.142	4.01275
ENSMUSG00000030577	Cd22	CD22 antigen [Source:MGI Symbol;Acc:MGI:88322]	22.4725	14.0549	17.6625	1.60452	0.451196	3.55614	0.000376347	0.00516675				0.035	0.016	0.045	0.321	0.229	0.254	0.136		0.032	0.235	7.34375	2.87652
ENSMUSG00000043621	Ubxn10	UBX domain protein 10 [Source:MGI Symbol;Acc:MGI:2443123]	47.8644	19.9673	31.9232	1.86856	0.409967	4.55783	5.16851e-06	0.000169028				0.047	0.011	0.035	0.351	0.153	0.326	0.107		0.031	0.23425	7.55645	2.91771
ENSMUSG00000044707	Ccnjl	cyclin J-like [Source:MGI Symbol;Acc:MGI:2685723]	95.7678	52.6061	71.104	1.80634	0.320474	5.63646	1.73583e-08	1.27392e-06				0.052	0.036	0.039	0.32	0.209	0.283	0.124		0.0423333	0.234	5.52756	2.46664
ENSMUSG00000034785	Dio1	deiodinase, iodothyronine, type I [Source:MGI Symbol;Acc:MGI:94896]	24.8167	11.9609	17.4705	1.92103	0.460897	4.16801	3.07264e-05	0.000727791				0.027	0	0.024	0.306	0.182	0.319	0.129		0.017	0.234	13.7647	3.7829
ENSMUSG00000069833	Ahnak	AHNAK nucleoprotein (desmoyokin) [Source:MGI Symbol;Acc:MGI:1316648]	114.007	117.151	115.804	1.42086	0.285957	4.9688	6.7367e-07	3.00248e-05				0.042	0.04	0.124	0.301	0.14	0.162	0.332		0.0686667	0.23375	3.40413	1.76728
ENSMUSG00000006056	Calcoco2	calcium binding and coiled-coil domain 2 [Source:MGI Symbol;Acc:MGI:1343177]	16.6659	13.5722	14.8981	1.52308	0.455665	3.34253	0.000830175	0.00896974				0.041	0.018	0.038	0.226	0.188	0.271	0.25		0.0323333	0.23375	7.22938	2.85387
ENSMUSG00000022229	Atp12a	ATPase, H+/K+ transporting, nongastric, alpha polypeptide [Source:MGI Symbol;Acc:MGI:1926943]	28.7587	28.9578	28.8725	1.44505	0.401028	3.60337	0.000314116	0.00449727				0.051	0.02	0.077	0.256	0.085	0.203	0.385		0.0493333	0.23225	4.70777	2.23504
ENSMUSG00000033847	Pla2g4c	phospholipase A2, group IVC (cytosolic, calcium-independent) [Source:MGI Symbol;Acc:MGI:1196403]	44.9661	46.9547	46.1025	1.31895	0.359441	3.66944	0.00024308	0.00371057				0.055	0.039	0.096	0.246	0.222	0.197	0.245		0.0633333	0.2275	3.59211	1.84483
ENSMUSG00000026532	Spta1	spectrin alpha, erythrocytic 1 [Source:MGI Symbol;Acc:MGI:98385]	101.184	88.6997	94.0499	1.51362	0.297054	5.09543	3.47956e-07	1.68474e-05				0.046	0.037	0.092	0.264	0.18	0.216	0.239		0.0583333	0.22475	3.85286	1.94593
ENSMUSG00000022715	Tmem114	transmembrane protein 114 [Source:MGI Symbol;Acc:MGI:1921970]	23.2994	12.7865	17.292	1.78875	0.449493	3.97949	6.90642e-05	0.00137545				0.033	0.02	0.018	0.293	0.114	0.262	0.228		0.0236667	0.22425	9.47535	3.24418
ENSMUSG00000001827	Folr1	folate receptor 1 (adult) [Source:MGI Symbol;Acc:MGI:95568]	14.4808	12.5131	13.3564	1.72427	0.464442	3.71257	0.000205167	0.00325287				0.007	0.019	0.031	0.169	0.099	0.265	0.363		0.019	0.224	11.7895	3.55943
ENSMUSG00000024074	Crim1	cysteine rich transmembrane BMP regulator 1 (chordin like) [Source:MGI Symbol;Acc:MGI:1354756]	240.628	260.71	252.103	0.801113	0.24267	3.30124	0.000962573	0.00987525				0.099	0.086	0.117	0.228	0.308	0.197	0.159		0.100667	0.223	2.21523	1.14746
ENSMUSG00000038354	Ankrd35	ankyrin repeat domain 35 [Source:MGI Symbol;Acc:MGI:2442590]	25.5409	22.6141	23.8685	1.67704	0.424183	3.95358	7.69899e-05	0.00150122				0.025	0.026	0.05	0.136	0.227	0.31	0.216		0.0336667	0.22225	6.60149	2.72279
ENSMUSG00000043924	Ncmap	noncompact myelin associated protein [Source:MGI Symbol;Acc:MGI:2444888]	39.5002	23.9898	30.6371	2.26045	0.420846	5.3712	7.82126e-08	4.57041e-06				0.039	0.016	0.003	0.325	0.173	0.2	0.189		0.0193333	0.22175	11.4698	3.51977
ENSMUSG00000031253	Srpx2	sushi-repeat-containing protein, X-linked 2 [Source:MGI Symbol;Acc:MGI:1916042]	40.9557	17.7283	27.6829	1.48195	0.410071	3.6139	0.000301631	0.00435531				0.043	0.052	0.028	0.269	0.139	0.336	0.141		0.041	0.22125	5.39634	2.43198
ENSMUSG00000040935	Padi6	peptidyl arginine deiminase, type VI [Source:MGI Symbol;Acc:MGI:2655198]	20.5558	13.7874	16.6882	1.68306	0.449621	3.74329	0.000181628	0.00296215				0.034	0.02	0.025	0.216	0.156	0.288	0.222		0.0263333	0.2205	8.37342	3.06582
ENSMUSG00000002980	Bcam	basal cell adhesion molecule [Source:MGI Symbol;Acc:MGI:1929940]	25.0622	7.9675	15.2938	1.96058	0.463006	4.23446	2.29097e-05	0.000578671				0.029	0	0.013	0.363	0.121	0.304	0.091		0.014	0.21975	15.6964	3.97236
ENSMUSG00000031551	Ido1	indoleamine 2,3-dioxygenase 1 [Source:MGI Symbol;Acc:MGI:96416]	14.7095	13.4637	13.9976	1.62487	0.461184	3.52325	0.000426291	0.0055782				0.04	0.012	0.022	0.256	0.229	0.18	0.211		0.0246667	0.219	8.87838	3.1503
ENSMUSG00000030107	Usp18	ubiquitin specific peptidase 18 [Source:MGI Symbol;Acc:MGI:1344364]	29.8986	27.5507	28.5569	1.61434	0.405235	3.98372	6.78439e-05	0.0013559				0.034	0.022	0.065	0.234	0.16	0.21	0.271		0.0403333	0.21875	5.42355	2.43924
ENSMUSG00000027356	Fermt1	fermitin family member 1 [Source:MGI Symbol;Acc:MGI:2443583]	50.421	46.5631	48.2165	1.65355	0.36478	4.533	5.81525e-06	0.000186258				0.054	0.017	0.064	0.249	0.176	0.209	0.239		0.045	0.21825	4.85	2.27798
ENSMUSG00000028876	Epha10	Eph receptor A10 [Source:MGI Symbol;Acc:MGI:3586824]	45.8949	40.3314	42.7157	1.55243	0.362959	4.27716	1.89295e-05	0.000493614				0.056	0.036	0.047	0.236	0.142	0.209	0.282		0.0463333	0.21725	4.68885	2.22923
ENSMUSG00000027360	Hdc	histidine decarboxylase [Source:MGI Symbol;Acc:MGI:96062]	38.916	18.894	27.4749	1.88159	0.418618	4.49478	6.96414e-06	0.000215645				0.017	0.021	0.041	0.222	0.137	0.348	0.159		0.0263333	0.2165	8.22152	3.0394
ENSMUSG00000021553	Slc28a3	solute carrier family 28 (sodium-coupled nucleoside transporter), member 3 [Source:MGI Symbol;Acc:MGI:2137361]	90.8971	57.2998	71.6986	2.04222	0.324355	6.29624	3.04954e-10	3.40398e-08				0.026	0.026	0.045	0.268	0.121	0.246	0.231		0.0323333	0.2165	6.69588	2.74327
ENSMUSG00000044165	Bcl2l15	BCLl2-like 15 [Source:MGI Symbol;Acc:MGI:2685412]	29.9391	18.8947	23.6281	1.82015	0.425546	4.27722	1.89241e-05	0.000493614				0.027	0.018	0.039	0.259	0.151	0.255	0.195		0.028	0.215	7.67857	2.94084
ENSMUSG00000073598	1700066B19Rik	RIKEN cDNA 1700066B19 gene [Source:MGI Symbol;Acc:MGI:1920699]	47.6461	16.5903	29.8999	1.76948	0.409697	4.31899	1.56747e-05	0.000423466				0.062	0.017	0.014	0.309	0.151	0.349	0.049		0.031	0.2145	6.91935	2.79064
ENSMUSG00000020399	Havcr2	hepatitis A virus cellular receptor 2 [Source:MGI Symbol;Acc:MGI:2159682]	36.5822	26.3347	30.7265	1.31645	0.396834	3.31739	0.000908638	0.00950808				0.039	0.032	0.084	0.222	0.13	0.283	0.223		0.0516667	0.2145	4.15161	2.05367
ENSMUSG00000029206	Nsun7	NOL1/NOP2/Sun domain family, member 7 [Source:MGI Symbol;Acc:MGI:1918168]	48.0384	43.2369	45.2947	1.25856	0.361566	3.48085	0.000499819	0.00617846				0.093	0.026	0.06	0.232	0.135	0.231	0.249		0.0596667	0.21175	3.54888	1.82736
ENSMUSG00000072553	Gm525	predicted gene 525 [Source:MGI Symbol;Acc:MGI:2685371]	22.5848	17.4533	19.6525	2.04231	0.446015	4.57901	4.67181e-06	0.000155236				0.031	0.008	0.015	0.258	0.203	0.197	0.188		0.018	0.2115	11.75	3.55459
ENSMUSG00000051048	P4ha3	procollagen-proline, 2-oxoglutarate 4-dioxygenase (proline 4-hydroxylase), alpha polypeptide III [Source:MGI Symbol;Acc:MGI:2444049]	42.243	34.2455	37.673	1.65354	0.376152	4.39594	1.10293e-05	0.000314368				0.04	0.023	0.059	0.259	0.125	0.2	0.258		0.0406667	0.2105	5.17623	2.3719
ENSMUSG00000037451	Slc22a20	solute carrier family 22 (organic anion transporter), member 20 [Source:MGI Symbol;Acc:MGI:2685809]	18.6202	14.9472	16.5213	1.66423	0.452355	3.67903	0.000234122	0.00360089				0.033	0.024	0.018	0.255	0.126	0.177	0.284		0.025	0.2105	8.42	3.07382
ENSMUSG00000026468	Lhx4	LIM homeobox protein 4 [Source:MGI Symbol;Acc:MGI:101776]	72.4454	40.1451	53.9881	2.69974	0.358609	7.52837	5.13779e-14	1.38051e-11				0.021	0.013	0.014	0.226	0.174	0.289	0.152		0.016	0.21025	13.1406	3.71596
ENSMUSG00000009292	Trpm2	transient receptor potential cation channel, subfamily M, member 2 [Source:MGI Symbol;Acc:MGI:1351901]	90.8462	54.4004	70.02	1.61012	0.317225	5.07564	3.86188e-07	1.84116e-05				0.051	0.028	0.056	0.279	0.133	0.255	0.169		0.045	0.209	4.64444	2.21551
ENSMUSG00000026418	Tnni1	troponin I, skeletal, slow 1 [Source:MGI Symbol;Acc:MGI:105073]	41.5326	24.1976	31.6269	2.15333	0.415487	5.18267	2.18733e-07	1.13577e-05				0.014	0.022	0.024	0.319	0.102	0.174	0.236		0.02	0.20775	10.3875	3.37678
ENSMUSG00000041992	Rapgef5	Rap guanine nucleotide exchange factor (GEF) 5 [Source:MGI Symbol;Acc:MGI:2444365]	335.733	309.309	320.633	0.837647	0.190079	4.40683	1.04895e-05	0.000301753				0.105	0.109	0.072	0.24	0.262	0.168	0.158		0.0953333	0.207	2.17133	1.11858
ENSMUSG00000045777	Ifitm10	interferon induced transmembrane protein 10 [Source:MGI Symbol;Acc:MGI:2444776]	59.8701	52.2434	55.512	1.28318	0.3304	3.88372	0.000102869	0.00188182				0.067	0.034	0.078	0.266	0.119	0.184	0.255		0.0596667	0.206	3.45251	1.78765
ENSMUSG00000033122	Hsd17b3	hydroxysteroid (17-beta) dehydrogenase 3 [Source:MGI Symbol;Acc:MGI:107177]	36.7797	31.9067	33.9951	1.49887	0.389953	3.84372	0.000121186	0.00214727				0.042	0.018	0.074	0.213	0.129	0.233	0.248		0.0446667	0.20575	4.60634	2.20362
ENSMUSG00000038572	Bpifb5	BPI fold containing family B, member 5 [Source:MGI Symbol;Acc:MGI:2385160]	23.7009	11.8025	16.9018	1.80044	0.462922	3.8893	0.000100533	0.00184817				0	0.027	0.022	0.254	0.166	0.256	0.145		0.0163333	0.20525	12.5663	3.65149
ENSMUSG00000031022	BC051019	cDNA sequence BC051019 [Source:MGI Symbol;Acc:MGI:1928824]	13.9369	10.1839	11.7923	1.5534	0.4665	3.3299	0.000868782	0.0092475				0.015	0.033	0.016	0.219	0.269	0.209	0.116		0.0213333	0.20325	9.52734	3.25207
ENSMUSG00000032489	Kif9	kinesin family member 9 [Source:MGI Symbol;Acc:MGI:1098237]	64.8117	47.8563	55.1229	1.25783	0.338185	3.71936	0.000199729	0.0031849				0.048	0.05	0.075	0.255	0.132	0.21	0.215		0.0576667	0.203	3.52023	1.81567
ENSMUSG00000048938	Nr1h5	nuclear receptor subfamily 1, group H, member 5 [Source:MGI Symbol;Acc:MGI:3026618]	32.0588	19.6034	24.9414	1.61158	0.424042	3.80052	0.000144395	0.00246715				0.049	0.013	0.035	0.221	0.155	0.28	0.138		0.0323333	0.1985	6.13918	2.61804
ENSMUSG00000032679	Cd59a	CD59a antigen [Source:MGI Symbol;Acc:MGI:109177]	19.1578	20.6628	20.0178	1.53684	0.438782	3.50251	0.000460901	0.00586062				0.035	0.012	0.054	0.222	0.165	0.15	0.254		0.0336667	0.19775	5.87376	2.55428
ENSMUSG00000049303	Syt12	synaptotagmin XII [Source:MGI Symbol;Acc:MGI:2159601]	32.6926	36.1116	34.6463	1.33822	0.381691	3.50602	0.000454856	0.00581548				0.038	0.049	0.061	0.138	0.238	0.205	0.208		0.0493333	0.19725	3.99831	1.99939
ENSMUSG00000061086	Myl4	myosin, light polypeptide 4 [Source:MGI Symbol;Acc:MGI:97267]	61.5912	34.3586	46.0297	1.70689	0.357621	4.7729	1.81593e-06	6.97954e-05				0.044	0.022	0.042	0.286	0.097	0.225	0.18		0.036	0.197	5.47222	2.45213
ENSMUSG00000022805	Maats1	MYCBP-associated, testis expressed 1 [Source:MGI Symbol;Acc:MGI:2443598]	52.6855	40.2402	45.5739	1.71727	0.363264	4.72732	2.27503e-06	8.49878e-05				0.027	0.023	0.058	0.162	0.15	0.275	0.198		0.036	0.19625	5.45139	2.44662
ENSMUSG00000061397	Krt79	keratin 79 [Source:MGI Symbol;Acc:MGI:2385030]	13.3554	8.0817	10.3418	1.58397	0.470885	3.3638	0.00076876	0.00847455				0.016	0.028	0	0.3	0.234	0.145	0.103		0.0146667	0.1955	13.3295	3.73656
ENSMUSG00000033427	Upb1	ureidopropionase, beta [Source:MGI Symbol;Acc:MGI:2143535]	36.6164	32.2306	34.1102	1.97654	0.402074	4.91585	8.83989e-07	3.80564e-05				0.042	0.02	0.014	0.186	0.189	0.204	0.201		0.0253333	0.195	7.69737	2.94437
ENSMUSG00000033498	Strc	stereocilin [Source:MGI Symbol;Acc:MGI:2153816]	24.6256	20.6343	22.3448	1.91504	0.431113	4.44208	8.90927e-06	0.000264035				0.015	0.013	0.037	0.141	0.101	0.255	0.279		0.0216667	0.194	8.95385	3.16251
ENSMUSG00000028023	Pitx2	paired-like homeodomain transcription factor 2 [Source:MGI Symbol;Acc:MGI:109340]	29.4721	8.78572	17.6513	2.12462	0.457493	4.64405	3.41646e-06	0.000119263				0.009	0.008	0.015	0.251	0.121	0.329	0.069		0.0106667	0.1925	18.0469	4.17368
ENSMUSG00000036718	Micall2	MICAL-like 2 [Source:MGI Symbol;Acc:MGI:2444818]	35.6712	25.2916	29.74	1.50495	0.415844	3.61901	0.000295729	0.00430006				0.041	0.05	0.016	0.208	0.128	0.202	0.229		0.0356667	0.19175	5.37617	2.42658
ENSMUSG00000031142	Cacna1f	calcium channel, voltage-dependent, alpha 1F subunit [Source:MGI Symbol;Acc:MGI:1859639]	36.7328	19.6937	26.9962	1.80798	0.413121	4.37638	1.20665e-05	0.000339768				0.028	0.025	0.027	0.267	0.129	0.217	0.153		0.0266667	0.1915	7.18125	2.84423
ENSMUSG00000024942	Capn1	calpain 1 [Source:MGI Symbol;Acc:MGI:88263]	32.1815	18.6754	24.4637	2.34457	0.43328	5.41122	6.25961e-08	3.84234e-06				0.019	0.011	0.007	0.209	0.119	0.242	0.19		0.0123333	0.19	15.4054	3.94536
ENSMUSG00000030337	Vamp1	vesicle-associated membrane protein 1 [Source:MGI Symbol;Acc:MGI:1313276]	38.6394	24.839	30.7535	1.43999	0.393534	3.65911	0.000253092	0.00381706				0.048	0.043	0.031	0.256	0.166	0.189	0.141		0.0406667	0.188	4.62295	2.20881
ENSMUSG00000042817	Flt3	FMS-like tyrosine kinase 3 [Source:MGI Symbol;Acc:MGI:95559]	69.2003	64.7431	66.6533	2.08739	0.356474	5.85565	4.7516e-09	4.01766e-07				0.011	0.012	0.064	0.196	0.131	0.18	0.243		0.029	0.1875	6.46552	2.69277
ENSMUSG00000027460	Angpt4	angiopoietin 4 [Source:MGI Symbol;Acc:MGI:1336887]	39.3017	24.4168	30.796	2.28384	0.407879	5.5993	2.1522e-08	1.52661e-06				0.025	0.009	0.017	0.229	0.12	0.215	0.185		0.017	0.18725	11.0147	3.46136
ENSMUSG00000001988	Npas1	neuronal PAS domain protein 1 [Source:MGI Symbol;Acc:MGI:109205]	29.1018	12.8232	19.7998	1.55747	0.442646	3.51854	0.000433926	0.00564467				0.041	0.011	0.032	0.271	0.126	0.261	0.086		0.028	0.186	6.64286	2.7318
ENSMUSG00000032246	Calml4	calmodulin-like 4 [Source:MGI Symbol;Acc:MGI:1922850]	18.7045	15.1915	16.6971	1.49814	0.44923	3.3349	0.000853305	0.00912177				0.029	0.026	0.027	0.16	0.107	0.22	0.254		0.0273333	0.18525	6.77744	2.76074
ENSMUSG00000066894	Vsig10	V-set and immunoglobulin domain containing 10 [Source:MGI Symbol;Acc:MGI:2448533]	44.3523	27.9535	34.9815	1.56106	0.388136	4.02193	5.77232e-05	0.00119425				0.05	0.017	0.043	0.234	0.13	0.231	0.145		0.0366667	0.185	5.04545	2.33498
ENSMUSG00000044162	Tnip3	TNFAIP3 interacting protein 3 [Source:MGI Symbol;Acc:MGI:3041165]	44.3857	38.9456	41.2771	1.88025	0.3781	4.97288	6.59649e-07	2.95589e-05				0.042	0.018	0.026	0.165	0.159	0.213	0.202		0.0286667	0.18475	6.44477	2.68813
ENSMUSG00000020154	Ptprb	protein tyrosine phosphatase, receptor type, B [Source:MGI Symbol;Acc:MGI:97809]	89.9306	77.9378	83.0776	2.10058	0.309775	6.78099	1.19359e-11	1.82374e-09				0.023	0.02	0.046	0.252	0.118	0.126	0.243		0.0296667	0.18475	6.22753	2.63866
ENSMUSG00000049811	Fam161a	family with sequence similarity 161, member A [Source:MGI Symbol;Acc:MGI:1921123]	25.0302	20.4064	22.388	1.45841	0.43265	3.37088	0.000749295	0.00830911				0.033	0.047	0.021	0.271	0.139	0.095	0.233		0.0336667	0.1845	5.4802	2.45423
ENSMUSG00000034422	Parp14	poly (ADP-ribose) polymerase family, member 14 [Source:MGI Symbol;Acc:MGI:1919489]	45.4621	32.3649	37.978	1.53579	0.378274	4.06	4.90723e-05	0.00105266				0.036	0.024	0.057	0.221	0.13	0.212	0.175		0.039	0.1845	4.73077	2.24207
ENSMUSG00000040428	Plekha4	pleckstrin homology domain containing, family A (phosphoinositide binding specific) member 4 [Source:MGI Symbol;Acc:MGI:1916467]	28.7545	21.5802	24.6549	2.39873	0.430954	5.56609	2.60515e-08	1.81204e-06				0.015	0.014	0.007	0.183	0.242	0.206	0.105		0.012	0.184	15.3333	3.9386
ENSMUSG00000054545	Ugt1a6a	UDP glucuronosyltransferase 1 family, polypeptide A6A [Source:MGI Symbol;Acc:MGI:2137698]	100.477	65.7058	80.6076	1.78313	0.303538	5.87449	4.24138e-09	3.6734e-07				0.03	0.034	0.04	0.191	0.157	0.235	0.145		0.0346667	0.182	5.25	2.39232
ENSMUSG00000022479	Vdr	vitamin D receptor [Source:MGI Symbol;Acc:MGI:103076]	69.1855	36.2882	50.387	2.13122	0.396532	5.37463	7.67388e-08	4.49839e-06				0.014	0.017	0.031	0.299	0.188	0.167	0.072		0.0206667	0.1815	8.78226	3.13459
ENSMUSG00000026207	Speg	SPEG complex locus [Source:MGI Symbol;Acc:MGI:109282]	74.6607	40.9017	55.3698	1.51788	0.344085	4.41136	1.02722e-05	0.000298146				0.047	0.026	0.049	0.276	0.118	0.208	0.123		0.0406667	0.18125	4.45697	2.15606
ENSMUSG00000029468	P2rx7	purinergic receptor P2X, ligand-gated ion channel, 7 [Source:MGI Symbol;Acc:MGI:1339957]	62.3973	29.9152	43.8361	1.81404	0.363807	4.98627	6.15569e-07	2.79873e-05				0.045	0.02	0.024	0.262	0.118	0.231	0.109		0.0296667	0.18	6.06742	2.60108
ENSMUSG00000070327	Rnf213	ring finger protein 213 [Source:MGI Symbol;Acc:MGI:1289196]	100.641	79.4657	88.5407	1.85626	0.293254	6.32988	2.45356e-10	2.78883e-08				0.028	0.025	0.048	0.191	0.119	0.197	0.211		0.0336667	0.1795	5.33168	2.41459
ENSMUSG00000051747	Ttn	titin [Source:MGI Symbol;Acc:MGI:98864]	295.962	250.649	270.069	1.74701	0.237315	7.36155	1.81789e-13	3.98675e-11				0.04	0.02	0.061	0.179	0.143	0.213	0.183		0.0403333	0.1795	4.45041	2.15394
ENSMUSG00000030317	Timp4	tissue inhibitor of metalloproteinase 4 [Source:MGI Symbol;Acc:MGI:109125]	9.27736	8.22717	8.67725	1.60785	0.471077	3.41313	0.000642203	0.00743098				0	0.015	0.009	0.145	0.184	0.19	0.197		0.008	0.179	22.375	4.48382
ENSMUSG00000030830	Itgal	integrin alpha L [Source:MGI Symbol;Acc:MGI:96606]	40.4479	31.2916	35.2157	1.88855	0.396711	4.76052	1.93098e-06	7.34634e-05				0.024	0.01	0.044	0.177	0.132	0.22	0.186		0.026	0.17875	6.875	2.78136
ENSMUSG00000025964	Adam23	a disintegrin and metallopeptidase domain 23 [Source:MGI Symbol;Acc:MGI:1345162]	163.712	149.225	155.434	1.29715	0.268552	4.83015	1.3643e-06	5.51669e-05				0.048	0.044	0.079	0.264	0.18	0.109	0.159		0.057	0.178	3.12281	1.64284
ENSMUSG00000050022	Amz1	archaelysin family metallopeptidase 1 [Source:MGI Symbol;Acc:MGI:2442258]	40.1976	33.8656	36.5793	1.27459	0.383689	3.32193	0.000893963	0.00942022				0.025	0.044	0.072	0.181	0.153	0.187	0.182		0.047	0.17575	3.73936	1.90279
ENSMUSG00000053199	Arhgap20	Rho GTPase activating protein 20 [Source:MGI Symbol;Acc:MGI:2445175]	87.5841	84.5248	85.8359	1.43245	0.294425	4.86525	1.14311e-06	4.73528e-05				0.044	0.031	0.063	0.142	0.146	0.207	0.202		0.046	0.17425	3.78804	1.92145
ENSMUSG00000047730	Fcgbp	Fc fragment of IgG binding protein [Source:MGI Symbol;Acc:MGI:2444336]	48.218	36.8536	41.7241	2.47755	0.406905	6.08877	1.1378e-09	1.08768e-07				0.021	0.003	0.017	0.19	0.19	0.19	0.127		0.0136667	0.17425	12.75	3.67243
ENSMUSG00000012123	Aim1l	absent in melanoma 1-like [Source:MGI Symbol;Acc:MGI:1334463]	33.7896	15.7544	23.4838	1.53773	0.436931	3.51939	0.000432545	0.00563064				0.026	0.041	0.014	0.265	0.086	0.184	0.161		0.027	0.174	6.44444	2.68806
ENSMUSG00000029095	Ablim2	actin-binding LIM protein 2 [Source:MGI Symbol;Acc:MGI:2385758]	128.037	102.834	113.635	2.00872	0.2709	7.41497	1.21651e-13	2.83463e-11				0.029	0.024	0.038	0.208	0.127	0.159	0.195		0.0303333	0.17225	5.67857	2.50553
ENSMUSG00000053490	Trim60	tripartite motif-containing 60 [Source:MGI Symbol;Acc:MGI:2387430]	17.9524	16.6856	17.2285	1.69746	0.452039	3.75511	0.000173265	0.00286587				0.026	0.004	0.033	0.171	0.108	0.175	0.234		0.021	0.172	8.19048	3.03395
ENSMUSG00000048126	Col6a3	collagen, type VI, alpha 3 [Source:MGI Symbol;Acc:MGI:88461]	77.3626	60.3108	67.6187	2.08131	0.320915	6.48554	8.84163e-11	1.11363e-08				0.034	0.015	0.029	0.211	0.11	0.161	0.2		0.026	0.1705	6.55769	2.71319
ENSMUSG00000022747	St3gal6	ST3 beta-galactoside alpha-2,3-sialyltransferase 6 [Source:MGI Symbol;Acc:MGI:1888707]	66.2841	36.8335	49.4552	1.72925	0.358784	4.81976	1.43731e-06	5.75214e-05				0.028	0.025	0.039	0.227	0.124	0.207	0.121		0.0306667	0.16975	5.53533	2.46867
ENSMUSG00000025969	Nrp2	neuropilin 2 [Source:MGI Symbol;Acc:MGI:1100492]	122.403	98.8907	108.967	1.51602	0.268134	5.65399	1.56764e-08	1.17359e-06				0.053	0.046	0.036	0.253	0.164	0.106	0.153		0.045	0.169	3.75556	1.90903
ENSMUSG00000048191	Muc6	mucin 6, gastric [Source:MGI Symbol;Acc:MGI:2663233]	22.7889	15.3178	18.5197	1.63489	0.447841	3.6506	0.000261625	0.00390781				0.008	0.028	0.031	0.178	0.126	0.196	0.176		0.0223333	0.169	7.56716	2.91975
ENSMUSG00000024451	Arap3	ArfGAP with RhoGAP domain, ankyrin repeat and PH domain 3 [Source:MGI Symbol;Acc:MGI:2147274]	34.4885	11.0462	21.0929	1.61486	0.437338	3.69248	0.000222075	0.00346709				0.024	0.025	0.019	0.198	0.118	0.313	0.045		0.0226667	0.1685	7.43382	2.8941
ENSMUSG00000029830	Svopl	SV2 related protein homolog (rat)-like [Source:MGI Symbol;Acc:MGI:2444335]	79.9926	43.0164	58.8634	1.25218	0.332273	3.76854	0.000164204	0.00275048				0.052	0.042	0.041	0.206	0.086	0.238	0.143		0.045	0.16825	3.73889	1.90261
ENSMUSG00000023274	Cd4	CD4 antigen [Source:MGI Symbol;Acc:MGI:88335]	21.656	18.969	20.1206	1.64014	0.439983	3.72772	0.000193217	0.00310497				0.037	0.01	0.028	0.217	0.166	0.135	0.154		0.025	0.168	6.72	2.74846
ENSMUSG00000031465	Angpt2	angiopoietin 2 [Source:MGI Symbol;Acc:MGI:1202890]	53.5426	44.0848	48.1381	1.33028	0.357443	3.72166	0.000197919	0.00316416				0.034	0.036	0.065	0.193	0.161	0.172	0.145		0.045	0.16775	3.72778	1.89832
ENSMUSG00000043460	Elfn2	leucine rich repeat and fibronectin type III, extracellular 2 [Source:MGI Symbol;Acc:MGI:3608416]	57.943	32.0419	43.1424	1.53672	0.360374	4.26423	2.00592e-05	0.00052006				0.052	0.034	0.022	0.231	0.144	0.201	0.094		0.036	0.1675	4.65278	2.21809
ENSMUSG00000029074	Ttll10	tubulin tyrosine ligase-like family, member 10 [Source:MGI Symbol;Acc:MGI:1921855]	25.1882	17.6451	20.8778	1.64585	0.432932	3.80163	0.000143749	0.00246289				0.025	0.016	0.035	0.195	0.12	0.189	0.165		0.0253333	0.16725	6.60197	2.7229
ENSMUSG00000020890	Gucy2e	guanylate cyclase 2e [Source:MGI Symbol;Acc:MGI:105123]	23.7653	9.51287	15.621	1.54998	0.456721	3.39371	0.000689537	0.00781377				0.041	0.004	0.02	0.246	0.08	0.245	0.096		0.0216667	0.16675	7.69615	2.94414
ENSMUSG00000081769	Gm12216	predicted gene 12216 [Source:MGI Symbol;Acc:MGI:3650088]	75.625	54.0131	63.2754	2.14742	0.336445	6.38266	1.74033e-10	2.05326e-08				0.015	0.019	0.034	0.168	0.125	0.2	0.17		0.0226667	0.16575	7.3125	2.87036
ENSMUSG00000022708	Zbtb20	zinc finger and BTB domain containing 20 [Source:MGI Symbol;Acc:MGI:1929213]	842.197	873.961	860.348	0.636426	0.154263	4.12559	3.69783e-05	0.000833539				0.089	0.091	0.095	0.2	0.158	0.114	0.189		0.0916667	0.16525	1.80273	0.850181
ENSMUSG00000020010	Vnn3	vanin 3 [Source:MGI Symbol;Acc:MGI:1347055]	15.3929	14.8924	15.1069	1.54588	0.45984	3.36178	0.000774427	0.008516				0.023	0.004	0.036	0.139	0.135	0.186	0.197		0.021	0.16425	7.82143	2.96743
ENSMUSG00000025279	Dnase1l3	deoxyribonuclease 1-like 3 [Source:MGI Symbol;Acc:MGI:1314633]	32.9605	15.8465	23.181	2.3462	0.442817	5.29835	1.16852e-07	6.52166e-06				0.02	0.003	0.006	0.19	0.142	0.24	0.083		0.00966667	0.16375	16.9397	4.08233
ENSMUSG00000002100	Mybpc3	myosin binding protein C, cardiac [Source:MGI Symbol;Acc:MGI:102844]	18.2584	12.6143	15.0332	1.58704	0.455745	3.4823	0.000497134	0.00616272				0.014	0.021	0.026	0.131	0.166	0.233	0.123		0.0203333	0.16325	8.02869	3.00516
ENSMUSG00000045004	Spata21	spermatogenesis associated 21 [Source:MGI Symbol;Acc:MGI:3607787]	25.1372	15.7649	19.7816	1.70152	0.446502	3.81079	0.000138526	0.00238877				0.007	0.019	0.035	0.197	0.113	0.185	0.157		0.0203333	0.163	8.01639	3.00295
ENSMUSG00000054598	9130230L23Rik	RIKEN cDNA 9130230L23 gene [Source:MGI Symbol;Acc:MGI:3041166]	26.7285	14.5954	19.7953	1.7959	0.446799	4.01947	5.83287e-05	0.00120167				0.035	0.006	0.012	0.144	0.099	0.27	0.136		0.0176667	0.16225	9.18396	3.19912
ENSMUSG00000041957	Pkp2	plakophilin 2 [Source:MGI Symbol;Acc:MGI:1914701]	53.1408	47.3022	49.8044	1.86208	0.355134	5.24332	1.5771e-07	8.59614e-06				0.042	0.016	0.026	0.189	0.107	0.144	0.209		0.028	0.16225	5.79464	2.53472
ENSMUSG00000045326	Fndc7	fibronectin type III domain containing 7 [Source:MGI Symbol;Acc:MGI:2443535]	33.1344	27.0982	29.6851	1.83903	0.403737	4.55501	5.23834e-06	0.000170713				0.026	0.021	0.021	0.136	0.139	0.195	0.174		0.0226667	0.161	7.10294	2.82842
ENSMUSG00000043333	Rhbdl2	rhomboid, veinlet-like 2 (Drosophila) [Source:MGI Symbol;Acc:MGI:3608413]	37.7337	35.9971	36.7413	1.38698	0.378741	3.66209	0.000250162	0.00378512				0.035	0.035	0.043	0.157	0.1	0.151	0.236		0.0376667	0.161	4.27434	2.0957
ENSMUSG00000034127	Tspan8	tetraspanin 8 [Source:MGI Symbol;Acc:MGI:2384918]	34.7879	21.5372	27.216	1.49271	0.42705	3.49541	0.000473341	0.00598613				0.032	0.005	0.053	0.175	0.096	0.24	0.132		0.03	0.16075	5.35833	2.42178
ENSMUSG00000061701	Fbxw20	F-box and WD-40 domain protein 20 [Source:MGI Symbol;Acc:MGI:3584372]	18.2312	10.0117	13.5343	1.6307	0.463089	3.52135	0.000429351	0.00560377				0.03	0.013	0.006	0.165	0.148	0.233	0.091		0.0163333	0.15925	9.75	3.2854
ENSMUSG00000045731	Pnoc	prepronociceptin [Source:MGI Symbol;Acc:MGI:105308]	24.2531	16.2445	19.6768	1.79133	0.443313	4.04077	5.32752e-05	0.00112088				0.035	0.019	0.004	0.23	0.173	0.133	0.1		0.0193333	0.159	8.22414	3.03986
ENSMUSG00000031162	Gata1	GATA binding protein 1 [Source:MGI Symbol;Acc:MGI:95661]	20.6234	9.09743	14.0371	1.79852	0.466912	3.85195	0.000117179	0.00208827				0.014	0.016	0	0.144	0.091	0.266	0.132		0.01	0.15825	15.825	3.98413
ENSMUSG00000063415	Cyp26b1	cytochrome P450, family 26, subfamily b, polypeptide 1 [Source:MGI Symbol;Acc:MGI:2176159]	23.4374	11.5048	16.6188	2.15358	0.456863	4.71385	2.43082e-06	9.00603e-05				0.012	0.007	0.008	0.347	0.135	0.06	0.09		0.009	0.158	17.5556	4.13386
ENSMUSG00000028591	Pramef12	PRAME family member 12 [Source:MGI Symbol;Acc:MGI:1924882]	17.1318	8.81611	12.38	1.71966	0.470839	3.65234	0.000259865	0.00389174				0	0	0.028	0.17	0.068	0.233	0.161		0.00933333	0.158	16.9286	4.08139
ENSMUSG00000071262	Zfp957	zinc finger protein 957 [Source:MGI Symbol;Acc:MGI:2145729]	35.1883	24.3281	28.9825	1.42414	0.408566	3.4857	0.000490852	0.00611812				0.025	0.024	0.049	0.223	0.068	0.143	0.194		0.0326667	0.157	4.80612	2.26487
ENSMUSG00000079173	Zan	zonadhesin [Source:MGI Symbol;Acc:MGI:106656]	90.2811	67.1675	77.0733	2.26603	0.329067	6.88622	5.72924e-12	9.56006e-10				0.018	0.01	0.035	0.191	0.12	0.159	0.156		0.021	0.1565	7.45238	2.8977
ENSMUSG00000032334	Loxl1	lysyl oxidase-like 1 [Source:MGI Symbol;Acc:MGI:106096]	29.3234	12.6805	19.8132	1.55179	0.454077	3.41746	0.000632076	0.00733677				0.007	0.018	0.037	0.23	0.112	0.201	0.08		0.0206667	0.15575	7.53629	2.91385
ENSMUSG00000031980	Agt	angiotensinogen (serpin peptidase inhibitor, clade A, member 8) [Source:MGI Symbol;Acc:MGI:87963]	11.4417	8.1708	9.5726	1.60179	0.471417	3.39782	0.000679252	0.00773957				0.007	0	0.022	0.148	0.072	0.195	0.206		0.00966667	0.15525	16.0603	4.00543
ENSMUSG00000021804	Rgr	retinal G protein coupled receptor [Source:MGI Symbol;Acc:MGI:1929473]	8.71259	8.19377	8.41612	1.57479	0.47084	3.34464	0.000823902	0.00892928				0	0.014	0.008	0.144	0.182	0.138	0.157		0.00733333	0.15525	21.1705	4.40398
ENSMUSG00000021499	Catsper3	cation channel, sperm associated 3 [Source:MGI Symbol;Acc:MGI:1924106]	26.3281	14.2191	19.4087	1.4862	0.436253	3.40673	0.000657457	0.00755589				0.035	0.019	0.023	0.19	0.09	0.21	0.129		0.0256667	0.15475	6.02922	2.59197
ENSMUSG00000020908	Myh3	myosin, heavy polypeptide 3, skeletal muscle, embryonic [Source:MGI Symbol;Acc:MGI:1339709]	25.3005	12.3796	17.9171	1.90994	0.450217	4.24227	2.21268e-05	0.000561942				0.025	0.013	0.004	0.206	0.115	0.194	0.104		0.014	0.15475	11.0536	3.46644
ENSMUSG00000024300	Myo1f	myosin IF [Source:MGI Symbol;Acc:MGI:107711]	55.7543	34.6657	43.7037	1.37858	0.381549	3.6131	0.000302557	0.0043653				0.013	0.06	0.037	0.141	0.143	0.202	0.126		0.0366667	0.153	4.17273	2.06099
ENSMUSG00000032517	Mobp	myelin-associated oligodendrocytic basic protein [Source:MGI Symbol;Acc:MGI:108511]	40.2367	10.0459	22.9849	2.08836	0.434181	4.80987	1.51026e-06	5.97722e-05				0.024	0.007	0.006	0.217	0.069	0.273	0.05		0.0123333	0.15225	12.3446	3.62581
ENSMUSG00000039145	Camk1d	calcium/calmodulin-dependent protein kinase ID [Source:MGI Symbol;Acc:MGI:2442190]	443.237	311.868	368.169	1.237	0.201158	6.14939	7.77793e-10	7.92286e-08				0.064	0.03	0.052	0.207	0.114	0.17	0.114		0.0486667	0.15125	3.10788	1.63593
ENSMUSG00000033147	Slc22a15	solute carrier family 22 (organic anion/cation transporter), member 15 [Source:MGI Symbol;Acc:MGI:3607704]	57.6302	59.3009	58.5849	1.3044	0.325936	4.00202	6.28029e-05	0.00127885				0.046	0.035	0.047	0.146	0.133	0.139	0.184		0.0426667	0.1505	3.52734	1.81858
ENSMUSG00000070031	Sp140	Sp140 nuclear body protein [Source:MGI Symbol;Acc:MGI:3702467]	39.8574	36.016	37.6624	1.26858	0.371407	3.4156	0.000636418	0.00737319				0.035	0.033	0.056	0.161	0.121	0.148	0.172		0.0413333	0.1505	3.64113	1.86439
ENSMUSG00000027401	Tgm3	transglutaminase 3, E polypeptide [Source:MGI Symbol;Acc:MGI:98732]	31.7436	30.1507	30.8334	1.39859	0.408937	3.42007	0.000626052	0.0072939				0.029	0.01	0.065	0.185	0.11	0.132	0.172		0.0346667	0.14975	4.31971	2.11093
ENSMUSG00000029231	Pdgfra	platelet derived growth factor receptor, alpha polypeptide [Source:MGI Symbol;Acc:MGI:97530]	36.7344	26.5296	30.9031	3.20219	0.428234	7.47766	7.5658e-14	1.90587e-11				0.006	0.002	0.004	0.242	0.108	0.075	0.167		0.004	0.148	37	5.20945
ENSMUSG00000022763	Aifm3	apoptosis-inducing factor, mitochondrion-associated 3 [Source:MGI Symbol;Acc:MGI:1919418]	16.8292	10.0154	12.9356	1.58958	0.466455	3.40779	0.000654917	0.00754064				0.024	0.004	0.016	0.168	0.149	0.198	0.076		0.0146667	0.14775	10.0739	3.33255
ENSMUSG00000031872	Bean1	brain expressed, associated with Nedd4, 1 [Source:MGI Symbol;Acc:MGI:1929597]	41.669	32.1414	36.2246	1.88352	0.390798	4.81967	1.43796e-06	5.75214e-05				0.025	0.024	0.016	0.198	0.1	0.111	0.181		0.0216667	0.1475	6.80769	2.76717
ENSMUSG00000010122	Slc47a1	solute carrier family 47, member 1 [Source:MGI Symbol;Acc:MGI:1914723]	31.1758	21.8595	25.8522	1.75562	0.423187	4.14857	3.34558e-05	0.000773759				0.015	0.022	0.025	0.202	0.079	0.122	0.187		0.0206667	0.1475	7.1371	2.83534
ENSMUSG00000032661	Oas3	2'-5' oligoadenylate synthetase 3 [Source:MGI Symbol;Acc:MGI:2180850]	26.4821	11.9296	18.1664	1.49046	0.448733	3.3215	0.000895357	0.00942425				0.021	0.028	0.016	0.22	0.07	0.169	0.129		0.0216667	0.147	6.78462	2.76227
ENSMUSG00000048003	Catsper4	cation channel, sperm associated 4 [Source:MGI Symbol;Acc:MGI:3043288]	14.308	7.40971	10.3661	1.58691	0.471354	3.3667	0.000760725	0.0084091				0	0	0.025	0.234	0.025	0.135	0.191		0.00833333	0.14625	17.55	4.1334
ENSMUSG00000041609	Ccdc64	coiled-coil domain containing 64 [Source:MGI Symbol;Acc:MGI:1922915]	80.9143	64.7134	71.6566	1.10601	0.311459	3.55106	0.000383678	0.00521674				0.041	0.046	0.061	0.18	0.132	0.142	0.13		0.0493333	0.146	2.95946	1.56533
ENSMUSG00000020178	Adora2a	adenosine A2a receptor [Source:MGI Symbol;Acc:MGI:99402]	19.1879	6.24473	11.7918	1.97123	0.470281	4.19161	2.76985e-05	0.000668502				0.01	0	0.005	0.227	0.101	0.199	0.051		0.005	0.1445	28.9	4.853
ENSMUSG00000001155	Ftcd	formiminotransferase cyclodeaminase [Source:MGI Symbol;Acc:MGI:1339962]	15.1962	6.0799	9.98689	1.63118	0.4708	3.46471	0.000530809	0.00646297				0.018	0.005	0.007	0.245	0.097	0.158	0.077		0.01	0.14425	14.425	3.8505
ENSMUSG00000054720	Lrrc8c	leucine rich repeat containing 8 family, member C [Source:MGI Symbol;Acc:MGI:2140839]	84.3135	58.029	69.2938	1.90948	0.317924	6.0061	1.90038e-09	1.77125e-07				0.029	0.022	0.023	0.194	0.096	0.133	0.15		0.0246667	0.14325	5.80743	2.5379
ENSMUSG00000040310	Alx4	aristaless-like homeobox 4 [Source:MGI Symbol;Acc:MGI:108359]	32.3242	26.8385	29.1895	1.58074	0.406	3.89344	9.88329e-05	0.00182591				0.035	0.02	0.022	0.116	0.127	0.185	0.145		0.0256667	0.14325	5.58117	2.48057
ENSMUSG00000056025	Clca3a1	chloride channel accessory 3A1 [Source:MGI Symbol;Acc:MGI:1316732]	32.2563	14.8074	22.2855	1.49386	0.449604	3.32261	0.0008918	0.00940806				0.039	0	0.027	0.197	0.076	0.211	0.079		0.022	0.14075	6.39773	2.67756
ENSMUSG00000027230	Creb3l1	cAMP responsive element binding protein 3-like 1 [Source:MGI Symbol;Acc:MGI:1347062]	39.5035	25.7682	31.6548	1.45865	0.406693	3.58662	0.000334993	0.00474154				0.031	0.02	0.036	0.199	0.149	0.145	0.07		0.029	0.14075	4.85345	2.27901
ENSMUSG00000022504	Ciita	class II transactivator [Source:MGI Symbol;Acc:MGI:108445]	27.9172	28.3222	28.1486	1.72647	0.424523	4.06684	4.76553e-05	0.00103056				0.022	0.006	0.036	0.13	0.147	0.143	0.138		0.0213333	0.1395	6.53906	2.70908
ENSMUSG00000060180	Myh13	myosin, heavy polypeptide 13, skeletal muscle [Source:MGI Symbol;Acc:MGI:1339967]	34.766	36.9668	36.0236	1.79289	0.38836	4.61656	3.90153e-06	0.000134433				0.028	0.011	0.033	0.156	0.124	0.105	0.172		0.024	0.13925	5.80208	2.53657
ENSMUSG00000031502	Col4a1	collagen, type IV, alpha 1 [Source:MGI Symbol;Acc:MGI:88454]	105.291	75.7767	88.4256	1.4014	0.304395	4.60391	4.14639e-06	0.000141303				0.032	0.026	0.053	0.172	0.114	0.157	0.113		0.037	0.139	3.75676	1.90949
ENSMUSG00000034450	Gulo	gulonolactone (L-) oxidase [Source:MGI Symbol;Acc:MGI:1353434]	15.5364	14.1689	14.7549	1.8775	0.461163	4.07124	4.67645e-05	0.00101435				0.012	0.01	0.009	0.14	0.072	0.12	0.222		0.0103333	0.1385	13.4032	3.74451
ENSMUSG00000040998	Npnt	nephronectin [Source:MGI Symbol;Acc:MGI:2148811]	60.4702	39.7754	48.6446	1.81633	0.365321	4.97187	6.63114e-07	2.96429e-05				0.021	0.014	0.035	0.158	0.114	0.173	0.105		0.0233333	0.1375	5.89286	2.55897
ENSMUSG00000057074	Ces1g	carboxylesterase 1G [Source:MGI Symbol;Acc:MGI:88378]	25.8113	25.4634	25.6125	1.45635	0.411759	3.5369	0.000404848	0.0054096				0.025	0.022	0.038	0.133	0.131	0.129	0.155		0.0283333	0.137	4.83529	2.2736
ENSMUSG00000030834	Abcc6	ATP-binding cassette, sub-family C (CFTR/MRP), member 6 [Source:MGI Symbol;Acc:MGI:1351634]	48.04	26.808	35.9074	2.20756	0.395921	5.57575	2.46461e-08	1.7207e-06				0.019	0.007	0.018	0.231	0.101	0.113	0.101		0.0146667	0.1365	9.30682	3.21829
ENSMUSG00000019647	Sema6a	sema domain, transmembrane domain (TM), and cytoplasmic domain, (semaphorin) 6A [Source:MGI Symbol;Acc:MGI:1203727]	122.276	96.5373	107.568	1.14378	0.30256	3.78035	0.00015661	0.00263957				0.069	0.052	0.019	0.15	0.127	0.144	0.125		0.0466667	0.1365	2.925	1.54844
ENSMUSG00000047228	BC048546	cDNA sequence BC048546 [Source:MGI Symbol;Acc:MGI:3039594]	35.2385	26.7651	30.3966	1.4007	0.39715	3.52688	0.000420485	0.00553549				0.023	0.026	0.041	0.144	0.082	0.155	0.162		0.03	0.13575	4.525	2.17792
ENSMUSG00000062064	Slc2a7	solute carrier family 2 (facilitated glucose transporter), member 7 [Source:MGI Symbol;Acc:MGI:3650865]	19.2255	7.34214	12.435	1.78807	0.468342	3.81788	0.000134601	0.00233188				0.013	0.012	0	0.192	0.088	0.182	0.081		0.00833333	0.13575	16.29	4.02591
ENSMUSG00000051860	Samd7	sterile alpha motif domain containing 7 [Source:MGI Symbol;Acc:MGI:1923203]	18.5317	10.504	13.9444	1.61445	0.460633	3.50486	0.000456853	0.0058322				0.017	0.011	0.018	0.208	0.118	0.129	0.087		0.0153333	0.1355	8.83696	3.14355
ENSMUSG00000042678	Myo15	myosin XV [Source:MGI Symbol;Acc:MGI:1261811]	46.7092	37.156	41.2502	1.83886	0.368593	4.98886	6.07354e-07	2.76814e-05				0.026	0.024	0.018	0.17	0.124	0.112	0.134		0.0226667	0.135	5.95588	2.57432
ENSMUSG00000020053	Igf1	insulin-like growth factor 1 [Source:MGI Symbol;Acc:MGI:96432]	76.5964	45.2115	58.6621	1.2528	0.351665	3.56248	0.000367365	0.00508016				0.035	0.051	0.021	0.128	0.087	0.188	0.132		0.0356667	0.13375	3.75	1.90689
ENSMUSG00000078796	Zfp541	zinc finger protein 541 [Source:MGI Symbol;Acc:MGI:3647699]	18.7388	14.585	16.3652	1.5933	0.451562	3.52842	0.000418041	0.005515				0.014	0.013	0.027	0.141	0.125	0.145	0.12		0.018	0.13275	7.375	2.88264
ENSMUSG00000001930	Vwf	Von Willebrand factor homolog [Source:MGI Symbol;Acc:MGI:98941]	111.713	80.2155	93.7142	2.19585	0.294213	7.46348	8.42651e-14	2.09438e-11				0.022	0.01	0.027	0.168	0.082	0.135	0.145		0.0196667	0.1325	6.73729	2.75217
ENSMUSG00000038648	Creb3l2	cAMP responsive element binding protein 3-like 2 [Source:MGI Symbol;Acc:MGI:2442695]	104.104	64.7681	81.6263	1.5321	0.333317	4.59653	4.29577e-06	0.000145331				0.019	0.02	0.053	0.189	0.072	0.143	0.124		0.0306667	0.132	4.30435	2.10579
ENSMUSG00000031966	Glb1l3	galactosidase, beta 1 like 3 [Source:MGI Symbol;Acc:MGI:1918143]	35.7148	26.6397	30.529	1.32522	0.398347	3.32681	0.000878474	0.00931769				0.046	0.022	0.025	0.143	0.073	0.157	0.153		0.031	0.1315	4.24194	2.08472
ENSMUSG00000034918	Cdhr2	cadherin-related family member 2 [Source:MGI Symbol;Acc:MGI:2687323]	30.1733	17.4088	22.8793	1.80378	0.427693	4.21747	2.47062e-05	0.000611617				0.015	0.018	0.016	0.124	0.086	0.191	0.122		0.0163333	0.13075	8.0051	3.00092
ENSMUSG00000025348	Itga7	integrin alpha 7 [Source:MGI Symbol;Acc:MGI:102700]	16.0294	15.3177	15.6227	1.76555	0.462366	3.81851	0.000134259	0.00233188				0.025	0.006	0.004	0.11	0.144	0.14	0.129		0.0116667	0.13075	11.2071	3.48635
ENSMUSG00000020838	Slc6a4	solute carrier family 6 (neurotransmitter transporter, serotonin), member 4 [Source:MGI Symbol;Acc:MGI:96285]	30.8441	15.4204	22.0306	1.81433	0.430916	4.21041	2.54905e-05	0.000627699				0.02	0.016	0.011	0.151	0.124	0.188	0.06		0.0156667	0.13075	8.34574	3.06104
ENSMUSG00000024207	Acsbg2	acyl-CoA synthetase bubblegum family member 2 [Source:MGI Symbol;Acc:MGI:3587728]	26.4508	15.4433	20.1608	1.73352	0.443017	3.91298	9.11653e-05	0.00171251				0.008	0.015	0.024	0.158	0.064	0.156	0.144		0.0156667	0.1305	8.32979	3.05828
ENSMUSG00000034810	Scn7a	sodium channel, voltage-gated, type VII, alpha [Source:MGI Symbol;Acc:MGI:102965]	88.984	71.3176	78.8889	1.56794	0.336031	4.66606	3.07024e-06	0.000109851				0.022	0.012	0.063	0.199	0.076	0.102	0.144		0.0323333	0.13025	4.02835	2.01019
ENSMUSG00000049565	Aknad1	AKNA domain containing 1 [Source:MGI Symbol;Acc:MGI:3584453]	34.0692	27.277	30.1879	1.36927	0.398416	3.43678	0.000588676	0.00699395				0.032	0.022	0.038	0.193	0.12	0.095	0.111		0.0306667	0.12975	4.23098	2.08099
ENSMUSG00000034738	Nostrin	nitric oxide synthase trafficker [Source:MGI Symbol;Acc:MGI:3606242]	44.1738	33.1569	37.8784	1.36842	0.379614	3.60477	0.000312433	0.00448349				0.034	0.036	0.023	0.16	0.092	0.119	0.148		0.031	0.12975	4.18548	2.06539
ENSMUSG00000022900	Ildr1	immunoglobulin-like domain containing receptor 1 [Source:MGI Symbol;Acc:MGI:2146574]	31.3683	14.4715	21.713	1.48347	0.429783	3.45166	0.000557155	0.00669627				0.024	0.021	0.02	0.155	0.064	0.194	0.103		0.0216667	0.129	5.95385	2.57382
ENSMUSG00000032942	Ucp3	uncoupling protein 3 (mitochondrial, proton carrier) [Source:MGI Symbol;Acc:MGI:1099787]	13.8108	3.38595	7.85376	1.5538	0.468911	3.31364	0.000920907	0.00960102				0.013	0	0	0.234	0.042	0.173	0.067		0.00433333	0.129	29.7692	4.89575
ENSMUSG00000038599	Capn8	calpain 8 [Source:MGI Symbol;Acc:MGI:2181366]	48.7839	37.1185	42.118	2.41168	0.376051	6.41317	1.42521e-10	1.71402e-08				0.015	0.009	0.013	0.149	0.099	0.125	0.141		0.0123333	0.1285	10.4189	3.38113
ENSMUSG00000029205	Chrna9	cholinergic receptor, nicotinic, alpha polypeptide 9 [Source:MGI Symbol;Acc:MGI:1202403]	36.783	22.1331	28.4116	1.53265	0.403504	3.79835	0.000145665	0.00248658				0.024	0.022	0.025	0.134	0.078	0.179	0.123		0.0236667	0.1285	5.42958	2.44084
ENSMUSG00000022799	Arhgap31	Rho GTPase activating protein 31 [Source:MGI Symbol;Acc:MGI:1333857]	93.8106	66.835	78.396	1.61068	0.315448	5.10601	3.29034e-07	1.60985e-05				0.022	0.02	0.043	0.15	0.095	0.146	0.116		0.0283333	0.12675	4.47353	2.16141
ENSMUSG00000031549	Ido2	indoleamine 2,3-dioxygenase 2 [Source:MGI Symbol;Acc:MGI:2142489]	37.749	23.3921	29.545	1.48772	0.411799	3.61273	0.00030299	0.00436817				0.031	0.007	0.037	0.142	0.079	0.184	0.102		0.025	0.12675	5.07	2.34199
ENSMUSG00000013523	Bcas1	breast carcinoma amplified sequence 1 [Source:MGI Symbol;Acc:MGI:1924210]	58.8378	41.1683	48.7409	2.58833	0.392822	6.58907	4.42598e-11	5.9786e-09				0.004	0.011	0.014	0.215	0.129	0.06	0.098		0.00966667	0.1255	12.9828	3.69853
ENSMUSG00000031385	Plxnb3	plexin B3 [Source:MGI Symbol;Acc:MGI:2154240]	13.8443	5.23926	8.92712	1.6256	0.471155	3.45024	0.000560089	0.00672287				0.006	0.01	0	0.126	0.086	0.214	0.073		0.00533333	0.12475	23.3906	4.54786
ENSMUSG00000024210	Ip6k3	inositol hexaphosphate kinase 3 [Source:MGI Symbol;Acc:MGI:3045325]	18.5722	10.4229	13.9155	1.72929	0.468631	3.69009	0.000224176	0.00349111				0	0.003	0.024	0.177	0.032	0.128	0.161		0.009	0.1245	13.8333	3.79008
ENSMUSG00000022270	Fam134b	family with sequence similarity 134, member B [Source:MGI Symbol;Acc:MGI:1913520]	104.737	93.539	98.3383	0.960309	0.273257	3.5143	0.000440909	0.00570242				0.055	0.042	0.047	0.129	0.108	0.133	0.126		0.048	0.124	2.58333	1.36923
ENSMUSG00000023926	Rhag	Rhesus blood group-associated A glycoprotein [Source:MGI Symbol;Acc:MGI:1202713]	21.7437	15.4921	18.1714	1.70822	0.451153	3.78634	0.000152885	0.00259556				0.012	0.024	0.006	0.101	0.093	0.157	0.145		0.014	0.124	8.85714	3.14684
ENSMUSG00000048482	Bdnf	brain derived neurotrophic factor [Source:MGI Symbol;Acc:MGI:88145]	44.9346	23.7469	32.8273	1.76475	0.403067	4.37829	1.19612e-05	0.000337688				0.023	0.007	0.027	0.181	0.078	0.15	0.086		0.019	0.12375	6.51316	2.70336
ENSMUSG00000032514	Ttc21a	tetratricopeptide repeat domain 21A [Source:MGI Symbol;Acc:MGI:1921302]	28.5683	11.3648	18.7377	1.52035	0.451952	3.36397	0.00076829	0.00847437				0.011	0.015	0.025	0.209	0.088	0.146	0.052		0.017	0.12375	7.27941	2.86382
ENSMUSG00000020583	Matn3	matrilin 3 [Source:MGI Symbol;Acc:MGI:1328350]	16.8842	12.0313	14.1111	1.91661	0.462874	4.14066	3.46303e-05	0.000797952				0.011	0.003	0.012	0.162	0.107	0.112	0.112		0.00866667	0.12325	14.2212	3.82997
ENSMUSG00000056602	Fry	FRY microtubule binding protein [Source:MGI Symbol;Acc:MGI:2443895]	319.976	287.896	301.644	0.724802	0.193259	3.75041	0.000176544	0.00290522				0.077	0.044	0.058	0.154	0.097	0.121	0.12		0.0596667	0.123	2.06145	1.04366
ENSMUSG00000026380	Tfcp2l1	transcription factor CP2-like 1 [Source:MGI Symbol;Acc:MGI:2444691]	42.0009	35.4494	38.2572	1.41533	0.371657	3.80817	0.000140002	0.00240976				0.026	0.02	0.042	0.128	0.086	0.135	0.142		0.0293333	0.12275	4.18466	2.06511
ENSMUSG00000028602	Tnfrsf8	tumor necrosis factor receptor superfamily, member 8 [Source:MGI Symbol;Acc:MGI:99908]	38.0456	22.8337	29.3531	1.92536	0.409871	4.69748	2.6339e-06	9.64608e-05				0.011	0.021	0.014	0.122	0.097	0.163	0.108		0.0153333	0.1225	7.98913	2.99804
ENSMUSG00000031616	Ednra	endothelin receptor type A [Source:MGI Symbol;Acc:MGI:105923]	50.9872	33.7348	41.1287	1.37836	0.367672	3.74887	0.000177632	0.00291483				0.027	0.032	0.031	0.161	0.093	0.125	0.11		0.03	0.12225	4.075	2.0268
ENSMUSG00000018654	Ikzf1	IKAROS family zinc finger 1 [Source:MGI Symbol;Acc:MGI:1342540]	70.3181	50.8069	59.1689	1.29919	0.332826	3.90351	9.48095e-05	0.00176206				0.038	0.025	0.03	0.097	0.068	0.185	0.139		0.031	0.12225	3.94355	1.97949
ENSMUSG00000000730	Dnmt3l	DNA (cytosine-5-)-methyltransferase 3-like [Source:MGI Symbol;Acc:MGI:1859287]	10.9319	13.4078	12.3467	1.86935	0.468272	3.99202	6.5513e-05	0.00132311				0.008	0	0.013	0.138	0.048	0.062	0.24		0.007	0.122	17.4286	4.12338
ENSMUSG00000030345	Dyrk4	dual-specificity tyrosine-(Y)-phosphorylation regulated kinase 4 [Source:MGI Symbol;Acc:MGI:1330292]	35.6679	25.4664	29.8385	1.43582	0.399531	3.59375	0.000325949	0.00462759				0.036	0.024	0.019	0.154	0.083	0.123	0.128		0.0263333	0.122	4.63291	2.21192
ENSMUSG00000062960	Kdr	kinase insert domain protein receptor [Source:MGI Symbol;Acc:MGI:96683]	35.018	25.0275	29.3091	1.503	0.410665	3.65992	0.000252299	0.00381436				0.011	0.029	0.031	0.145	0.106	0.121	0.114		0.0236667	0.1215	5.1338	2.36003
ENSMUSG00000048827	Pkd1l3	polycystic kidney disease 1 like 3 [Source:MGI Symbol;Acc:MGI:2664670]	39.6871	40.5818	40.1984	1.199	0.363324	3.30007	0.000966602	0.00990568				0.027	0.033	0.046	0.103	0.098	0.122	0.163		0.0353333	0.1215	3.43868	1.78185
ENSMUSG00000038651	Sycp2l	synaptonemal complex protein 2-like [Source:MGI Symbol;Acc:MGI:2685114]	35.3891	38.5515	37.1962	1.4895	0.37449	3.97741	6.96704e-05	0.00138309				0.03	0.016	0.035	0.133	0.078	0.089	0.181		0.027	0.12025	4.4537	2.15501
ENSMUSG00000016487	Ppfibp1	PTPRF interacting protein, binding protein 1 (liprin beta 1) [Source:MGI Symbol;Acc:MGI:1914783]	93.6177	81.839	86.887	2.31051	0.308699	7.48467	7.17273e-14	1.8316e-11				0.025	0.011	0.013	0.141	0.123	0.102	0.113		0.0163333	0.11975	7.33163	2.87413
ENSMUSG00000059898	Dsc3	desmocollin 3 [Source:MGI Symbol;Acc:MGI:1194993]	34.081	19.4152	25.7006	1.53639	0.417212	3.68251	0.00023095	0.00356977				0.015	0.03	0.019	0.12	0.099	0.166	0.093		0.0213333	0.1195	5.60156	2.48583
ENSMUSG00000030098	Grip2	glutamate receptor interacting protein 2 [Source:MGI Symbol;Acc:MGI:2681173]	44.1713	42.7636	43.3669	1.41038	0.360043	3.91725	8.95665e-05	0.00169332				0.039	0.019	0.033	0.171	0.111	0.071	0.124		0.0303333	0.11925	3.93132	1.97501
ENSMUSG00000041552	Ptchd1	patched domain containing 1 [Source:MGI Symbol;Acc:MGI:2685233]	37.9574	28.0169	32.2771	1.46266	0.392098	3.73035	0.000191215	0.00308077				0.026	0.032	0.017	0.101	0.115	0.153	0.108		0.025	0.11925	4.77	2.25399
ENSMUSG00000033255	Gm5134	predicted gene 5134 [Source:MGI Symbol;Acc:MGI:3646667]	40.1214	32.9384	36.0169	1.2942	0.382968	3.3794	0.000726449	0.00811855				0.023	0.013	0.057	0.12	0.06	0.151	0.144		0.031	0.11875	3.83065	1.93759
ENSMUSG00000046207	Pik3r6	phosphoinositide-3-kinase, regulatory subunit 6 [Source:MGI Symbol;Acc:MGI:2144613]	39.1781	21.1394	28.8703	1.98449	0.412706	4.80847	1.52089e-06	5.99467e-05				0.012	0.012	0.015	0.115	0.111	0.18	0.064		0.013	0.1175	9.03846	3.17608
ENSMUSG00000061723	Tnnt3	troponin T3, skeletal, fast [Source:MGI Symbol;Acc:MGI:109550]	12.6638	6.78736	9.30583	1.57011	0.470247	3.3389	0.000841096	0.00904724				0	0.014	0	0.131	0.078	0.142	0.118		0.00466667	0.11725	25.125	4.65105
ENSMUSG00000028344	Invs	inversin [Source:MGI Symbol;Acc:MGI:1335082]	118.591	98.9192	107.35	0.987924	0.274322	3.60133	0.000316593	0.0045265				0.056	0.034	0.04	0.119	0.114	0.143	0.092		0.0433333	0.117	2.7	1.43296
ENSMUSG00000003617	Cp	ceruloplasmin [Source:MGI Symbol;Acc:MGI:88476]	46.3909	22.2747	32.6102	1.34303	0.394831	3.40154	0.000670078	0.00764907				0.03	0.016	0.033	0.161	0.068	0.169	0.069		0.0263333	0.11675	4.43354	2.14846
ENSMUSG00000059883	Irak4	interleukin-1 receptor-associated kinase 4 [Source:MGI Symbol;Acc:MGI:2182474]	28.4749	19.3315	23.2501	1.39786	0.422442	3.30901	0.00093627	0.0097069				0.032	0.014	0.023	0.102	0.075	0.173	0.112		0.023	0.1155	5.02174	2.32819
ENSMUSG00000029843	Slc13a4	solute carrier family 13 (sodium/sulfate symporters), member 4 [Source:MGI Symbol;Acc:MGI:2442367]	23.0477	24.2907	23.758	1.5645	0.448711	3.48666	0.000489093	0.00611458				0.043	0.008	0.002	0.119	0.099	0.097	0.146		0.0176667	0.11525	6.52358	2.70566
ENSMUSG00000033170	Card10	caspase recruitment domain family, member 10 [Source:MGI Symbol;Acc:MGI:2146012]	16.538	16.055	16.262	1.52051	0.457428	3.32403	0.00088726	0.00937077				0.019	0.025	0.003	0.145	0.112	0.057	0.146		0.0156667	0.115	7.34043	2.87586
ENSMUSG00000029321	Slc10a6	solute carrier family 10 (sodium/bile acid cotransporter family), member 6 [Source:MGI Symbol;Acc:MGI:1923000]	12.9434	12.8554	12.8931	1.79223	0.469353	3.8185	0.000134265	0.00233188				0.018	0.003	0	0.146	0.112	0.067	0.133		0.007	0.1145	16.3571	4.03185
ENSMUSG00000056423	Uts2b	urotensin 2B [Source:MGI Symbol;Acc:MGI:2677064]	8.12069	9.56447	8.94571	1.68546	0.470631	3.58128	0.000341919	0.00481398				0	0	0.011	0.133	0.107	0.058	0.16		0.00366667	0.1145	31.2273	4.96473
ENSMUSG00000074771	Ankef1	ankyrin repeat and EF-hand domain containing 1 [Source:MGI Symbol;Acc:MGI:2441685]	49.5256	26.8219	36.5521	1.47049	0.379285	3.877	0.000105752	0.00192432				0.043	0.015	0.016	0.155	0.068	0.15	0.083		0.0246667	0.114	4.62162	2.2084
ENSMUSG00000025997	Ikzf2	IKAROS family zinc finger 2 [Source:MGI Symbol;Acc:MGI:1342541]	114.834	102.235	107.635	0.965451	0.269288	3.5852	0.000336822	0.00475696				0.035	0.047	0.05	0.118	0.096	0.11	0.127		0.044	0.11275	2.5625	1.35755
ENSMUSG00000028273	Pdlim5	PDZ and LIM domain 5 [Source:MGI Symbol;Acc:MGI:1927489]	120.918	82.6385	99.0441	1.19016	0.301411	3.94863	7.86011e-05	0.00152944				0.026	0.026	0.047	0.127	0.041	0.144	0.139		0.033	0.11275	3.41667	1.77259
ENSMUSG00000045672	Col27a1	collagen, type XXVII, alpha 1 [Source:MGI Symbol;Acc:MGI:2672118]	90.0916	60.5632	73.2182	1.59699	0.314353	5.08024	3.76951e-07	1.80173e-05				0.034	0.019	0.019	0.105	0.09	0.163	0.093		0.024	0.11275	4.69792	2.23202
ENSMUSG00000048534	Amica1	adhesion molecule, interacts with CXADR antigen 1 [Source:MGI Symbol;Acc:MGI:2685484]	18.3238	15.2517	16.5683	1.64054	0.449183	3.65228	0.000259927	0.00389174				0.012	0.016	0.016	0.118	0.1	0.108	0.123		0.0146667	0.11225	7.65341	2.9361
ENSMUSG00000038859	Baiap2l1	BAI1-associated protein 2-like 1 [Source:MGI Symbol;Acc:MGI:1914148]	75.6024	45.6872	58.508	1.22456	0.362676	3.37645	0.000734271	0.00818144				0.019	0.034	0.04	0.173	0.058	0.102	0.116		0.031	0.11225	3.62097	1.85638
ENSMUSG00000034224	Slc38a8	solute carrier family 38, member 8 [Source:MGI Symbol;Acc:MGI:2685433]	16.203	8.79167	11.968	1.57251	0.467551	3.3633	0.000770159	0.00847994				0.008	0.004	0.022	0.136	0.052	0.149	0.112		0.0113333	0.11225	9.90441	3.30807
ENSMUSG00000012519	Mlkl	mixed lineage kinase domain-like [Source:MGI Symbol;Acc:MGI:1921818]	16.9426	12.7344	14.5379	1.55771	0.466513	3.33906	0.000840639	0.00904724				0	0.018	0.018	0.148	0.097	0.083	0.12		0.012	0.112	9.33333	3.22239
ENSMUSG00000036196	Slc26a8	solute carrier family 26, member 8 [Source:MGI Symbol;Acc:MGI:2385046]	33.0533	29.1961	30.8492	1.41033	0.396156	3.56003	0.000370807	0.00511135				0.021	0.021	0.029	0.101	0.06	0.122	0.16		0.0236667	0.11075	4.67958	2.22638
ENSMUSG00000022149	C9	complement component 9 [Source:MGI Symbol;Acc:MGI:1098282]	43.3893	20.0065	30.0277	1.58018	0.436488	3.62021	0.00029437	0.00428699				0.003	0.016	0.032	0.149	0.071	0.151	0.072		0.017	0.11075	6.51471	2.7037
ENSMUSG00000028943	Espn	espin [Source:MGI Symbol;Acc:MGI:1861630]	24.4881	12.9092	17.8716	1.59983	0.444698	3.59756	0.000321214	0.00458129				0.027	0.012	0.009	0.192	0.104	0.095	0.049		0.016	0.11	6.875	2.78136
ENSMUSG00000038244	Mical2	microtubule associated monooxygenase, calponin and LIM domain containing 2 [Source:MGI Symbol;Acc:MGI:2444947]	87.076	67.6834	75.9945	1.69969	0.302656	5.61592	1.95515e-08	1.41263e-06				0.027	0.016	0.027	0.133	0.077	0.111	0.119		0.0233333	0.11	4.71429	2.23704
ENSMUSG00000039037	St6galnac5	ST6 (alpha-N-acetyl-neuraminyl-2,3-beta-galactosyl-1,3)-N-acetylgalactosaminide alpha-2,6-sialyltransferase 5 [Source:MGI Symbol;Acc:MGI:1349471]	101.787	82.7975	90.9357	2.42879	0.295294	8.22499	1.95203e-16	7.74209e-14				0.02	0.013	0.01	0.197	0.112	0.032	0.098		0.0143333	0.10975	7.65698	2.93677
ENSMUSG00000015354	Pcolce2	procollagen C-endopeptidase enhancer 2 [Source:MGI Symbol;Acc:MGI:1923727]	49.3378	26.0749	36.0447	1.25972	0.377473	3.33724	0.000846157	0.00907549				0.03	0.027	0.024	0.114	0.068	0.172	0.082		0.027	0.109	4.03704	2.0133
ENSMUSG00000007279	Scube2	signal peptide, CUB domain, EGF-like 2 [Source:MGI Symbol;Acc:MGI:1928765]	39.4983	32.6137	35.5642	2.17859	0.393038	5.54294	2.97432e-08	2.01616e-06				0.012	0.005	0.02	0.101	0.058	0.126	0.148		0.0123333	0.10825	8.77703	3.13373
ENSMUSG00000050150	Slc9b1	solute carrier family 9, subfamily B (NHA1, cation proton antiporter 1), member 1 [Source:MGI Symbol;Acc:MGI:1921696]	34.4926	22.791	27.806	1.61843	0.405714	3.98909	6.63275e-05	0.00133378				0.019	0.014	0.023	0.117	0.069	0.137	0.109		0.0186667	0.108	5.78571	2.5325
ENSMUSG00000070469	Adamtsl3	ADAMTS-like 3 [Source:MGI Symbol;Acc:MGI:3028499]	179.019	175.943	177.261	1.18079	0.23142	5.10238	3.35406e-07	1.62821e-05				0.047	0.033	0.034	0.129	0.092	0.082	0.126		0.038	0.10725	2.82237	1.49691
ENSMUSG00000064065	Ipcef1	interaction protein for cytohesin exchange factors 1 [Source:MGI Symbol;Acc:MGI:2444159]	103.976	109.095	106.901	1.08271	0.307174	3.52474	0.000423904	0.00556088				0.043	0.011	0.067	0.119	0.07	0.114	0.126		0.0403333	0.10725	2.65909	1.41093
ENSMUSG00000026413	Pkp1	plakophilin 1 [Source:MGI Symbol;Acc:MGI:1328359]	32.3187	20.0865	25.3289	1.86231	0.431675	4.31414	1.60223e-05	0.000430638				0.005	0.01	0.024	0.147	0.066	0.107	0.109		0.013	0.10725	8.25	3.04439
ENSMUSG00000031504	Rab20	RAB20, member RAS oncogene family [Source:MGI Symbol;Acc:MGI:102789]	18.8957	8.41818	12.9085	1.70404	0.46498	3.66477	0.000247562	0.00375187				0.01	0.006	0.011	0.172	0.075	0.116	0.063		0.009	0.1065	11.8333	3.56478
ENSMUSG00000026012	Cd28	CD28 antigen [Source:MGI Symbol;Acc:MGI:88327]	37.0886	26.1725	30.8509	1.71587	0.407076	4.21511	2.49659e-05	0.000616684				0.027	0.008	0.015	0.101	0.086	0.147	0.092		0.0166667	0.1065	6.39	2.67582
ENSMUSG00000071540	3425401B19Rik	RIKEN cDNA 3425401B19 gene [Source:MGI Symbol;Acc:MGI:3588196]	13.0103	14.5306	13.879	1.59063	0.461216	3.44878	0.000563128	0.00674632				0.01	0.015	0.011	0.04	0.127	0.136	0.121		0.012	0.106	8.83333	3.14296
ENSMUSG00000052353	Cemip	cell migration inducing protein, hyaluronan binding [Source:MGI Symbol;Acc:MGI:2443629]	104.333	76.5368	88.4496	1.54975	0.288245	5.37652	7.59413e-08	4.47427e-06				0.025	0.023	0.026	0.108	0.077	0.129	0.11		0.0246667	0.106	4.2973	2.10343
ENSMUSG00000071324	Armc2	armadillo repeat containing 2 [Source:MGI Symbol;Acc:MGI:1916449]	65.0936	59.1438	61.6937	1.27578	0.336204	3.79466	0.000147844	0.00252147				0.05	0.021	0.021	0.115	0.091	0.106	0.107		0.0306667	0.10475	3.41576	1.77221
ENSMUSG00000072295	Als2cr11	amyotrophic lateral sclerosis 2 (juvenile) chromosome region, candidate 11 (human) [Source:MGI Symbol;Acc:MGI:1920713]	28.9865	21.124	24.4937	1.40393	0.414927	3.38356	0.000715529	0.00802055				0.025	0.016	0.024	0.122	0.062	0.116	0.117		0.0216667	0.10425	4.81154	2.2665
ENSMUSG00000054889	Dsp	desmoplakin [Source:MGI Symbol;Acc:MGI:109611]	34.5414	19.3874	25.882	1.46309	0.417214	3.50681	0.000453506	0.00581018				0.022	0.015	0.024	0.159	0.085	0.111	0.062		0.0203333	0.10425	5.12705	2.35813
ENSMUSG00000002057	Foxn1	forkhead box N1 [Source:MGI Symbol;Acc:MGI:102949]	20.744	10.2589	14.7525	1.6474	0.461417	3.57032	0.000356551	0.00496005				0.006	0.013	0.013	0.16	0.095	0.105	0.055		0.0106667	0.10375	9.72656	3.28193
ENSMUSG00000020826	Nos2	nitric oxide synthase 2, inducible [Source:MGI Symbol;Acc:MGI:97361]	24.8212	17.6575	20.7276	1.58424	0.437341	3.62245	0.000291826	0.00426327				0.013	0.022	0.012	0.118	0.072	0.102	0.12		0.0156667	0.103	6.57447	2.71687
ENSMUSG00000055022	Cntn1	contactin 1 [Source:MGI Symbol;Acc:MGI:105980]	174.123	186.628	181.269	1.10259	0.254403	4.33404	1.46396e-05	0.000399557				0.058	0.018	0.045	0.137	0.087	0.077	0.11		0.0403333	0.10275	2.54752	1.34909
ENSMUSG00000024286	Ccny	cyclin Y [Source:MGI Symbol;Acc:MGI:1915224]	90.5504	78.1098	83.4415	0.996055	0.29483	3.3784	0.000729091	0.00813831				0.032	0.025	0.057	0.109	0.071	0.12	0.11		0.038	0.1025	2.69737	1.43155
ENSMUSG00000071454	Dtnb	dystrobrevin, beta [Source:MGI Symbol;Acc:MGI:1203728]	130.841	124.784	127.38	1.10461	0.259002	4.26488	2.00012e-05	0.000519279				0.026	0.029	0.055	0.101	0.072	0.107	0.129		0.0366667	0.10225	2.78864	1.47956
ENSMUSG00000031825	Crispld2	cysteine-rich secretory protein LCCL domain containing 2 [Source:MGI Symbol;Acc:MGI:1926142]	36.7671	31.4532	33.7306	1.363	0.398834	3.41746	0.000632093	0.00733677				0.046	0.009	0.021	0.134	0.085	0.095	0.094		0.0253333	0.102	4.02632	2.00946
ENSMUSG00000005268	Prlr	prolactin receptor [Source:MGI Symbol;Acc:MGI:97763]	117.962	78.5893	95.4632	1.53701	0.288853	5.32108	1.03153e-07	5.89836e-06				0.027	0.017	0.029	0.133	0.079	0.115	0.08		0.0243333	0.10175	4.18151	2.06402
ENSMUSG00000029423	Piwil1	piwi-like RNA-mediated gene silencing 1 [Source:MGI Symbol;Acc:MGI:1928897]	31.8186	23.835	27.2565	1.6316	0.408714	3.99203	6.55103e-05	0.00132311				0.021	0.016	0.014	0.122	0.113	0.095	0.064		0.017	0.0985	5.79412	2.53459
ENSMUSG00000032911	Cspg4	chondroitin sulfate proteoglycan 4 [Source:MGI Symbol;Acc:MGI:2153093]	28.0139	8.32246	16.7617	1.61294	0.456472	3.5335	0.0004101	0.00544106				0.01	0.016	0.008	0.19	0.068	0.109	0.026		0.0113333	0.09825	8.66912	3.11589
ENSMUSG00000024154	Gtf2a1l	general transcription factor IIA, 1-like [Source:MGI Symbol;Acc:MGI:1919078]	32.5266	15.9173	23.0356	1.67527	0.438854	3.81738	0.000134875	0.00233446				0.037	0.005	0.002	0.171	0.063	0.1	0.058		0.0146667	0.098	6.68182	2.74024
ENSMUSG00000063558	Aox1	aldehyde oxidase 1 [Source:MGI Symbol;Acc:MGI:88035]	37.1407	45.4636	41.8966	1.2957	0.372587	3.47758	0.000505955	0.00624099				0.029	0.011	0.04	0.084	0.081	0.093	0.133		0.0266667	0.09775	3.66562	1.87406
ENSMUSG00000005237	Dnah2	dynein, axonemal, heavy chain 2 [Source:MGI Symbol;Acc:MGI:107731]	69.656	55.5863	61.6162	2.30575	0.337166	6.83861	7.99637e-12	1.29661e-09				0.015	0.01	0.01	0.097	0.084	0.104	0.1		0.0116667	0.09625	8.25	3.04439
ENSMUSG00000022146	Osmr	oncostatin M receptor [Source:MGI Symbol;Acc:MGI:1330819]	37.5827	27.568	31.86	1.41653	0.391538	3.61786	0.000297049	0.00430917				0.025	0.014	0.025	0.098	0.074	0.125	0.088		0.0213333	0.09625	4.51172	2.17368
ENSMUSG00000028217	Cdh17	cadherin 17 [Source:MGI Symbol;Acc:MGI:1095414]	40.0861	24.557	31.2123	1.33041	0.400643	3.32069	0.000897968	0.00943043				0.017	0.023	0.027	0.141	0.078	0.094	0.072		0.0223333	0.09625	4.3097	2.10759
ENSMUSG00000034777	Vax2	ventral anterior homeobox 2 [Source:MGI Symbol;Acc:MGI:1346018]	22.1427	4.16787	11.8714	1.80408	0.469432	3.84312	0.000121482	0.00214853				0.01	0.006	0	0.2	0.039	0.117	0.025		0.00533333	0.09525	17.8594	4.15861
ENSMUSG00000026896	Ifih1	interferon induced with helicase C domain 1 [Source:MGI Symbol;Acc:MGI:1918836]	33.7638	18.4886	25.0351	1.45082	0.421797	3.43961	0.000582546	0.00693881				0.009	0.023	0.021	0.08	0.066	0.153	0.081		0.0176667	0.095	5.37736	2.4269
ENSMUSG00000005087	Cd44	CD44 antigen [Source:MGI Symbol;Acc:MGI:88338]	57.2193	40.4323	47.6267	1.30967	0.357947	3.65885	0.000253347	0.00381782				0.015	0.018	0.041	0.086	0.063	0.139	0.092		0.0246667	0.095	3.85135	1.94536
ENSMUSG00000040728	Esrp1	epithelial splicing regulatory protein 1 [Source:MGI Symbol;Acc:MGI:1917326]	27.7644	26.9314	27.2884	1.53331	0.408868	3.75014	0.000176735	0.00290522				0.022	0.008	0.024	0.093	0.062	0.096	0.128		0.018	0.09475	5.26389	2.39613
ENSMUSG00000040616	Tmem51	transmembrane protein 51 [Source:MGI Symbol;Acc:MGI:2384874]	29.7091	21.605	25.0782	1.77031	0.419639	4.21864	2.45776e-05	0.000609243				0.023	0.004	0.014	0.149	0.045	0.066	0.114		0.0136667	0.0935	6.84146	2.7743
ENSMUSG00000020866	Cacna1g	calcium channel, voltage-dependent, T type, alpha 1G subunit [Source:MGI Symbol;Acc:MGI:1201678]	40.7659	21.8939	29.9819	2.06157	0.411791	5.00635	5.54732e-07	2.54698e-05				0.02	0.002	0.01	0.146	0.048	0.097	0.082		0.0106667	0.09325	8.74219	3.12799
ENSMUSG00000020067	Mypn	myopalladin [Source:MGI Symbol;Acc:MGI:1916052]	48.47	41.6647	44.5813	1.46625	0.374729	3.91282	9.12247e-05	0.00171251				0.029	0.011	0.024	0.094	0.097	0.11	0.072		0.0213333	0.09325	4.37109	2.12799
ENSMUSG00000034057	Myrfl	myelin regulatory factor-like [Source:MGI Symbol;Acc:MGI:2685085]	63.8232	47.8089	54.6722	2.45148	0.349721	7.00982	2.38621e-12	4.36091e-10				0.012	0.007	0.01	0.106	0.077	0.094	0.094		0.00966667	0.09275	9.59483	3.26226
ENSMUSG00000031727	Pmfbp1	polyamine modulated factor 1 binding protein 1 [Source:MGI Symbol;Acc:MGI:1930136]	32.3927	15.2274	22.584	1.71895	0.429835	3.9991	6.35829e-05	0.00128972				0.012	0.01	0.016	0.117	0.061	0.133	0.06		0.0126667	0.09275	7.32237	2.87231
ENSMUSG00000039579	Grin3a	glutamate receptor ionotropic, NMDA3A [Source:MGI Symbol;Acc:MGI:1933206]	104.907	79.0656	90.1406	1.80983	0.316536	5.7176	1.08036e-08	8.42639e-07				0.024	0.008	0.023	0.13	0.086	0.084	0.07		0.0183333	0.0925	5.04545	2.33498
ENSMUSG00000032091	Tmprss4	transmembrane protease, serine 4 [Source:MGI Symbol;Acc:MGI:2384877]	18.4049	10.1169	13.6689	1.84147	0.463709	3.97119	7.15151e-05	0.00140921				0.008	0.005	0.006	0.1	0.03	0.125	0.115		0.00633333	0.0925	14.6053	3.86842
ENSMUSG00000037681	Esyt3	extended synaptotagmin-like protein 3 [Source:MGI Symbol;Acc:MGI:1098699]	27.2914	20.8863	23.6313	1.53452	0.423743	3.62136	0.000293063	0.00427129				0.011	0.021	0.018	0.083	0.119	0.111	0.056		0.0166667	0.09225	5.535	2.46858
ENSMUSG00000022938	Fam3b	family with sequence similarity 3, member B [Source:MGI Symbol;Acc:MGI:1270150]	18.3197	13.558	15.5987	1.60041	0.45807	3.49381	0.000476179	0.00600979				0.003	0.011	0.02	0.075	0.084	0.123	0.087		0.0113333	0.09225	8.13971	3.02498
ENSMUSG00000029822	Osbpl3	oxysterol binding protein-like 3 [Source:MGI Symbol;Acc:MGI:1918970]	99.6873	72.026	83.8808	1.39418	0.306279	4.55197	5.31458e-06	0.000172594				0.034	0.025	0.015	0.117	0.066	0.092	0.094		0.0246667	0.09225	3.73986	1.90299
ENSMUSG00000060477	Irak2	interleukin-1 receptor-associated kinase 2 [Source:MGI Symbol;Acc:MGI:2429603]	36.6205	18.8748	26.4801	1.65009	0.41371	3.98852	6.64857e-05	0.00133552				0.015	0.014	0.015	0.13	0.057	0.108	0.072		0.0146667	0.09175	6.25568	2.64517
ENSMUSG00000043541	Casc1	cancer susceptibility candidate 1 [Source:MGI Symbol;Acc:MGI:2444480]	21.0967	13.1206	16.5389	1.59734	0.45105	3.54139	0.000398032	0.00534947				0.012	0.015	0.008	0.075	0.068	0.135	0.087		0.0116667	0.09125	7.82143	2.96743
ENSMUSG00000051648	Kctd19	potassium channel tetramerisation domain containing 19 [Source:MGI Symbol;Acc:MGI:3045294]	15.0798	12.6662	13.7006	1.63316	0.462179	3.53361	0.000409923	0.00544106				0.008	0.003	0.019	0.083	0.05	0.107	0.125		0.01	0.09125	9.125	3.18982
ENSMUSG00000018634	Crhr1	corticotropin releasing hormone receptor 1 [Source:MGI Symbol;Acc:MGI:88498]	26.588	14.3905	19.618	1.64438	0.437506	3.75852	0.000170919	0.00283461				0.018	0.015	0.007	0.148	0.087	0.08	0.048		0.0133333	0.09075	6.80625	2.76686
ENSMUSG00000036030	Prtg	protogenin homolog (Gallus gallus) [Source:MGI Symbol;Acc:MGI:2444710]	68.329	38.5374	51.3053	1.85563	0.349127	5.31506	1.0662e-07	6.05944e-06				0.015	0.015	0.015	0.109	0.075	0.116	0.061		0.015	0.09025	6.01667	2.58896
ENSMUSG00000066406	Akap13	A kinase (PRKA) anchor protein 13 [Source:MGI Symbol;Acc:MGI:2676556]	161.317	155.879	158.21	1.26901	0.236673	5.36187	8.23664e-08	4.7683e-06				0.03	0.031	0.027	0.102	0.089	0.069	0.1		0.0293333	0.09	3.06818	1.61738
ENSMUSG00000026042	Col5a2	collagen, type V, alpha 2 [Source:MGI Symbol;Acc:MGI:88458]	67.0823	65.0551	65.9239	1.26611	0.311651	4.06257	4.85349e-05	0.00104233				0.028	0.023	0.03	0.098	0.077	0.078	0.105		0.027	0.0895	3.31481	1.72893
ENSMUSG00000078776	9530053A07Rik	RIKEN cDNA 9530053A07 gene [Source:MGI Symbol;Acc:MGI:2442118]	17.5416	14.1557	15.6068	1.6745	0.455085	3.67953	0.000233667	0.0035979				0.017	0.009	0.005	0.123	0.075	0.062	0.096		0.0103333	0.089	8.6129	3.1065
ENSMUSG00000033102	Cdc14b	CDC14 cell division cycle 14B [Source:MGI Symbol;Acc:MGI:2441808]	48.2406	34.6481	40.4734	1.30996	0.375696	3.48674	0.000488943	0.00611458				0.014	0.028	0.027	0.102	0.073	0.092	0.088		0.023	0.08875	3.8587	1.94811
ENSMUSG00000033688	1300017J02Rik	RIKEN cDNA 1300017J02 gene [Source:MGI Symbol;Acc:MGI:1919025]	27.1424	21.7719	24.0736	1.69135	0.443007	3.81789	0.0001346	0.00233188				0.002	0.01	0.025	0.11	0.045	0.074	0.124		0.0123333	0.08825	7.15541	2.83903
ENSMUSG00000028082	Sh3d19	SH3 domain protein D19 [Source:MGI Symbol;Acc:MGI:1350923]	72.4071	73.6876	73.1388	1.90336	0.312293	6.09479	1.09579e-09	1.05292e-07				0.018	0.011	0.018	0.087	0.069	0.078	0.118		0.0156667	0.088	5.61702	2.48981
ENSMUSG00000045629	Sh3tc2	SH3 domain and tetratricopeptide repeats 2 [Source:MGI Symbol;Acc:MGI:2444417]	36.8347	21.4508	28.0439	1.72011	0.420679	4.08888	4.33454e-05	0.000955085				0.011	0.009	0.02	0.12	0.08	0.101	0.05		0.0133333	0.08775	6.58125	2.71836
ENSMUSG00000032495	Lrrc2	leucine rich repeat containing 2 [Source:MGI Symbol;Acc:MGI:1921499]	14.7032	12.6371	13.5226	1.79944	0.462461	3.891	9.98336e-05	0.00183712				0.008	0.005	0.009	0.125	0.05	0.049	0.125		0.00733333	0.08725	11.8977	3.57261
ENSMUSG00000026994	Galnt3	UDP-N-acetyl-alpha-D-galactosamine:polypeptide N-acetylgalactosaminyltransferase 3 [Source:MGI Symbol;Acc:MGI:894695]	24.6297	13.2982	18.1545	1.74049	0.444641	3.91436	9.06432e-05	0.0017102				0.01	0.009	0.011	0.099	0.065	0.119	0.064		0.01	0.08675	8.675	3.11686
ENSMUSG00000078632	Lrrc37a	leucine rich repeat containing 37A [Source:MGI Symbol;Acc:MGI:2685097]	29.1402	16.6834	22.022	2.03581	0.441265	4.61357	3.95808e-06	0.00013588				0.008	0.003	0.013	0.137	0.067	0.079	0.064		0.008	0.08675	10.8438	3.43879
ENSMUSG00000074627	Mroh8	maestro heat-like repeat family member 8 [Source:MGI Symbol;Acc:MGI:3603828]	36.7361	27.9538	31.7176	1.70672	0.397563	4.29296	1.76306e-05	0.000466835				0.01	0.015	0.019	0.093	0.078	0.091	0.083		0.0146667	0.08625	5.88068	2.55598
ENSMUSG00000031563	Wwc2	WW, C2 and coiled-coil domain containing 2 [Source:MGI Symbol;Acc:MGI:1261872]	88.4055	78.2468	82.6006	1.16464	0.30246	3.85057	0.000117844	0.00209811				0.034	0.015	0.036	0.091	0.068	0.101	0.085		0.0283333	0.08625	3.04412	1.60602
ENSMUSG00000034416	Pkd1l2	polycystic kidney disease 1 like 2 [Source:MGI Symbol;Acc:MGI:2664668]	42.7226	34.2741	37.8949	1.93615	0.388937	4.97806	6.42248e-07	2.89182e-05				0.006	0.012	0.02	0.093	0.069	0.086	0.096		0.0126667	0.086	6.78947	2.7633
ENSMUSG00000044083	Efcab8	EF-hand calcium binding domain 8 [Source:MGI Symbol;Acc:MGI:3644206]	30.6921	26.2853	28.1739	1.68222	0.41003	4.10267	4.08416e-05	0.000907424				0.024	0.007	0.012	0.108	0.066	0.073	0.095		0.0143333	0.0855	5.96512	2.57655
ENSMUSG00000051984	Sec31b	Sec31 homolog B (S. cerevisiae) [Source:MGI Symbol;Acc:MGI:2685187]	18.2521	6.95307	11.7955	1.55703	0.468581	3.32287	0.000890959	0.00940451				0.006	0.013	0.003	0.109	0.053	0.123	0.055		0.00733333	0.085	11.5909	3.53492
ENSMUSG00000026321	Tnfrsf11a	tumor necrosis factor receptor superfamily, member 11a, NFKB activator [Source:MGI Symbol;Acc:MGI:1314891]	38.3888	21.5063	28.7416	1.80621	0.405602	4.45316	8.46171e-06	0.000254411				0.014	0.012	0.01	0.083	0.065	0.127	0.064		0.012	0.08475	7.0625	2.82018
ENSMUSG00000059481	Plg	plasminogen [Source:MGI Symbol;Acc:MGI:97620]	19.5999	16.0887	17.5935	1.53774	0.446967	3.44038	0.00058089	0.00692351				0.017	0.006	0.016	0.096	0.072	0.087	0.083		0.013	0.0845	6.5	2.70044
ENSMUSG00000027485	Bpifb1	BPI fold containing family B, member 1 [Source:MGI Symbol;Acc:MGI:2137431]	11.4354	11.2507	11.3298	2.00181	0.471203	4.2483	2.15396e-05	0.000551539				0	0	0.006	0.091	0.032	0.062	0.153		0.002	0.0845	42.25	5.40088
ENSMUSG00000024064	Galnt14	UDP-N-acetyl-alpha-D-galactosamine:polypeptide N-acetylgalactosaminyltransferase 14 [Source:MGI Symbol;Acc:MGI:1918935]	114.133	84.102	96.9724	1.75409	0.28084	6.24585	4.21499e-10	4.51561e-08				0.022	0.01	0.021	0.109	0.043	0.086	0.1		0.0176667	0.0845	4.78302	2.25792
ENSMUSG00000020395	Itk	IL2 inducible T cell kinase [Source:MGI Symbol;Acc:MGI:96621]	36.8377	21.7102	28.1934	1.4996	0.430225	3.48562	0.000490999	0.00611812				0.015	0.002	0.03	0.119	0.055	0.104	0.06		0.0156667	0.0845	5.39362	2.43125
ENSMUSG00000050211	Pla2g4e	phospholipase A2, group IVE [Source:MGI Symbol;Acc:MGI:1919144]	47.6446	27.2366	35.9829	1.33785	0.3908	3.42336	0.000618521	0.00722567				0.015	0.027	0.017	0.103	0.053	0.101	0.08		0.0196667	0.08425	4.2839	2.09892
ENSMUSG00000027860	Vangl1	vang-like 1 (van gogh, Drosophila) [Source:MGI Symbol;Acc:MGI:2159344]	26.0961	17.5759	21.2274	1.80567	0.444388	4.06327	4.83896e-05	0.00104161				0.02	0.003	0.006	0.085	0.056	0.112	0.084		0.00966667	0.08425	8.71552	3.12359
ENSMUSG00000031789	Cngb1	cyclic nucleotide gated channel beta 1 [Source:MGI Symbol;Acc:MGI:2664102]	45.5336	15.155	28.1744	1.51161	0.456764	3.3094	0.000934957	0.00969868				0.005	0.003	0.025	0.147	0.056	0.116	0.017		0.011	0.084	7.63636	2.93289
ENSMUSG00000037139	Myom3	myomesin family, member 3 [Source:MGI Symbol;Acc:MGI:2685280]	32.4198	17.0317	23.6266	1.66921	0.430889	3.87388	0.000107118	0.00194428				0.006	0.011	0.019	0.094	0.053	0.12	0.069		0.012	0.084	7	2.80735
ENSMUSG00000074570	Cass4	Cas scaffolding protein family member 4 [Source:MGI Symbol;Acc:MGI:2444482]	18.6027	16.1146	17.1809	1.57209	0.448005	3.50908	0.000449653	0.00577271				0.006	0.016	0.014	0.071	0.109	0.092	0.062		0.012	0.0835	6.95833	2.79874
ENSMUSG00000086596	Susd5	sushi domain containing 5 [Source:MGI Symbol;Acc:MGI:2685972]	18.2989	15.3949	16.6395	1.85854	0.463484	4.00993	6.07356e-05	0.00124415				0.013	0.006	0	0.054	0.106	0.112	0.06		0.00633333	0.083	13.1053	3.71207
ENSMUSG00000049571	Cfap46	cilia and flagella associated protein 46 [Source:MGI Symbol;Acc:MGI:2444387]	36.5915	34.5023	35.3977	1.82977	0.397646	4.60151	4.19438e-06	0.000142678				0.008	0.006	0.025	0.063	0.071	0.103	0.095		0.013	0.083	6.38462	2.6746
ENSMUSG00000026450	Chit1	chitinase 1 (chitotriosidase) [Source:MGI Symbol;Acc:MGI:1919134]	19.9025	12.3089	15.5633	2.14916	0.459254	4.67968	2.8732e-06	0.000103797				0.004	0.004	0.005	0.093	0.057	0.097	0.084		0.00433333	0.08275	19.0962	4.25521
ENSMUSG00000031876	Cmtm1	CKLF-like MARVEL transmembrane domain containing 1 [Source:MGI Symbol;Acc:MGI:2447159]	12.0127	10.6204	11.2171	1.76106	0.470848	3.74018	0.000183889	0.00299309				0.006	0	0.007	0.036	0.066	0.127	0.102		0.00433333	0.08275	19.0962	4.25521
ENSMUSG00000026072	Il1r1	interleukin 1 receptor, type I [Source:MGI Symbol;Acc:MGI:96545]	52.2457	30.2942	39.702	1.66108	0.382653	4.34095	1.4187e-05	0.000390224				0.013	0.021	0.01	0.099	0.059	0.097	0.076		0.0146667	0.08275	5.64205	2.49622
ENSMUSG00000037188	Grhl3	grainyhead-like 3 (Drosophila) [Source:MGI Symbol;Acc:MGI:2655333]	19.8661	7.29617	12.6833	1.61176	0.465985	3.45883	0.000542525	0.00655425				0.008	0.012	0.003	0.151	0.063	0.081	0.036		0.00766667	0.08275	10.7935	3.43209
ENSMUSG00000038011	Dnah10	dynein, axonemal, heavy chain 10 [Source:MGI Symbol;Acc:MGI:1860299]	54.2089	36.1592	43.8948	2.29569	0.38385	5.9807	2.22179e-09	2.05032e-07				0.013	0.009	0.004	0.099	0.061	0.086	0.083		0.00866667	0.08225	9.49038	3.24647
ENSMUSG00000068117	Mei1	meiotic double-stranded break formation protein 1 [Source:MGI Symbol;Acc:MGI:3028590]	30.0317	19.9085	24.247	1.44775	0.437222	3.31125	0.000928794	0.00965087				0.005	0.011	0.03	0.111	0.054	0.084	0.08		0.0153333	0.08225	5.36413	2.42334
ENSMUSG00000035435	Abca17	ATP-binding cassette, sub-family A (ABC1), member 17 [Source:MGI Symbol;Acc:MGI:3625331]	44.5594	31.649	37.182	1.68088	0.397992	4.22341	2.40636e-05	0.000601152				0.011	0.008	0.024	0.086	0.08	0.106	0.057		0.0143333	0.08225	5.73837	2.52064
ENSMUSG00000040298	Btbd16	BTB (POZ) domain containing 16 [Source:MGI Symbol;Acc:MGI:3045247]	22.5338	19.4165	20.7525	1.95964	0.437149	4.48277	7.36807e-06	0.000224793				0.008	0.004	0.013	0.096	0.057	0.071	0.105		0.00833333	0.08225	9.87	3.30305
ENSMUSG00000038473	Nos1ap	nitric oxide synthase 1 (neuronal) adaptor protein [Source:MGI Symbol;Acc:MGI:1917979]	148.312	130.461	138.111	1.15381	0.245865	4.69287	2.69393e-06	9.76996e-05				0.031	0.023	0.029	0.09	0.062	0.083	0.093		0.0276667	0.082	2.96386	1.56748
ENSMUSG00000014361	Mertk	c-mer proto-oncogene tyrosine kinase [Source:MGI Symbol;Acc:MGI:96965]	48.5366	45.8638	47.0093	1.40307	0.350323	4.00506	6.20012e-05	0.0012659				0.023	0.014	0.026	0.097	0.071	0.069	0.089		0.021	0.0815	3.88095	1.95641
ENSMUSG00000036661	Dennd3	DENN/MADD domain containing 3 [Source:MGI Symbol;Acc:MGI:2146009]	27.0844	22.4601	24.4419	1.65886	0.430161	3.85638	0.000115079	0.00205478				0.012	0.016	0.008	0.083	0.048	0.076	0.117		0.012	0.081	6.75	2.75489
ENSMUSG00000028763	Hspg2	perlecan (heparan sulfate proteoglycan 2) [Source:MGI Symbol;Acc:MGI:96257]	56.7447	33.9133	43.6982	1.53013	0.36512	4.19077	2.78007e-05	0.000669552				0.019	0.011	0.022	0.11	0.057	0.095	0.06		0.0173333	0.0805	4.64423	2.21544
ENSMUSG00000054580	Pla2r1	phospholipase A2 receptor 1 [Source:MGI Symbol;Acc:MGI:102468]	69.0998	52.6647	59.7083	1.48141	0.325063	4.55731	5.18123e-06	0.000169148				0.02	0.017	0.022	0.098	0.062	0.081	0.08		0.0196667	0.08025	4.08051	2.02875
ENSMUSG00000036523	Greb1	gene regulated by estrogen in breast cancer protein [Source:MGI Symbol;Acc:MGI:2149712]	66.5016	45.8932	54.7254	1.72015	0.339483	5.06699	4.04161e-07	1.90252e-05				0.022	0.012	0.012	0.092	0.061	0.094	0.073		0.0153333	0.08	5.21739	2.38333
ENSMUSG00000042010	Acacb	acetyl-Coenzyme A carboxylase beta [Source:MGI Symbol;Acc:MGI:2140940]	43.8897	40.8306	42.1416	2.00994	0.370083	5.43106	5.602e-08	3.49254e-06				0.007	0.012	0.015	0.072	0.068	0.079	0.1		0.0113333	0.07975	7.03676	2.81491
ENSMUSG00000050944	Efcab5	EF-hand calcium binding domain 5 [Source:MGI Symbol;Acc:MGI:2442440]	44.9721	42.3487	43.473	1.38849	0.368446	3.76849	0.000164241	0.00275048				0.025	0.006	0.03	0.092	0.05	0.079	0.098		0.0203333	0.07975	3.92213	1.97164
ENSMUSG00000022419	Deptor	DEP domain containing MTOR-interacting protein [Source:MGI Symbol;Acc:MGI:2146322]	74.2682	52.9181	62.0681	1.58088	0.340693	4.64019	3.48087e-06	0.000121058				0.012	0.019	0.018	0.079	0.044	0.096	0.1		0.0163333	0.07975	4.88265	2.28767
ENSMUSG00000022383	Ppara	peroxisome proliferator activated receptor alpha [Source:MGI Symbol;Acc:MGI:104740]	34.6704	22.6914	27.8253	1.70062	0.41273	4.12041	3.78202e-05	0.000849405				0.023	0.01	0.006	0.104	0.067	0.085	0.063		0.013	0.07975	6.13462	2.61697
ENSMUSG00000026971	Itgb6	integrin beta 6 [Source:MGI Symbol;Acc:MGI:96615]	67.5701	46.1041	55.3038	1.22797	0.333838	3.67834	0.000234761	0.00360774				0.028	0.019	0.021	0.084	0.072	0.105	0.053		0.0226667	0.0785	3.46324	1.79212
ENSMUSG00000038156	Spon1	spondin 1, (f-spondin) extracellular matrix protein [Source:MGI Symbol;Acc:MGI:2385287]	124.626	111.769	117.279	1.71268	0.268809	6.37137	1.87344e-10	2.16912e-08				0.016	0.016	0.021	0.096	0.058	0.06	0.099		0.0176667	0.07825	4.42925	2.14706
ENSMUSG00000003604	Aven	apoptosis, caspase activation inhibitor [Source:MGI Symbol;Acc:MGI:1921518]	66.6797	55.4523	60.264	1.4626	0.327879	4.46079	8.16585e-06	0.000245912				0.016	0.016	0.026	0.086	0.066	0.079	0.078		0.0193333	0.07725	3.99569	1.99844
ENSMUSG00000004098	Col5a3	collagen, type V, alpha 3 [Source:MGI Symbol;Acc:MGI:1858212]	18.8812	16.3582	17.4395	1.55583	0.459759	3.38401	0.000714356	0.00801705				0.015	0	0.015	0.073	0.059	0.092	0.085		0.01	0.07725	7.725	2.94953
ENSMUSG00000019785	Clvs2	clavesin 2 [Source:MGI Symbol;Acc:MGI:2443223]	61.0977	39.5175	48.7661	1.21365	0.344986	3.51796	0.000434875	0.00565307				0.031	0.019	0.016	0.093	0.056	0.096	0.062		0.022	0.07675	3.48864	1.80266
ENSMUSG00000034591	Slc41a2	solute carrier family 41, member 2 [Source:MGI Symbol;Acc:MGI:2442940]	63.4502	30.6668	44.7168	1.2998	0.367913	3.5329	0.000411022	0.00544941				0.02	0.02	0.017	0.115	0.037	0.094	0.061		0.019	0.07675	4.03947	2.01417
ENSMUSG00000079606	Gm595	predicted gene 595 [Source:MGI Symbol;Acc:MGI:2685441]	17.0746	11.1166	13.67	1.60679	0.464352	3.46029	0.000539596	0.00654391				0.012	0.002	0.011	0.099	0.073	0.084	0.05		0.00833333	0.0765	9.18	3.19849
ENSMUSG00000020627	Klhl29	kelch-like 29 [Source:MGI Symbol;Acc:MGI:2683857]	178.739	100.342	133.941	1.01084	0.258764	3.90642	9.36732e-05	0.0017518				0.032	0.023	0.026	0.113	0.047	0.094	0.052		0.027	0.0765	2.83333	1.5025
ENSMUSG00000038600	Atp6v0a4	ATPase, H+ transporting, lysosomal V0 subunit A4 [Source:MGI Symbol;Acc:MGI:2153480]	39.4786	20.6048	28.6936	1.92533	0.408506	4.7131	2.43981e-06	9.00603e-05				0.01	0.008	0.01	0.095	0.045	0.1	0.065		0.00933333	0.07625	8.16964	3.03027
ENSMUSG00000026601	Axdnd1	axonemal dynein light chain domain containing 1 [Source:MGI Symbol;Acc:MGI:1924602]	48.621	36.303	41.5821	1.27368	0.381255	3.34076	0.000835491	0.00899734				0.012	0.016	0.033	0.091	0.069	0.085	0.06		0.0203333	0.07625	3.75	1.90689
ENSMUSG00000026786	Apbb1ip	amyloid beta (A4) precursor protein-binding, family B, member 1 interacting protein [Source:MGI Symbol;Acc:MGI:1861354]	48.6448	34.8358	40.7539	1.53899	0.380256	4.04724	5.18261e-05	0.00109783				0.025	0.013	0.008	0.092	0.046	0.081	0.085		0.0153333	0.076	4.95652	2.30933
ENSMUSG00000034656	Cacna1a	calcium channel, voltage-dependent, P/Q type, alpha 1A subunit [Source:MGI Symbol;Acc:MGI:109482]	131.243	90.2485	107.817	1.3515	0.282418	4.78547	1.7059e-06	6.59744e-05				0.02	0.017	0.027	0.098	0.063	0.085	0.058		0.0213333	0.076	3.5625	1.83289
ENSMUSG00000046637	Ttc34	tetratricopeptide repeat domain 34 [Source:MGI Symbol;Acc:MGI:2445205]	13.7703	8.28588	10.6364	1.69631	0.470276	3.60705	0.000309694	0.00445448				0.003	0.005	0.006	0.111	0.051	0.066	0.076		0.00466667	0.076	16.2857	4.02554
ENSMUSG00000005611	Mrvi1	MRV integration site 1 [Source:MGI Symbol;Acc:MGI:1338023]	54.2018	30.5253	40.6724	2.25074	0.40341	5.57929	2.415e-08	1.69241e-06				0.004	0.011	0.006	0.085	0.041	0.088	0.081		0.007	0.07375	10.5357	3.39722
ENSMUSG00000044749	Abca6	ATP-binding cassette, sub-family A (ABC1), member 6 [Source:MGI Symbol;Acc:MGI:1923434]	34.167	23.3181	27.9676	1.72265	0.416706	4.13397	3.5655e-05	0.000815515				0.007	0.009	0.018	0.098	0.061	0.07	0.063		0.0113333	0.073	6.44118	2.68732
ENSMUSG00000038764	Ptpn3	protein tyrosine phosphatase, non-receptor type 3 [Source:MGI Symbol;Acc:MGI:105307]	58.7498	32.1914	43.5736	1.35832	0.366681	3.70436	0.000211927	0.00333378				0.019	0.011	0.022	0.112	0.027	0.083	0.069		0.0173333	0.07275	4.19712	2.0694
ENSMUSG00000063531	Sema3e	sema domain, immunoglobulin domain (Ig), short basic domain, secreted, (semaphorin) 3E [Source:MGI Symbol;Acc:MGI:1340034]	95.0263	68.3113	79.7606	3.19238	0.3252	9.81665	9.5462e-23	8.89754e-20				0.006	0.004	0.004	0.114	0.07	0.044	0.063		0.00466667	0.07275	15.5893	3.96248
ENSMUSG00000034107	Ano7	anoctamin 7 [Source:MGI Symbol;Acc:MGI:3052714]	16.3767	5.05738	9.90851	1.84966	0.471415	3.92363	8.72241e-05	0.00165575				0.003	0	0.003	0.109	0.038	0.105	0.037		0.002	0.07225	36.125	5.17493
ENSMUSG00000055994	Nod2	nucleotide-binding oligomerization domain containing 2 [Source:MGI Symbol;Acc:MGI:2429397]	16.0439	13.6745	14.69	1.7251	0.457795	3.76829	0.000164371	0.00275048				0.01	0.008	0.005	0.091	0.074	0.053	0.071		0.00766667	0.07225	9.42391	3.23633
ENSMUSG00000054672	5830411N06Rik	RIKEN cDNA 5830411N06 gene [Source:MGI Symbol;Acc:MGI:2443685]	20.5328	17.1036	18.5732	1.79757	0.442997	4.05775	4.95468e-05	0.00106161				0.01	0.004	0.011	0.089	0.043	0.061	0.095		0.00833333	0.072	8.64	3.11103
ENSMUSG00000032380	Dapk2	death-associated protein kinase 2 [Source:MGI Symbol;Acc:MGI:1341297]	45.8604	35.0148	39.6629	2.3632	0.404809	5.83782	5.28871e-09	4.42093e-07				0.002	0.006	0.012	0.08	0.05	0.071	0.087		0.00666667	0.072	10.8	3.43296
ENSMUSG00000038836	Agbl3	ATP/GTP binding protein-like 3 [Source:MGI Symbol;Acc:MGI:1923473]	36.5904	25.07	30.0073	1.4684	0.406133	3.61558	0.000299679	0.0043372				0.01	0.013	0.022	0.097	0.057	0.07	0.063		0.015	0.07175	4.78333	2.25802
ENSMUSG00000037375	Hhat	hedgehog acyltransferase [Source:MGI Symbol;Acc:MGI:2444681]	129.069	94.6458	109.398	1.44208	0.274802	5.24771	1.54001e-07	8.41858e-06				0.023	0.011	0.022	0.083	0.053	0.088	0.063		0.0186667	0.07175	3.84375	1.94251
ENSMUSG00000018168	Ikzf3	IKAROS family zinc finger 3 [Source:MGI Symbol;Acc:MGI:1342542]	39.5463	23.5115	30.3835	1.56811	0.399243	3.9277	8.57604e-05	0.00163629				0.017	0.008	0.015	0.081	0.049	0.101	0.056		0.0133333	0.07175	5.38125	2.42794
ENSMUSG00000030134	Rasgef1a	RasGEF domain family, member 1A [Source:MGI Symbol;Acc:MGI:1917977]	35.6334	19.0056	26.1318	2.42162	0.450437	5.37617	7.60873e-08	4.47427e-06				0	0.006	0.004	0.094	0.038	0.075	0.076		0.00333333	0.07075	21.225	4.40769
ENSMUSG00000022237	Ankrd33b	ankyrin repeat domain 33B [Source:MGI Symbol;Acc:MGI:1917904]	32.0295	21.6754	26.1129	2.19889	0.424537	5.1795	2.22477e-07	1.14881e-05				0.011	0.003	0.005	0.098	0.061	0.064	0.059		0.00633333	0.0705	11.1316	3.47659
ENSMUSG00000027070	Lrp2	low density lipoprotein receptor-related protein 2 [Source:MGI Symbol;Acc:MGI:95794]	63.5647	58.9471	60.926	1.62495	0.324054	5.01444	5.31877e-07	2.45524e-05				0.015	0.012	0.019	0.067	0.057	0.073	0.084		0.0153333	0.07025	4.58152	2.19583
ENSMUSG00000019846	Lama4	laminin, alpha 4 [Source:MGI Symbol;Acc:MGI:109321]	68.2111	52.6148	59.2989	1.0756	0.324139	3.31832	0.000905616	0.00948937				0.02	0.022	0.027	0.073	0.061	0.084	0.062		0.023	0.07	3.04348	1.60572
ENSMUSG00000004415	Col26a1	collagen, type XXVI, alpha 1 [Source:MGI Symbol;Acc:MGI:2155345]	71.3219	34.2214	50.1216	1.88552	0.363551	5.1864	2.14403e-07	1.11952e-05				0.021	0.007	0.006	0.112	0.065	0.079	0.021		0.0113333	0.06925	6.11029	2.61124
ENSMUSG00000025558	Dock9	dedicator of cytokinesis 9 [Source:MGI Symbol;Acc:MGI:106321]	116.876	86.3595	99.4379	1.37981	0.281705	4.89805	9.67908e-07	4.09133e-05				0.032	0.013	0.014	0.103	0.043	0.06	0.07		0.0196667	0.069	3.50847	1.81084
ENSMUSG00000055632	Hmcn2	hemicentin 2 [Source:MGI Symbol;Acc:MGI:2677838]	59.1212	44.8551	50.9692	1.8763	0.367719	5.10255	3.35105e-07	1.62821e-05				0.01	0.004	0.019	0.064	0.053	0.09	0.065		0.011	0.068	6.18182	2.62803
ENSMUSG00000046768	Rhoj	ras homolog gene family, member J [Source:MGI Symbol;Acc:MGI:1931551]	38.4847	29.4158	33.3025	1.58788	0.387825	4.09432	4.23413e-05	0.000936281				0.011	0.015	0.012	0.056	0.06	0.087	0.068		0.0126667	0.06775	5.34868	2.41918
ENSMUSG00000034087	Nlrp4b	NLR family, pyrin domain containing 4B [Source:MGI Symbol;Acc:MGI:3056570]	14.2737	13.881	14.0493	1.69185	0.461165	3.66864	0.000243846	0.00371057				0.008	0.004	0.009	0.071	0.076	0.058	0.064		0.007	0.06725	9.60714	3.26411
ENSMUSG00000004872	Pax3	paired box 3 [Source:MGI Symbol;Acc:MGI:97487]	45.5911	26.7961	34.8511	1.27673	0.381668	3.34514	0.000822417	0.00892356				0.021	0.01	0.02	0.085	0.039	0.091	0.052		0.017	0.06675	3.92647	1.97323
ENSMUSG00000002250	Ppard	peroxisome proliferator activator receptor delta [Source:MGI Symbol;Acc:MGI:101884]	30.3489	19.4021	24.0936	1.46063	0.419529	3.48159	0.000498454	0.00616977				0.023	0.01	0.007	0.105	0.048	0.057	0.056		0.0133333	0.0665	4.9875	2.31832
ENSMUSG00000005397	Nid1	nidogen 1 [Source:MGI Symbol;Acc:MGI:97342]	35.3173	15.579	24.0383	1.84182	0.445795	4.13154	3.60345e-05	0.000822179				0.002	0.011	0.006	0.098	0.033	0.074	0.06		0.00633333	0.06625	10.4605	3.38688
ENSMUSG00000050994	Adgb	androglobin [Source:MGI Symbol;Acc:MGI:3605549]	51.7951	47.3773	49.2706	1.46966	0.362525	4.05395	5.03606e-05	0.00107288				0.012	0.007	0.029	0.065	0.053	0.075	0.071		0.016	0.066	4.125	2.04439
ENSMUSG00000041592	Sdk2	sidekick homolog 2 (chicken) [Source:MGI Symbol;Acc:MGI:2443847]	119.606	78.4848	96.1083	2.2687	0.290659	7.80535	5.93378e-15	1.86019e-12				0.009	0.009	0.009	0.069	0.048	0.082	0.065		0.009	0.066	7.33333	2.87447
ENSMUSG00000005947	Itgae	integrin alpha E, epithelial-associated [Source:MGI Symbol;Acc:MGI:1298377]	23.521	15.762	19.0873	1.51542	0.439029	3.45175	0.000556959	0.00669627				0.009	0.01	0.013	0.084	0.043	0.067	0.068		0.0106667	0.0655	6.14063	2.61839
ENSMUSG00000030307	Slc6a11	solute carrier family 6 (neurotransmitter transporter, GABA), member 11 [Source:MGI Symbol;Acc:MGI:95630]	46.3005	36.0652	40.4518	1.49899	0.391507	3.82878	0.000128781	0.00226047				0.011	0.013	0.014	0.078	0.022	0.059	0.101		0.0126667	0.065	5.13158	2.3594
ENSMUSG00000033987	Dnah17	dynein, axonemal, heavy chain 17 [Source:MGI Symbol;Acc:MGI:1917176]	49.7201	23.7955	34.906	1.94715	0.39094	4.98069	6.33587e-07	2.87365e-05				0.011	0.009	0.005	0.092	0.045	0.078	0.044		0.00833333	0.06475	7.77	2.95791
ENSMUSG00000072487	Mroh5	maestro heat-like repeat family member 5 [Source:MGI Symbol;Acc:MGI:2685474]	27.393	22.02	24.3227	1.94869	0.436145	4.46799	7.89564e-06	0.000238546				0.006	0.001	0.015	0.065	0.041	0.072	0.075		0.00733333	0.06325	8.625	3.10852
ENSMUSG00000079259	Trim71	tripartite motif-containing 71 [Source:MGI Symbol;Acc:MGI:2685973]	25.5157	13.38	18.581	1.48237	0.446666	3.31874	0.00090424	0.00948028				0.009	0.009	0.012	0.102	0.061	0.062	0.028		0.01	0.06325	6.325	2.66107
ENSMUSG00000040852	Plekhh2	pleckstrin homology domain containing, family H (with MyTH4 domain) member 2 [Source:MGI Symbol;Acc:MGI:2146813]	44.6779	28.704	35.55	1.71819	0.392118	4.38184	1.17683e-05	0.000332888				0.012	0.006	0.014	0.063	0.053	0.09	0.045		0.0106667	0.06275	5.88281	2.55651
ENSMUSG00000079465	Col4a3	collagen, type IV, alpha 3 [Source:MGI Symbol;Acc:MGI:104688]	61.7644	35.3428	46.6663	1.28192	0.350314	3.65934	0.000252864	0.00381672				0.019	0.015	0.016	0.077	0.044	0.084	0.045		0.0166667	0.0625	3.75	1.90689
ENSMUSG00000075324	Fign	fidgetin [Source:MGI Symbol;Acc:MGI:1890647]	51.9093	38.2509	44.1045	1.29062	0.381005	3.38742	0.000705532	0.00794193				0.012	0.009	0.031	0.091	0.044	0.06	0.055		0.0173333	0.0625	3.60577	1.85031
ENSMUSG00000034177	Rnf43	ring finger protein 43 [Source:MGI Symbol;Acc:MGI:2442609]	28.1117	18.4329	22.581	1.85292	0.437051	4.2396	2.23914e-05	0.000567889				0.007	0.004	0.011	0.078	0.065	0.069	0.037		0.00733333	0.06225	8.48864	3.08553
ENSMUSG00000030616	Sytl2	synaptotagmin-like 2 [Source:MGI Symbol;Acc:MGI:1933366]	38.9369	32.7419	35.3969	1.59597	0.393866	4.05207	5.07667e-05	0.00107784				0.018	0.006	0.011	0.055	0.054	0.078	0.06		0.0116667	0.06175	5.29286	2.40405
ENSMUSG00000075249	Fsip2	fibrous sheath-interacting protein 2 [Source:MGI Symbol;Acc:MGI:2664111]	23.1767	17.0635	19.6834	1.92126	0.44221	4.34469	1.39474e-05	0.000385176				0.005	0.005	0.009	0.067	0.06	0.067	0.052		0.00633333	0.0615	9.71053	3.27955
ENSMUSG00000037490	Slc2a12	solute carrier family 2 (facilitated glucose transporter), member 12 [Source:MGI Symbol;Acc:MGI:3052471]	27.4659	11.0186	18.0674	1.54377	0.447978	3.44607	0.000568797	0.00680112				0.009	0.01	0.006	0.104	0.032	0.066	0.042		0.00833333	0.061	7.32	2.87184
ENSMUSG00000061186	Sfmbt2	Scm-like with four mbt domains 2 [Source:MGI Symbol;Acc:MGI:2447794]	93.2685	62.0403	75.4238	1.43427	0.313799	4.57067	4.86161e-06	0.000160399				0.016	0.007	0.024	0.076	0.033	0.078	0.057		0.0156667	0.061	3.89362	1.96111
ENSMUSG00000057058	Skap1	src family associated phosphoprotein 1 [Source:MGI Symbol;Acc:MGI:1925723]	101.827	89.2408	94.6349	1.83791	0.303455	6.05662	1.39011e-09	1.30874e-07				0.018	0.005	0.012	0.061	0.041	0.068	0.074		0.0116667	0.061	5.22857	2.38642
ENSMUSG00000055493	Epm2a	epilepsy, progressive myoclonic epilepsy, type 2 gene alpha [Source:MGI Symbol;Acc:MGI:1341085]	40.4178	32.8285	36.0811	1.70507	0.388514	4.38871	1.14026e-05	0.000324018				0.016	0.005	0.01	0.062	0.026	0.068	0.086		0.0103333	0.0605	5.85484	2.54963
ENSMUSG00000032087	Dscaml1	Down syndrome cell adhesion molecule like 1 [Source:MGI Symbol;Acc:MGI:2150309]	134.999	108.337	119.763	0.871387	0.262112	3.32449	0.000885807	0.00936604				0.027	0.026	0.021	0.066	0.047	0.065	0.063		0.0246667	0.06025	2.44257	1.2884
ENSMUSG00000066952	Myo1h	myosin 1H [Source:MGI Symbol;Acc:MGI:1914674]	22.1044	24.3316	23.3771	1.67052	0.425718	3.924	8.709e-05	0.00165489				0.008	0.003	0.018	0.051	0.032	0.059	0.098		0.00966667	0.06	6.2069	2.63387
ENSMUSG00000050556	Kcnb1	potassium voltage gated channel, Shab-related subfamily, member 1 [Source:MGI Symbol;Acc:MGI:96666]	40.004	22.7957	30.1707	1.41397	0.405274	3.48893	0.000484958	0.00608761				0.016	0.013	0.009	0.084	0.071	0.066	0.017		0.0126667	0.0595	4.69737	2.23185
ENSMUSG00000018830	Myh11	myosin, heavy polypeptide 11, smooth muscle [Source:MGI Symbol;Acc:MGI:102643]	35.8279	23.8	28.9548	1.80918	0.40674	4.448	8.6673e-06	0.000258922				0.009	0.006	0.012	0.084	0.041	0.056	0.056		0.009	0.05925	6.58333	2.71882
ENSMUSG00000022032	Scara5	scavenger receptor class A, member 5 (putative) [Source:MGI Symbol;Acc:MGI:1918395]	28.7255	29.4078	29.1154	1.95243	0.419147	4.65809	3.19155e-06	0.000112891				0.005	0.011	0.005	0.062	0.047	0.038	0.09		0.007	0.05925	8.46429	3.08139
ENSMUSG00000005580	Adcy9	adenylate cyclase 9 [Source:MGI Symbol;Acc:MGI:108450]	49.2356	39.5884	43.7229	1.28718	0.370445	3.47468	0.000511461	0.00628072				0.01	0.015	0.022	0.083	0.04	0.043	0.07		0.0156667	0.059	3.76596	1.91302
ENSMUSG00000015133	Lrrk1	leucine-rich repeat kinase 1 [Source:MGI Symbol;Acc:MGI:2142227]	62.7624	44.9295	52.5722	1.30097	0.352534	3.69033	0.00022396	0.00349067				0.016	0.008	0.024	0.082	0.041	0.061	0.049		0.016	0.05825	3.64062	1.86419
ENSMUSG00000029648	Flt1	FMS-like tyrosine kinase 1 [Source:MGI Symbol;Acc:MGI:95558]	75.8998	27.3615	48.1636	1.79648	0.375247	4.78746	1.68902e-06	6.5594e-05				0.006	0.009	0.01	0.068	0.038	0.101	0.025		0.00833333	0.058	6.96	2.79909
ENSMUSG00000057719	Sh3rf2	SH3 domain containing ring finger 2 [Source:MGI Symbol;Acc:MGI:2444628]	38.526	26.979	31.9277	1.6108	0.392803	4.10077	4.11774e-05	0.000913795				0.01	0.009	0.014	0.066	0.043	0.067	0.056		0.011	0.058	5.27273	2.39855
ENSMUSG00000063430	Wscd2	WSC domain containing 2 [Source:MGI Symbol;Acc:MGI:2445030]	29.2662	29.0161	29.1233	1.86659	0.413559	4.51349	6.37709e-06	0.000199791				0.014	0.005	0.005	0.066	0.05	0.043	0.073		0.008	0.058	7.25	2.85798
ENSMUSG00000031461	Myom2	myomesin 2 [Source:MGI Symbol;Acc:MGI:1328358]	25.2528	19.6534	22.0531	1.64704	0.434227	3.79305	0.000148811	0.00253563				0.008	0.01	0.006	0.053	0.035	0.064	0.077		0.008	0.05725	7.15625	2.8392
ENSMUSG00000034990	Otoa	otoancorin [Source:MGI Symbol;Acc:MGI:2149209]	34.6299	14.9638	23.3921	1.55371	0.425846	3.64852	0.000263758	0.00392401				0.013	0.01	0.005	0.088	0.034	0.066	0.036		0.00933333	0.056	6	2.58496
ENSMUSG00000020023	Tmcc3	transmembrane and coiled coil domains 3 [Source:MGI Symbol;Acc:MGI:2442900]	93.0845	82.4388	87.0012	1.43983	0.314404	4.57953	4.66015e-06	0.000155125				0.012	0.009	0.024	0.071	0.051	0.049	0.052		0.015	0.05575	3.71667	1.89401
ENSMUSG00000020901	Pik3r5	phosphoinositide-3-kinase, regulatory subunit 5, p101 [Source:MGI Symbol;Acc:MGI:2443588]	22.7751	14.1514	17.8473	1.76909	0.448622	3.94338	8.03397e-05	0.00155677				0.009	0.002	0.007	0.071	0.042	0.063	0.045		0.006	0.05525	9.20833	3.20294
ENSMUSG00000043003	Rasef	RAS and EF hand domain containing [Source:MGI Symbol;Acc:MGI:2448565]	19.5385	22.8903	21.4538	1.63263	0.433514	3.76605	0.000165853	0.00277031				0.009	0.003	0.014	0.049	0.04	0.048	0.083		0.00866667	0.055	6.34615	2.66588
ENSMUSG00000037801	Iqch	IQ motif containing H [Source:MGI Symbol;Acc:MGI:1925500]	62.9675	41.9998	50.986	1.86868	0.350015	5.33887	9.35297e-08	5.38114e-06				0.012	0.007	0.008	0.054	0.045	0.074	0.046		0.009	0.05475	6.08333	2.60486
ENSMUSG00000032702	Kank1	KN motif and ankyrin repeat domains 1 [Source:MGI Symbol;Acc:MGI:2147707]	66.0232	46.7373	55.0027	1.98186	0.367702	5.38986	7.05137e-08	4.24015e-06				0.005	0.014	0.006	0.084	0.054	0.03	0.049		0.00833333	0.05425	6.51	2.70266
ENSMUSG00000003418	St8sia6	ST8 alpha-N-acetyl-neuraminide alpha-2,8-sialyltransferase 6 [Source:MGI Symbol;Acc:MGI:2386797]	52.9721	35.0343	42.7219	1.24875	0.360381	3.46508	0.000530074	0.00645824				0.011	0.017	0.014	0.039	0.041	0.085	0.051		0.014	0.054	3.85714	1.94753
ENSMUSG00000055415	Atp10b	ATPase, class V, type 10B [Source:MGI Symbol;Acc:MGI:2442688]	26.3832	34.7939	31.1893	1.79886	0.408043	4.40851	1.04087e-05	0.000300352				0.012	0.004	0.009	0.049	0.052	0.038	0.076		0.00833333	0.05375	6.45	2.6893
ENSMUSG00000026109	Tmeff2	transmembrane protein with EGF-like and two follistatin-like domains 2 [Source:MGI Symbol;Acc:MGI:1861735]	54.88	106.949	84.6337	1.47081	0.347595	4.23141	2.32234e-05	0.000584754				0.018	0.006	0.016	0.037	0.066	0.032	0.078		0.0133333	0.05325	3.99375	1.99774
ENSMUSG00000030621	Me3	malic enzyme 3, NADP(+)-dependent, mitochondrial [Source:MGI Symbol;Acc:MGI:1916679]	74.0816	53.6836	62.4256	1.67362	0.350379	4.77661	1.78279e-06	6.86632e-05				0.018	0.005	0.009	0.048	0.046	0.077	0.042		0.0106667	0.05325	4.99219	2.31967
ENSMUSG00000020182	Ddc	dopa decarboxylase [Source:MGI Symbol;Acc:MGI:94876]	25.0491	21.6523	23.1081	1.46851	0.430735	3.40931	0.00065127	0.00750793				0.005	0.013	0.01	0.048	0.033	0.052	0.078		0.00933333	0.05275	5.65179	2.49871
ENSMUSG00000037921	Ddx60	DEAD (Asp-Glu-Ala-Asp) box polypeptide 60 [Source:MGI Symbol;Acc:MGI:2384570]	37.9925	27.1048	31.7709	1.28284	0.388319	3.30357	0.000954626	0.00981533				0.016	0.011	0.014	0.068	0.042	0.055	0.045		0.0136667	0.0525	3.84146	1.94166
ENSMUSG00000032845	Alpk2	alpha-kinase 2 [Source:MGI Symbol;Acc:MGI:2449492]	35.6222	32.0635	33.5887	2.03416	0.395515	5.14307	2.70291e-07	1.36544e-05				0.004	0.005	0.01	0.043	0.047	0.059	0.06		0.00633333	0.05225	8.25	3.04439
ENSMUSG00000030523	Trpm1	transient receptor potential cation channel, subfamily M, member 1 [Source:MGI Symbol;Acc:MGI:1330305]	44.6746	20.3833	30.7939	1.57096	0.436906	3.59566	0.000323573	0.00460086				0.007	0.002	0.015	0.067	0.042	0.082	0.018		0.008	0.05225	6.53125	2.70736
ENSMUSG00000058806	Col13a1	collagen, type XIII, alpha 1 [Source:MGI Symbol;Acc:MGI:1277201]	48.2391	31.5138	38.6818	1.56538	0.371382	4.21501	2.4977e-05	0.000616684				0.012	0.008	0.012	0.062	0.032	0.063	0.051		0.0106667	0.052	4.875	2.2854
ENSMUSG00000034037	Fgd5	FYVE, RhoGEF and PH domain containing 5 [Source:MGI Symbol;Acc:MGI:2443369]	29.8789	20.5457	24.5457	1.96187	0.440722	4.45148	8.52793e-06	0.000255989				0.005	0.009	0.001	0.065	0.039	0.045	0.058		0.005	0.05175	10.35	3.37156
ENSMUSG00000036027	1810046K07Rik	RIKEN cDNA 1810046K07 gene [Source:MGI Symbol;Acc:MGI:1917059]	13.4762	6.21711	9.32813	1.60002	0.471006	3.39702	0.000681248	0.00775758				0.002	0.004	0	0.027	0.019	0.103	0.058		0.002	0.05175	25.875	4.69349
ENSMUSG00000091345	Col6a5	collagen, type VI, alpha 5 [Source:MGI Symbol;Acc:MGI:3648134]	32.3552	24.499	27.8659	1.58667	0.426958	3.71622	0.000202225	0.0032137				0.007	0.002	0.018	0.057	0.039	0.062	0.048		0.009	0.0515	5.72222	2.51658
ENSMUSG00000084989	Crocc2	ciliary rootlet coiled-coil, rootletin family member 2 [Source:MGI Symbol;Acc:MGI:3045962]	20.4443	12.5164	15.9141	1.53993	0.4593	3.35278	0.000800049	0.00873679				0.007	0.001	0.012	0.079	0.037	0.049	0.04		0.00666667	0.05125	7.6875	2.94251
ENSMUSG00000052861	Dnah6	dynein, axonemal, heavy chain 6 [Source:MGI Symbol;Acc:MGI:107744]	64.3436	51.2716	56.8739	1.52505	0.331678	4.59798	4.266e-06	0.000144586				0.014	0.008	0.013	0.053	0.036	0.06	0.056		0.0116667	0.05125	4.39286	2.13516
ENSMUSG00000061048	Cdh3	cadherin 3 [Source:MGI Symbol;Acc:MGI:88356]	17.1694	6.72144	11.1991	1.59517	0.468498	3.40486	0.000661968	0.00758903				0.006	0.005	0.002	0.055	0.033	0.085	0.029		0.00433333	0.0505	11.6538	3.54273
ENSMUSG00000032572	Col6a4	collagen, type VI, alpha 4 [Source:MGI Symbol;Acc:MGI:1915803]	31.284	26.2298	28.3959	1.50383	0.406094	3.70315	0.000212936	0.00334402				0.012	0.006	0.012	0.059	0.045	0.049	0.046		0.01	0.04975	4.975	2.3147
ENSMUSG00000009734	Pou6f2	POU domain, class 6, transcription factor 2 [Source:MGI Symbol;Acc:MGI:2443631]	73.183	66.8167	69.5451	1.73545	0.317663	5.46319	4.67647e-08	2.97523e-06				0.011	0.007	0.012	0.052	0.049	0.049	0.049		0.01	0.04975	4.975	2.3147
ENSMUSG00000054509	Parp4	poly (ADP-ribose) polymerase family, member 4 [Source:MGI Symbol;Acc:MGI:2685589]	25.3205	19.3091	21.8854	1.41183	0.425131	3.32092	0.000897205	0.00943026				0.009	0.009	0.01	0.041	0.04	0.065	0.051		0.00933333	0.04925	5.27679	2.39966
ENSMUSG00000049985	Ankrd55	ankyrin repeat domain 55 [Source:MGI Symbol;Acc:MGI:1924568]	25.7228	22.0058	23.5988	1.62653	0.428883	3.79247	0.000149156	0.00253919				0.011	0.006	0.005	0.052	0.028	0.046	0.069		0.00733333	0.04875	6.64773	2.73286
ENSMUSG00000032656	2016-03-03	membrane-associated ring finger (C3HC4) 3 [Source:MGI Symbol;Acc:MGI:2443667]	47.1677	31.4583	38.1909	2.17863	0.38624	5.6406	1.69461e-08	1.25229e-06				0.005	0.004	0.007	0.061	0.026	0.047	0.057		0.00533333	0.04775	8.95312	3.16239
ENSMUSG00000070780	Rbm47	RNA binding motif protein 47 [Source:MGI Symbol;Acc:MGI:2384294]	46.9472	27.952	36.0928	2.12283	0.418754	5.06941	3.99058e-07	1.88325e-05				0.001	0.006	0.007	0.068	0.038	0.043	0.04		0.00466667	0.04725	10.125	3.33985
ENSMUSG00000019768	Esr1	estrogen receptor 1 (alpha) [Source:MGI Symbol;Acc:MGI:1352467]	133.136	76.0363	100.508	1.60799	0.279144	5.76043	8.39009e-09	6.6553e-07				0.014	0.008	0.009	0.062	0.036	0.061	0.03		0.0103333	0.04725	4.57258	2.19301
ENSMUSG00000066687	Zbtb16	zinc finger and BTB domain containing 16 [Source:MGI Symbol;Acc:MGI:103222]	49.1085	35.4938	41.3287	2.084	0.384103	5.42563	5.77497e-08	3.58837e-06				0.005	0.006	0.006	0.06	0.027	0.038	0.058		0.00566667	0.04575	8.07353	3.0132
ENSMUSG00000028073	Pear1	platelet endothelial aggregation receptor 1 [Source:MGI Symbol;Acc:MGI:1920432]	25.1715	9.32918	16.1187	2.20895	0.463684	4.76392	1.89868e-06	7.25274e-05				0.001	0.004	0	0.071	0.056	0.054	0		0.00166667	0.04525	27.15	4.76288
ENSMUSG00000032243	Itga11	integrin alpha 11 [Source:MGI Symbol;Acc:MGI:2442114]	27.6759	20.3886	23.5118	1.972	0.427645	4.6113	4.00159e-06	0.000137121				0.005	0.003	0.007	0.051	0.034	0.048	0.047		0.005	0.045	9	3.16993
ENSMUSG00000041836	Ptpre	protein tyrosine phosphatase, receptor type, E [Source:MGI Symbol;Acc:MGI:97813]	45.0129	27.7676	35.1585	1.45633	0.3958	3.67945	0.000233735	0.0035979				0.006	0.008	0.014	0.054	0.019	0.055	0.052		0.00933333	0.045	4.82143	2.26946
ENSMUSG00000046991	Wdr27	WD repeat domain 27 [Source:MGI Symbol;Acc:MGI:1918932]	25.8693	23.9709	24.7845	1.59025	0.430915	3.69041	0.000223895	0.00349067				0.007	0.004	0.013	0.054	0.054	0.038	0.034		0.008	0.045	5.625	2.49185
ENSMUSG00000021947	Cryl1	crystallin, lambda 1 [Source:MGI Symbol;Acc:MGI:1915881]	34.2492	25.9774	29.5224	1.49147	0.398788	3.74002	0.000184008	0.00299309				0.011	0.007	0.01	0.063	0.04	0.038	0.038		0.00933333	0.04475	4.79464	2.26142
ENSMUSG00000032724	Abtb2	ankyrin repeat and BTB (POZ) domain containing 2 [Source:MGI Symbol;Acc:MGI:2139365]	33.4472	34.4623	34.0273	2.05608	0.40365	5.09372	3.51102e-07	1.69557e-05				0.006	0.007	0.003	0.06	0.036	0.018	0.065		0.00533333	0.04475	8.39062	3.06878
ENSMUSG00000057606	Colq	collagen-like tail subunit (single strand of homotrimer) of asymmetric acetylcholinesterase [Source:MGI Symbol;Acc:MGI:1338761]	20.825	9.34629	14.2657	1.93144	0.462001	4.1806	2.90746e-05	0.000693956				0.005	0.001	0.003	0.064	0.022	0.055	0.036		0.003	0.04425	14.75	3.88264
ENSMUSG00000056752	Dnah9	dynein, axonemal, heavy chain 9 [Source:MGI Symbol;Acc:MGI:1289279]	102.854	61.3724	79.1502	1.6992	0.308686	5.50461	3.6999e-08	2.47204e-06				0.008	0.009	0.01	0.056	0.03	0.052	0.039		0.009	0.04425	4.91667	2.29768
ENSMUSG00000079560	Hoxa3	homeobox A3 [Source:MGI Symbol;Acc:MGI:96175]	11.7484	7.24341	9.17413	1.57034	0.471426	3.33104	0.000865216	0.00921628				0.004	0	0.004	0.061	0.026	0.044	0.046		0.00266667	0.04425	16.5938	4.05257
ENSMUSG00000000766	Oprm1	opioid receptor, mu 1 [Source:MGI Symbol;Acc:MGI:97441]	85.419	45.9729	62.8783	1.83849	0.335708	5.47647	4.33904e-08	2.80847e-06				0.009	0.006	0.009	0.066	0.033	0.048	0.027		0.008	0.0435	5.4375	2.44294
ENSMUSG00000051497	Kcnj16	potassium inwardly-rectifying channel, subfamily J, member 16 [Source:MGI Symbol;Acc:MGI:1314842]	14.1343	11.2368	12.4786	1.73224	0.466833	3.71061	0.000206758	0.00326626				0.003	0.001	0.006	0.055	0.036	0.037	0.045		0.00333333	0.04325	12.975	3.69766
ENSMUSG00000030739	Myh14	myosin, heavy polypeptide 14 [Source:MGI Symbol;Acc:MGI:1919210]	17.3679	11.0111	13.7354	1.68594	0.465347	3.62298	0.000291232	0.00425793				0.001	0.006	0.004	0.062	0.054	0.036	0.021		0.00366667	0.04325	11.7955	3.56016
ENSMUSG00000040624	Plekhg1	pleckstrin homology domain containing, family G (with RhoGef domain) member 1 [Source:MGI Symbol;Acc:MGI:2676551]	52.4157	52.3833	52.3972	1.65251	0.359656	4.59469	4.33385e-06	0.000146354				0.011	0.003	0.014	0.05	0.035	0.037	0.051		0.00933333	0.04325	4.63393	2.21224
ENSMUSG00000026090	2010300C02Rik	RIKEN cDNA 2010300C02 gene [Source:MGI Symbol;Acc:MGI:1919347]	34.3272	15.7456	23.7092	1.56371	0.43104	3.62777	0.000285885	0.0041929				0.006	0.009	0.006	0.068	0.023	0.046	0.035		0.007	0.043	6.14286	2.61891
ENSMUSG00000022754	Tmem45a	transmembrane protein 45a [Source:MGI Symbol;Acc:MGI:1913122]	21.6002	14.8055	17.7175	1.52358	0.445723	3.41822	0.000630311	0.00732815				0.007	0.007	0.005	0.03	0.034	0.066	0.042		0.00633333	0.043	6.78947	2.7633
ENSMUSG00000001870	Ltbp1	latent transforming growth factor beta binding protein 1 [Source:MGI Symbol;Acc:MGI:109151]	84.6569	114.271	101.579	0.980903	0.26885	3.64851	0.000263762	0.00392401				0.015	0.014	0.022	0.041	0.039	0.026	0.064		0.017	0.0425	2.5	1.32193
ENSMUSG00000066113	Adamtsl1	ADAMTS-like 1 [Source:MGI Symbol;Acc:MGI:1924989]	106.227	80.3428	91.4362	1.19117	0.283515	4.20145	2.65215e-05	0.000647105				0.013	0.011	0.016	0.049	0.033	0.048	0.039		0.0133333	0.04225	3.16875	1.66391
ENSMUSG00000052273	Dnah3	dynein, axonemal, heavy chain 3 [Source:MGI Symbol;Acc:MGI:2683040]	44.2578	35.384	39.1871	1.43931	0.367837	3.91289	9.11986e-05	0.00171251				0.011	0.007	0.012	0.049	0.029	0.043	0.047		0.01	0.042	4.2	2.07039
ENSMUSG00000068587	Mgam	maltase-glucoamylase [Source:MGI Symbol;Acc:MGI:1203495]	43.3792	22.16	31.2539	1.36066	0.399374	3.40697	0.000656891	0.00755404				0.007	0.011	0.01	0.048	0.033	0.059	0.026		0.00933333	0.0415	4.44643	2.15265
ENSMUSG00000049134	Nrap	nebulin-related anchoring protein [Source:MGI Symbol;Acc:MGI:1098765]	14.7158	13.1578	13.8255	1.59772	0.460734	3.46778	0.000524783	0.00640634				0.005	0.002	0.007	0.036	0.034	0.044	0.045		0.00466667	0.03975	8.51786	3.09049
ENSMUSG00000020902	Ntn1	netrin 1 [Source:MGI Symbol;Acc:MGI:105088]	54.7677	25.0242	37.7714	1.82949	0.402825	4.54164	5.5818e-06	0.000179707				0.004	0.009	0.004	0.054	0.024	0.047	0.032		0.00566667	0.03925	6.92647	2.79212
ENSMUSG00000002944	Cd36	CD36 antigen [Source:MGI Symbol;Acc:MGI:107899]	25.6176	16.3379	20.315	1.87835	0.446858	4.20345	2.62874e-05	0.000643921				0.007	0.004	0.001	0.055	0.024	0.035	0.042		0.004	0.039	9.75	3.2854
ENSMUSG00000059854	Hydin	HYDIN, axonemal central pair apparatus protein [Source:MGI Symbol;Acc:MGI:2389007]	85.2823	61.3397	71.6008	1.64264	0.314176	5.22841	1.70972e-07	9.14121e-06				0.007	0.009	0.01	0.044	0.035	0.043	0.034		0.00866667	0.039	4.5	2.16993
ENSMUSG00000022836	Mylk	myosin, light polypeptide kinase [Source:MGI Symbol;Acc:MGI:894806]	71.8048	34.7934	50.6554	1.99386	0.364293	5.47324	4.41888e-08	2.83066e-06				0.005	0.006	0.006	0.055	0.034	0.047	0.02		0.00566667	0.039	6.88235	2.7829
ENSMUSG00000043760	Pkhd1	polycystic kidney and hepatic disease 1 [Source:MGI Symbol;Acc:MGI:2155808]	125.812	114.751	119.491	1.50001	0.26847	5.58725	2.30697e-08	1.6228e-06				0.012	0.008	0.009	0.035	0.035	0.043	0.041		0.00966667	0.0385	3.98276	1.99377
ENSMUSG00000043051	Disc1	disrupted in schizophrenia 1 [Source:MGI Symbol;Acc:MGI:2447658]	48.157	30.3678	37.9918	2.40722	0.410579	5.863	4.5459e-09	3.86941e-07				0.003	0.004	0.001	0.04	0.025	0.046	0.042		0.00266667	0.03825	14.3438	3.84235
ENSMUSG00000039809	Gabbr2	gamma-aminobutyric acid (GABA) B receptor, 2 [Source:MGI Symbol;Acc:MGI:2386030]	81.287	57.9622	67.9586	1.59158	0.316512	5.0285	4.94323e-07	2.29793e-05				0.013	0.006	0.007	0.05	0.028	0.04	0.034		0.00866667	0.038	4.38462	2.13245
ENSMUSG00000055737	Ghr	growth hormone receptor [Source:MGI Symbol;Acc:MGI:95708]	71.4652	44.3954	55.9968	1.11888	0.333335	3.35662	0.000789007	0.00862632				0.016	0.011	0.008	0.047	0.025	0.044	0.03		0.0116667	0.0365	3.12857	1.6455
ENSMUSG00000050296	Abca12	ATP-binding cassette, sub-family A (ABC1), member 12 [Source:MGI Symbol;Acc:MGI:2676312]	35.9281	31.9622	33.6619	1.49628	0.386421	3.87214	0.000107883	0.00195506				0.005	0.006	0.012	0.026	0.03	0.048	0.042		0.00766667	0.0365	4.76087	2.25123
ENSMUSG00000041482	Piezo2	piezo-type mechanosensitive ion channel component 2 [Source:MGI Symbol;Acc:MGI:1918781]	89.199	58.6753	71.7569	1.8112	0.310681	5.82978	5.5499e-09	4.57768e-07				0.007	0.006	0.007	0.043	0.031	0.042	0.029		0.00666667	0.03625	5.4375	2.44294
ENSMUSG00000026483	Fam129a	family with sequence similarity 129, member A [Source:MGI Symbol;Acc:MGI:2137237]	31.0821	25.4702	27.8753	1.5929	0.426189	3.73754	0.000185827	0.00301743				0.007	0.001	0.011	0.038	0.021	0.043	0.042		0.00633333	0.036	5.68421	2.50696
ENSMUSG00000046532	Ar	androgen receptor [Source:MGI Symbol;Acc:MGI:88064]	37.7622	27.5219	31.9106	1.6818	0.415586	4.04683	5.19164e-05	0.0010985				0.004	0.011	0.002	0.016	0.037	0.056	0.034		0.00566667	0.03575	6.30882	2.65737
ENSMUSG00000028176	Lrrc7	leucine rich repeat containing 7 [Source:MGI Symbol;Acc:MGI:2676665]	105.964	95.8239	100.169	1.12773	0.277511	4.06373	4.82945e-05	0.00104076				0.013	0.01	0.012	0.031	0.027	0.043	0.042		0.0116667	0.03575	3.06429	1.61555
ENSMUSG00000030020	Prickle2	prickle homolog 2 (Drosophila) [Source:MGI Symbol;Acc:MGI:1925144]	82.885	57.2765	68.2515	1.16225	0.320902	3.62182	0.000292541	0.00426788				0.016	0.01	0.007	0.05	0.022	0.035	0.035		0.011	0.0355	3.22727	1.69032
ENSMUSG00000023805	Synj2	synaptojanin 2 [Source:MGI Symbol;Acc:MGI:1201671]	22.4144	16.0352	18.7692	1.45613	0.440384	3.3065	0.000944696	0.00975358				0.008	0.006	0.004	0.036	0.03	0.042	0.033		0.006	0.03525	5.875	2.55459
ENSMUSG00000015305	Sash1	SAM and SH3 domain containing 1 [Source:MGI Symbol;Acc:MGI:1917347]	39.7827	24.6191	31.1178	1.33423	0.401045	3.32687	0.000878273	0.00931769				0.005	0.011	0.008	0.041	0.027	0.04	0.032		0.008	0.035	4.375	2.12928
ENSMUSG00000022510	Trp63	transformation related protein 63 [Source:MGI Symbol;Acc:MGI:1330810]	50.9318	30.0661	39.0085	1.42009	0.371115	3.82655	0.000129953	0.00227114				0.009	0.006	0.009	0.048	0.019	0.041	0.031		0.008	0.03475	4.34375	2.11894
ENSMUSG00000014329	Bicc1	BicC family RNA binding protein 1 [Source:MGI Symbol;Acc:MGI:1933388]	53.1939	33.9791	42.214	1.75112	0.374936	4.67045	3.00545e-06	0.000107947				0.005	0.003	0.01	0.041	0.02	0.044	0.033		0.006	0.0345	5.75	2.52356
ENSMUSG00000043913	Ccdc60	coiled-coil domain containing 60 [Source:MGI Symbol;Acc:MGI:2141043]	34.2522	20.591	26.4458	2.4578	0.431811	5.69185	1.25668e-08	9.64021e-07				0.002	0.003	0.001	0.048	0.023	0.03	0.036		0.002	0.03425	17.125	4.09803
ENSMUSG00000018581	Dnah11	dynein, axonemal, heavy chain 11 [Source:MGI Symbol;Acc:MGI:1100864]	57.6668	58.0787	57.9022	1.65949	0.383146	4.33121	1.48291e-05	0.000403547				0.009	0.001	0.011	0.04	0.028	0.03	0.038		0.007	0.034	4.85714	2.28011
ENSMUSG00000025892	Gria4	glutamate receptor, ionotropic, AMPA4 (alpha 4) [Source:MGI Symbol;Acc:MGI:95811]	76.8562	68.697	72.1938	1.34514	0.324116	4.15017	3.32234e-05	0.000770295				0.009	0.007	0.013	0.052	0.035	0.019	0.028		0.00966667	0.0335	3.46552	1.79307
ENSMUSG00000037106	Fer1l6	fer-1-like 6 (C. elegans) [Source:MGI Symbol;Acc:MGI:3645398]	33.6978	19.2265	25.4285	1.968	0.42263	4.65654	3.21566e-06	0.000113529				0.006	0.003	0.002	0.053	0.023	0.028	0.029		0.00366667	0.03325	9.06818	3.18081
ENSMUSG00000016128	Stard13	StAR-related lipid transfer (START) domain containing 13 [Source:MGI Symbol;Acc:MGI:2385331]	46.4128	23.7828	33.4814	1.69976	0.406227	4.18426	2.86091e-05	0.000684039				0.004	0.007	0.005	0.048	0.021	0.035	0.029		0.00533333	0.03325	6.23438	2.64024
ENSMUSG00000044017	Adgrd1	adhesion G protein-coupled receptor D1 [Source:MGI Symbol;Acc:MGI:3041203]	23.3607	14.1878	18.1191	1.58831	0.449117	3.53653	0.000405422	0.0054096				0.003	0.003	0.008	0.045	0.026	0.037	0.025		0.00466667	0.03325	7.125	2.83289
ENSMUSG00000089809	A930011G23Rik	RIKEN cDNA A930011G23 gene [Source:MGI Symbol;Acc:MGI:2442790]	75.7244	73.2005	74.2822	1.8653	0.340678	5.47525	4.36889e-08	2.8096e-06				0.007	0.001	0.01	0.036	0.024	0.032	0.04		0.006	0.033	5.5	2.45943
ENSMUSG00000021879	Dnah12	dynein, axonemal, heavy chain 12 [Source:MGI Symbol;Acc:MGI:107720]	41.7284	29.9523	34.9992	1.49314	0.380913	3.91989	8.85906e-05	0.00167657				0.008	0.005	0.008	0.036	0.024	0.04	0.032		0.007	0.033	4.71429	2.23704
ENSMUSG00000028434	Epb41l4b	erythrocyte membrane protein band 4.1 like 4b [Source:MGI Symbol;Acc:MGI:1859149]	30.3697	23.5537	26.4748	1.39545	0.407283	3.42623	0.000612013	0.0071797				0.01	0.006	0.006	0.05	0.024	0.023	0.034		0.00733333	0.03275	4.46591	2.15895
ENSMUSG00000021061	Sptb	spectrin beta, erythrocytic [Source:MGI Symbol;Acc:MGI:98387]	31.9736	15.0828	22.3217	1.42685	0.429088	3.32532	0.000883173	0.00934879				0.008	0.004	0.006	0.037	0.026	0.054	0.014		0.006	0.03275	5.45833	2.44846
ENSMUSG00000034324	Tmem132c	transmembrane protein 132C [Source:MGI Symbol;Acc:MGI:2443061]	74.0877	36.9956	52.8922	2.12713	0.350037	6.07689	1.22537e-09	1.16541e-07				0.005	0.004	0.003	0.044	0.021	0.041	0.025		0.004	0.03275	8.1875	3.03342
ENSMUSG00000019866	Aim1	absent in melanoma 1 [Source:MGI Symbol;Acc:MGI:109544]	37.9341	29.2621	32.9787	1.69933	0.390482	4.35187	1.34984e-05	0.000374441				0.007	0.004	0.006	0.038	0.019	0.033	0.04		0.00566667	0.0325	5.73529	2.51987
ENSMUSG00000026077	Npas2	neuronal PAS domain protein 2 [Source:MGI Symbol;Acc:MGI:109232]	31.6208	26.0582	28.4422	1.60787	0.406039	3.95989	7.49833e-05	0.00146516				0.008	0.002	0.008	0.04	0.02	0.031	0.039		0.006	0.0325	5.41667	2.43741
ENSMUSG00000051435	Fhad1	forkhead-associated (FHA) phosphopeptide binding domain 1 [Source:MGI Symbol;Acc:MGI:1920323]	27.7247	13.593	19.6494	1.79354	0.441464	4.0627	4.85083e-05	0.00104233				0.004	0.002	0.005	0.057	0.018	0.028	0.025		0.00366667	0.032	8.72727	3.12553
ENSMUSG00000055567	Unc80	unc-80 homolog (C. elegans) [Source:MGI Symbol;Acc:MGI:2652882]	44.6695	37.1109	40.3503	1.34152	0.376462	3.56348	0.000365964	0.00507207				0.009	0.003	0.012	0.04	0.022	0.032	0.032		0.008	0.0315	3.9375	1.97728
ENSMUSG00000035615	Frmpd1	FERM and PDZ domain containing 1 [Source:MGI Symbol;Acc:MGI:2446274]	17.7445	13.2445	15.1731	1.76589	0.45921	3.84549	0.000120311	0.00213591				0.001	0.003	0.005	0.025	0.021	0.04	0.038		0.003	0.031	10.3333	3.36923
ENSMUSG00000026726	Cubn	cubilin (intrinsic factor-cobalamin receptor) [Source:MGI Symbol;Acc:MGI:1931256]	43.0899	32.2848	36.9156	1.33729	0.381996	3.5008	0.00046386	0.00588218				0.006	0.006	0.012	0.033	0.026	0.037	0.027		0.008	0.03075	3.84375	1.94251
ENSMUSG00000030607	Acan	aggrecan [Source:MGI Symbol;Acc:MGI:99602]	12.2623	5.64238	8.47947	1.61146	0.469908	3.42932	0.000605097	0.00712546				0.001	0.001	0	0.041	0.005	0.036	0.04		0.000666667	0.0305	45.75	5.5157
ENSMUSG00000048939	Atp13a5	ATPase type 13A5 [Source:MGI Symbol;Acc:MGI:2444068]	27.6499	18.8843	22.641	1.61113	0.429014	3.75542	0.000173051	0.00286487				0.008	0.004	0.003	0.045	0.019	0.024	0.032		0.005	0.03	6	2.58496
ENSMUSG00000022262	Dnah5	dynein, axonemal, heavy chain 5 [Source:MGI Symbol;Acc:MGI:107718]	49.3635	40.0354	44.0332	1.45224	0.355591	4.08403	4.4262e-05	0.000972982				0.008	0.006	0.007	0.037	0.026	0.028	0.029		0.007	0.03	4.28571	2.09954
ENSMUSG00000028492	Saxo1	stablizer of axonemal microtubules 1 [Source:MGI Symbol;Acc:MGI:1923061]	23.4626	10.5234	16.0688	1.78571	0.460679	3.87626	0.000106076	0.00192725				0.004	0.001	0.003	0.042	0.031	0.038	0.006		0.00266667	0.02925	10.9688	3.45533
ENSMUSG00000042942	Greb1l	growth regulation by estrogen in breast cancer-like [Source:MGI Symbol;Acc:MGI:3576497]	48.2104	28.6617	37.0397	1.45609	0.386721	3.76521	0.000166407	0.00277707				0.003	0.007	0.009	0.023	0.023	0.048	0.023		0.00633333	0.02925	4.61842	2.2074
ENSMUSG00000042453	Reln	reelin [Source:MGI Symbol;Acc:MGI:103022]	98.1551	65.975	79.7665	1.04955	0.3152	3.32978	0.000869139	0.0092475				0.009	0.007	0.014	0.041	0.021	0.033	0.022		0.01	0.02925	2.925	1.54844
ENSMUSG00000022197	Pdzd2	PDZ domain containing 2 [Source:MGI Symbol;Acc:MGI:1922394]	74.1613	45.4177	57.7364	1.61093	0.333185	4.83492	1.33196e-06	5.43307e-05				0.008	0.004	0.006	0.045	0.021	0.027	0.021		0.006	0.0285	4.75	2.24793
ENSMUSG00000078598	Skint5	selection and upkeep of intraepithelial T cells 5 [Source:MGI Symbol;Acc:MGI:3650151]	85.8309	79.308	82.1035	1.43521	0.297271	4.82797	1.37934e-06	5.55948e-05				0.008	0.003	0.012	0.035	0.015	0.026	0.038		0.00766667	0.0285	3.71739	1.89429
ENSMUSG00000028369	Svep1	sushi, von Willebrand factor type A, EGF and pentraxin domain containing 1 [Source:MGI Symbol;Acc:MGI:1928849]	31.3111	19.8194	24.7444	1.40843	0.415316	3.39122	0.000695819	0.00786107				0.006	0.005	0.007	0.036	0.017	0.033	0.027		0.006	0.02825	4.70833	2.23522
ENSMUSG00000030450	Oca2	oculocutaneous albinism II [Source:MGI Symbol;Acc:MGI:97454]	41.5835	39.2213	40.2337	2.39157	0.380884	6.27899	3.40774e-10	3.69324e-08				0.002	0.002	0.004	0.034	0.021	0.019	0.037		0.00266667	0.02775	10.4063	3.37938
ENSMUSG00000026141	Col19a1	collagen, type XIX, alpha 1 [Source:MGI Symbol;Acc:MGI:1095415]	60.8446	35.2037	46.1926	1.6774	0.357387	4.69351	2.68556e-06	9.76733e-05				0.008	0.003	0.004	0.034	0.016	0.036	0.023		0.005	0.02725	5.45	2.44626
ENSMUSG00000043301	Kcnj6	potassium inwardly-rectifying channel, subfamily J, member 6 [Source:MGI Symbol;Acc:MGI:104781]	42.509	30.1879	35.4684	1.59058	0.418064	3.80463	0.000142015	0.00243766				0.004	0.001	0.011	0.043	0.016	0.024	0.026		0.00533333	0.02725	5.10937	2.35315
ENSMUSG00000032232	Cgnl1	cingulin-like 1 [Source:MGI Symbol;Acc:MGI:1915428]	20.6818	20.0033	20.2941	1.50966	0.436327	3.45992	0.000540332	0.00654391				0.005	0.005	0.003	0.019	0.029	0.031	0.028		0.00433333	0.02675	6.17308	2.62599
ENSMUSG00000061462	Obscn	obscurin, cytoskeletal calmodulin and titin-interacting RhoGEF [Source:MGI Symbol;Acc:MGI:2681862]	28.9468	12.1571	19.3527	1.50294	0.438233	3.42953	0.000604622	0.00712546				0.007	0.004	0.003	0.052	0.018	0.024	0.013		0.00466667	0.02675	5.73214	2.51907
ENSMUSG00000073514	Dok6	docking protein 6 [Source:MGI Symbol;Acc:MGI:3639495]	77.5985	66.302	71.1433	1.28517	0.315526	4.07309	4.63938e-05	0.00101024				0.005	0.007	0.011	0.029	0.022	0.026	0.029		0.00766667	0.0265	3.45652	1.78932
ENSMUSG00000052085	Dock8	dedicator of cytokinesis 8 [Source:MGI Symbol;Acc:MGI:1921396]	27.1621	26.1322	26.5736	1.89862	0.430818	4.40702	1.04803e-05	0.000301753				0.002	0.001	0.007	0.027	0.024	0.024	0.029		0.00333333	0.026	7.8	2.96347
ENSMUSG00000029287	Tgfbr3	transforming growth factor, beta receptor III [Source:MGI Symbol;Acc:MGI:104637]	34.2294	15.2186	23.3661	1.74117	0.441772	3.94133	8.10308e-05	0.00156417				0.003	0.001	0.006	0.028	0.017	0.045	0.014		0.00333333	0.026	7.8	2.96347
ENSMUSG00000030994	D7Ertd443e	DNA segment, Chr 7, ERATO Doi 443, expressed [Source:MGI Symbol;Acc:MGI:1196431]	14.982	16.2371	15.6992	1.53148	0.455401	3.36293	0.000771186	0.00848623				0.001	0.003	0.007	0.029	0.021	0.017	0.036		0.00366667	0.02575	7.02273	2.81203
ENSMUSG00000039087	Rreb1	ras responsive element binding protein 1 [Source:MGI Symbol;Acc:MGI:2443664]	34.5176	13.8359	22.6995	1.55463	0.432202	3.59698	0.000321929	0.00458447				0.003	0.005	0.003	0.041	0.019	0.031	0.012		0.00366667	0.02575	7.02273	2.81203
ENSMUSG00000030518	Fam189a1	family with sequence similarity 189, member A1 [Source:MGI Symbol;Acc:MGI:1917888]	70.1532	38.2752	51.9372	1.97922	0.350521	5.64651	1.63742e-08	1.21606e-06				0.006	0.003	0.002	0.032	0.019	0.033	0.018		0.00366667	0.0255	6.95455	2.79796
ENSMUSG00000030513	Pcsk6	proprotein convertase subtilisin/kexin type 6 [Source:MGI Symbol;Acc:MGI:102897]	29.3442	19.2957	23.6022	1.73822	0.425477	4.08535	4.40113e-05	0.000968613				0.003	0.003	0.005	0.033	0.019	0.025	0.023		0.00366667	0.025	6.81818	2.76939
ENSMUSG00000021708	Rasgrf2	RAS protein-specific guanine nucleotide-releasing factor 2 [Source:MGI Symbol;Acc:MGI:109137]	36.818	28.6615	32.1571	1.77969	0.397586	4.47624	7.59707e-06	0.000230647				0.007	0.002	0.004	0.032	0.017	0.023	0.027		0.00433333	0.02475	5.71154	2.51388
ENSMUSG00000030287	Itpr2	inositol 1,4,5-triphosphate receptor 2 [Source:MGI Symbol;Acc:MGI:99418]	51.4059	45.8442	48.2278	2.26111	0.357942	6.31697	2.66743e-10	2.99539e-08				0.003	0.003	0.003	0.03	0.027	0.018	0.023		0.003	0.0245	8.16667	3.02975
ENSMUSG00000032849	Abcc4	ATP-binding cassette, sub-family C (CFTR/MRP), member 4 [Source:MGI Symbol;Acc:MGI:2443111]	31.4576	27.2161	29.0339	1.4122	0.408121	3.46024	0.000539689	0.00654391				0.008	0.002	0.006	0.03	0.023	0.023	0.021		0.00533333	0.02425	4.54688	2.18488
ENSMUSG00000022376	Adcy8	adenylate cyclase 8 [Source:MGI Symbol;Acc:MGI:1341110]	37.2604	21.6481	28.3391	1.51371	0.407809	3.71182	0.000205772	0.0032581				0.004	0.006	0.004	0.03	0.016	0.029	0.022		0.00466667	0.02425	5.19643	2.37752
ENSMUSG00000032878	Ccdc85a	coiled-coil domain containing 85A [Source:MGI Symbol;Acc:MGI:2445069]	38.2171	12.4688	23.5038	1.69898	0.437118	3.88677	0.000101586	0.00186385				0.002	0.005	0.002	0.039	0.019	0.03	0.007		0.003	0.02375	7.91667	2.98489
ENSMUSG00000036264	Fstl4	follistatin-like 4 [Source:MGI Symbol;Acc:MGI:2443199]	65.4143	46.5105	54.6122	1.53572	0.352613	4.35525	1.32913e-05	0.000369797				0.004	0.008	0.003	0.025	0.021	0.025	0.024		0.005	0.02375	4.75	2.24793
ENSMUSG00000002020	Ltbp2	latent transforming growth factor beta binding protein 2 [Source:MGI Symbol;Acc:MGI:99502]	10.8364	10.3805	10.5759	1.6375	0.471185	3.47528	0.000510318	0.00627496				0.003	0.002	0	0.024	0.02	0.02	0.031		0.00166667	0.02375	14.25	3.83289
ENSMUSG00000004668	Abca13	ATP-binding cassette, sub-family A (ABC1), member 13 [Source:MGI Symbol;Acc:MGI:2388707]	65.1415	56.3219	60.1017	1.74867	0.331532	5.27452	1.33103e-07	7.36251e-06				0.003	0.005	0.005	0.024	0.022	0.022	0.024		0.00433333	0.023	5.30769	2.40808
ENSMUSG00000003279	Dlgap1	discs, large (Drosophila) homolog-associated protein 1 [Source:MGI Symbol;Acc:MGI:1346065]	126.726	96.9087	109.687	1.31518	0.274095	4.79827	1.60045e-06	6.28029e-05				0.007	0.004	0.008	0.028	0.018	0.025	0.019		0.00633333	0.0225	3.55263	1.82889
ENSMUSG00000031523	Dlc1	deleted in liver cancer 1 [Source:MGI Symbol;Acc:MGI:1354949]	56.7011	38.1085	46.0768	1.53112	0.359275	4.26169	2.02883e-05	0.00052364				0.004	0.004	0.006	0.029	0.019	0.023	0.018		0.00466667	0.02225	4.76786	2.25334
ENSMUSG00000056158	Car10	carbonic anhydrase 10 [Source:MGI Symbol;Acc:MGI:1919855]	59.7611	58.1138	58.8198	1.5567	0.329366	4.72634	2.286e-06	8.52267e-05				0.005	0.004	0.006	0.023	0.015	0.018	0.03		0.005	0.0215	4.3	2.10434
ENSMUSG00000051506	Wdfy4	WD repeat and FYVE domain containing 4 [Source:MGI Symbol;Acc:MGI:3584510]	25.7987	23.0292	24.2161	1.57758	0.417215	3.78121	0.000156071	0.00263286				0.004	0.003	0.004	0.027	0.02	0.014	0.021		0.00366667	0.0205	5.59091	2.48308
ENSMUSG00000039058	Ak5	adenylate kinase 5 [Source:MGI Symbol;Acc:MGI:2677491]	22.3134	22.589	22.4709	1.45023	0.423634	3.42331	0.000618645	0.00722567				0.005	0.002	0.005	0.027	0.015	0.013	0.027		0.004	0.0205	5.125	2.35755
ENSMUSG00000034751	Mast4	microtubule associated serine/threonine kinase family member 4 [Source:MGI Symbol;Acc:MGI:1918885]	76.2452	59.9894	66.9562	1.48633	0.318181	4.67134	2.99239e-06	0.000107686				0.006	0.004	0.005	0.021	0.019	0.024	0.017		0.005	0.02025	4.05	2.01792
ENSMUSG00000037143	Cfap61	cilia and flagella associated protein 61 [Source:MGI Symbol;Acc:MGI:1926024]	37.1385	24.0244	29.6447	1.57099	0.398601	3.94125	8.10572e-05	0.00156417				0.006	0.003	0.003	0.029	0.016	0.019	0.016		0.004	0.02	5	2.32193
ENSMUSG00000005107	Slc2a9	solute carrier family 2 (facilitated glucose transporter), member 9 [Source:MGI Symbol;Acc:MGI:2152844]	20.7804	10.6125	14.9701	1.60558	0.458317	3.5032	0.000459708	0.00584943				0.002	0.001	0.004	0.023	0.012	0.029	0.015		0.00233333	0.01975	8.46429	3.08139
ENSMUSG00000020143	Dock2	dedicator of cyto-kinesis 2 [Source:MGI Symbol;Acc:MGI:2149010]	64.5242	57.4114	60.4597	1.37118	0.327475	4.18714	2.82495e-05	0.000676863				0.004	0.006	0.006	0.015	0.015	0.023	0.025		0.00533333	0.0195	3.65625	1.87036
ENSMUSG00000062980	Cped1	cadherin-like and PC-esterase domain containing 1 [Source:MGI Symbol;Acc:MGI:2444814]	30.0161	27.5188	28.5891	1.37662	0.400466	3.43755	0.000587	0.00698294				0.006	0.004	0.004	0.028	0.017	0.011	0.022		0.00466667	0.0195	4.17857	2.06301
ENSMUSG00000029093	Sorcs2	sortilin-related VPS10 domain containing receptor 2 [Source:MGI Symbol;Acc:MGI:1932289]	41.48	36.6194	38.7025	1.53345	0.370415	4.13982	3.47585e-05	0.000798931				0.003	0.004	0.005	0.017	0.015	0.021	0.023		0.004	0.019	4.75	2.24793
ENSMUSG00000024421	Lama3	laminin, alpha 3 [Source:MGI Symbol;Acc:MGI:99909]	24.0649	24.8939	24.5386	1.47847	0.419433	3.52494	0.00042358	0.00556054				0.003	0.002	0.007	0.017	0.012	0.019	0.026		0.004	0.0185	4.625	2.20945
ENSMUSG00000020481	Ankrd36	ankyrin repeat domain 36 [Source:MGI Symbol;Acc:MGI:1923639]	12.8947	7.68584	9.9182	1.85814	0.471419	3.94159	8.09431e-05	0.00156417				0	0.001	0.001	0.015	0.01	0.027	0.021		0.000666667	0.01825	27.375	4.77479
ENSMUSG00000053702	Nebl	nebulette [Source:MGI Symbol;Acc:MGI:1921353]	40.0229	36.9524	38.2683	1.3888	0.378369	3.67049	0.000242081	0.00369888				0.004	0.003	0.006	0.015	0.02	0.022	0.016		0.00433333	0.01825	4.21154	2.07435
ENSMUSG00000022311	Csmd3	CUB and Sushi multiple domains 3 [Source:MGI Symbol;Acc:MGI:2386403]	135.342	109.262	120.439	1.45036	0.258501	5.61065	2.01574e-08	1.4452e-06				0.005	0.004	0.005	0.022	0.013	0.017	0.02		0.00466667	0.018	3.85714	1.94753
ENSMUSG00000032238	Rora	RAR-related orphan receptor alpha [Source:MGI Symbol;Acc:MGI:104661]	81.6461	58.4126	68.3698	1.72389	0.319308	5.39881	6.70844e-08	4.06013e-06				0.003	0.003	0.005	0.019	0.012	0.021	0.018		0.00366667	0.0175	4.77273	2.25481
ENSMUSG00000063873	Slc24a3	solute carrier family 24 (sodium/potassium/calcium exchanger), member 3 [Source:MGI Symbol;Acc:MGI:2137513]	55.0019	34.5163	43.2959	1.64759	0.373946	4.40596	1.05318e-05	0.000302474				0.002	0.004	0.003	0.019	0.011	0.021	0.018		0.003	0.01725	5.75	2.52356
ENSMUSG00000057914	Cacnb2	calcium channel, voltage-dependent, beta 2 subunit [Source:MGI Symbol;Acc:MGI:894644]	36.1308	34.9881	35.4778	1.44836	0.378433	3.82726	0.00012958	0.00227021				0.004	0.003	0.005	0.018	0.016	0.015	0.019		0.004	0.017	4.25	2.08746
ENSMUSG00000026609	Ush2a	Usher syndrome 2A (autosomal recessive, mild) [Source:MGI Symbol;Acc:MGI:1341292]	75.2175	54.8266	63.5656	1.77434	0.32494	5.46052	4.7474e-08	3.01008e-06				0.003	0.003	0.004	0.018	0.013	0.02	0.017		0.00333333	0.017	5.1	2.3505
ENSMUSG00000039057	Myo16	myosin XVI [Source:MGI Symbol;Acc:MGI:2685951]	49.7305	37.2137	42.5781	1.54714	0.36399	4.2505	2.13297e-05	0.000547667				0.005	0.002	0.003	0.021	0.013	0.017	0.015		0.00333333	0.0165	4.95	2.30743
ENSMUSG00000066842	Hmcn1	hemicentin 1 [Source:MGI Symbol;Acc:MGI:2685047]	42.1499	33.9034	37.4377	1.28774	0.372204	3.45978	0.000540616	0.00654391				0.003	0.004	0.005	0.013	0.014	0.021	0.015		0.004	0.01575	3.9375	1.97728
ENSMUSG00000075270	Pde11a	phosphodiesterase 11A [Source:MGI Symbol;Acc:MGI:3036251]	23.1934	26.4675	25.0643	1.92675	0.423422	4.55043	5.35359e-06	0.000173559				0.002	0.001	0.002	0.011	0.008	0.014	0.026		0.00166667	0.01475	8.85	3.14568
ENSMUSG00000038115	Ano2	anoctamin 2 [Source:MGI Symbol;Acc:MGI:2387214]	26.4002	24.2037	25.145	1.57566	0.422958	3.72533	0.000195064	0.00312924				0.002	0.004	0.001	0.011	0.015	0.014	0.015		0.00233333	0.01375	5.89286	2.55897
ENSMUSG00000021313	Ryr2	ryanodine receptor 2, cardiac [Source:MGI Symbol;Acc:MGI:99685]	48.9913	36.3498	41.7675	1.19649	0.35969	3.32645	0.000879607	0.00931995				0.005	0.003	0.004	0.015	0.009	0.017	0.013		0.004	0.0135	3.375	1.75489
ENSMUSG00000062151	Unc13c	unc-13 homolog C (C. elegans) [Source:MGI Symbol;Acc:MGI:2149021]	41.1874	31.4352	35.6147	1.49495	0.380871	3.92509	8.66982e-05	0.00165081				0.003	0.002	0.004	0.016	0.008	0.015	0.015		0.003	0.0135	4.5	2.16993
ENSMUSG00000045083	Lingo2	leucine rich repeat and Ig domain containing 2 [Source:MGI Symbol;Acc:MGI:2442298]	103.216	94.729	98.3661	1.07972	0.272398	3.96376	7.3779e-05	0.00144466				0.005	0.004	0.005	0.013	0.011	0.014	0.015		0.00466667	0.01325	2.83929	1.50553
ENSMUSG00000035158	Mitf	microphthalmia-associated transcription factor [Source:MGI Symbol;Acc:MGI:104554]	15.9149	11.1974	13.2192	1.77007	0.464254	3.81271	0.00013745	0.00237263				0.001	0.001	0.001	0.02	0.017	0.008	0.006		0.001	0.01275	12.75	3.67243
ENSMUSG00000096054	Syne1	spectrin repeat containing, nuclear envelope 1 [Source:MGI Symbol;Acc:MGI:1927152]	49.9149	27.4367	37.0702	1.25464	0.375343	3.34264	0.000829869	0.00896974				0.004	0.004	0.002	0.018	0.009	0.015	0.009		0.00333333	0.01275	3.825	1.93546
ENSMUSG00000052942	Glis3	GLIS family zinc finger 3 [Source:MGI Symbol;Acc:MGI:2444289]	33.0563	17.3961	24.1076	1.96822	0.430128	4.57589	4.74193e-06	0.000157006				0.001	0.002	0.001	0.013	0.007	0.016	0.011		0.00133333	0.01175	8.8125	3.13955
ENSMUSG00000027684	Mecom	MDS1 and EVI1 complex locus [Source:MGI Symbol;Acc:MGI:95457]	42.6487	20.7541	30.1375	1.76146	0.42254	4.16873	3.06298e-05	0.000726425				0.001	0.002	0.002	0.016	0.009	0.01	0.005		0.00166667	0.01	6	2.58496
ENSMUSG00000039683	Sdk1	sidekick homolog 1 (chicken) [Source:MGI Symbol;Acc:MGI:2444413]	59.474	40.1726	48.4446	1.56561	0.349013	4.48582	7.26351e-06	0.00022233				0.002	0.002	0.002	0.011	0.006	0.011	0.009		0.002	0.00925	4.625	2.20945
ENSMUSG00000025909	Sntg1	syntrophin, gamma 1 [Source:MGI Symbol;Acc:MGI:1918346]	50.9291	44.0326	46.9883	1.17897	0.352683	3.34287	0.000829167	0.00896974				0.003	0.002	0.002	0.009	0.007	0.009	0.009		0.00233333	0.0085	3.64286	1.86507
ENSMUSG00000058897	Col25a1	collagen, type XXV, alpha 1 [Source:MGI Symbol;Acc:MGI:1924268]	21.054	18.8574	19.7988	1.59066	0.439195	3.62177	0.000292599	0.00426788				0.001	0.002	0.001	0.01	0.007	0.006	0.01		0.00133333	0.00825	6.1875	2.62936
ENSMUSG00000055471	Alk	anaplastic lymphoma kinase [Source:MGI Symbol;Acc:MGI:103305]	32.1506	30.463	31.1862	1.5329	0.397159	3.85967	0.000113541	0.00203316				0.001	0.001	0.003	0.006	0.007	0.01	0.009		0.00166667	0.008	4.8	2.26303
ENSMUSG00000066392	Nrxn3	neurexin III [Source:MGI Symbol;Acc:MGI:1096389]	91.9903	48.0678	66.8917	1.24085	0.318786	3.89244	9.92403e-05	0.00182897				0.002	0.003	0.001	0.008	0.006	0.01	0.004		0.002	0.007	3.5	1.80735
ENSMUSG00000052613	Pcdh15	protocadherin 15 [Source:MGI Symbol;Acc:MGI:1891428]	72.6706	52.9923	61.4259	1.15661	0.331667	3.48727	0.000487983	0.00611323				0.002	0.001	0.003	0.007	0.006	0.01	0.005		0.002	0.007	3.5	1.80735
ENSMUSG00000039335	Spata16	spermatogenesis associated 16 [Source:MGI Symbol;Acc:MGI:1918112]	14.386	7.59837	10.5074	1.63442	0.470905	3.47082	0.000518877	0.00635088				0	0	0.001	0.009	0.005	0.007	0.005		0.000333333	0.0065	19.5	4.2854
ENSMUSG00000060843	Ctnna3	catenin (cadherin associated protein), alpha 3 [Source:MGI Symbol;Acc:MGI:2661445]	49.7089	35.941	41.8415	1.47739	0.3709	3.98326	6.79764e-05	0.00135669				0.001	0.001	0.002	0.005	0.003	0.006	0.005		0.00133333	0.00475	3.5625	1.83289

## Sheet: Sox9_down_PC
Ensembl gene ID	Gene name	Description	Sox9 (Avg count)	Ctrl (Avg count)	baseMean	Fold change (Avg count, Sox9/Cntrl, log2)	lfcSE	stat	p-value	p-adjusted				ctrl_high_1	ctrl_high_2	ctrl_high_4	sox9_high_1	sox9_high_2	sox9_high_3	sox9_high_4		Cntrl (Avg FPKM)	Sox9 (Avg FPKM)	Fold change (Avg FPKM, Sox9/Cntrl)	Fold change (Avg FPKM, Sox9/Cntrl, log2)
ENSMUSG00000029580	Actb	actin, beta [Source:MGI Symbol;Acc:MGI:87904]	310610	344819	330158	-0.517134	0.129976	-3.97868	6.92982e-05	0.00137717	TRUE	FALSE		10442.8	11673.2	11694.4	8070.43	10498.9	10042.5	10267.5		11270.1	9719.85	0.862443	-0.2135
ENSMUSG00000001525	Tubb5	tubulin, beta 5 class I [Source:MGI Symbol;Acc:MGI:107812]	60642.1	65139.2	63211.9	-0.497224	0.130413	-3.81269	0.000137462	0.00237263	TRUE	FALSE		1784.14	1777.17	1767.66	1446.8	1699.19	1642.17	1448.55		1776.32	1559.18	0.877755	-0.18811
ENSMUSG00000025151	Maged1	melanoma antigen, family D, 1 [Source:MGI Symbol;Acc:MGI:1930187]	26373.6	26995.6	26729	-0.489633	0.126094	-3.88308	0.000103142	0.00188497	TRUE	FALSE		467.541	491.979	507.666	414.756	447.964	490.009	402.981		489.062	438.928	0.897488	-0.156035
ENSMUSG00000032399	Rpl4	ribosomal protein L4 [Source:MGI Symbol;Acc:MGI:1915141]	14364.7	15899	15241.4	-0.478037	0.125769	-3.80091	0.000144168	0.00246715	TRUE	FALSE		334.771	377.46	384.79	291.626	344.021	301.001	326.877		365.674	315.881	0.863834	-0.211174
ENSMUSG00000005610	Eif4g2	eukaryotic translation initiation factor 4, gamma 2 [Source:MGI Symbol;Acc:MGI:109207]	36551.4	37475.1	37079.2	-0.444518	0.126084	-3.52558	0.000422561	0.00555107	TRUE	FALSE		352.678	365.315	355.485	307.316	344.85	363.136	305.591		357.826	330.223	0.92286	-0.115817
ENSMUSG00000037894	H2afz	H2A histone family, member Z [Source:MGI Symbol;Acc:MGI:1888388]	5229.82	5589.68	5435.45	-0.865973	0.146509	-5.91073	3.406e-09	3.00906e-07	TRUE	FALSE		245.308	361.37	359.375	219.511	199.606	147.354	226.711		322.018	198.296	0.615791	-0.699488
ENSMUSG00000016319	Slc25a5	solute carrier family 25 (mitochondrial carrier, adenine nucleotide translocator), member 5 [Source:MGI Symbol;Acc:MGI:1353496]	6430.21	6507.24	6474.23	-0.561927	0.133132	-4.22082	2.43412e-05	0.000606611	TRUE	FALSE		232.817	295.583	267.826	229.398	214.782	181.532	215.427		265.409	210.285	0.792306	-0.335871
ENSMUSG00000041773	Enc1	ectodermal-neural cortex 1 [Source:MGI Symbol;Acc:MGI:109610]	20970.1	22889.5	22066.9	-0.912236	0.123378	-7.39383	1.42659e-13	3.24307e-11	TRUE	FALSE		249.922	255.996	274.934	169.501	162.989	182.751	168.508		260.284	170.937	0.656734	-0.60662
ENSMUSG00000070576	Mn1	meningioma 1 [Source:MGI Symbol;Acc:MGI:1261813]	65581.4	65586	65584	-0.789888	0.130026	-6.07487	1.24089e-09	1.17418e-07	TRUE	FALSE		207.265	248.185	205.237	132.179	185.591	188.814	144.063		220.229	162.662	0.738603	-0.437129
ENSMUSG00000021546	Hnrnpk	heterogeneous nuclear ribonucleoprotein K [Source:MGI Symbol;Acc:MGI:99894]	20674	21936	21395.1	-0.449192	0.125694	-3.57368	0.000351996	0.00492609	TRUE	FALSE		207.68	219.008	214.312	181.222	203.047	195.689	187.925		213.667	191.971	0.898459	-0.154475
ENSMUSG00000046434	Hnrnpa1	heterogeneous nuclear ribonucleoprotein A1 [Source:MGI Symbol;Acc:MGI:104820]	6403.49	6677.33	6559.97	-0.54711	0.131218	-4.16948	3.05293e-05	0.000724963	TRUE	FALSE		177.56	182.401	183.52	147.562	164.144	168.034	139.381		181.16	154.78	0.854383	-0.227046
ENSMUSG00000003038	Hmgn2	high mobility group nucleosomal binding domain 2 [Source:MGI Symbol;Acc:MGI:96136]	3873.36	4156.8	4035.33	-0.963571	0.131582	-7.32298	2.42529e-13	5.19654e-11	TRUE	FALSE		126.312	162.42	159.217	87.241	90.551	87.033	99.774		149.316	91.1497	0.610447	-0.712061
ENSMUSG00000027852	Nras	neuroblastoma ras oncogene [Source:MGI Symbol;Acc:MGI:97376]	10897.7	11173.2	11055.1	-0.538105	0.124469	-4.32322	1.53769e-05	0.000417032	TRUE	FALSE		137.159	157.17	142.324	122.612	125.733	114.797	118.439		145.551	120.395	0.827169	-0.273746
ENSMUSG00000048216	Gpr85	G protein-coupled receptor 85 [Source:MGI Symbol;Acc:MGI:1927851]	5874.05	6465.18	6211.84	-0.488555	0.131626	-3.71167	0.000205893	0.0032581	TRUE	FALSE		151.259	124.213	143.013	124.193	115.524	133.106	120.929		139.495	123.438	0.884892	-0.176427
ENSMUSG00000028495	Rps6	ribosomal protein S6 [Source:MGI Symbol;Acc:MGI:98159]	2627.46	3009.81	2845.94	-0.539442	0.133662	-4.03587	5.44011e-05	0.00113687	TRUE	FALSE		129.547	129.801	140.132	114.856	99.969	89.392	124.429		133.16	107.161	0.804757	-0.313374
ENSMUSG00000019874	Fabp7	fatty acid binding protein 7, brain [Source:MGI Symbol;Acc:MGI:101916]	2566.63	2475.82	2514.74	-1.04355	0.185772	-5.61738	1.93875e-08	1.40623e-06	TRUE	FALSE		63.387	139.667	123.05	66.118	59.712	31.879	65.061		108.701	55.6925	0.512344	-0.964815
ENSMUSG00000095139	Pou3f2	POU domain, class 3, transcription factor 2 [Source:MGI Symbol;Acc:MGI:101895]	4018.81	4418.5	4247.21	-1.03267	0.130758	-7.89756	2.84418e-15	9.14109e-13	TRUE	FALSE		92.104	106.298	126.816	54.276	64.743	87.599	69.591		108.406	69.0523	0.636978	-0.650684
ENSMUSG00000022234	Cct5	chaperonin containing Tcp1, subunit 5 (epsilon) [Source:MGI Symbol;Acc:MGI:107185]	9421.41	9725.71	9595.29	-0.421028	0.125809	-3.34657	0.000818169	0.00888263	TRUE	FALSE		103.667	107.844	105.134	100.287	98.764	92.805	90.089		105.548	95.4862	0.904668	-0.144539
ENSMUSG00000032294	Pkm	pyruvate kinase, muscle [Source:MGI Symbol;Acc:MGI:97591]	18838.8	19011.9	18937.7	-0.65954	0.127365	-5.17833	2.23876e-07	1.15284e-05	TRUE	FALSE		98.574	114.211	103.745	72.632	92.46	98.062	77.158		105.51	85.078	0.80635	-0.310522
ENSMUSG00000006941	Eif1b	eukaryotic translation initiation factor 1B [Source:MGI Symbol;Acc:MGI:1916219]	1989.57	2120.26	2064.25	-0.706091	0.151936	-4.64729	3.36321e-06	0.000117845	TRUE	FALSE		96.872	111.972	94.204	65.277	73.918	73.972	86.831		101.016	74.9995	0.742452	-0.429631
ENSMUSG00000030057	Cnbp	cellular nucleic acid binding protein [Source:MGI Symbol;Acc:MGI:88431]	5948.62	6401.44	6207.38	-0.512549	0.127378	-4.02386	5.72531e-05	0.00118848	TRUE	FALSE		79.585	102.847	96.396	74.134	87.627	65.444	77.491		92.9427	76.174	0.819581	-0.287042
ENSMUSG00000054766	Set	SET nuclear oncogene [Source:MGI Symbol;Acc:MGI:1860267]	10373.9	10635.2	10523.2	-0.461946	0.126362	-3.65572	0.000256459	0.00385848	TRUE	FALSE		74.689	93.26	88.865	73.918	79.624	71.272	73.504		85.6047	74.5795	0.871208	-0.19891
ENSMUSG00000025203	Scd2	stearoyl-Coenzyme A desaturase 2 [Source:MGI Symbol;Acc:MGI:98240]	8909.86	8855.24	8878.65	-0.5427	0.126771	-4.28096	1.86088e-05	0.000487885	TRUE	FALSE		82.33	86.764	81.254	69.207	74.294	81.732	64.519		83.4493	72.438	0.868048	-0.204154
ENSMUSG00000059878	Zfp422	zinc finger protein 422 [Source:MGI Symbol;Acc:MGI:1914505]	3220.13	3201.87	3209.7	-0.55623	0.132827	-4.18763	2.81879e-05	0.000676257	TRUE	FALSE		77.243	89.989	78.408	68.761	67.081	66.439	67.269		81.88	67.3875	0.823003	-0.28103
ENSMUSG00000057113	Npm1	nucleophosmin 1 [Source:MGI Symbol;Acc:MGI:106184]	6573.41	7179.49	6919.74	-0.516662	0.126562	-4.08228	4.45961e-05	0.000978018	TRUE	FALSE		75.408	81.929	82.121	64.835	69.979	63.651	69.59		79.8193	67.0138	0.839568	-0.252281
ENSMUSG00000027239	Mdk	midkine [Source:MGI Symbol;Acc:MGI:96949]	1163.19	1358.43	1274.75	-1.17217	0.143558	-8.16513	3.21084e-16	1.24694e-13	TRUE	FALSE		60.695	83.363	90.665	33.11	42.435	39.87	49.852		78.241	41.3167	0.52807	-0.921198
ENSMUSG00000003031	Cdkn1b	cyclin-dependent kinase inhibitor 1B [Source:MGI Symbol;Acc:MGI:104565]	2695.49	3244.33	3009.11	-0.54395	0.13895	-3.91473	9.05068e-05	0.00170936	TRUE	FALSE		64.188	78.487	82.524	49.213	64.961	54.243	76.706		75.0663	61.2807	0.816355	-0.292732
ENSMUSG00000060510	Zfp266	zinc finger protein 266 [Source:MGI Symbol;Acc:MGI:1924769]	13911.2	14252.6	14106.3	-0.513002	0.127631	-4.01943	5.83399e-05	0.00120167	TRUE	FALSE		69.263	73.293	60.575	59.662	57.988	51.186	56.261		67.7103	56.2743	0.831103	-0.266901
ENSMUSG00000074480	Mex3a	mex3 homolog A (C. elegans) [Source:MGI Symbol;Acc:MGI:1919890]	4862.4	4824.06	4840.5	-0.58505	0.136457	-4.28743	1.80753e-05	0.000477127	TRUE	FALSE		65.087	78.055	59.653	47.3	68.05	61.722	48.934		67.5983	56.5015	0.835842	-0.258699
ENSMUSG00000001016	Ilf2	interleukin enhancer binding factor 2 [Source:MGI Symbol;Acc:MGI:1915031]	6460.76	6813.07	6662.08	-0.45919	0.126648	-3.62572	0.000288159	0.00422294	TRUE	FALSE		66.065	71.163	65.185	60.127	60.7	53.28	59.469		67.471	58.394	0.865468	-0.208447
ENSMUSG00000060036	Rpl3	ribosomal protein L3 [Source:MGI Symbol;Acc:MGI:1351605]	7202.22	7722.62	7499.59	-0.510879	0.126072	-4.05228	5.07209e-05	0.00107784	TRUE	FALSE		66.994	67.268	67.847	61.237	54.109	51.275	58.58		67.3697	56.3003	0.835691	-0.258958
ENSMUSG00000023456	Tpi1	triosephosphate isomerase 1 [Source:MGI Symbol;Acc:MGI:98797]	2089.25	1963.11	2017.17	-0.473281	0.136107	-3.47727	0.000506551	0.00624099	TRUE	FALSE		62.304	71.304	63.991	59.036	57.725	68.154	54.977		65.8663	59.973	0.910526	-0.135228
ENSMUSG00000051223	Bzw1	basic leucine zipper and W2 domains 1 [Source:MGI Symbol;Acc:MGI:1914132]	6707.36	7284.85	7037.35	-0.474868	0.126539	-3.75273	0.00017492	0.002883	TRUE	FALSE		58.818	61.437	61.312	52.109	54.282	49.239	53.332		60.5223	52.2405	0.863161	-0.212299
ENSMUSG00000020649	Rrm2	ribonucleotide reductase M2 [Source:MGI Symbol;Acc:MGI:98181]	1888.05	1819.18	1848.69	-2.25759	0.155073	-14.5582	5.17898e-48	1.93083e-44	TRUE	FALSE		41.818	74.167	62.993	13.693	16.443	13.535	13.006		59.6593	14.1693	0.237503	-2.07398
ENSMUSG00000013698	Pea15a	phosphoprotein enriched in astrocytes 15A [Source:MGI Symbol;Acc:MGI:104799]	3996.3	4162.27	4091.14	-1.00921	0.135718	-7.43604	1.03749e-13	2.4746e-11	TRUE	FALSE		46.634	65.244	65.98	33.484	36.515	36.047	35.487		59.286	35.3832	0.596823	-0.744625
ENSMUSG00000019432	Ddx39b	DEAD (Asp-Glu-Ala-Asp) box polypeptide 39B [Source:MGI Symbol;Acc:MGI:99240]	5314.7	5269.18	5288.69	-0.533242	0.129041	-4.13236	3.5906e-05	0.00082025	TRUE	FALSE		52.327	56.633	56.237	48.513	46.423	51.403	43.434		55.0657	47.4432	0.861576	-0.21495
ENSMUSG00000030654	Arl6ip1	ADP-ribosylation factor-like 6 interacting protein 1 [Source:MGI Symbol;Acc:MGI:1858943]	4438.06	4712.81	4595.06	-0.51449	0.132561	-3.88116	0.000103959	0.00189651	TRUE	FALSE		55.721	55.811	50.667	48.093	43.474	40.29	47.646		54.0663	44.8757	0.830013	-0.268794
ENSMUSG00000031311	Nono	non-POU-domain-containing, octamer binding protein [Source:MGI Symbol;Acc:MGI:1855692]	8178	8228.49	8206.85	-0.520428	0.128483	-4.05057	5.10925e-05	0.00108352	TRUE	FALSE		49.925	54.349	52.937	43.107	48.449	51.875	41.16		52.4037	46.1477	0.880621	-0.183407
ENSMUSG00000028675	Pnrc2	proline-rich nuclear receptor coactivator 2 [Source:MGI Symbol;Acc:MGI:106512]	1121.71	1183.66	1157.11	-0.618347	0.149681	-4.13109	3.61044e-05	0.000822765	TRUE	FALSE		46.142	57.111	53.198	42.211	39.083	32.803	43.835		52.1503	39.483	0.7571	-0.401445
ENSMUSG00000020708	Psmc5	protease (prosome, macropain) 26S subunit, ATPase 5 [Source:MGI Symbol;Acc:MGI:105047]	2825.6	2954.93	2899.5	-0.45391	0.134115	-3.38447	0.000713154	0.00801705	TRUE	FALSE		49.557	52.737	50.325	44.083	49.269	45.754	42.445		50.873	45.3877	0.892178	-0.164597
ENSMUSG00000053907	Mat2a	methionine adenosyltransferase II, alpha [Source:MGI Symbol;Acc:MGI:2443731]	2858	2789.19	2818.68	-0.43669	0.131733	-3.31497	0.000916528	0.00957143	TRUE	FALSE		48.228	53.687	49.081	46.232	46.542	49.126	42.642		50.332	46.1355	0.916624	-0.125599
ENSMUSG00000003464	Pex19	peroxisomal biogenesis factor 19 [Source:MGI Symbol;Acc:MGI:1334458]	3859.08	4056.73	3972.02	-0.454336	0.131534	-3.45414	0.000552048	0.00665636	TRUE	FALSE		47.961	51.164	49.986	42.072	47.509	46.145	42.842		49.7037	44.642	0.898163	-0.154951
ENSMUSG00000021241	Isca2	iron-sulfur cluster assembly 2 [Source:MGI Symbol;Acc:MGI:1921566]	586.545	718.269	661.816	-0.613305	0.16806	-3.64933	0.000262926	0.00392094	TRUE	FALSE		46.627	47.199	51.386	39.504	31.629	25.06	49.05		48.404	36.3107	0.75016	-0.41473
ENSMUSG00000032178	Ilf3	interleukin enhancer binding factor 3 [Source:MGI Symbol;Acc:MGI:1339973]	14297.9	14726.5	14542.8	-0.465233	0.125767	-3.69917	0.000216304	0.00338834	TRUE	FALSE		47.182	48.737	46.469	40.961	44.284	45.203	40.14		47.4627	42.647	0.898538	-0.154349
ENSMUSG00000017390	Aldoc	aldolase C, fructose-bisphosphate [Source:MGI Symbol;Acc:MGI:101863]	1148.53	1026.94	1079.05	-2.01377	0.362196	-5.55987	2.69969e-08	1.87082e-06	TRUE	FALSE		23.108	56.428	51.014	10.66	11.974	8.252	6.711		43.5167	9.39925	0.215992	-2.21095
ENSMUSG00000034701	Neurod1	neurogenic differentiation 1 [Source:MGI Symbol;Acc:MGI:1339708]	1406.53	1329.08	1362.27	-0.748499	0.168858	-4.43271	9.30564e-06	0.000273175	TRUE	FALSE		39.918	57.135	32.988	23.407	37.229	31.549	31.826		43.347	31.0027	0.715223	-0.483536
ENSMUSG00000029146	Snx17	sorting nexin 17 [Source:MGI Symbol;Acc:MGI:2387801]	1977.59	2001.87	1991.46	-0.488291	0.13769	-3.54631	0.000390664	0.00527707	TRUE	FALSE		38.547	46.707	40.097	34.055	37.534	35.634	37.073		41.7837	36.074	0.863352	-0.21198
ENSMUSG00000093930	Hmgcs1	3-hydroxy-3-methylglutaryl-Coenzyme A synthase 1 [Source:MGI Symbol;Acc:MGI:107592]	5863.97	5749.35	5798.47	-0.556781	0.132637	-4.19779	2.69533e-05	0.000655067	TRUE	FALSE		42.994	44.125	37.619	36.576	32.116	35.982	34.245		41.5793	34.7298	0.835265	-0.259695
ENSMUSG00000023832	Acat2	acetyl-Coenzyme A acetyltransferase 2 [Source:MGI Symbol;Acc:MGI:87871]	6236.44	6028.55	6117.65	-0.455465	0.127143	-3.58232	0.000340558	0.00479844	TRUE	FALSE		40.283	44.703	39.515	37.258	37.06	41.001	35.747		41.5003	37.7665	0.910029	-0.136016
ENSMUSG00000026276	2016-09-02	septin 2 [Source:MGI Symbol;Acc:MGI:97298]	10038.3	9965.34	9996.63	-0.549032	0.138477	-3.96479	7.34604e-05	0.00144145	TRUE	FALSE		37.599	47.939	38.525	36.143	32.355	26.694	35.546		41.3543	32.6845	0.790352	-0.339432
ENSMUSG00000007850	Hnrnph1	heterogeneous nuclear ribonucleoprotein H1 [Source:MGI Symbol;Acc:MGI:1891925]	3067.51	3248.36	3170.85	-0.472697	0.130777	-3.61452	0.000300904	0.00435155	TRUE	FALSE		36.944	43.569	42.577	33.234	37.159	35.633	37.607		41.03	35.9083	0.875171	-0.192364
ENSMUSG00000041124	Msantd4	Myb/SANT-like DNA-binding domain containing 4 with coiled-coils [Source:MGI Symbol;Acc:MGI:1925350]	1045.03	1085.29	1068.03	-0.531709	0.147539	-3.60385	0.000313535	0.00449585	TRUE	FALSE		42.492	38.79	40.747	40.053	31.222	32.408	32.123		40.6763	33.9515	0.834675	-0.260714
ENSMUSG00000048371	Pdp2	pyruvate dehyrogenase phosphatase catalytic subunit 2 [Source:MGI Symbol;Acc:MGI:1918878]	1714.7	1698.27	1705.31	-0.611632	0.141734	-4.31535	1.59347e-05	0.000429635	TRUE	FALSE		40.906	39.97	40.772	36.191	31.48	36.654	28.655		40.5493	33.245	0.819866	-0.286541
ENSMUSG00000015165	Hnrnpl	heterogeneous nuclear ribonucleoprotein L [Source:MGI Symbol;Acc:MGI:104816]	4046.27	4414.31	4256.58	-0.569036	0.132838	-4.28368	1.83828e-05	0.000483321	TRUE	FALSE		32.356	44.651	43.042	28.265	32.482	28.582	38.099		40.0163	31.857	0.7961	-0.328979
ENSMUSG00000029730	Mcm7	minichromosome maintenance deficient 7 (S. cerevisiae) [Source:MGI Symbol;Acc:MGI:1298398]	2374.36	2176.91	2261.53	-0.824101	0.147422	-5.59008	2.2697e-08	1.60263e-06	TRUE	FALSE		33.757	47.19	38.625	28.821	26.337	27.844	25.818		39.8573	27.205	0.682559	-0.550973
ENSMUSG00000015217	Hmgb3	high mobility group box 3 [Source:MGI Symbol;Acc:MGI:1098219]	1401.27	1410.52	1406.55	-0.708702	0.145863	-4.85869	1.18164e-06	4.88401e-05	TRUE	FALSE		32.206	44.606	41.62	27.304	28.481	29.461	31.427		39.4773	29.1683	0.738861	-0.436626
ENSMUSG00000040746	Rnf167	ring finger protein 167 [Source:MGI Symbol;Acc:MGI:1917760]	1300.29	1321.22	1312.25	-0.477167	0.141816	-3.36468	0.000766333	0.00845779	TRUE	FALSE		34.793	41.131	39.499	31.824	34.599	35.939	33.941		38.4743	34.0757	0.885675	-0.175151
ENSMUSG00000027067	Ssrp1	structure specific recognition protein 1 [Source:MGI Symbol;Acc:MGI:107912]	3039.96	2980.41	3005.93	-0.531471	0.13346	-3.98224	6.82676e-05	0.00136104	TRUE	FALSE		37.081	39.524	36.052	31.477	34.428	37.312	28.34		37.5523	32.8892	0.875824	-0.191286
ENSMUSG00000021178	Psmc1	protease (prosome, macropain) 26S subunit, ATPase 1 [Source:MGI Symbol;Acc:MGI:106054]	3930.2	4114.18	4035.33	-0.448463	0.129859	-3.45346	0.000553448	0.00666462	TRUE	FALSE		35.526	39.037	37.692	32.319	35.62	33.385	32.327		37.4183	33.4127	0.892951	-0.163347
ENSMUSG00000023004	Tuba1b	tubulin, alpha 1B [Source:MGI Symbol;Acc:MGI:107804]	894.996	875.968	884.123	-0.711458	0.158439	-4.49041	7.10858e-06	0.000219026	TRUE	FALSE		31.023	40.199	40.269	27.041	29.317	31.837	24.602		37.1637	28.1993	0.758785	-0.398236
ENSMUSG00000033272	Slc35a4	solute carrier family 35, member A4 [Source:MGI Symbol;Acc:MGI:1915093]	1312.28	1295.85	1302.89	-0.696418	0.142471	-4.88813	1.01801e-06	4.29336e-05	TRUE	FALSE		33.855	41.495	35.897	27.285	29.925	28.882	25.67		37.0823	27.9405	0.753472	-0.408374
ENSMUSG00000021427	Ssr1	signal sequence receptor, alpha [Source:MGI Symbol;Acc:MGI:105082]	6548.7	6683.71	6625.85	-0.453171	0.127962	-3.54146	0.000397912	0.00534947	TRUE	FALSE		34.635	39.442	33.933	32.342	32.394	28.583	31.757		36.0033	31.269	0.868503	-0.203397
ENSMUSG00000040459	Arglu1	arginine and glutamate rich 1 [Source:MGI Symbol;Acc:MGI:2442985]	6879.6	6943.73	6916.24	-0.547568	0.155718	-3.51641	0.000437421	0.00567746	TRUE	FALSE		29.042	42.044	34.859	29.418	25.32	21.358	34.814		35.315	27.7275	0.785148	-0.348964
ENSMUSG00000005846	Rsl1d1	ribosomal L1 domain containing 1 [Source:MGI Symbol;Acc:MGI:1913659]	2797.37	2844.83	2824.49	-0.489366	0.134068	-3.65012	0.000262117	0.00391203	TRUE	FALSE		31.361	36.406	34.241	30.044	28.389	28.049	30.194		34.0027	29.169	0.857844	-0.221212
ENSMUSG00000070526	Peg12	paternally expressed 12 [Source:MGI Symbol;Acc:MGI:1351637]	582.848	513.855	543.423	-1.42413	0.196901	-7.23271	4.73437e-13	9.69818e-11	TRUE	FALSE		23.834	43.573	34.26	16.315	16.684	12.781	11.213		33.889	14.2483	0.420439	-1.25003
ENSMUSG00000020607	Fam84a	family with sequence similarity 84, member A [Source:MGI Symbol;Acc:MGI:2145011]	1275.31	1149.55	1203.45	-0.566794	0.163335	-3.47013	0.000520208	0.00636299	TRUE	FALSE		40.857	31.089	27.258	31.125	20.138	40.773	27.885		33.068	29.9803	0.906624	-0.141423
ENSMUSG00000066979	Bub3	BUB3 mitotic checkpoint protein [Source:MGI Symbol;Acc:MGI:1343463]	3025.92	3044.69	3036.65	-0.500889	0.133205	-3.76028	0.000169726	0.00281955	TRUE	FALSE		29.995	36.158	31.056	26.487	28.66	27.639	28.348		32.403	27.7835	0.857436	-0.221899
ENSMUSG00000059552	Trp53	transformation related protein 53 [Source:MGI Symbol;Acc:MGI:98834]	2958.41	3016.44	2991.57	-0.566347	0.142087	-3.98593	6.72169e-05	0.00134875	TRUE	FALSE		29.712	33.857	33.585	24.703	31.41	31.523	23.227		32.3847	27.7157	0.855829	-0.224605
ENSMUSG00000096210	H1f0	H1 histone family, member 0 [Source:MGI Symbol;Acc:MGI:95893]	495.958	565.34	535.605	-0.787729	0.169338	-4.65183	3.29004e-06	0.000115716	TRUE	FALSE		30.497	31.218	34.701	21.459	23.504	22.56	22.034		32.1387	22.3892	0.696645	-0.521504
ENSMUSG00000071072	Ptges3	prostaglandin E synthase 3 (cytosolic) [Source:MGI Symbol;Acc:MGI:1929282]	4609.82	4811.31	4724.96	-0.461058	0.129832	-3.55119	0.000383493	0.00521674	TRUE	FALSE		28.223	34.2	33.627	28.148	29.217	25.652	27.769		32.0167	27.6965	0.865065	-0.209119
ENSMUSG00000037058	Paip2	polyadenylate-binding protein-interacting protein 2 [Source:MGI Symbol;Acc:MGI:1915119]	4389.1	4773.08	4608.52	-0.49589	0.140588	-3.52726	0.000419877	0.0055314	TRUE	FALSE		30.467	32.444	31.968	29.932	22.928	20.264	31.006		31.6263	26.0325	0.823127	-0.280812
ENSMUSG00000002660	Clpp	caseinolytic mitochondrial matrix peptidase proteolytic subunit [Source:MGI Symbol;Acc:MGI:1858213]	1592.01	1529.38	1556.22	-0.478738	0.141528	-3.38263	0.000717958	0.00804294	TRUE	FALSE		28.666	34.562	30.956	28.397	27.391	28.456	26.149		31.3947	27.5983	0.879074	-0.185943
ENSMUSG00000068882	Ssb	Sjogren syndrome antigen B [Source:MGI Symbol;Acc:MGI:98423]	2427.82	2609.97	2531.91	-0.543766	0.135569	-4.01098	6.04664e-05	0.00124136	TRUE	FALSE		30.556	31.63	31.496	26.141	27.778	24.92	24.468		31.2273	25.8268	0.827056	-0.273943
ENSMUSG00000057497	Fam136a	family with sequence similarity 136, member A [Source:MGI Symbol;Acc:MGI:1913738]	1012.09	1116.02	1071.48	-0.530643	0.154666	-3.4309	0.000601584	0.00710158	TRUE	FALSE		34.555	29.979	28.486	28.222	22.632	22.464	28.363		31.0067	25.4202	0.819832	-0.2866
ENSMUSG00000045294	Insig1	insulin induced gene 1 [Source:MGI Symbol;Acc:MGI:1916289]	1639.22	1727.2	1689.49	-0.647719	0.165673	-3.90963	9.24372e-05	0.001732	TRUE	FALSE		28.051	35.224	28.1	20.45	21.615	21.23	29.585		30.4583	23.22	0.762353	-0.391469
ENSMUSG00000022451	Twf1	twinfilin, actin-binding protein, homolog 1 (Drosophila) [Source:MGI Symbol;Acc:MGI:1100520]	2675.21	2899.82	2803.56	-0.455876	0.132794	-3.43294	0.000597063	0.00707153	TRUE	FALSE		26.872	31.954	29.79	26.251	26.439	19.706	26.943		29.5387	24.8347	0.840754	-0.250244
ENSMUSG00000017421	Zfp207	zinc finger protein 207 [Source:MGI Symbol;Acc:MGI:1340045]	5189.17	5068.16	5120.02	-0.49051	0.141614	-3.46372	0.000532759	0.00648248	TRUE	FALSE		24.481	34.533	28.05	26.076	24.335	19.207	25.451		29.0213	23.7672	0.818958	-0.288139
ENSMUSG00000063229	Ldha	lactate dehydrogenase A [Source:MGI Symbol;Acc:MGI:96759]	3224.05	3195.21	3207.57	-0.566782	0.131988	-4.2942	1.75325e-05	0.00046556	TRUE	FALSE		31.49	29.178	26.271	28.43	21.98	22.703	21.547		28.9797	23.665	0.816607	-0.292286
ENSMUSG00000024740	Ddb1	damage specific DNA binding protein 1 [Source:MGI Symbol;Acc:MGI:1202384]	5406	5533.3	5478.74	-0.550194	0.130974	-4.20079	2.65983e-05	0.00064813	TRUE	FALSE		27.435	29.466	28.363	23.605	25.929	25.338	21.245		28.4213	24.0293	0.845465	-0.242183
ENSMUSG00000054717	Hmgb2	high mobility group box 2 [Source:MGI Symbol;Acc:MGI:96157]	687.995	660.823	672.468	-1.63554	0.164053	-9.96961	2.07037e-23	2.03126e-20	TRUE	FALSE		22.38	34.585	26.17	10.035	11.601	9.175	9.946		27.7117	10.1893	0.367688	-1.44345
ENSMUSG00000000563	Atp5f1	ATP synthase, H+ transporting, mitochondrial F0 complex, subunit B1 [Source:MGI Symbol;Acc:MGI:1100495]	3575.75	4127.99	3891.32	-0.437608	0.129526	-3.37853	0.000728744	0.00813831	TRUE	FALSE		26.572	25.476	30.956	25.243	23.172	21.982	26.571		27.668	24.242	0.876175	-0.19071
ENSMUSG00000018669	Cdk5rap3	CDK5 regulatory subunit associated protein 3 [Source:MGI Symbol;Acc:MGI:1933126]	1948.54	2024.77	1992.1	-0.498924	0.135999	-3.66857	0.000243906	0.00371057	TRUE	FALSE		26.084	27.594	28.261	24.115	23.36	23.93	23.011		27.313	23.604	0.864204	-0.210556
ENSMUSG00000001313	Rnd2	Rho family GTPase 2 [Source:MGI Symbol;Acc:MGI:1338755]	1162.78	1369.01	1280.63	-0.772735	0.149412	-5.17185	2.31792e-07	1.19031e-05	TRUE	FALSE		25.529	25.799	27.387	20.946	19.605	11.75	16.774		26.2383	17.2688	0.65815	-0.603512
ENSMUSG00000030751	Psma1	proteasome (prosome, macropain) subunit, alpha type 1 [Source:MGI Symbol;Acc:MGI:1347005]	2244.33	2508.47	2395.27	-0.457344	0.133788	-3.41842	0.000629852	0.00732815	TRUE	FALSE		23.759	25.88	28.36	23.183	22.254	19.342	24.232		25.9997	22.2527	0.855886	-0.224509
ENSMUSG00000021270	Hsp90aa1	heat shock protein 90, alpha (cytosolic), class A member 1 [Source:MGI Symbol;Acc:MGI:96250]	2514.47	2498.13	2505.13	-0.440229	0.133296	-3.30263	0.000957815	0.00983576	TRUE	FALSE		24.853	26.021	23.864	22.435	23.18	24.748	21.185		24.9127	22.887	0.918689	-0.122351
ENSMUSG00000026385	Dbi	diazepam binding inhibitor [Source:MGI Symbol;Acc:MGI:94865]	1168.73	1196.54	1184.62	-1.27335	0.187165	-6.80334	1.02221e-11	1.58791e-09	TRUE	FALSE		15.999	27.982	29.329	13.101	10.11	8.792	12.803		24.4367	11.2015	0.458389	-1.12536
ENSMUSG00000033047	Eif3l	eukaryotic translation initiation factor 3, subunit L [Source:MGI Symbol;Acc:MGI:2386251]	3681.43	3872.06	3790.36	-0.466469	0.136257	-3.42344	0.000618339	0.00722567	TRUE	FALSE		23.922	24.244	24.301	21.067	23.664	22.4	19.14		24.1557	21.5678	0.892865	-0.163486
ENSMUSG00000018160	Med1	mediator complex subunit 1 [Source:MGI Symbol;Acc:MGI:1100846]	8108.01	8224.86	8174.78	-0.424392	0.125419	-3.3838	0.000714911	0.00801845	TRUE	FALSE		22.838	26.433	23.127	21.263	23.507	21.314	21.045		24.1327	21.7823	0.902604	-0.147834
ENSMUSG00000028953	Abcf2	ATP-binding cassette, sub-family F (GCN20), member 2 [Source:MGI Symbol;Acc:MGI:1351657]	2332.15	2376.63	2357.56	-0.46392	0.134084	-3.45993	0.000540318	0.00654391	TRUE	FALSE		22.257	26.33	23.109	19.875	22.594	20.97	20.795		23.8987	21.0585	0.881158	-0.182527
ENSMUSG00000026701	Prdx6	peroxiredoxin 6 [Source:MGI Symbol;Acc:MGI:894320]	1950.71	2025.91	1993.68	-0.675211	0.135582	-4.98008	6.35587e-07	2.87572e-05	TRUE	FALSE		20.353	26.957	23.896	16.046	19.795	17.33	18.242		23.7353	17.8532	0.75218	-0.41085
ENSMUSG00000021811	Dnajc9	DnaJ heat shock protein family (Hsp40) member C9 [Source:MGI Symbol;Acc:MGI:1915326]	706.971	822.876	773.202	-0.638816	0.160722	-3.97466	7.04808e-05	0.00139287	TRUE	FALSE		21.065	24.106	25.549	14.784	20.19	18.366	20.198		23.5733	18.3845	0.779885	-0.358666
ENSMUSG00000027342	Pcna	proliferating cell nuclear antigen [Source:MGI Symbol;Acc:MGI:97503]	683.643	685.157	684.508	-0.896485	0.174736	-5.13052	2.88949e-07	1.44793e-05	TRUE	FALSE		20.49	26.501	23.617	16.187	12.849	13.51	17.082		23.536	14.907	0.63337	-0.658879
ENSMUSG00000021670	Hmgcr	3-hydroxy-3-methylglutaryl-Coenzyme A reductase [Source:MGI Symbol;Acc:MGI:96159]	4118.97	4207.99	4169.84	-0.495842	0.129757	-3.82132	0.000132739	0.00231467	TRUE	FALSE		24.688	22.877	22.518	21.271	20.124	22.257	18.887		23.361	20.6348	0.883299	-0.179026
ENSMUSG00000026926	Pmpca	peptidase (mitochondrial processing) alpha [Source:MGI Symbol;Acc:MGI:1918568]	1343.28	1430.94	1393.37	-0.604602	0.146029	-4.14029	3.46872e-05	0.000798276	TRUE	FALSE		19.722	25.099	24.277	16.229	21.737	18.419	17.181		23.0327	18.3915	0.798496	-0.324642
ENSMUSG00000060373	Hnrnpc	heterogeneous nuclear ribonucleoprotein C [Source:MGI Symbol;Acc:MGI:107795]	5275.35	5750.95	5547.12	-0.448376	0.126804	-3.53597	0.000406276	0.0054096	TRUE	FALSE		20.562	22.858	23.703	19.457	19.753	18.051	20.96		22.3743	19.5553	0.874004	-0.194289
ENSMUSG00000023170	Gps2	G protein pathway suppressor 2 [Source:MGI Symbol;Acc:MGI:1891751]	445.03	482.699	466.555	-0.645618	0.188969	-3.41653	0.000634246	0.0073526	TRUE	FALSE		22.6	22.561	21.074	13.764	21.18	21.069	15.376		22.0783	17.8473	0.80836	-0.306929
ENSMUSG00000058267	Mrps14	mitochondrial ribosomal protein S14 [Source:MGI Symbol;Acc:MGI:1928141]	1126.28	1186.27	1160.56	-0.604391	0.154172	-3.92023	8.84634e-05	0.00167586	TRUE	FALSE		18.695	23.485	23.883	19.003	16.38	13.688	17.96		22.021	16.7578	0.76099	-0.394052
ENSMUSG00000020423	Btg2	B cell translocation gene 2, anti-proliferative [Source:MGI Symbol;Acc:MGI:108384]	603.453	632.333	619.956	-0.840286	0.176224	-4.7683	1.85791e-06	7.12619e-05	TRUE	FALSE		20.839	20.519	24.511	18.951	11.701	14.077	14.296		21.9563	14.7562	0.672073	-0.573311
ENSMUSG00000028076	Cd1d1	CD1d1 antigen [Source:MGI Symbol;Acc:MGI:107674]	597.02	595.049	595.894	-0.662288	0.167912	-3.94426	8.00465e-05	0.0015527	TRUE	FALSE		19.184	24.511	22.151	17.551	15.951	15.145	17.033		21.9487	16.42	0.748109	-0.418679
ENSMUSG00000015749	Anp32e	acidic (leucine-rich) nuclear phosphoprotein 32 family, member E [Source:MGI Symbol;Acc:MGI:1913721]	3332.34	2975.5	3128.43	-0.679139	0.140819	-4.82278	1.4157e-06	5.68751e-05	TRUE	FALSE		20.924	24.441	20.306	17.239	19.644	22.625	12.549		21.8903	18.0142	0.822932	-0.281155
ENSMUSG00000039630	Hnrnpu	heterogeneous nuclear ribonucleoprotein U [Source:MGI Symbol;Acc:MGI:1858195]	2327.33	2384.2	2359.83	-0.470651	0.13395	-3.51362	0.000442037	0.00570242	TRUE	FALSE		19.528	23.308	21.958	18.186	20.364	19.03	18.3		21.598	18.97	0.878322	-0.187178
ENSMUSG00000028788	Ptp4a2	protein tyrosine phosphatase 4a2 [Source:MGI Symbol;Acc:MGI:1277117]	6826.47	6647.34	6724.11	-0.495022	0.12817	-3.86224	0.000112353	0.00201382	TRUE	FALSE		20.594	24.522	19.226	17.719	20.138	19.064	17.524		21.4473	18.6112	0.867765	-0.204623
ENSMUSG00000052419	2610001J05Rik	RIKEN cDNA 2610001J05 gene [Source:MGI Symbol;Acc:MGI:1913770]	485.442	607.224	555.032	-0.98008	0.187922	-5.21535	1.83468e-07	9.68848e-06	TRUE	FALSE		21.918	18.148	22.586	9.874	13.474	16.508	13.554		20.884	13.3525	0.639365	-0.645288
ENSMUSG00000078453	Abracl	ABRA C-terminal like [Source:MGI Symbol;Acc:MGI:1920362]	1756.94	2043.22	1920.53	-0.552808	0.137263	-4.02738	5.64028e-05	0.00117213	TRUE	FALSE		19.733	19.047	23.222	17.856	15.927	14.658	17.898		20.6673	16.5847	0.802462	-0.317495
ENSMUSG00000036968	Cnpy4	canopy FGF signaling regulator 4 [Source:MGI Symbol;Acc:MGI:1913705]	1008.21	1046.48	1030.08	-0.629817	0.151724	-4.15106	3.30943e-05	0.000768978	TRUE	FALSE		19.488	22.536	19.775	14.272	18.774	17.515	15.239		20.5997	16.45	0.798557	-0.324533
ENSMUSG00000004035	Gstm7	glutathione S-transferase, mu 7 [Source:MGI Symbol;Acc:MGI:1915562]	895.013	906.44	901.543	-0.545322	0.150763	-3.61708	0.000297945	0.00431546	TRUE	FALSE		20.127	19.94	21.074	16.963	16.702	20.862	16.52		20.3803	17.7617	0.871514	-0.198404
ENSMUSG00000025869	Nop16	NOP16 nucleolar protein [Source:MGI Symbol;Acc:MGI:107862]	877.774	964.714	927.454	-0.538661	0.151517	-3.55511	0.000377825	0.00516986	TRUE	FALSE		19.156	19.841	21.106	17.225	14.961	15.046	18.59		20.0343	16.4555	0.821365	-0.283905
ENSMUSG00000018362	Kpna2	karyopherin (importin) alpha 2 [Source:MGI Symbol;Acc:MGI:103561]	1459.32	1332.8	1387.02	-1.25875	0.157237	-8.00541	1.19067e-15	4.03549e-13	TRUE	FALSE		17.047	24.605	17.824	9.981	9.482	9.99	9.936		19.8253	9.84725	0.4967	-1.00955
ENSMUSG00000035198	Tubg1	tubulin, gamma 1 [Source:MGI Symbol;Acc:MGI:101834]	961.213	1022.09	996.001	-0.623222	0.150558	-4.1394	3.48213e-05	0.000799388	TRUE	FALSE		20.355	19.763	19.304	15.277	15.26	16.914	16.032		19.8073	15.8708	0.801256	-0.319664
ENSMUSG00000041815	Poldip3	polymerase (DNA-directed), delta interacting protein 3 [Source:MGI Symbol;Acc:MGI:1921076]	3769.15	3745.39	3755.57	-0.465357	0.131848	-3.5295	0.000416352	0.00549662	TRUE	FALSE		18.981	21.916	18.199	16.773	18.096	17.58	17.139		19.6987	17.397	0.883156	-0.179259
ENSMUSG00000042436	Mfap4	microfibrillar-associated protein 4 [Source:MGI Symbol;Acc:MGI:1342276]	451.3	429.398	438.785	-1.21385	0.176281	-6.88586	5.74393e-12	9.56006e-10	TRUE	FALSE		15.595	23.61	19.038	8.952	11.541	10.886	8.855		19.4143	10.0585	0.518097	-0.948707
ENSMUSG00000054408	Spcs3	signal peptidase complex subunit 3 homolog (S. cerevisiae) [Source:MGI Symbol;Acc:MGI:1923937]	1403.12	1520.11	1469.97	-0.470473	0.142227	-3.3079	0.000939969	0.0097244	TRUE	FALSE		18.041	19.686	20.334	18.193	15.907	13.543	17.569		19.3537	16.303	0.842373	-0.247469
ENSMUSG00000044018	Mrpl50	mitochondrial ribosomal protein L50 [Source:MGI Symbol;Acc:MGI:107329]	1220.83	1335.65	1286.44	-0.505011	0.151527	-3.33281	0.000859746	0.00917374	TRUE	FALSE		20.116	19.442	18.199	17.708	14.37	13.16	18.369		19.2523	15.9017	0.825965	-0.275848
ENSMUSG00000020949	Fkbp3	FK506 binding protein 3 [Source:MGI Symbol;Acc:MGI:1353460]	1599.42	1833.67	1733.27	-0.503454	0.140991	-3.57082	0.000355865	0.00495977	TRUE	FALSE		18.361	19.823	19.533	16.164	15.709	12.329	18.568		19.239	15.6925	0.815661	-0.293959
ENSMUSG00000028044	Cks1b	CDC28 protein kinase 1b [Source:MGI Symbol;Acc:MGI:1889208]	373.687	384.485	379.857	-0.994084	0.190637	-5.21454	1.84277e-07	9.70367e-06	TRUE	FALSE		17.428	21.96	18.222	11.544	10.454	9.866	13.036		19.2033	11.225	0.584534	-0.774641
ENSMUSG00000029247	Paics	phosphoribosylaminoimidazole carboxylase, phosphoribosylaminoribosylaminoimidazole, succinocarboxamide synthetase [Source:MGI Symbol;Acc:MGI:1914304]	2026.43	2325.46	2197.3	-0.904448	0.138586	-6.52624	6.74407e-11	8.79134e-09	TRUE	FALSE		15.017	19.623	22.823	10.185	13.429	12.989	13.105		19.1543	12.427	0.648783	-0.624193
ENSMUSG00000003778	Brd8	bromodomain containing 8 [Source:MGI Symbol;Acc:MGI:1925906]	3836.56	3723.99	3772.23	-0.585053	0.144346	-4.05314	5.05357e-05	0.00107538	TRUE	FALSE		16.924	22.087	17.694	16.003	14.236	12.876	15.924		18.9017	14.7598	0.78087	-0.356845
ENSMUSG00000035202	Lars2	leucyl-tRNA synthetase, mitochondrial [Source:MGI Symbol;Acc:MGI:2142973]	13582.7	14720.3	14232.8	-0.583319	0.14352	-4.06439	4.81588e-05	0.00103904	TRUE	FALSE		18.56	15.884	21.179	14.904	15.394	19.896	13.825		18.541	16.0048	0.863209	-0.212219
ENSMUSG00000024587	Nars	asparaginyl-tRNA synthetase [Source:MGI Symbol;Acc:MGI:1917473]	2585.26	2504.63	2539.18	-0.47209	0.134003	-3.52298	0.000426721	0.0055782	TRUE	FALSE		17.172	20.193	17.998	16.598	16.304	16.908	15.538		18.4543	16.337	0.885266	-0.175817
ENSMUSG00000031760	Mt3	metallothionein 3 [Source:MGI Symbol;Acc:MGI:97173]	146.586	157.101	152.595	-1.89962	0.255332	-7.43982	1.0082e-13	2.45666e-11	TRUE	FALSE		10.022	22.175	23.01	4.965	5.677	3.014	6.156		18.4023	4.953	0.269151	-1.89351
ENSMUSG00000074909	Ranbp6	RAN binding protein 6 [Source:MGI Symbol;Acc:MGI:2683212]	690.29	644.946	664.379	-0.567664	0.161807	-3.50827	0.000451038	0.00578651	TRUE	FALSE		18.618	19.905	16.57	16.596	14.075	16.458	14.173		18.3643	15.3255	0.834525	-0.260972
ENSMUSG00000058291	Zfp68	zinc finger protein 68 [Source:MGI Symbol;Acc:MGI:1344427]	2199.36	2364.41	2293.68	-0.451821	0.134207	-3.3666	0.000761019	0.0084091	TRUE	FALSE		18.157	17.749	17.348	17.191	14.977	13.109	15.788		17.7513	15.2662	0.860006	-0.217582
ENSMUSG00000005732	Ranbp1	RAN binding protein 1 [Source:MGI Symbol;Acc:MGI:96269]	1122.13	1237.33	1187.96	-0.689399	0.178346	-3.8655	0.00011086	0.00199089	TRUE	FALSE		19.073	17.848	15.317	11.015	11.946	14.655	16.055		17.4127	13.4177	0.770574	-0.375994
ENSMUSG00000054405	Dnajc8	DnaJ heat shock protein family (Hsp40) member C8 [Source:MGI Symbol;Acc:MGI:1915848]	2478.07	2640.77	2571.04	-0.467156	0.132495	-3.52584	0.000422138	0.00554942	TRUE	FALSE		15.831	17.762	18.514	14.439	15.159	15.652	16.228		17.369	15.3695	0.884881	-0.176444
ENSMUSG00000024826	Dpf2	D4, zinc and double PHD fingers family 2 [Source:MGI Symbol;Acc:MGI:109529]	2299.11	2214.97	2251.03	-0.50963	0.142149	-3.58518	0.000336848	0.00475696	TRUE	FALSE		14.752	19.825	17.105	15.253	14.581	13.374	14.297		17.2273	14.3762	0.834502	-0.261012
ENSMUSG00000071660	Ttc9c	tetratricopeptide repeat domain 9C [Source:MGI Symbol;Acc:MGI:1917637]	1402.19	1392.78	1396.81	-0.505082	0.147276	-3.42948	0.000604733	0.00712546	TRUE	FALSE		15.838	17.056	17.581	15.326	14.963	15.905	12.727		16.825	14.7303	0.875498	-0.191825
ENSMUSG00000079111	Kdelr2	KDEL (Lys-Asp-Glu-Leu) endoplasmic reticulum protein retention receptor 2 [Source:MGI Symbol;Acc:MGI:1914163]	2295.65	2549.65	2440.79	-0.46956	0.13673	-3.43421	0.00059429	0.00705167	TRUE	FALSE		15.242	17.996	17.138	12.948	15.415	13.234	16.269		16.792	14.4665	0.861511	-0.215058
ENSMUSG00000022247	Brix1	BRX1, biogenesis of ribosomes [Source:MGI Symbol;Acc:MGI:1915082]	1407.54	1439.43	1425.76	-0.577618	0.149246	-3.87023	0.000108732	0.00196592	TRUE	FALSE		15.915	18.601	15.669	15.031	12.679	9.991	13.895		16.7283	12.899	0.771087	-0.375034
ENSMUSG00000040463	Mybbp1a	MYB binding protein (P160) 1a [Source:MGI Symbol;Acc:MGI:106181]	1418.85	1436.09	1428.7	-0.493077	0.145695	-3.3843	0.000713601	0.00801705	TRUE	FALSE		15.793	16.892	17.384	13.787	15.754	17.452	13.254		16.6897	15.0617	0.90246	-0.148066
ENSMUSG00000025465	Echs1	enoyl Coenzyme A hydratase, short chain, 1, mitochondrial [Source:MGI Symbol;Acc:MGI:2136460]	1315.77	1445.77	1390.05	-0.537324	0.149833	-3.58615	0.0003356	0.00474653	TRUE	FALSE		16.293	16.777	16.556	14.45	11.907	11.476	15.987		16.542	13.455	0.813384	-0.297991
ENSMUSG00000025451	Paip1	polyadenylate binding protein-interacting protein 1 [Source:MGI Symbol;Acc:MGI:2384993]	3594.9	3898.36	3768.31	-0.565593	0.135904	-4.16171	3.15874e-05	0.000743461	TRUE	FALSE		16.131	17.205	15.499	12.46	13.656	12.523	14.17		16.2783	13.2022	0.811032	-0.302169
ENSMUSG00000022114	Spry2	sprouty homolog 2 (Drosophila) [Source:MGI Symbol;Acc:MGI:1345138]	582.03	566.725	573.284	-0.779796	0.18773	-4.15382	3.2697e-05	0.00076188	TRUE	FALSE		12.384	19.189	16.936	10.751	9.334	10.841	13.961		16.1697	11.2218	0.694	-0.526992
ENSMUSG00000027804	Ppid	peptidylprolyl isomerase D (cyclophilin D) [Source:MGI Symbol;Acc:MGI:1914988]	1537.85	1617.38	1583.3	-0.494237	0.143657	-3.44039	0.000580885	0.00692351	TRUE	FALSE		15.38	15.487	17.045	14.529	13.977	14.169	12.773		15.9707	13.862	0.867966	-0.204289
ENSMUSG00000059743	Fdps	farnesyl diphosphate synthetase [Source:MGI Symbol;Acc:MGI:104888]	1094.69	1055.26	1072.16	-0.499951	0.14691	-3.4031	0.00066626	0.00761488	TRUE	FALSE		17.11	14.598	14.763	14.57	12.599	17.577	12.142		15.4903	14.222	0.918121	-0.123244
ENSMUSG00000071533	Pcnp	PEST proteolytic signal containing nuclear protein [Source:MGI Symbol;Acc:MGI:1923552]	2643.15	2726.87	2690.99	-0.553563	0.132882	-4.16583	3.10219e-05	0.000732927	TRUE	FALSE		14.254	16.187	15.368	13.018	12.666	11.811	12.381		15.2697	12.469	0.816586	-0.292323
ENSMUSG00000042396	Rbm7	RNA binding motif protein 7 [Source:MGI Symbol;Acc:MGI:1914260]	724.687	805.865	771.074	-0.578221	0.156853	-3.68637	0.000227472	0.00353358	TRUE	FALSE		13.514	15.916	16.355	12.734	11.648	9.303	13.475		15.2617	11.79	0.772524	-0.372349
ENSMUSG00000015733	Capza2	capping protein (actin filament) muscle Z-line, alpha 2 [Source:MGI Symbol;Acc:MGI:106222]	3490.62	3729.05	3626.86	-0.526828	0.131032	-4.02061	5.80476e-05	0.00119963	TRUE	FALSE		14.521	15.823	14.878	13.158	12.329	10.615	13.058		15.074	12.29	0.815311	-0.294577
ENSMUSG00000041459	Tardbp	TAR DNA binding protein [Source:MGI Symbol;Acc:MGI:2387629]	1826.16	1737.51	1775.51	-0.497243	0.139981	-3.55221	0.000382009	0.00520923	TRUE	FALSE		14.925	16.776	13.412	13.488	12.949	13.409	12.299		15.0377	13.0362	0.866906	-0.206052
ENSMUSG00000044155	Lsm8	LSM8 homolog, U6 small nuclear RNA associated (S. cerevisiae) [Source:MGI Symbol;Acc:MGI:1923772]	828.968	828.269	828.569	-0.557921	0.15906	-3.50761	0.000452152	0.00579681	TRUE	FALSE		12.331	16.271	15.805	12.487	11.721	11.468	12.314		14.8023	11.9975	0.810514	-0.303091
ENSMUSG00000020917	Acly	ATP citrate lyase [Source:MGI Symbol;Acc:MGI:103251]	5866.92	6032.12	5961.32	-0.563617	0.127931	-4.40564	1.05471e-05	0.000302474	TRUE	FALSE		14.011	15.039	14.429	11.421	12.517	13.357	11.695		14.493	12.2475	0.845063	-0.242869
ENSMUSG00000017615	Tnfaip1	tumor necrosis factor, alpha-induced protein 1 (endothelial) [Source:MGI Symbol;Acc:MGI:104961]	1530	1536.23	1533.56	-0.561581	0.14823	-3.78856	0.000151521	0.00257474	TRUE	FALSE		13.459	14.69	14.561	11.761	13.247	13.443	9.952		14.2367	12.1007	0.849971	-0.234515
ENSMUSG00000027752	Exosc8	exosome component 8 [Source:MGI Symbol;Acc:MGI:1916889]	639.938	700.626	674.617	-0.809283	0.161409	-5.01388	5.33433e-07	2.45524e-05	TRUE	FALSE		11.911	15.186	15.172	9.606	9.347	7.789	10.461		14.0897	9.30075	0.660111	-0.599219
ENSMUSG00000021242	Npc2	Niemann-Pick type C2 [Source:MGI Symbol;Acc:MGI:1915213]	2001.47	2120.86	2069.69	-0.502104	0.135699	-3.70013	0.00021549	0.00338128	TRUE	FALSE		12.831	14.464	14.605	11.83	12.364	11.488	11.834		13.9667	11.879	0.850525	-0.233574
ENSMUSG00000003813	Rad23a	RAD23a homolog (S. cerevisiae) [Source:MGI Symbol;Acc:MGI:105126]	731.456	726.793	728.792	-0.599839	0.161572	-3.71251	0.000205213	0.00325287	TRUE	FALSE		12.995	14.352	14.453	11.377	11.977	12.927	9.686		13.9333	11.4917	0.824767	-0.277942
ENSMUSG00000027286	Lrrc57	leucine rich repeat containing 57 [Source:MGI Symbol;Acc:MGI:1913856]	518.861	582.031	554.958	-0.574834	0.168787	-3.40567	0.000660026	0.00757141	TRUE	FALSE		13.378	13.834	13.679	11.133	10.154	9.232	12.572		13.6303	10.7727	0.790351	-0.339434
ENSMUSG00000028691	Prdx1	peroxiredoxin 1 [Source:MGI Symbol;Acc:MGI:99523]	1519	1578.47	1552.98	-0.629225	0.157232	-4.00188	6.28413e-05	0.00127885	TRUE	FALSE		11.125	14.972	14.663	11.645	9.43	7.695	11.428		13.5867	10.0495	0.739659	-0.435068
ENSMUSG00000000184	Ccnd2	cyclin D2 [Source:MGI Symbol;Acc:MGI:88314]	2495.75	2321.1	2395.95	-1.07705	0.166583	-6.46553	1.00941e-10	1.24613e-08	TRUE	FALSE		10.438	16.411	13.503	9.024	7.997	5.579	6.267		13.4507	7.21675	0.536535	-0.898256
ENSMUSG00000020409	Slu7	SLU7 splicing factor homolog (S. cerevisiae) [Source:MGI Symbol;Acc:MGI:2385598]	1468.68	1552.98	1516.85	-0.584945	0.14981	-3.90457	9.43917e-05	0.00176132	TRUE	FALSE		13.242	13.438	13.581	10.168	12.504	12.618	9.71		13.4203	11.25	0.83828	-0.254496
ENSMUSG00000028180	Zranb2	zinc finger, RAN-binding domain containing 2 [Source:MGI Symbol;Acc:MGI:1858211]	1346.73	1515.27	1443.04	-0.639954	0.143889	-4.44756	8.68528e-06	0.000259044	TRUE	FALSE		13.175	12.795	14.205	11.264	8.822	9.022	11.666		13.3917	10.1935	0.761182	-0.393686
ENSMUSG00000032480	Dhx30	DEAH (Asp-Glu-Ala-His) box polypeptide 30 [Source:MGI Symbol;Acc:MGI:1920081]	3680.59	3660.13	3668.9	-0.45021	0.12952	-3.47598	0.000508986	0.00626271	TRUE	FALSE		13.415	13.842	12.82	12.674	11.74	12.25	11.324		13.359	11.997	0.898046	-0.155138
ENSMUSG00000034022	Cpsf1	cleavage and polyadenylation specific factor 1 [Source:MGI Symbol;Acc:MGI:2679722]	1200.79	1262.86	1236.26	-0.603115	0.147341	-4.09333	4.25222e-05	0.000939166	TRUE	FALSE		13.592	12.989	13.271	10.135	10.049	12.758	11.369		13.284	11.0777	0.833917	-0.262025
ENSMUSG00000036975	Tmem177	transmembrane protein 177 [Source:MGI Symbol;Acc:MGI:1913593]	479.829	545.287	517.233	-0.708687	0.167938	-4.21993	2.44377e-05	0.000607391	TRUE	FALSE		14.586	11.321	13.497	11.679	8.422	8.893	9.259		13.1347	9.56325	0.728092	-0.457807
ENSMUSG00000026563	Tada1	transcriptional adaptor 1 [Source:MGI Symbol;Acc:MGI:1196415]	1538.3	1542.72	1540.82	-0.474544	0.139722	-3.39635	0.000682918	0.00776637	TRUE	FALSE		12.719	14.298	12.18	11.269	12.598	11.486	10.466		13.0657	11.4548	0.876706	-0.189835
ENSMUSG00000052310	Slc39a1	solute carrier family 39 (zinc transporter), member 1 [Source:MGI Symbol;Acc:MGI:1353474]	467.512	514.073	494.119	-0.919367	0.17887	-5.13985	2.74952e-07	1.3815e-05	TRUE	FALSE		11.388	14.372	13.264	7.253	7.639	7.503	10.214		13.008	8.15225	0.62671	-0.674129
ENSMUSG00000003234	Abcf3	ATP-binding cassette, sub-family F (GCN20), member 3 [Source:MGI Symbol;Acc:MGI:1351656]	1370.29	1273.56	1315.02	-0.535362	0.150336	-3.5611	0.000369302	0.00509937	TRUE	FALSE		12.435	14.03	12.333	12.632	9.946	10.949	10.075		12.9327	10.9005	0.842866	-0.246625
ENSMUSG00000006288	Ttc5	tetratricopeptide repeat domain 5 [Source:MGI Symbol;Acc:MGI:2683584]	2021.96	2093.9	2063.07	-0.464738	0.137716	-3.37461	0.000739213	0.00821196	TRUE	FALSE		11.846	13.583	13.036	12.037	11.415	9.599	10.753		12.8217	10.951	0.854101	-0.227521
ENSMUSG00000020706	Ftsj3	FtsJ RNA methyltransferase homolog 3 (E. coli) [Source:MGI Symbol;Acc:MGI:1860295]	689.63	720.63	707.344	-0.555965	0.165497	-3.35937	0.000781204	0.0085611	TRUE	FALSE		11.716	14.443	12.124	8.304	12.379	11.645	10.81		12.761	10.7845	0.845114	-0.242782
ENSMUSG00000019303	Psmc3ip	proteasome (prosome, macropain) 26S subunit, ATPase 3, interacting protein [Source:MGI Symbol;Acc:MGI:1098610]	336.123	352.188	345.303	-0.662269	0.194051	-3.41287	0.000642825	0.00743357	TRUE	FALSE		13.063	13.404	11.745	10.671	8.212	8.219	10.878		12.7373	9.495	0.745446	-0.423823
ENSMUSG00000005481	Ddx39	DEAD (Asp-Glu-Ala-Asp) box polypeptide 39 [Source:MGI Symbol;Acc:MGI:1915528]	1151.48	1154.12	1152.99	-0.567069	0.157806	-3.59346	0.000326311	0.0046292	TRUE	FALSE		11.607	14.545	11.927	10.385	9.562	9.044	11.511		12.693	10.1255	0.797723	-0.32604
ENSMUSG00000029333	Rasgef1b	RasGEF domain family, member 1B [Source:MGI Symbol;Acc:MGI:2443755]	3160.13	3480.26	3343.06	-0.697964	0.159172	-4.38497	1.16002e-05	0.000329132	TRUE	FALSE		11.646	15.495	10.553	6.694	12.569	7.766	9.569		12.5647	9.1495	0.728193	-0.457608
ENSMUSG00000037149	Ddx1	DEAD (Asp-Glu-Ala-Asp) box polypeptide 1 [Source:MGI Symbol;Acc:MGI:2144727]	2990.43	3006.06	2999.36	-0.543921	0.134167	-4.05407	5.03341e-05	0.00107288	TRUE	FALSE		11.679	12.961	12.95	10.55	11	11.643	9.645		12.53	10.7095	0.854709	-0.226495
ENSMUSG00000025982	Sf3b1	splicing factor 3b, subunit 1 [Source:MGI Symbol;Acc:MGI:1932339]	4274.39	4301.9	4290.11	-0.4714	0.128502	-3.66843	0.000244041	0.00371057	TRUE	FALSE		11.46	13.508	12.414	10.633	11.249	11.238	10.88		12.4607	11	0.882778	-0.179878
ENSMUSG00000020899	Pfas	phosphoribosylformylglycinamidine synthase (FGAR amidotransferase) [Source:MGI Symbol;Acc:MGI:2684864]	2179.07	2139.27	2156.33	-0.601988	0.14752	-4.08074	4.4893e-05	0.000983277	TRUE	FALSE		10.757	13.33	12.848	10.92	8.919	9.127	9.824		12.3117	9.6975	0.787668	-0.344341
ENSMUSG00000090125	Pou3f1	POU domain, class 3, transcription factor 1 [Source:MGI Symbol;Acc:MGI:101896]	344.89	377.198	363.352	-0.72422	0.20711	-3.49678	0.000470912	0.00595944	TRUE	FALSE		11.57	12.344	12.568	5.653	10.602	13.18	9.392		12.1607	9.70675	0.798209	-0.325162
ENSMUSG00000027170	Eif3m	eukaryotic translation initiation factor 3, subunit M [Source:MGI Symbol;Acc:MGI:1351744]	1581.5	1769.84	1689.12	-0.4631	0.137812	-3.36037	0.000778382	0.00854524	TRUE	FALSE		11.825	12.194	12.457	10.934	10.43	8.676	11.226		12.1587	10.3165	0.848489	-0.237031
ENSMUSG00000011114	Tbrg1	transforming growth factor beta regulated gene 1 [Source:MGI Symbol;Acc:MGI:1100877]	757.163	766.427	762.457	-0.569039	0.167186	-3.40364	0.000664949	0.00760916	TRUE	FALSE		10.475	13.162	12.696	10.573	8.492	8.673	10.974		12.111	9.678	0.799108	-0.323537
ENSMUSG00000039367	Sec24c	Sec24 related gene family, member C (S. cerevisiae) [Source:MGI Symbol;Acc:MGI:1919746]	1888.09	1997.88	1950.82	-0.562329	0.139291	-4.03708	5.41199e-05	0.00113227	TRUE	FALSE		11.734	12.992	11.537	9.215	10.562	9.769	10.112		12.0877	9.9145	0.820216	-0.285924
ENSMUSG00000028409	Smu1	smu-1 suppressor of mec-8 and unc-52 homolog (C. elegans) [Source:MGI Symbol;Acc:MGI:1915546]	1942.09	2067.04	2013.49	-0.523564	0.135877	-3.85321	0.000116579	0.00207957	TRUE	FALSE		10.375	13.424	12.311	9.676	10.799	8.305	10.269		12.0367	9.76225	0.811043	-0.30215
ENSMUSG00000021039	Snw1	SNW domain containing 1 [Source:MGI Symbol;Acc:MGI:1913604]	2140.68	2166.37	2155.36	-0.473461	0.136311	-3.47338	0.000513938	0.00630699	TRUE	FALSE		12.053	12.422	11.368	11.236	9.921	10.017	10.393		11.9477	10.3918	0.869772	-0.20129
ENSMUSG00000031683	Lsm6	LSM6 homolog, U6 small nuclear RNA associated (S. cerevisiae) [Source:MGI Symbol;Acc:MGI:1925901]	1442.47	1601.38	1533.28	-0.565262	0.151327	-3.73537	0.000187439	0.00302515	TRUE	FALSE		11.918	11.046	12.849	9.789	10.553	10.475	8.869		11.9377	9.9215	0.831109	-0.266891
ENSMUSG00000026728	Vim	vimentin [Source:MGI Symbol;Acc:MGI:98932]	671.794	694.828	684.956	-1.23605	0.193985	-6.37186	1.86748e-10	2.16912e-08	TRUE	FALSE		9.24	11.973	14.488	6.591	6.113	7.237	4.62		11.9003	6.14025	0.515973	-0.954633
ENSMUSG00000024271	Elp2	elongator acetyltransferase complex subunit 2 [Source:MGI Symbol;Acc:MGI:1889642]	3315.27	3296.92	3304.79	-0.530801	0.130884	-4.05551	5.00261e-05	0.0010697	TRUE	FALSE		12.038	12.002	11.189	10.158	10.058	11.37	9.283		11.743	10.2172	0.870072	-0.200794
ENSMUSG00000032216	Nedd4	neural precursor cell expressed, developmentally down-regulated 4 [Source:MGI Symbol;Acc:MGI:97297]	7891.72	7988.49	7947.02	-0.605802	0.146451	-4.13654	3.52576e-05	0.00080841	TRUE	FALSE		10.278	10.97	13.186	9.554	9.553	11.41	7.93		11.478	9.61175	0.837406	-0.256
ENSMUSG00000031696	Vps35	vacuolar protein sorting 35 [Source:MGI Symbol;Acc:MGI:1890467]	3185.38	3561.7	3400.42	-0.483808	0.131946	-3.66673	0.000245674	0.00372933	TRUE	FALSE		11.36	10.596	10.787	9.791	9.593	8.257	9.314		10.9143	9.23875	0.846479	-0.240454
ENSMUSG00000022536	Glyr1	glyoxylate reductase 1 homolog (Arabidopsis) [Source:MGI Symbol;Acc:MGI:1921272]	3067.52	3155.88	3118.01	-0.471358	0.132683	-3.55251	0.000381568	0.00520703	TRUE	FALSE		10.762	11.406	9.87	9.225	10.15	9.209	8.796		10.6793	9.345	0.875055	-0.192555
ENSMUSG00000027247	Arhgap1	Rho GTPase activating protein 1 [Source:MGI Symbol;Acc:MGI:2445003]	1974.09	2014.54	1997.21	-0.482193	0.144586	-3.33499	0.000853025	0.00912177	TRUE	FALSE		11.775	9.906	10.338	9.135	9.478	12.321	8.757		10.673	9.92275	0.929706	-0.105154
ENSMUSG00000019818	Cd164	CD164 antigen [Source:MGI Symbol;Acc:MGI:1859568]	885.398	892.82	889.639	-0.782403	0.150631	-5.19416	2.0565e-07	1.07683e-05	TRUE	FALSE		8.981	12.475	9.965	6.512	8.509	6.891	7.067		10.4737	7.24475	0.691711	-0.531759
ENSMUSG00000025351	Cd63	CD63 antigen [Source:MGI Symbol;Acc:MGI:99529]	270.119	280.544	276.076	-0.957591	0.221973	-4.314	1.60326e-05	0.000430638	TRUE	FALSE		6.266	11.433	13.538	5.774	6.735	6.335	5.622		10.4123	6.1165	0.587428	-0.767515
ENSMUSG00000007041	Clic1	chloride intracellular channel 1 [Source:MGI Symbol;Acc:MGI:2148924]	616.332	694.996	661.283	-0.770857	0.174803	-4.40986	1.03436e-05	0.000298939	TRUE	FALSE		9.46	10.207	11.437	7.669	8.337	6.442	6.121		10.368	7.14225	0.688874	-0.537687
ENSMUSG00000002741	Ykt6	YKT6 v-SNARE homolog (S. cerevisiae) [Source:MGI Symbol;Acc:MGI:1927550]	868.852	934.629	906.438	-0.838647	0.160669	-5.21973	1.7918e-07	9.51596e-06	TRUE	FALSE		9.722	11.097	10.224	6.144	6.593	7.421	8.241		10.3477	7.09975	0.686121	-0.543465
ENSMUSG00000038533	Cbfa2t2	core-binding factor, runt domain, alpha subunit 2, translocated to, 2 (human) [Source:MGI Symbol;Acc:MGI:1333833]	8453.7	8145.69	8277.69	-0.518654	0.134032	-3.86963	0.000109	0.00196887	TRUE	FALSE		8.802	12.694	9.209	8.093	9.181	7.431	8.717		10.235	8.3555	0.816365	-0.292713
ENSMUSG00000022241	Tars	threonyl-tRNA synthetase [Source:MGI Symbol;Acc:MGI:106314]	1283.8	1342.51	1317.35	-0.484485	0.145016	-3.34092	0.000835021	0.00899734	TRUE	FALSE		9.327	10.314	10.893	8.769	9.245	9.169	8.417		10.178	8.9	0.874435	-0.193577
ENSMUSG00000044807	Zfp354c	zinc finger protein 354C [Source:MGI Symbol;Acc:MGI:1353621]	1401.38	1363.95	1379.99	-0.474121	0.143015	-3.31519	0.000915816	0.00956936	TRUE	FALSE		10.237	10.609	9.679	9.756	9.265	9.365	7.725		10.175	9.02775	0.887248	-0.17259
ENSMUSG00000022814	Umps	uridine monophosphate synthetase [Source:MGI Symbol;Acc:MGI:1298388]	935.595	885.394	906.909	-0.782067	0.153137	-5.10697	3.27367e-07	1.60591e-05	TRUE	FALSE		8.891	11.652	9.623	7.21	7.705	7.389	6.156		10.0553	7.115	0.707585	-0.499025
ENSMUSG00000040433	Zbtb38	zinc finger and BTB domain containing 38 [Source:MGI Symbol;Acc:MGI:2442866]	5249.96	5327.54	5294.3	-0.648341	0.127464	-5.08644	3.64839e-07	1.75282e-05	TRUE	FALSE		9.239	10.771	9.463	7.293	8.306	7.923	7.215		9.82433	7.68425	0.782165	-0.354455
ENSMUSG00000027411	Vps16	vacuolar protein sorting 16 (yeast) [Source:MGI Symbol;Acc:MGI:2136772]	1493.63	1581.05	1543.59	-0.5409	0.142987	-3.78286	0.000155039	0.00262496	TRUE	FALSE		9.052	9.716	10.622	8.438	8.236	8.205	7.82		9.79667	8.17475	0.834442	-0.261116
ENSMUSG00000000787	Ddx3x	DEAD/H (Asp-Glu-Ala-Asp/His) box polypeptide 3, X-linked [Source:MGI Symbol;Acc:MGI:103064]	996.501	1062.45	1034.18	-0.507836	0.153591	-3.30643	0.000944941	0.00975358	TRUE	FALSE		8.066	10.2	11.046	7.156	9.559	9.295	8.046		9.77067	8.514	0.871384	-0.19862
ENSMUSG00000058355	Abce1	ATP-binding cassette, sub-family E (OABP), member 1 [Source:MGI Symbol;Acc:MGI:1195458]	2133.48	2174.31	2156.81	-0.525411	0.140137	-3.74928	0.000177342	0.00291263	TRUE	FALSE		9.556	10.219	9.001	8.201	7.679	7.946	8.477		9.592	8.07575	0.841926	-0.248235
ENSMUSG00000006498	Ptbp1	polypyrimidine tract binding protein 1 [Source:MGI Symbol;Acc:MGI:97791]	706.081	740.231	725.595	-0.772166	0.166938	-4.62546	3.73762e-06	0.000129504	TRUE	FALSE		7.724	9.858	10.718	5.961	7.677	7.821	5.961		9.43333	6.855	0.726678	-0.460611
ENSMUSG00000032127	Vps11	vacuolar protein sorting 11 (yeast) [Source:MGI Symbol;Acc:MGI:1918982]	1020.27	1015.17	1017.36	-0.558558	0.148293	-3.76658	0.000165498	0.00276685	TRUE	FALSE		9.338	9.997	8.935	7.775	8.413	8.586	6.994		9.42333	7.942	0.842802	-0.246735
ENSMUSG00000028837	Psmb2	proteasome (prosome, macropain) subunit, beta type 2 [Source:MGI Symbol;Acc:MGI:1347045]	2360.62	2472.39	2424.49	-0.467903	0.135546	-3.45199	0.000556466	0.00669627	TRUE	FALSE		8.635	9.738	9.875	8.674	8.19	7.412	8.117		9.416	8.09825	0.860052	-0.217504
ENSMUSG00000024165	Hn1l	hematological and neurological expressed 1-like [Source:MGI Symbol;Acc:MGI:1196260]	1325.8	1235.69	1274.31	-0.820237	0.146076	-5.61513	1.96414e-08	1.41365e-06	TRUE	FALSE		9.104	10.202	8.802	7.16	6.33	7.559	5.622		9.36933	6.66775	0.711657	-0.490746
ENSMUSG00000031505	Carkd	carbohydrate kinase domain containing [Source:MGI Symbol;Acc:MGI:1913353]	1226.61	1349.17	1296.65	-0.481144	0.144969	-3.31894	0.000903591	0.00947881	TRUE	FALSE		9.348	8.719	9.813	8.758	7.9	7.387	7.752		9.29333	7.94925	0.855371	-0.225377
ENSMUSG00000033970	Rfc3	replication factor C (activator 1) 3 [Source:MGI Symbol;Acc:MGI:1916513]	550.73	595.39	576.25	-0.718017	0.16998	-4.22411	2.39885e-05	0.000600228	TRUE	FALSE		7.534	9.688	10.531	6.93	6.589	5.789	6.894		9.251	6.5505	0.708086	-0.498004
ENSMUSG00000020664	Dld	dihydrolipoamide dehydrogenase [Source:MGI Symbol;Acc:MGI:107450]	1384.96	1483.22	1441.11	-0.477405	0.14168	-3.36961	0.000752742	0.00834237	TRUE	FALSE		8.353	9.545	9.431	8.138	8.221	6.672	7.718		9.10967	7.68725	0.843856	-0.244931
ENSMUSG00000074656	Eif2s2	eukaryotic translation initiation factor 2, subunit 2 (beta) [Source:MGI Symbol;Acc:MGI:1914454]	1442.8	1585.87	1524.56	-0.547026	0.142421	-3.8409	0.000122582	0.00216183	TRUE	FALSE		8.43	9.558	9.333	7.422	7.175	6.313	8.395		9.107	7.32625	0.804464	-0.313901
ENSMUSG00000063445	Nmral1	NmrA-like family domain containing 1 [Source:MGI Symbol;Acc:MGI:1915074]	571.96	661.708	623.245	-0.717894	0.167676	-4.28144	1.85689e-05	0.000487524	TRUE	FALSE		8.993	8.91	9.355	6.664	7.436	5.758	6.098		9.086	6.489	0.714176	-0.485649
ENSMUSG00000024048	Myl12a	myosin, light chain 12A, regulatory, non-sarcomeric [Source:MGI Symbol;Acc:MGI:1914518]	634.991	636.682	635.958	-0.586181	0.166471	-3.52121	0.000429579	0.00560377	TRUE	FALSE		7.513	10.318	9.193	7.483	7.208	5.963	7.274		9.008	6.982	0.775089	-0.367566
ENSMUSG00000017667	Zfp334	zinc finger protein 334 [Source:MGI Symbol;Acc:MGI:2388656]	1040.86	948.957	988.346	-0.538079	0.150406	-3.57751	0.00034688	0.0048618	TRUE	FALSE		7.922	11.882	7.212	6.946	9.044	6.575	6.504		9.00533	7.26725	0.806994	-0.30937
ENSMUSG00000017264	Exosc10	exosome component 10 [Source:MGI Symbol;Acc:MGI:1355322]	1671.43	1779.06	1732.93	-0.495889	0.142826	-3.47198	0.00051664	0.00633181	TRUE	FALSE		8.336	9.348	8.947	6.596	8.335	8.447	7.981		8.877	7.83975	0.883153	-0.179265
ENSMUSG00000024975	Pdcd4	programmed cell death 4 [Source:MGI Symbol;Acc:MGI:107490]	2466.56	2788.64	2650.6	-0.473987	0.133715	-3.54476	0.00039297	0.00530439	TRUE	FALSE		7.307	9.874	9.359	6.47	8.375	6.245	8.656		8.84667	7.4365	0.840599	-0.25051
ENSMUSG00000020808	Fam64a	family with sequence similarity 64, member A [Source:MGI Symbol;Acc:MGI:1924434]	274.112	242.137	255.841	-1.96665	0.234431	-8.38904	4.90128e-17	2.07647e-14	TRUE	FALSE		6.579	11.889	8.039	2.417	2.156	1.992	3.174		8.83567	2.43475	0.275559	-1.85957
ENSMUSG00000028693	Nasp	nuclear autoantigenic sperm protein (histone-binding) [Source:MGI Symbol;Acc:MGI:1355328]	1815.57	1855.98	1838.66	-0.62006	0.136722	-4.53518	5.75541e-06	0.000184977	TRUE	FALSE		7.528	9.412	9.341	6.288	7.013	7.804	7.283		8.76033	7.097	0.810129	-0.303776
ENSMUSG00000020929	Eftud2	elongation factor Tu GTP binding domain containing 2 [Source:MGI Symbol;Acc:MGI:1336880]	2956.56	3066.17	3019.19	-0.493126	0.134985	-3.6532	0.000258996	0.00388411	TRUE	FALSE		8.668	9.079	8.419	7.068	8.145	8.273	7.338		8.722	7.706	0.883513	-0.178677
ENSMUSG00000021116	Eif2s1	eukaryotic translation initiation factor 2, subunit 1 alpha [Source:MGI Symbol;Acc:MGI:95299]	1634.42	1676.47	1658.45	-0.632924	0.149121	-4.24436	2.19219e-05	0.000558261	TRUE	FALSE		7.662	9.305	9.003	7.11	5.919	6.113	7.451		8.65667	6.64825	0.767992	-0.380837
ENSMUSG00000027428	Rbbp9	retinoblastoma binding protein 9 [Source:MGI Symbol;Acc:MGI:1347074]	536.157	601.611	573.559	-0.587893	0.168098	-3.49732	0.000469955	0.00595138	TRUE	FALSE		8.775	8.411	8.653	6.905	6.245	6.491	7.876		8.613	6.87925	0.798705	-0.324265
ENSMUSG00000054309	Cpsf3	cleavage and polyadenylation specificity factor 3 [Source:MGI Symbol;Acc:MGI:1859328]	1992.03	2029.51	2013.45	-0.462759	0.137399	-3.368	0.000757147	0.00837625	TRUE	FALSE		7.959	8.797	8.571	6.797	7.863	8.801	7.54		8.44233	7.75025	0.918022	-0.123399
ENSMUSG00000020492	Ska2	spindle and kinetochore associated complex subunit 2 [Source:MGI Symbol;Acc:MGI:1913390]	1026.77	1015.01	1020.05	-0.525534	0.148633	-3.53578	0.000406569	0.0054096	TRUE	FALSE		8.157	9.69	7.459	7.364	7.502	6.055	6.629		8.43533	6.8875	0.816506	-0.292465
ENSMUSG00000022210	Dhrs4	dehydrogenase/reductase (SDR family) member 4 [Source:MGI Symbol;Acc:MGI:90169]	581.161	658.703	625.471	-1.23458	0.167229	-7.38254	1.55294e-13	3.48774e-11	TRUE	FALSE		6.981	9.616	8.625	3.187	5.001	3.789	4.779		8.40733	4.189	0.498255	-1.00504
ENSMUSG00000022673	Mcm4	minichromosome maintenance deficient 4 homolog (S. cerevisiae) [Source:MGI Symbol;Acc:MGI:103199]	737.738	780.094	761.941	-1.05673	0.159664	-6.61846	3.62948e-11	5.14999e-09	TRUE	FALSE		7.61	8.889	8.607	5.022	5.197	4.697	4.266		8.36867	4.7955	0.57303	-0.803317
ENSMUSG00000031403	Dkc1	dyskeratosis congenita 1, dyskerin [Source:MGI Symbol;Acc:MGI:1861727]	903.149	873.543	886.231	-0.641688	0.16847	-3.8089	0.000139585	0.00240481	TRUE	FALSE		6.395	9.244	9.295	6.497	6.974	6.785	5.548		8.31133	6.451	0.776169	-0.365557
ENSMUSG00000031765	Mt1	metallothionein 1 [Source:MGI Symbol;Acc:MGI:97171]	71.8351	55.7619	62.6504	-1.26801	0.328803	-3.85645	0.000115047	0.00205478	TRUE	FALSE		5.096	11.41	8.274	3.763	3.847	3.955	2.741		8.26	3.5765	0.43299	-1.20759
ENSMUSG00000048376	F2r	coagulation factor II (thrombin) receptor [Source:MGI Symbol;Acc:MGI:101802]	901.81	1077.39	1002.14	-0.858774	0.179279	-4.79016	1.66645e-06	6.48524e-05	TRUE	FALSE		7.952	8.198	8.504	3.738	6.68	6.67	5.9		8.218	5.747	0.699319	-0.515978
ENSMUSG00000048170	Mcmbp	MCM (minichromosome maintenance deficient) binding protein [Source:MGI Symbol;Acc:MGI:1920977]	2812.92	2933.14	2881.62	-0.474307	0.134276	-3.53233	0.000411912	0.00545434	TRUE	FALSE		7.254	9.007	8.244	6.872	7.091	6.336	7.599		8.16833	6.9745	0.853846	-0.227952
ENSMUSG00000062270	Morf4l1	mortality factor 4 like 1 [Source:MGI Symbol;Acc:MGI:1096551]	1431.06	1555.68	1502.27	-0.480345	0.140444	-3.42018	0.000625786	0.0072939	TRUE	FALSE		8.08	8.208	8.11	7.238	7.362	6.283	6.823		8.13267	6.9265	0.851689	-0.231602
ENSMUSG00000027589	Pcmtd2	protein-L-isoaspartate (D-aspartate) O-methyltransferase domain containing 2 [Source:MGI Symbol;Acc:MGI:1923927]	1112.32	1296.92	1217.8	-0.587779	0.146406	-4.01471	5.95189e-05	0.00122461	TRUE	FALSE		7.763	7.718	8.594	6.044	6.567	6.065	6.901		8.025	6.39425	0.796791	-0.327726
ENSMUSG00000041126	H2afv	H2A histone family, member V [Source:MGI Symbol;Acc:MGI:1924855]	860.871	1015.75	949.374	-1.01416	0.194453	-5.21542	1.83398e-07	9.68848e-06	TRUE	FALSE		8.06	8.737	7.251	3.277	4.834	4.792	6.377		8.016	4.82	0.601297	-0.733849
ENSMUSG00000054409	Tmem74	transmembrane protein 74 [Source:MGI Symbol;Acc:MGI:2443417]	173.043	206.635	192.238	-0.775769	0.223654	-3.46861	0.000523165	0.00639078	TRUE	FALSE		8.1	7.344	8.256	4.86	5.705	5.828	5.691		7.9	5.521	0.698861	-0.516923
ENSMUSG00000021578	Ccdc127	coiled-coil domain containing 127 [Source:MGI Symbol;Acc:MGI:1914683]	933.449	982.761	961.628	-0.500337	0.151073	-3.31189	0.000926668	0.00963952	TRUE	FALSE		7.505	8.032	8.085	7.504	6.508	5.631	6.54		7.874	6.54575	0.831312	-0.266538
ENSMUSG00000030978	Rrm1	ribonucleotide reductase M1 [Source:MGI Symbol;Acc:MGI:98180]	1529.2	1427.03	1470.82	-1.10099	0.154579	-7.12249	1.05995e-12	2.01618e-10	TRUE	FALSE		6.263	9.201	7.976	4.558	4.481	4.671	3.902		7.81333	4.403	0.563524	-0.827451
ENSMUSG00000029729	Zkscan1	zinc finger with KRAB and SCAN domains 1 [Source:MGI Symbol;Acc:MGI:1921820]	1427.13	1439.5	1434.2	-0.46679	0.140424	-3.32414	0.000886906	0.00937077	TRUE	FALSE		8.409	7.262	7.41	7.587	6.156	7.519	6.517		7.69367	6.94475	0.902658	-0.147749
ENSMUSG00000029387	Gtf2h3	general transcription factor IIH, polypeptide 3 [Source:MGI Symbol;Acc:MGI:1277143]	1071.15	1118.91	1098.44	-0.611382	0.154633	-3.95376	7.69335e-05	0.00150122	TRUE	FALSE		8.098	7.494	7.475	7.072	6.524	5.768	4.898		7.689	6.0655	0.788854	-0.342169
ENSMUSG00000022033	Pbk	PDZ binding kinase [Source:MGI Symbol;Acc:MGI:1289156]	496.154	416.593	450.69	-2.7413	0.201856	-13.5804	5.23201e-42	1.6255e-38	TRUE	FALSE		4.737	10.441	7.775	1.127	1.254	1.275	1.3		7.651	1.239	0.16194	-2.62647
ENSMUSG00000029017	Pmpcb	peptidase (mitochondrial processing) beta [Source:MGI Symbol;Acc:MGI:1920328]	1158.23	1252.12	1211.88	-0.509798	0.143392	-3.55527	0.000377595	0.00516986	TRUE	FALSE		7.282	7.802	7.785	6.41	6.549	6.046	6.648		7.623	6.41325	0.841303	-0.249303
ENSMUSG00000023505	Cdca3	cell division cycle associated 3 [Source:MGI Symbol;Acc:MGI:1315198]	209.887	176.413	190.759	-1.43082	0.242961	-5.8891	3.88305e-09	3.39831e-07	TRUE	FALSE		5.11	10.017	7.708	3.467	3.182	3.118	2.773		7.61167	3.135	0.411868	-1.27975
ENSMUSG00000041431	Ccnb1	cyclin B1 [Source:MGI Symbol;Acc:MGI:88302]	366.657	249.981	299.985	-2.50147	0.265384	-9.42582	4.26747e-21	3.05961e-18	TRUE	FALSE		5	11.838	5.949	1.458	1.009	1.018	1.797		7.59567	1.3205	0.173849	-2.52409
ENSMUSG00000025747	Tyms	thymidylate synthase [Source:MGI Symbol;Acc:MGI:98878]	808.448	763.504	782.766	-1.04287	0.175921	-5.92806	3.06528e-09	2.74711e-07	TRUE	FALSE		5.704	9.229	7.806	4.477	3.985	3.924	4.674		7.57967	4.265	0.56269	-0.829589
ENSMUSG00000030934	Oat	ornithine aminotransferase [Source:MGI Symbol;Acc:MGI:97394]	1028.92	956.508	987.542	-0.972776	0.162356	-5.99163	2.07747e-09	1.92667e-07	TRUE	FALSE		6.424	8.796	7.45	5.185	4.613	4.56	4.047		7.55667	4.60125	0.608899	-0.715724
ENSMUSG00000057561	Eif1a	eukaryotic translation initiation factor 1A [Source:MGI Symbol;Acc:MGI:95298]	723.037	762.795	745.756	-0.546179	0.161546	-3.38094	0.000722377	0.00807788	TRUE	FALSE		7.408	8.07	6.984	5.487	6.866	6.539	6.26		7.48733	6.288	0.839818	-0.251851
ENSMUSG00000028902	Sf3a3	splicing factor 3a, subunit 3 [Source:MGI Symbol;Acc:MGI:1922312]	1116.84	1066.5	1088.07	-0.495383	0.150252	-3.29701	0.000977188	0.00995475	TRUE	FALSE		7.582	8.001	6.783	6.303	7.373	7.947	5.416		7.45533	6.75975	0.9067	-0.141303
ENSMUSG00000030061	Uba3	ubiquitin-like modifier activating enzyme 3 [Source:MGI Symbol;Acc:MGI:1341217]	1217.45	1353.29	1295.07	-0.476964	0.1425	-3.3471	0.000816604	0.00887599	TRUE	FALSE		6.8	7.711	7.845	6.574	6.521	5.038	6.691		7.452	6.206	0.832797	-0.263964
ENSMUSG00000039130	Zc3hc1	zinc finger, C3HC type 1 [Source:MGI Symbol;Acc:MGI:1916023]	1495.38	1490.92	1492.83	-0.484174	0.141693	-3.41706	0.000633023	0.00734298	TRUE	FALSE		7.621	7.932	6.755	6.403	6.918	6.971	5.993		7.436	6.57125	0.883708	-0.178359
ENSMUSG00000020074	Ccar1	cell division cycle and apoptosis regulator 1 [Source:MGI Symbol;Acc:MGI:1914750]	2811.64	2736.49	2768.7	-0.618311	0.133103	-4.64536	3.39486e-06	0.000118731	TRUE	FALSE		7.039	8.139	6.957	6.132	6.251	5.936	5.143		7.37833	5.8655	0.794963	-0.331041
ENSMUSG00000048109	Rbm15	RNA binding motif protein 15 [Source:MGI Symbol;Acc:MGI:2443205]	485.13	466.482	474.474	-0.594231	0.177656	-3.34483	0.000823324	0.00892821	TRUE	FALSE		6.734	8.714	6.602	5.254	6.027	6.324	6.214		7.35	5.95475	0.81017	-0.303703
ENSMUSG00000040374	Pex2	peroxisomal biogenesis factor 2 [Source:MGI Symbol;Acc:MGI:107486]	903.819	870.946	885.034	-0.63408	0.192185	-3.29932	0.0009692	0.00991594	TRUE	FALSE		5.488	8.69	7.824	6.197	4.313	4.469	6.994		7.334	5.49325	0.749011	-0.41694
ENSMUSG00000025626	Phf6	PHD finger protein 6 [Source:MGI Symbol;Acc:MGI:1918248]	2502.05	2640.86	2581.37	-0.551968	0.133681	-4.129	3.64346e-05	0.000828266	TRUE	FALSE		7.254	7.437	7.235	6.047	6.303	6.149	5.834		7.30867	6.08325	0.832334	-0.264766
ENSMUSG00000029094	Afap1	actin filament associated protein 1 [Source:MGI Symbol;Acc:MGI:1917542]	6262.64	6378.11	6328.62	-0.61165	0.135184	-4.52456	6.05214e-06	0.000191541	TRUE	FALSE		6.466	8.489	6.843	4.59	7.052	6.422	5.714		7.266	5.9445	0.818126	-0.289606
ENSMUSG00000055612	Cdca7	cell division cycle associated 7 [Source:MGI Symbol;Acc:MGI:1914203]	475.182	424.515	446.23	-1.8152	0.186501	-9.73292	2.18229e-22	1.93715e-19	TRUE	FALSE		4.992	9.074	7.666	2.096	2.658	3.256	2.041		7.244	2.51275	0.346873	-1.52752
ENSMUSG00000021266	Wars	tryptophanyl-tRNA synthetase [Source:MGI Symbol;Acc:MGI:104630]	2087.2	2012.6	2044.57	-0.478782	0.135398	-3.53611	0.00040606	0.0054096	TRUE	FALSE		7.063	7.321	7.311	6.547	5.994	7.817	6.232		7.23167	6.6475	0.919221	-0.121516
ENSMUSG00000041879	Ipo9	importin 9 [Source:MGI Symbol;Acc:MGI:1918944]	2665.18	2911.07	2805.69	-0.460973	0.137575	-3.35071	0.00080605	0.00878688	TRUE	FALSE		6.969	7.257	7.226	5.856	6.098	6.302	7.092		7.15067	6.337	0.886211	-0.174278
ENSMUSG00000027671	Actl6a	actin-like 6A [Source:MGI Symbol;Acc:MGI:1861453]	1081.09	1135.45	1112.15	-0.643627	0.145924	-4.4107	1.03039e-05	0.000298252	TRUE	FALSE		6.481	7.78	7.119	5.594	5.773	4.687	5.353		7.12667	5.35175	0.750947	-0.413217
ENSMUSG00000003410	Elavl3	ELAV (embryonic lethal, abnormal vision, Drosophila)-like 3 (Hu antigen C) [Source:MGI Symbol;Acc:MGI:109157]	2088.64	2030.91	2055.65	-0.567433	0.154165	-3.68069	0.000232606	0.00358645	TRUE	FALSE		8.375	7.663	5.037	5.653	6.294	6.398	4.918		7.025	5.81575	0.827865	-0.272533
ENSMUSG00000029250	Polr2b	polymerase (RNA) II (DNA directed) polypeptide B [Source:MGI Symbol;Acc:MGI:2388280]	2160.13	2140.61	2148.98	-0.576987	0.135959	-4.24383	2.19741e-05	0.000558825	TRUE	FALSE		6.942	7.344	6.728	6.276	5.716	5.712	5.172		7.00467	5.719	0.816456	-0.292553
ENSMUSG00000034160	Ogt	O-linked N-acetylglucosamine (GlcNAc) transferase (UDP-N-acetylglucosamine:polypeptide-N-acetylglucosaminyl transferase) [Source:MGI Symbol;Acc:MGI:1339639]	2510.62	2556.38	2536.77	-0.472469	0.133469	-3.53991	0.000400257	0.00536391	TRUE	FALSE		7.099	7.096	6.812	6.249	6.274	6.669	5.85		7.00233	6.2605	0.894059	-0.161558
ENSMUSG00000021364	Elovl2	elongation of very long chain fatty acids (FEN1/Elo2, SUR4/Elo3, yeast)-like 2 [Source:MGI Symbol;Acc:MGI:1858960]	2264.39	2117.55	2180.48	-0.493706	0.135627	-3.64018	0.00027245	0.00401798	TRUE	FALSE		6.436	8.172	6.346	5.504	7.114	7.163	5.35		6.98467	6.28275	0.899506	-0.152795
ENSMUSG00000020739	Nup85	nucleoporin 85 [Source:MGI Symbol;Acc:MGI:3046173]	1032.45	1095.98	1068.75	-0.497172	0.147339	-3.37434	0.000739919	0.00821491	TRUE	FALSE		6.474	7.273	6.883	5.893	5.798	5.269	6.204		6.87667	5.791	0.842123	-0.247897
ENSMUSG00000042520	Ubap2l	ubiquitin-associated protein 2-like [Source:MGI Symbol;Acc:MGI:1921633]	2846.64	2883.21	2867.53	-0.546429	0.137801	-3.96535	7.32872e-05	0.00143956	TRUE	FALSE		6.603	7.285	6.444	5.162	6.6	6.522	5.112		6.77733	5.849	0.863024	-0.212528
ENSMUSG00000033732	Sf3b3	splicing factor 3b, subunit 3 [Source:MGI Symbol;Acc:MGI:1289341]	1927.71	1922.87	1924.94	-0.568958	0.13682	-4.15845	3.20419e-05	0.000751723	TRUE	FALSE		6.658	6.938	6.48	5.726	5.696	5.984	4.976		6.692	5.5955	0.836148	-0.25817
ENSMUSG00000070436	Serpinh1	serine (or cysteine) peptidase inhibitor, clade H, member 1 [Source:MGI Symbol;Acc:MGI:88283]	401.537	377.736	387.937	-0.852491	0.188122	-4.53158	5.85442e-06	0.000186551	TRUE	FALSE		4.85	7.145	8.034	3.854	4.487	6.745	4.137		6.67633	4.80575	0.719819	-0.474294
ENSMUSG00000003660	Snrnp200	small nuclear ribonucleoprotein 200 (U5) [Source:MGI Symbol;Acc:MGI:2444401]	1613.58	1687.7	1655.94	-0.648058	0.152583	-4.24725	2.16412e-05	0.000553381	TRUE	FALSE		6.741	6.916	6.325	4.987	6.37	5.652	4.156		6.66067	5.29125	0.794402	-0.332058
ENSMUSG00000027811	4930579G24Rik	RIKEN cDNA 4930579G24 gene [Source:MGI Symbol;Acc:MGI:1923189]	166.658	182.95	175.968	-0.814356	0.229882	-3.5425	0.00039636	0.00533687	TRUE	FALSE		6.25	7.664	6.055	4.411	4.525	2.973	5.193		6.65633	4.2755	0.642321	-0.638635
ENSMUSG00000060427	Zfp868	zinc finger protein 868 [Source:MGI Symbol;Acc:MGI:2142546]	771.699	759.038	764.464	-0.587081	0.167447	-3.50607	0.000454777	0.00581548	TRUE	FALSE		6.554	7.215	6.193	5.555	4.622	5.565	5.966		6.654	5.427	0.8156	-0.294067
ENSMUSG00000054256	Msi1	musashi RNA-binding protein 1 [Source:MGI Symbol;Acc:MGI:107376]	1324.22	1396.68	1365.63	-0.573582	0.145204	-3.95018	7.80915e-05	0.00152111	TRUE	FALSE		6.056	7.419	6.482	4.65	6.161	5.479	5.496		6.65233	5.4465	0.818735	-0.288531
ENSMUSG00000062070	Pgk1	phosphoglycerate kinase 1 [Source:MGI Symbol;Acc:MGI:97555]	881.248	872.951	876.507	-0.52009	0.157344	-3.30542	0.000948335	0.00976141	TRUE	FALSE		6.128	7.581	6.218	5.405	5.5	5.448	5.974		6.64233	5.58175	0.84033	-0.250973
ENSMUSG00000033105	Lss	lanosterol synthase [Source:MGI Symbol;Acc:MGI:1336155]	1397.66	1333.53	1361.02	-0.513717	0.142142	-3.61411	0.00030138	0.00435505	TRUE	FALSE		6.318	7.136	6.325	5.854	5.616	6.228	5.278		6.593	5.744	0.871227	-0.198879
ENSMUSG00000027206	Cops2	COP9 signalosome subunit 2 [Source:MGI Symbol;Acc:MGI:1330276]	1536.66	1527.03	1531.16	-0.459906	0.13937	-3.2999	0.000967187	0.00990622	TRUE	FALSE		6.176	7.043	6.271	5.707	5.936	5.942	5.562		6.49667	5.78675	0.890726	-0.166946
ENSMUSG00000005682	Pan2	PAN2 polyA specific ribonuclease subunit homolog (S. cerevisiae) [Source:MGI Symbol;Acc:MGI:1918984]	829.466	923.009	882.919	-0.624412	0.156921	-3.97916	6.91598e-05	0.00137589	TRUE	FALSE		5.946	7.064	6.438	4.794	4.918	3.967	5.865		6.48267	4.886	0.753702	-0.407934
ENSMUSG00000001774	Chordc1	cysteine and histidine-rich domain (CHORD)-containing, zinc-binding protein 1 [Source:MGI Symbol;Acc:MGI:1914167]	1040.51	1164.65	1111.45	-0.500872	0.146957	-3.40829	0.000653711	0.00753142	TRUE	FALSE		5.923	6.357	6.913	5.136	5.141	5.291	6.298		6.39767	5.4665	0.854452	-0.226928
ENSMUSG00000058799	Nap1l1	nucleosome assembly protein 1-like 1 [Source:MGI Symbol;Acc:MGI:1855693]	1154.23	1278.73	1225.37	-0.631939	0.146561	-4.31179	1.61939e-05	0.000434347	TRUE	FALSE		6.266	6.286	6.566	4.702	5.176	5.177	5.052		6.37267	5.02675	0.788799	-0.342271
ENSMUSG00000029427	Zcchc8	zinc finger, CCHC domain containing 8 [Source:MGI Symbol;Acc:MGI:1917900]	1142.91	1126.17	1133.35	-0.568999	0.163298	-3.48442	0.000493204	0.0061374	TRUE	FALSE		5.554	7.2	6.244	4.986	4.47	5.198	6.131		6.33267	5.19625	0.820547	-0.285342
ENSMUSG00000022789	Dnm1l	dynamin 1-like [Source:MGI Symbol;Acc:MGI:1921256]	2343.87	2423.88	2389.59	-0.493049	0.138473	-3.56062	0.000369978	0.00510493	TRUE	FALSE		6.239	6.352	6.213	5.318	5.971	5.983	4.919		6.268	5.54775	0.885091	-0.176102
ENSMUSG00000031826	Usp10	ubiquitin specific peptidase 10 [Source:MGI Symbol;Acc:MGI:894652]	2305.51	2510.54	2422.67	-0.474243	0.139857	-3.39092	0.000696588	0.00786499	TRUE	FALSE		6.594	5.92	6.289	5.241	5.412	6.144	5.719		6.26767	5.629	0.898101	-0.15505
ENSMUSG00000020914	Top2a	topoisomerase (DNA) II alpha [Source:MGI Symbol;Acc:MGI:98790]	1100.99	952.162	1015.94	-2.30688	0.175971	-13.1094	2.909e-39	6.77833e-36	TRUE	FALSE		4.443	8.446	5.888	1.349	1.4	1.287	1.569		6.259	1.40125	0.223878	-2.15922
ENSMUSG00000042650	Alkbh5	alkB homolog 5, RNA demethylase [Source:MGI Symbol;Acc:MGI:2144489]	1016.52	1089.21	1058.06	-0.688959	0.159058	-4.33148	1.48108e-05	0.000403547	TRUE	FALSE		5.216	7.307	6.232	3.308	5.5	5.058	5.348		6.25167	4.8035	0.768355	-0.380155
ENSMUSG00000031246	Sh3bgrl	SH3-binding domain glutamic acid-rich protein like [Source:MGI Symbol;Acc:MGI:1930849]	4755.2	5055.39	4926.74	-0.526701	0.12932	-4.07283	4.64448e-05	0.00101024	TRUE	FALSE		5.648	6.734	6.018	5.004	5.28	4.341	5.366		6.13333	4.99775	0.814851	-0.295393
ENSMUSG00000063884	Ptcd3	pentatricopeptide repeat domain 3 [Source:MGI Symbol;Acc:MGI:1917206]	1271.64	1310.64	1293.93	-0.550293	0.152015	-3.62	0.000294602	0.00428703	TRUE	FALSE		5.905	6.563	5.484	5.566	4.523	3.569	5.134		5.984	4.698	0.785094	-0.349063
ENSMUSG00000027433	Xrn2	5'-3' exoribonuclease 2 [Source:MGI Symbol;Acc:MGI:894687]	3048.05	3167.46	3116.28	-0.480063	0.133759	-3.589	0.000331944	0.00470195	TRUE	FALSE		6.021	5.991	5.656	5.1	5.49	5.424	4.806		5.88933	5.205	0.883801	-0.178206
ENSMUSG00000030605	Mfge8	milk fat globule-EGF factor 8 protein [Source:MGI Symbol;Acc:MGI:102768]	510.03	431.069	464.91	-1.93885	0.380701	-5.09284	3.5274e-07	1.69908e-05	TRUE	FALSE		2.945	7.575	7.081	1.373	1.356	1.678	0.857		5.867	1.316	0.224305	-2.15646
ENSMUSG00000040204	2810417H13Rik	RIKEN cDNA 2810417H13 gene [Source:MGI Symbol;Acc:MGI:1915276]	391.712	422.422	409.26	-1.98588	0.182919	-10.8566	1.85546e-27	2.88231e-24	TRUE	FALSE		4.119	6.72	6.47	1.416	1.89	1.482	1.734		5.76967	1.6305	0.282599	-1.82317
ENSMUSG00000038252	Ncapd2	non-SMC condensin I complex, subunit D2 [Source:MGI Symbol;Acc:MGI:1915548]	951.234	1019.1	990.015	-0.797477	0.151075	-5.27869	1.30113e-07	7.21856e-06	TRUE	FALSE		5.236	6.086	5.8	3.596	3.917	4.131	4.385		5.70733	4.00725	0.702123	-0.510204
ENSMUSG00000041133	Smc1a	structural maintenance of chromosomes 1A [Source:MGI Symbol;Acc:MGI:1344345]	2227.66	2107.98	2159.27	-0.536974	0.144064	-3.72732	0.000193523	0.00310721	TRUE	FALSE		5.25	6.222	5.58	4.488	5.77	6.207	3.915		5.684	5.095	0.896376	-0.157824
ENSMUSG00000026662	Sephs1	selenophosphate synthetase 1 [Source:MGI Symbol;Acc:MGI:1923580]	1319.88	1330.43	1325.91	-0.483076	0.144573	-3.34141	0.000833545	0.00899717	TRUE	FALSE		5.107	6.112	5.752	4.89	5.373	4.936	4.487		5.657	4.9215	0.869984	-0.200939
ENSMUSG00000029911	Ssbp1	single-stranded DNA binding protein 1 [Source:MGI Symbol;Acc:MGI:1920040]	495.312	588.343	548.473	-0.724017	0.166342	-4.35259	1.34539e-05	0.000373761	TRUE	FALSE		5.204	5.463	6.244	4.26	3.662	3.122	4.721		5.637	3.94125	0.699175	-0.516274
ENSMUSG00000005410	Mcm5	minichromosome maintenance deficient 5, cell division cycle 46 (S. cerevisiae) [Source:MGI Symbol;Acc:MGI:103197]	647.617	600.654	620.781	-1.62306	0.186335	-8.71043	3.02727e-18	1.52517e-15	TRUE	FALSE		4.083	7.035	5.766	2.269	2.449	1.868	1.672		5.628	2.0645	0.366827	-1.44683
ENSMUSG00000025474	Tubgcp2	tubulin, gamma complex associated protein 2 [Source:MGI Symbol;Acc:MGI:1921487]	1864.92	1834.46	1847.51	-0.459996	0.139135	-3.30611	0.000946006	0.00975358	TRUE	FALSE		5.348	5.841	5.645	5.411	4.814	5.037	4.686		5.61133	4.987	0.888737	-0.170171
ENSMUSG00000028423	Nfx1	nuclear transcription factor, X-box binding 1 [Source:MGI Symbol;Acc:MGI:1921414]	2347.63	2414.76	2385.99	-0.572435	0.155167	-3.68915	0.000225005	0.00349854	TRUE	FALSE		5.051	6.296	5.451	4.548	3.922	3.891	5.453		5.59933	4.4535	0.795363	-0.330315
ENSMUSG00000052962	Mrpl35	mitochondrial ribosomal protein L35 [Source:MGI Symbol;Acc:MGI:1913473]	583.962	608.133	597.774	-0.583329	0.164088	-3.55498	0.000378012	0.00516986	TRUE	FALSE		5.224	5.346	5.89	4.832	4.063	4.548	4.397		5.48667	4.46	0.81288	-0.298886
ENSMUSG00000029767	Calu	calumenin [Source:MGI Symbol;Acc:MGI:1097158]	1243.72	1233.3	1237.77	-0.599823	0.150312	-3.99053	6.59248e-05	0.00132855	TRUE	FALSE		4.706	6.009	5.677	4.329	4.918	4.566	3.811		5.464	4.406	0.806369	-0.310488
ENSMUSG00000022881	Rfc4	replication factor C (activator 1) 4 [Source:MGI Symbol;Acc:MGI:2146571]	504.396	521.202	513.999	-0.96131	0.187579	-5.12483	2.97805e-07	1.48037e-05	TRUE	FALSE		4.454	5.988	5.924	3.698	2.716	2.764	3.832		5.45533	3.2525	0.596206	-0.746118
ENSMUSG00000066551	Hmgb1	high mobility group box 1 [Source:MGI Symbol;Acc:MGI:96113]	5588.54	6011.3	5830.12	-0.588594	0.127565	-4.61409	3.9483e-06	0.000135794	TRUE	FALSE		5.24	5.597	5.516	4.37	4.609	4.185	4.282		5.451	4.3615	0.800128	-0.321697
ENSMUSG00000028698	Pik3r3	phosphatidylinositol 3 kinase, regulatory subunit, polypeptide 3 (p55) [Source:MGI Symbol;Acc:MGI:109277]	3415.61	3672.35	3562.32	-0.497154	0.141259	-3.51945	0.000432437	0.00563064	TRUE	FALSE		5.79	5.634	4.902	4.388	4.941	4.658	4.732		5.442	4.67975	0.859932	-0.217705
ENSMUSG00000038943	Prc1	protein regulator of cytokinesis 1 [Source:MGI Symbol;Acc:MGI:1858961]	719.901	556.067	626.282	-2.15713	0.192596	-11.2003	4.0634e-29	6.88598e-26	TRUE	FALSE		3.782	7.884	4.61	1.321	1.387	1.188	1.377		5.42533	1.31825	0.24298	-2.04109
ENSMUSG00000041360	Pum3	pumilio RNA-binding family member 3 [Source:MGI Symbol;Acc:MGI:106253]	1827.45	1823.81	1825.37	-0.455167	0.13721	-3.3173	0.000908932	0.00950808	TRUE	FALSE		5.122	5.765	5.36	4.805	4.776	5.056	4.807		5.41567	4.861	0.897581	-0.155886
ENSMUSG00000028134	Ptbp2	polypyrimidine tract binding protein 2 [Source:MGI Symbol;Acc:MGI:1860489]	2832.34	2965.03	2908.16	-0.456615	0.137236	-3.32722	0.000877178	0.00931708	TRUE	FALSE		5.468	5.505	5.199	4.67	5.356	5.004	4.327		5.39067	4.83925	0.897709	-0.15568
ENSMUSG00000031328	Flna	filamin, alpha [Source:MGI Symbol;Acc:MGI:95556]	960.664	1052.81	1013.32	-0.805855	0.156769	-5.14038	2.74177e-07	1.38133e-05	TRUE	FALSE		4.835	5.809	5.508	3.751	3.319	2.902	4.31		5.384	3.5705	0.663169	-0.592552
ENSMUSG00000003779	Kif20a	kinesin family member 20A [Source:MGI Symbol;Acc:MGI:1201682]	257.604	217.799	234.858	-2.43055	0.258958	-9.38589	6.2386e-21	4.15335e-18	TRUE	FALSE		3.645	7.237	5.198	0.99	0.704	1.117	1.438		5.36	1.06225	0.198181	-2.33511
ENSMUSG00000028184	Adgrl2	adhesion G protein-coupled receptor L2 [Source:MGI Symbol;Acc:MGI:2139714]	7652.33	7314.51	7459.29	-0.530649	0.132622	-4.00122	6.30165e-05	0.00127962	TRUE	FALSE		4.88	5.794	5.371	4.897	4.32	4.65	4.279		5.34833	4.5365	0.848208	-0.23751
ENSMUSG00000050410	Tcf19	transcription factor 19 [Source:MGI Symbol;Acc:MGI:103180]	123.443	139.106	132.393	-1.39763	0.254617	-5.48915	4.03883e-08	2.64168e-06	TRUE	FALSE		4.936	5.646	5.258	1.834	2.813	2.54	1.988		5.28	2.29375	0.434422	-1.20283
ENSMUSG00000064326	Siva1	SIVA1, apoptosis-inducing factor [Source:MGI Symbol;Acc:MGI:1353606]	150.294	141.302	145.155	-1.14546	0.276045	-4.14954	3.33149e-05	0.000771458	TRUE	FALSE		3.572	5.609	6.454	3.365	2.463	2.883	1.933		5.21167	2.661	0.510585	-0.969776
ENSMUSG00000028884	Rpa2	replication protein A2 [Source:MGI Symbol;Acc:MGI:1339939]	317.94	337	328.832	-1.36346	0.203842	-6.68881	2.24996e-11	3.27667e-09	TRUE	FALSE		3.933	5.808	5.788	2.62	2.218	1.689	2.384		5.17633	2.22775	0.430372	-1.21634
ENSMUSG00000024530	Slmo1	slowmo homolog 1 (Drosophila) [Source:MGI Symbol;Acc:MGI:2442865]	645.368	611.765	626.166	-0.681371	0.170288	-4.00128	6.30003e-05	0.00127962	TRUE	FALSE		4.985	5.398	5.097	4.224	4.286	4.77	3.015		5.16	4.07375	0.789486	-0.341014
ENSMUSG00000026753	Ppp6c	protein phosphatase 6, catalytic subunit [Source:MGI Symbol;Acc:MGI:1915107]	1243.32	1410.89	1339.07	-0.490279	0.148191	-3.30843	0.0009382	0.0097204	TRUE	FALSE		5.081	4.968	5.407	3.968	4.539	4.695	4.856		5.152	4.5145	0.876262	-0.190566
ENSMUSG00000041859	Mcm3	minichromosome maintenance deficient 3 (S. cerevisiae) [Source:MGI Symbol;Acc:MGI:101845]	495.613	391.274	435.991	-2.27644	0.381891	-5.96096	2.50762e-09	2.28022e-07	TRUE	FALSE		2.89	7.095	5.323	1.038	1.047	0.775	0.482		5.10267	0.8355	0.163738	-2.61054
ENSMUSG00000031245	Hmgn5	high-mobility group nucleosome binding domain 5 [Source:MGI Symbol;Acc:MGI:1355295]	290.407	337.883	317.536	-0.879878	0.20502	-4.29168	1.7733e-05	0.00046888	TRUE	FALSE		4.329	5.993	4.924	2.266	3.785	2.659	4.176		5.082	3.2215	0.633904	-0.657664
ENSMUSG00000038650	Rnh1	ribonuclease/angiogenin inhibitor 1 [Source:MGI Symbol;Acc:MGI:1195456]	526.487	487.93	504.454	-0.597416	0.171409	-3.48533	0.000491529	0.00612063	TRUE	FALSE		4.272	5.649	5.304	3.869	3.865	5.182	4.148		5.075	4.266	0.840591	-0.250524
ENSMUSG00000030406	Gipr	gastric inhibitory polypeptide receptor [Source:MGI Symbol;Acc:MGI:1352753]	369.557	382.845	377.15	-0.819283	0.190775	-4.2945	1.75086e-05	0.00046556	TRUE	FALSE		5.049	5.088	4.937	2.891	3.118	4.796	3.972		5.02467	3.69425	0.735223	-0.443746
ENSMUSG00000037730	Mynn	myoneurin [Source:MGI Symbol;Acc:MGI:1931415]	650.673	718.618	689.499	-0.586704	0.157305	-3.72973	0.000191683	0.00308563	TRUE	FALSE		4.743	4.895	5.345	4.018	3.93	3.884	4.16		4.99433	3.998	0.800507	-0.321014
ENSMUSG00000017428	Psmd11	proteasome (prosome, macropain) 26S subunit, non-ATPase, 11 [Source:MGI Symbol;Acc:MGI:1916327]	1805.87	1767.25	1783.8	-0.507343	0.138509	-3.66288	0.000249391	0.00377653	TRUE	FALSE		4.549	5.535	4.764	4.033	4.349	4.556	4.251		4.94933	4.29725	0.868248	-0.20382
ENSMUSG00000039533	Mmd2	monocyte to macrophage differentiation-associated 2 [Source:MGI Symbol;Acc:MGI:1922354]	1742.52	1915.17	1841.18	-0.478685	0.143268	-3.34119	0.000834193	0.00899734	TRUE	FALSE		5.369	4.952	4.515	4.319	4.699	3.9	3.998		4.94533	4.229	0.85515	-0.225751
ENSMUSG00000002718	Cse1l	chromosome segregation 1-like (S. cerevisiae) [Source:MGI Symbol;Acc:MGI:1339951]	1569.6	1605.57	1590.15	-0.522083	0.140233	-3.72296	0.000196902	0.0031506	TRUE	FALSE		4.585	5.154	4.988	4.012	4.014	4.471	4.406		4.909	4.22575	0.860817	-0.216222
ENSMUSG00000019773	Fbxo5	F-box protein 5 [Source:MGI Symbol;Acc:MGI:1914391]	174.595	155.286	163.561	-2.21237	0.259992	-8.50938	1.74871e-17	7.95068e-15	TRUE	FALSE		3.537	7.051	4.111	0.839	1.314	0.455	1.648		4.89967	1.064	0.217158	-2.20319
ENSMUSG00000020897	Aurkb	aurora kinase B [Source:MGI Symbol;Acc:MGI:107168]	216.392	133.968	169.292	-1.56885	0.291811	-5.37625	7.60515e-08	4.47427e-06	TRUE	FALSE		2.481	7.791	4.4	2.119	1.454	1.686	1.502		4.89067	1.69025	0.345607	-1.53279
ENSMUSG00000039449	Prpf18	PRP18 pre-mRNA processing factor 18 homolog (yeast) [Source:MGI Symbol;Acc:MGI:1914479]	1198.97	1188.03	1192.72	-0.479595	0.144096	-3.3283	0.000873788	0.00929166	TRUE	FALSE		4.806	5.079	4.665	4.238	4.272	4.737	4.103		4.85	4.3375	0.89433	-0.161121
ENSMUSG00000058013	2016-09-11	septin 11 [Source:MGI Symbol;Acc:MGI:1277214]	3309.99	3208.93	3252.24	-0.45734	0.135421	-3.37718	0.000732327	0.00816954	TRUE	FALSE		4.602	5.099	4.747	4.795	4.257	4.16	3.823		4.816	4.25875	0.884292	-0.177405
ENSMUSG00000029432	Gbas	glioblastoma amplified sequence [Source:MGI Symbol;Acc:MGI:1278343]	1092.72	1237.42	1175.41	-0.754886	0.152577	-4.94757	7.51451e-07	3.29595e-05	TRUE	FALSE		4.358	4.412	5.629	3.558	3.328	3.531	3.334		4.79967	3.43775	0.716248	-0.48147
ENSMUSG00000019977	Hbs1l	Hbs1-like (S. cerevisiae) [Source:MGI Symbol;Acc:MGI:1891704]	2828.39	2806.93	2816.13	-0.470429	0.137192	-3.42899	0.000605827	0.00712956	TRUE	FALSE		4.645	5.348	4.266	3.973	4.347	4.211	4.17		4.753	4.17525	0.878445	-0.186976
ENSMUSG00000021840	Mapk1ip1l	mitogen-activated protein kinase 1 interacting protein 1-like [Source:MGI Symbol;Acc:MGI:2444022]	908.09	904.848	906.238	-0.674638	0.150275	-4.48937	7.14354e-06	0.00021974	TRUE	FALSE		4.399	5.205	4.623	3.375	3.916	4.08	3.412		4.74233	3.69575	0.77931	-0.35973
ENSMUSG00000022962	Gart	phosphoribosylglycinamide formyltransferase [Source:MGI Symbol;Acc:MGI:95654]	967.792	987.37	978.979	-0.507197	0.150448	-3.37125	0.000748288	0.00830288	TRUE	FALSE		4.283	5.179	4.6	3.493	4.414	4.421	4.05		4.68733	4.0945	0.873524	-0.19508
ENSMUSG00000031799	Tpm4	tropomyosin 4 [Source:MGI Symbol;Acc:MGI:2449202]	598.776	568.009	581.195	-1.0773	0.176686	-6.09726	1.07903e-09	1.04219e-07	TRUE	FALSE		3.875	4.943	5.156	2.791	2.56	3.619	2.288		4.658	2.8145	0.604229	-0.726832
ENSMUSG00000033706	Smyd5	SET and MYND domain containing 5 [Source:MGI Symbol;Acc:MGI:108048]	518.087	538.622	529.821	-0.560408	0.169655	-3.30321	0.000955834	0.00982232	TRUE	FALSE		4.695	4.72	4.525	3.873	4.174	3.993	3.362		4.64667	3.8505	0.828659	-0.27115
ENSMUSG00000028955	Vamp3	vesicle-associated membrane protein 3 [Source:MGI Symbol;Acc:MGI:1321389]	327.123	379.032	356.785	-0.805958	0.186435	-4.32301	1.53918e-05	0.000417032	TRUE	FALSE		3.746	4.847	5.324	2.617	3.621	3.026	3.283		4.639	3.13675	0.676169	-0.564543
ENSMUSG00000048562	Sp8	trans-acting transcription factor 8 [Source:MGI Symbol;Acc:MGI:2443471]	161.703	190.951	178.416	-1.26078	0.227624	-5.53886	3.04443e-08	2.0562e-06	TRUE	FALSE		3.3	5.146	5.384	2.089	2.404	1.271	2.53		4.61	2.0735	0.449783	-1.1527
ENSMUSG00000029838	Ptn	pleiotrophin [Source:MGI Symbol;Acc:MGI:97804]	2720.71	2970.69	2863.56	-1.37626	0.149288	-9.21884	3.00326e-20	1.64929e-17	TRUE	FALSE		3.859	4.334	5.629	1.815	2.28	3.654	1.998		4.60733	2.43675	0.528885	-0.918974
ENSMUSG00000049739	Zfp646	zinc finger protein 646 [Source:MGI Symbol;Acc:MGI:3665412]	328.135	348.795	339.941	-0.726348	0.20387	-3.56279	0.000366929	0.0050779	TRUE	FALSE		4.934	4.304	4.566	3.407	3.96	4.101	2.426		4.60133	3.4735	0.75489	-0.405662
ENSMUSG00000026019	Wdr12	WD repeat domain 12 [Source:MGI Symbol;Acc:MGI:1927241]	975.433	1075.46	1032.59	-0.544068	0.148293	-3.66888	0.000243616	0.00371057	TRUE	FALSE		4.272	4.384	5.047	3.992	3.358	3.515	4.14		4.56767	3.75125	0.821262	-0.284086
ENSMUSG00000022750	Klhl22	kelch-like 22 [Source:MGI Symbol;Acc:MGI:1337995]	1241.2	1217.98	1227.93	-0.51554	0.144592	-3.56549	0.000363183	0.00503727	TRUE	FALSE		4.296	5.065	4.317	3.941	3.921	3.822	3.76		4.55933	3.861	0.846834	-0.239848
ENSMUSG00000032116	Stt3a	STT3, subunit of the oligosaccharyltransferase complex, homolog A (S. cerevisiae) [Source:MGI Symbol;Acc:MGI:105124]	1437.37	1347.51	1386.02	-0.567402	0.153486	-3.69678	0.000218355	0.00341472	TRUE	FALSE		4.031	4.968	4.65	3.999	4.071	4.179	3.046		4.54967	3.82375	0.840446	-0.250773
ENSMUSG00000017716	Birc5	baculoviral IAP repeat-containing 5 [Source:MGI Symbol;Acc:MGI:1203517]	193.182	177.095	183.989	-1.25852	0.244107	-5.15562	2.5279e-07	1.2875e-05	TRUE	FALSE		2.804	5.705	5.005	1.987	1.831	2.146	2.54		4.50467	2.126	0.471955	-1.08328
ENSMUSG00000001403	Ube2c	ubiquitin-conjugating enzyme E2C [Source:MGI Symbol;Acc:MGI:1915862]	211.82	220.701	216.895	-1.92088	0.231479	-8.29832	1.05592e-16	4.27901e-14	TRUE	FALSE		3.432	5.392	4.605	1.429	1.183	0.753	1.645		4.47633	1.2525	0.279805	-1.83751
ENSMUSG00000004880	Lbr	lamin B receptor [Source:MGI Symbol;Acc:MGI:2138281]	904.265	851.851	874.314	-0.862773	0.163778	-5.26796	1.37951e-07	7.60811e-06	TRUE	FALSE		3.419	5.268	4.591	2.929	3.222	2.928	2.535		4.426	2.9035	0.65601	-0.60821
ENSMUSG00000066456	Hmgn3	high mobility group nucleosomal binding domain 3 [Source:MGI Symbol;Acc:MGI:2138069]	1121.99	1229.24	1183.27	-0.734629	0.157322	-4.66959	3.01803e-06	0.00010819	TRUE	FALSE		3.506	4.779	4.904	2.993	2.752	2.695	3.966		4.39633	3.1015	0.705474	-0.503335
ENSMUSG00000004099	Dnmt1	DNA methyltransferase (cytosine-5) 1 [Source:MGI Symbol;Acc:MGI:94912]	1812.65	1902.71	1864.11	-0.560487	0.144752	-3.87206	0.000107921	0.00195506	TRUE	FALSE		4.204	4.438	4.49	3.11	4.002	4.542	3.597		4.37733	3.81275	0.871021	-0.19922
ENSMUSG00000014956	Ppp1cb	protein phosphatase 1, catalytic subunit, beta isoform [Source:MGI Symbol;Acc:MGI:104871]	1962.71	2102.48	2042.58	-0.515692	0.138624	-3.72007	0.000199165	0.00317862	TRUE	FALSE		3.97	4.356	4.786	3.69	3.811	3.729	3.62		4.37067	3.7125	0.849413	-0.235462
ENSMUSG00000052798	Nup107	nucleoporin 107 [Source:MGI Symbol;Acc:MGI:2143854]	1452.07	1414.91	1430.83	-0.603159	0.144327	-4.17911	2.92652e-05	0.000697613	TRUE	FALSE		4.365	4.946	3.784	3.408	3.686	3.619	3.312		4.365	3.50625	0.803265	-0.316053
ENSMUSG00000032446	Eomes	eomesodermin [Source:MGI Symbol;Acc:MGI:1201683]	180.176	180.044	180.101	-2.12339	0.268119	-7.91959	2.38302e-15	7.93247e-13	TRUE	FALSE		2.876	4.833	5.273	1.345	0.78	1.188	0.941		4.32733	1.0635	0.245763	-2.02466
ENSMUSG00000042745	Id1	inhibitor of DNA binding 1 [Source:MGI Symbol;Acc:MGI:96396]	25.7195	28.2307	27.1545	-1.50504	0.413191	-3.64249	0.000270015	0.00399156	TRUE	FALSE		1.712	4.947	6.102	0.129	1.559	2.003	1.364		4.25367	1.26375	0.297097	-1.751
ENSMUSG00000036427	Gpi1	glucose phosphate isomerase 1 [Source:MGI Symbol;Acc:MGI:95797]	947.818	978.322	965.249	-0.55459	0.150133	-3.69399	0.000220763	0.00344949	TRUE	FALSE		4.215	4.445	3.977	3.413	3.574	3.56	3.442		4.21233	3.49725	0.830241	-0.268399
ENSMUSG00000028300	3110043O21Rik	RIKEN cDNA 3110043O21 gene [Source:MGI Symbol;Acc:MGI:1920455]	1020.57	1259.22	1156.94	-0.528265	0.157675	-3.35034	0.000807139	0.00879361	TRUE	FALSE		4.456	3.822	4.35	3.203	3.669	3.251	3.807		4.20933	3.4825	0.827328	-0.273468
ENSMUSG00000039231	Suv39h1	suppressor of variegation 3-9 homolog 1 (Drosophila) [Source:MGI Symbol;Acc:MGI:1099440]	431.498	435.622	433.855	-0.615591	0.17507	-3.51626	0.000437665	0.00567746	TRUE	FALSE		3.568	4.567	4.283	3.135	3.471	3.31	3.125		4.13933	3.26025	0.787627	-0.344416
ENSMUSG00000021760	Gpx8	glutathione peroxidase 8 (putative) [Source:MGI Symbol;Acc:MGI:1916840]	78.778	73.6679	75.858	-2.31174	0.322701	-7.1637	7.85264e-13	1.5248e-10	TRUE	FALSE		2.928	5.109	4.377	0.745	0.525	1.011	0.997		4.138	0.8195	0.198043	-2.33612
ENSMUSG00000030677	Kif22	kinesin family member 22 [Source:MGI Symbol;Acc:MGI:109233]	348.493	290.158	315.159	-2.40178	0.212387	-11.3085	1.19113e-29	2.22039e-26	TRUE	FALSE		2.961	5.782	3.669	0.58	0.935	1.028	1.027		4.13733	0.8925	0.215719	-2.21278
ENSMUSG00000020986	Sec23a	SEC23 homolog A, COPII coat complex component [Source:MGI Symbol;Acc:MGI:1349635]	1745.58	1798.61	1775.88	-0.550233	0.142965	-3.84872	0.000118735	0.00211197	TRUE	FALSE		4.019	3.992	4.352	3.446	3.575	4.076	3.133		4.121	3.5575	0.863261	-0.212131
ENSMUSG00000037892	Pcdh18	protocadherin 18 [Source:MGI Symbol;Acc:MGI:1920423]	346.627	396.034	374.859	-1.25325	0.187627	-6.67947	2.39804e-11	3.46526e-09	TRUE	FALSE		3.678	4.126	4.544	1.679	2.25	2.561	2.045		4.116	2.13375	0.518404	-0.947852
ENSMUSG00000068735	Trp53i11	transformation related protein 53 inducible protein 11 [Source:MGI Symbol;Acc:MGI:2670995]	433.377	470.066	454.342	-0.630132	0.177251	-3.55503	0.000377934	0.00516986	TRUE	FALSE		4.244	3.762	4.318	3.156	3.232	3.861	3.036		4.108	3.32125	0.808483	-0.30671
ENSMUSG00000030662	Ipo5	importin 5 [Source:MGI Symbol;Acc:MGI:1917822]	1097.2	1193.02	1151.96	-0.730768	0.156698	-4.66355	3.10803e-06	0.000110146	TRUE	FALSE		3.728	3.882	4.708	2.703	3.26	3.864	2.814		4.106	3.16025	0.769666	-0.377695
ENSMUSG00000033364	Usp37	ubiquitin specific peptidase 37 [Source:MGI Symbol;Acc:MGI:2442483]	3333.11	3590.85	3480.39	-0.520724	0.134798	-3.86301	0.000111999	0.00200942	TRUE	FALSE		3.896	4.41	3.922	3.344	3.419	2.88	3.703		4.076	3.3365	0.818572	-0.288819
ENSMUSG00000037461	Ints7	integrator complex subunit 7 [Source:MGI Symbol;Acc:MGI:1924315]	1585.13	1511.87	1543.26	-0.593567	0.144865	-4.09737	4.17866e-05	0.000925552	TRUE	FALSE		3.819	4.328	4.061	3.522	3.444	3.731	2.806		4.06933	3.37575	0.829558	-0.269584
ENSMUSG00000028800	Hdac1	histone deacetylase 1 [Source:MGI Symbol;Acc:MGI:108086]	800.017	807.748	804.435	-0.691513	0.155762	-4.43956	9.01443e-06	0.000266304	TRUE	FALSE		3.294	4.706	4.123	2.774	3.127	2.82	3.158		4.041	2.96975	0.734905	-0.444371
ENSMUSG00000027429	Sec23b	SEC23 homolog B, COPII coat complex component [Source:MGI Symbol;Acc:MGI:1350925]	1030.82	1072.89	1054.86	-0.668474	0.151294	-4.41838	9.94439e-06	0.000290554	TRUE	FALSE		3.697	4.334	4.089	3.103	3.46	2.91	2.709		4.04	3.0455	0.753837	-0.407676
ENSMUSG00000074476	Spc24	SPC24, NDC80 kinetochore complex component, homolog (S. cerevisiae) [Source:MGI Symbol;Acc:MGI:1914879]	126.1	120.534	122.919	-1.18248	0.278284	-4.2492	2.14537e-05	0.000550093	TRUE	FALSE		2.868	4.767	4.38	2.416	1.512	1.514	2.332		4.005	1.9435	0.485268	-1.04315
ENSMUSG00000002870	Mcm2	minichromosome maintenance deficient 2 mitotin (S. cerevisiae) [Source:MGI Symbol;Acc:MGI:105380]	353.01	391.573	375.046	-1.44463	0.18584	-7.77349	7.63547e-15	2.29569e-12	TRUE	FALSE		3.777	4.171	4.065	1.735	1.901	1.804	1.52		4.00433	1.74	0.434529	-1.20247
ENSMUSG00000029283	Cdc7	cell division cycle 7 (S. cerevisiae) [Source:MGI Symbol;Acc:MGI:1309511]	617.067	567.59	588.794	-0.707125	0.178513	-3.96119	7.45778e-05	0.00145877	TRUE	FALSE		3.501	4.913	3.588	3.446	2.851	2.133	2.752		4.00067	2.7955	0.698759	-0.517134
ENSMUSG00000004642	Slbp	stem-loop binding protein [Source:MGI Symbol;Acc:MGI:108402]	530.211	538.595	535.002	-0.570997	0.169772	-3.36332	0.000770123	0.00847994	TRUE	FALSE		3.628	4.265	3.813	3.235	2.995	2.961	3.371		3.902	3.1405	0.804844	-0.31322
ENSMUSG00000068523	Gng5	guanine nucleotide binding protein (G protein), gamma 5 [Source:MGI Symbol;Acc:MGI:109164]	146.405	169.866	159.811	-0.809953	0.230668	-3.51133	0.000445866	0.00573595	TRUE	FALSE		3.607	3.777	4.294	2.706	2.441	2.289	2.86		3.89267	2.574	0.661243	-0.596747
ENSMUSG00000000751	Rpa1	replication protein A1 [Source:MGI Symbol;Acc:MGI:1915525]	1419.65	1399.83	1408.32	-0.850109	0.14326	-5.93403	2.95585e-09	2.67475e-07	TRUE	FALSE		3.772	4.129	3.714	2.758	2.457	2.909	2.535		3.87167	2.66475	0.688269	-0.538955
ENSMUSG00000051396	Hspa14	heat shock protein 14 [Source:MGI Symbol;Acc:MGI:1354164]	707.107	687.627	695.975	-0.692426	0.161524	-4.28682	1.8125e-05	0.000477214	TRUE	FALSE		3.604	4.262	3.633	2.88	2.734	3.085	2.941		3.833	2.91	0.759196	-0.397455
ENSMUSG00000005233	Spc25	SPC25, NDC80 kinetochore complex component, homolog (S. cerevisiae) [Source:MGI Symbol;Acc:MGI:1913692]	267.471	219.03	239.79	-2.2235	0.263486	-8.43879	3.20648e-17	1.42314e-14	TRUE	FALSE		2.483	5.135	3.738	1.244	0.719	0.497	0.808		3.78533	0.817	0.215833	-2.21201
ENSMUSG00000035413	Tmem98	transmembrane protein 98 [Source:MGI Symbol;Acc:MGI:1923457]	318.612	316.415	317.357	-1.00661	0.208395	-4.83028	1.3634e-06	5.51669e-05	TRUE	FALSE		3.725	3.45	4.151	2.366	2.326	3.628	1.581		3.77533	2.47525	0.655637	-0.60903
ENSMUSG00000040167	Ikzf5	IKAROS family zinc finger 5 [Source:MGI Symbol;Acc:MGI:1914393]	620.876	669.276	648.533	-0.562577	0.159267	-3.53229	0.000411979	0.00545434	TRUE	FALSE		3.484	3.873	3.964	2.909	3.118	3.135	3.254		3.77367	3.104	0.822542	-0.281838
ENSMUSG00000030861	Acadsb	acyl-Coenzyme A dehydrogenase, short/branched chain [Source:MGI Symbol;Acc:MGI:1914135]	1059.17	1168.56	1121.68	-0.536777	0.148964	-3.6034	0.000314077	0.00449727	TRUE	FALSE		3.87	3.702	3.599	3.142	2.949	2.833	3.334		3.72367	3.0645	0.822979	-0.281072
ENSMUSG00000034263	Vwa9	von Willebrand factor A domain containing 9 [Source:MGI Symbol;Acc:MGI:1917132]	782.55	747.309	762.413	-0.579368	0.157252	-3.68433	0.000229308	0.00355124	TRUE	FALSE		3.792	3.747	3.543	3.495	2.881	3.333	2.601		3.694	3.0775	0.833108	-0.263425
ENSMUSG00000028873	Cdca8	cell division cycle associated 8 [Source:MGI Symbol;Acc:MGI:1196274]	477.22	416.201	442.352	-1.72823	0.185554	-9.3139	1.23217e-20	7.65629e-18	TRUE	FALSE		2.657	4.71	3.599	1.195	1.446	1.554	1.073		3.65533	1.317	0.360295	-1.47275
ENSMUSG00000033446	Lpar6	lysophosphatidic acid receptor 6 [Source:MGI Symbol;Acc:MGI:1914418]	130.974	142.505	137.563	-0.846333	0.253783	-3.33487	0.000853407	0.00912177	TRUE	FALSE		4.203	3.057	3.664	3.973	1.797	1.562	2.008		3.64133	2.335	0.641249	-0.641044
ENSMUSG00000028047	Thbs3	thrombospondin 3 [Source:MGI Symbol;Acc:MGI:98739]	318.636	306.541	311.724	-0.705602	0.213656	-3.30252	0.000958197	0.00983576	TRUE	FALSE		2.827	4.061	3.993	3.101	2.121	2.285	2.907		3.627	2.6035	0.717811	-0.478324
ENSMUSG00000025395	Prim1	DNA primase, p49 subunit [Source:MGI Symbol;Acc:MGI:97757]	345.475	378.606	364.407	-1.03298	0.182882	-5.64837	1.61978e-08	1.20777e-06	TRUE	FALSE		3.11	3.794	3.959	2.008	2.117	2.104	2.172		3.621	2.10025	0.580019	-0.785827
ENSMUSG00000030521	Mphosph10	M-phase phosphoprotein 10 (U3 small nucleolar ribonucleoprotein) [Source:MGI Symbol;Acc:MGI:1915223]	414.592	428.724	422.667	-0.693342	0.180394	-3.84349	0.000121296	0.00214727	TRUE	FALSE		3.508	3.726	3.594	3.088	2.344	2.352	2.784		3.60933	2.642	0.731991	-0.450102
ENSMUSG00000018648	Dusp14	dual specificity phosphatase 14 [Source:MGI Symbol;Acc:MGI:1927168]	540.917	612.062	581.571	-0.729023	0.187937	-3.87909	0.00010485	0.00191056	TRUE	FALSE		3.476	3.732	3.576	1.881	3.401	3.191	2.512		3.59467	2.74625	0.763979	-0.388395
ENSMUSG00000042211	Fbxo38	F-box protein 38 [Source:MGI Symbol;Acc:MGI:2444639]	1202.35	1241.52	1224.74	-0.575145	0.144349	-3.98442	6.76457e-05	0.0013559	TRUE	FALSE		3.306	3.859	3.459	2.942	2.899	2.544	2.872		3.54133	2.81425	0.794687	-0.331542
ENSMUSG00000068744	Psrc1	proline/serine-rich coiled-coil 1 [Source:MGI Symbol;Acc:MGI:1913099]	102.534	88.259	94.3768	-1.34918	0.29674	-4.54669	5.44972e-06	0.000175758	TRUE	FALSE		2.574	4.322	3.678	1.81	1.602	1.642	0.977		3.52467	1.50775	0.427771	-1.22509
ENSMUSG00000032397	Tipin	timeless interacting protein [Source:MGI Symbol;Acc:MGI:1921571]	531.972	592.065	566.31	-0.883053	0.168768	-5.23236	1.67362e-07	9.01673e-06	TRUE	FALSE		3.186	3.503	3.706	2.271	2.416	2.119	2.095		3.465	2.22525	0.642208	-0.638888
ENSMUSG00000065954	Tacc1	transforming, acidic coiled-coil containing protein 1 [Source:MGI Symbol;Acc:MGI:2443510]	1252.17	1199.3	1221.96	-0.617222	0.146876	-4.20235	2.6416e-05	0.000645375	TRUE	FALSE		2.798	4.402	3.114	2.502	3.092	2.173	2.562		3.438	2.58225	0.751091	-0.412941
ENSMUSG00000041840	Haus1	HAUS augmin-like complex, subunit 1 [Source:MGI Symbol;Acc:MGI:2385076]	239.882	279.438	262.486	-0.668627	0.202744	-3.29789	0.000974128	0.00994453	TRUE	FALSE		3.143	3.596	3.556	2.277	2.551	2.202	3.118		3.43167	2.537	0.739291	-0.435786
ENSMUSG00000025817	Nudt5	nudix (nucleoside diphosphate linked moiety X)-type motif 5 [Source:MGI Symbol;Acc:MGI:1858232]	674.475	690.675	683.732	-0.66989	0.162298	-4.12753	3.66679e-05	0.00083053	TRUE	FALSE		3.04	3.546	3.553	2.78	2.427	2.405	2.53		3.37967	2.5355	0.750222	-0.414611
ENSMUSG00000021022	Ppp2r3c	protein phosphatase 2, regulatory subunit B'', gamma [Source:MGI Symbol;Acc:MGI:1930009]	557.598	590.312	576.292	-0.586927	0.165829	-3.53936	0.000401101	0.0053675	TRUE	FALSE		3.197	3.755	3.184	2.624	2.799	2.297	2.841		3.37867	2.64025	0.781447	-0.355779
ENSMUSG00000021193	Pitrm1	pitrilysin metallepetidase 1 [Source:MGI Symbol;Acc:MGI:1916867]	845.894	772.221	803.795	-0.747531	0.156234	-4.7847	1.71243e-06	6.60897e-05	TRUE	FALSE		3.073	3.729	3.18	2.524	2.504	2.942	2.055		3.32733	2.50625	0.753231	-0.408836
ENSMUSG00000032329	Hmg20a	high mobility group 20A [Source:MGI Symbol;Acc:MGI:1914117]	2070.94	2156.64	2119.91	-0.478823	0.134834	-3.5512	0.000383473	0.00521674	TRUE	FALSE		3.486	3.151	3.342	3.1	2.687	3.151	2.907		3.32633	2.96125	0.890245	-0.167726
ENSMUSG00000019942	Cdk1	cyclin-dependent kinase 1 [Source:MGI Symbol;Acc:MGI:88351]	323.509	241.748	276.788	-1.90017	0.404019	-4.70318	2.56143e-06	9.41769e-05	TRUE	FALSE		1.709	4.686	3.517	0.883	0.805	0.697	0.402		3.304	0.69675	0.210881	-2.2455
ENSMUSG00000027180	Fbxo3	F-box protein 3 [Source:MGI Symbol;Acc:MGI:1929084]	885.786	951.236	923.186	-0.553182	0.153706	-3.59896	0.000319487	0.00456015	TRUE	FALSE		3.056	3.246	3.606	2.771	2.806	2.749	2.588		3.30267	2.7285	0.826151	-0.275523
ENSMUSG00000000901	Mmp11	matrix metallopeptidase 11 [Source:MGI Symbol;Acc:MGI:97008]	206.581	242.786	227.269	-0.819631	0.238901	-3.43084	0.000601712	0.00710158	TRUE	FALSE		3.105	3.357	3.43	1.261	2.172	3.029	3.116		3.29733	2.3945	0.726193	-0.461575
ENSMUSG00000021276	Cinp	cyclin-dependent kinase 2 interacting protein [Source:MGI Symbol;Acc:MGI:1914486]	414.258	404.124	408.467	-0.650442	0.183525	-3.54416	0.000393867	0.00531264	TRUE	FALSE		3.663	3.163	2.826	2.967	1.984	2.712	2.473		3.21733	2.534	0.787609	-0.344449
ENSMUSG00000042271	Nxt2	nuclear transport factor 2-like export factor 2 [Source:MGI Symbol;Acc:MGI:2147914]	271.236	306.299	291.272	-0.836484	0.194849	-4.29299	1.76285e-05	0.000466835	TRUE	FALSE		2.43	3.55	3.639	1.939	2.223	1.617	2.377		3.20633	2.039	0.635929	-0.653063
ENSMUSG00000030264	Thumpd3	THUMP domain containing 3 [Source:MGI Symbol;Acc:MGI:1277973]	509.442	556.22	536.172	-0.604851	0.1655	-3.65469	0.000257488	0.00386771	TRUE	FALSE		3.326	3.142	3.082	2.769	2.493	2.173	2.428		3.18333	2.46575	0.774581	-0.368512
ENSMUSG00000007880	Arid1a	AT rich interactive domain 1A (SWI-like) [Source:MGI Symbol;Acc:MGI:1935147]	2033.79	2018.09	2024.82	-0.49025	0.141006	-3.4768	0.000507445	0.00624787	TRUE	FALSE		3.102	3.315	3.085	2.676	3.098	3.225	2.411		3.16733	2.8525	0.9006	-0.151042
ENSMUSG00000032641	Gpr19	G protein-coupled receptor 19 [Source:MGI Symbol;Acc:MGI:892973]	740.826	745.662	743.59	-0.518382	0.157207	-3.29745	0.000975677	0.00994945	TRUE	FALSE		3.163	3.185	3.053	2.768	2.8	2.905	2.36		3.13367	2.70825	0.864243	-0.210491
ENSMUSG00000027330	Cdc25b	cell division cycle 25B [Source:MGI Symbol;Acc:MGI:99701]	276.69	230.375	250.224	-1.05637	0.21969	-4.80844	1.5211e-06	5.99467e-05	TRUE	FALSE		2.929	3.442	3.029	2.273	1.416	2.593	1.447		3.13333	1.93225	0.616676	-0.697416
ENSMUSG00000031548	Sfrp1	secreted frizzled-related protein 1 [Source:MGI Symbol;Acc:MGI:892014]	790.35	769.823	778.62	-1.18288	0.19946	-5.93043	3.0215e-09	2.72095e-07	TRUE	FALSE		2.127	3.579	3.685	1.629	1.99	1.779	1.143		3.13033	1.63525	0.522388	-0.936805
ENSMUSG00000030982	9030624J02Rik	RIKEN cDNA 9030624J02 gene [Source:MGI Symbol;Acc:MGI:1918767]	2643.52	2557.47	2594.35	-0.456901	0.138469	-3.29968	0.000967968	0.00990879	TRUE	FALSE		3.127	3.176	2.955	3.154	2.851	2.777	2.262		3.086	2.761	0.894686	-0.160547
ENSMUSG00000028431	Ikbkap	inhibitor of kappa light polypeptide enhancer in B cells, kinase complex-associated protein [Source:MGI Symbol;Acc:MGI:1914544]	1321.42	1264.78	1289.06	-0.497442	0.144214	-3.44933	0.000561979	0.00674122	TRUE	FALSE		3.066	3.219	2.823	2.949	2.673	2.674	2.244		3.036	2.635	0.867918	-0.204369
ENSMUSG00000015937	H2afy	H2A histone family, member Y [Source:MGI Symbol;Acc:MGI:1349392]	1472.62	1499.45	1487.95	-0.62092	0.141117	-4.40004	1.08232e-05	0.000308966	TRUE	FALSE		2.8	3.299	3.002	2.166	2.604	2.696	2.369		3.03367	2.45875	0.810488	-0.303138
ENSMUSG00000015889	Lta4h	leukotriene A4 hydrolase [Source:MGI Symbol;Acc:MGI:96836]	709.759	770.425	744.425	-0.590103	0.167493	-3.52315	0.000426457	0.0055782	TRUE	FALSE		2.882	2.893	3.304	2.467	2.681	2.572	2.108		3.02633	2.457	0.811874	-0.300673
ENSMUSG00000021377	Dek	DEK oncogene (DNA binding) [Source:MGI Symbol;Acc:MGI:1926209]	452.09	480.635	468.402	-0.838789	0.171753	-4.8837	1.04113e-06	4.37112e-05	TRUE	FALSE		2.424	3.342	3.296	1.659	2.264	2.207	2.098		3.02067	2.057	0.680976	-0.554325
ENSMUSG00000029177	Cenpa	centromere protein A [Source:MGI Symbol;Acc:MGI:88375]	133.22	131.014	131.96	-1.90629	0.259055	-7.35864	1.85796e-13	4.02723e-11	TRUE	FALSE		1.864	3.743	3.43	0.745	0.874	0.789	0.982		3.01233	0.8475	0.281343	-1.8296
ENSMUSG00000005583	Mef2c	myocyte enhancer factor 2C [Source:MGI Symbol;Acc:MGI:99458]	3090.83	3922.99	3566.35	-0.838072	0.167936	-4.99043	6.02441e-07	2.75248e-05	TRUE	FALSE		3.635	2.136	3.239	2.025	2.006	2.606	1.79		3.00333	2.10675	0.701471	-0.511545
ENSMUSG00000040044	Orc3	origin recognition complex, subunit 3 [Source:MGI Symbol;Acc:MGI:1354944]	977.551	973.228	975.08	-0.612953	0.166151	-3.68912	0.000225028	0.00349854	TRUE	FALSE		2.441	2.989	3.232	2.647	2.064	2.118	2.174		2.88733	2.25075	0.779526	-0.359332
ENSMUSG00000020448	Rnf185	ring finger protein 185 [Source:MGI Symbol;Acc:MGI:1922078]	884.554	801.805	837.269	-0.544453	0.155515	-3.50098	0.000463556	0.00588218	TRUE	FALSE		2.723	3.146	2.727	2.627	2.379	2.778	2.086		2.86533	2.4675	0.861156	-0.215653
ENSMUSG00000055782	Abcd2	ATP-binding cassette, sub-family D (ALD), member 2 [Source:MGI Symbol;Acc:MGI:1349467]	951.96	914.699	930.668	-0.839786	0.155339	-5.40617	6.43872e-08	3.90958e-06	TRUE	FALSE		2.194	3.71	2.672	1.761	2.51	1.477	1.569		2.85867	1.82925	0.639896	-0.64409
ENSMUSG00000032261	Sh3bgrl2	SH3 domain binding glutamic acid-rich protein like 2 [Source:MGI Symbol;Acc:MGI:1915350]	1758.88	1808.6	1787.29	-1.0616	0.150012	-7.07675	1.47579e-12	2.72379e-10	TRUE	FALSE		2.975	3.098	2.49	1.446	1.929	2.09	1.498		2.85433	1.74075	0.609862	-0.713445
ENSMUSG00000021115	Vrk1	vaccinia related kinase 1 [Source:MGI Symbol;Acc:MGI:1261847]	1416.07	1510.78	1470.19	-0.632318	0.14497	-4.36171	1.2905e-05	0.000360122	TRUE	FALSE		2.814	2.991	2.707	2.064	2.498	2.271	2.102		2.83733	2.23375	0.787271	-0.345068
ENSMUSG00000037851	Iars	isoleucine-tRNA synthetase [Source:MGI Symbol;Acc:MGI:2145219]	1211.09	1198.88	1204.11	-0.524035	0.147075	-3.56305	0.000366572	0.00507672	TRUE	FALSE		2.757	2.932	2.814	2.329	2.61	2.921	2.169		2.83433	2.50725	0.8846	-0.176904
ENSMUSG00000031660	Brd7	bromodomain containing 7 [Source:MGI Symbol;Acc:MGI:1349766]	722.766	686.273	701.913	-0.52887	0.15803	-3.34664	0.000817987	0.00888263	TRUE	FALSE		2.653	3.201	2.632	2.485	2.567	2.408	2.074		2.82867	2.3835	0.842623	-0.247041
ENSMUSG00000026283	Ing5	inhibitor of growth family, member 5 [Source:MGI Symbol;Acc:MGI:1922816]	413.784	374.773	391.492	-0.6586	0.183091	-3.59711	0.00032177	0.00458447	TRUE	FALSE		2.702	3.392	2.387	2.192	2.192	2.291	2.018		2.827	2.17325	0.768748	-0.379418
ENSMUSG00000042079	Hnrnpf	heterogeneous nuclear ribonucleoprotein F [Source:MGI Symbol;Acc:MGI:2138741]	523.383	531.477	528.008	-0.722229	0.167029	-4.32398	1.53237e-05	0.000416398	TRUE	FALSE		2.353	2.999	2.973	1.88	2.03	2.285	2.098		2.775	2.07325	0.747117	-0.420594
ENSMUSG00000030105	Arl8b	ADP-ribosylation factor-like 8B [Source:MGI Symbol;Acc:MGI:1914416]	971.334	918.206	940.975	-0.515095	0.155324	-3.31627	0.00091228	0.00953776	TRUE	FALSE		2.858	2.768	2.696	2.902	2.214	2.506	1.997		2.774	2.40475	0.866889	-0.206081
ENSMUSG00000047786	Lix1	limb expression 1 homolog (chicken) [Source:MGI Symbol;Acc:MGI:1913893]	1170.05	1281.8	1233.91	-0.586738	0.153849	-3.81373	0.000136884	0.00236702	TRUE	FALSE		3.027	2.635	2.625	2.137	2.391	2.491	2.107		2.76233	2.2815	0.825932	-0.275905
ENSMUSG00000027496	Aurka	aurora kinase A [Source:MGI Symbol;Acc:MGI:894678]	227.547	219.53	222.965	-1.77643	0.229211	-7.7502	9.17476e-15	2.71471e-12	TRUE	FALSE		2.328	3.5	2.445	0.816	0.855	0.775	1.118		2.75767	0.891	0.323099	-1.62995
ENSMUSG00000025745	Hadha	hydroxyacyl-Coenzyme A dehydrogenase/3-ketoacyl-Coenzyme A thiolase/enoyl-Coenzyme A hydratase (trifunctional protein), alpha subunit [Source:MGI Symbol;Acc:MGI:2135593]	797.648	791.54	794.158	-0.545005	0.158191	-3.44522	0.000570585	0.00681813	TRUE	FALSE		2.444	2.95	2.826	2.434	2.299	2.182	2.108		2.74	2.25575	0.823266	-0.280569
ENSMUSG00000025358	Cdk2	cyclin-dependent kinase 2 [Source:MGI Symbol;Acc:MGI:104772]	141.785	129.547	134.792	-0.894883	0.265609	-3.36917	0.000753944	0.00835073	TRUE	FALSE		1.953	3.236	3.024	1.962	1.377	1.598	1.81		2.73767	1.68675	0.616127	-0.698701
ENSMUSG00000006398	Cdc20	cell division cycle 20 [Source:MGI Symbol;Acc:MGI:1859866]	61.8236	77.5115	70.7881	-1.47444	0.308021	-4.78683	1.6944e-06	6.56661e-05	TRUE	FALSE		2.035	2.524	3.607	1.045	0.855	1.071	1.167		2.722	1.0345	0.380051	-1.39573
ENSMUSG00000026181	Ppm1f	protein phosphatase 1F (PP2C domain containing) [Source:MGI Symbol;Acc:MGI:1918464]	664.86	623.844	641.423	-0.68076	0.177175	-3.84231	0.000121883	0.00215154	TRUE	FALSE		2.787	2.734	2.614	2.53	1.499	2.326	2.157		2.71167	2.128	0.784757	-0.349682
ENSMUSG00000026843	Fubp3	far upstream element (FUSE) binding protein 3 [Source:MGI Symbol;Acc:MGI:2443699]	970.031	938.317	951.909	-0.535707	0.155761	-3.4393	0.000583229	0.00694252	TRUE	FALSE		2.261	3.156	2.711	2.337	2.337	1.993	2.139		2.70933	2.2015	0.812562	-0.299451
ENSMUSG00000040997	Abhd4	abhydrolase domain containing 4 [Source:MGI Symbol;Acc:MGI:1915938]	290.957	285.326	287.739	-1.14299	0.232884	-4.90796	9.20279e-07	3.93461e-05	TRUE	FALSE		2.119	3.01	2.992	1.879	1.578	1.1	0.975		2.707	1.383	0.510898	-0.968894
ENSMUSG00000051517	Arhgef39	Rho guanine nucleotide exchange factor (GEF) 39 [Source:MGI Symbol;Acc:MGI:3036286]	61.4345	43.9477	51.442	-1.79288	0.364209	-4.92268	8.53686e-07	3.69059e-05	TRUE	FALSE		1.627	3.926	2.529	0.76	0.964	0.826	0.254		2.694	0.701	0.260208	-1.94226
ENSMUSG00000025478	Dpysl4	dihydropyrimidinase-like 4 [Source:MGI Symbol;Acc:MGI:1349764]	272.095	344.476	313.456	-0.892896	0.212354	-4.20475	2.6137e-05	0.000641079	TRUE	FALSE		3.187	2.403	2.472	1.715	2.152	1.515	1.339		2.68733	1.68025	0.625248	-0.677499
ENSMUSG00000030268	Bcat1	branched chain aminotransferase 1, cytosolic [Source:MGI Symbol;Acc:MGI:104861]	1749	1849.18	1806.25	-0.488452	0.142269	-3.43329	0.000596296	0.00707097	TRUE	FALSE		2.886	2.462	2.683	2.348	2.31	2.751	2.227		2.677	2.409	0.899888	-0.152183
ENSMUSG00000005981	Trap1	TNF receptor-associated protein 1 [Source:MGI Symbol;Acc:MGI:1915265]	794.195	813.826	805.412	-0.536075	0.156705	-3.42093	0.000624083	0.00728304	TRUE	FALSE		2.653	2.857	2.507	2.144	2.236	2.328	2.315		2.67233	2.25575	0.844113	-0.244493
ENSMUSG00000029111	Nelfa	negative elongation factor complex member A, Whsc2 [Source:MGI Symbol;Acc:MGI:1346098]	796.735	796.127	796.388	-0.615006	0.173418	-3.54639	0.000390551	0.00527707	TRUE	FALSE		2.909	2.762	2.339	2.291	1.687	2.2	2.382		2.67	2.14	0.801498	-0.319229
ENSMUSG00000040549	Ckap5	cytoskeleton associated protein 5 [Source:MGI Symbol;Acc:MGI:1923036]	1966.21	1915.62	1937.3	-0.598307	0.137536	-4.35019	1.36018e-05	0.000376405	TRUE	FALSE		2.445	2.882	2.575	2.16	2.258	2.263	1.9		2.634	2.14525	0.814446	-0.29611
ENSMUSG00000020936	Nmt1	N-myristoyltransferase 1 [Source:MGI Symbol;Acc:MGI:102579]	839.092	885.252	865.469	-0.500373	0.151052	-3.3126	0.000924342	0.00963145	TRUE	FALSE		2.551	2.519	2.807	2.269	2.141	2.506	2.307		2.62567	2.30575	0.878158	-0.187448
ENSMUSG00000000416	Cttnbp2	cortactin binding protein 2 [Source:MGI Symbol;Acc:MGI:1353467]	3090.83	3238.75	3175.36	-0.447829	0.132956	-3.36826	0.000756434	0.00837333	TRUE	FALSE		2.175	2.847	2.836	2.09	2.286	2.336	2.625		2.61933	2.33425	0.891162	-0.166241
ENSMUSG00000042826	Fgf11	fibroblast growth factor 11 [Source:MGI Symbol;Acc:MGI:109167]	94.2751	104.99	100.398	-1.01062	0.26948	-3.75027	0.000176644	0.00290522	TRUE	FALSE		2.34	2.851	2.576	1.296	1.659	1.33	1.522		2.589	1.45175	0.560738	-0.834602
ENSMUSG00000031201	Brcc3	BRCA1/BRCA2-containing complex, subunit 3 [Source:MGI Symbol;Acc:MGI:2389572]	747.017	764.332	756.911	-0.53327	0.161763	-3.29661	0.000978584	0.00995731	TRUE	FALSE		2.262	2.731	2.754	2.324	2.211	1.933	1.988		2.58233	2.114	0.818639	-0.2887
ENSMUSG00000001228	Uhrf1	ubiquitin-like, containing PHD and RING finger domains, 1 [Source:MGI Symbol;Acc:MGI:1338889]	378.035	315.705	342.418	-1.17027	0.212952	-5.49549	3.89624e-08	2.59392e-06	TRUE	FALSE		2.084	3.155	2.507	1.599	1.113	1.594	1.243		2.582	1.38725	0.537277	-0.896261
ENSMUSG00000034484	Snx2	sorting nexin 2 [Source:MGI Symbol;Acc:MGI:1915054]	823.818	949.558	895.67	-0.530754	0.158793	-3.34242	0.000830505	0.00896974	TRUE	FALSE		2.325	2.694	2.646	1.827	2.097	1.89	2.625		2.555	2.10975	0.825734	-0.276251
ENSMUSG00000031565	Fgfr1	fibroblast growth factor receptor 1 [Source:MGI Symbol;Acc:MGI:95522]	1062.66	1224.2	1154.97	-0.768555	0.144757	-5.30927	1.10065e-07	6.22315e-06	TRUE	FALSE		2.244	2.468	2.923	1.728	1.658	1.741	2.042		2.545	1.79225	0.704224	-0.505894
ENSMUSG00000038132	Rbm24	RNA binding motif protein 24 [Source:MGI Symbol;Acc:MGI:3610364]	274.55	243.901	257.036	-0.737911	0.201134	-3.66875	0.00024374	0.00371057	TRUE	FALSE		2.402	2.496	2.727	1.677	1.703	3.449	1.695		2.54167	2.131	0.838426	-0.254244
ENSMUSG00000036913	Trim67	tripartite motif-containing 67 [Source:MGI Symbol;Acc:MGI:3045323]	761.245	879.633	828.895	-0.610355	0.168725	-3.61747	0.000297502	0.00431239	TRUE	FALSE		2.887	1.989	2.732	2.033	1.939	2.521	1.874		2.536	2.09175	0.824823	-0.277844
ENSMUSG00000037313	Tacc3	transforming, acidic coiled-coil containing protein 3 [Source:MGI Symbol;Acc:MGI:1341163]	338.098	280.003	304.901	-1.68613	0.224703	-7.50383	6.19787e-14	1.60465e-11	TRUE	FALSE		1.704	3.353	2.519	0.877	0.734	1.042	0.963		2.52533	0.904	0.357973	-1.48208
ENSMUSG00000026761	Orc4	origin recognition complex, subunit 4 [Source:MGI Symbol;Acc:MGI:1347043]	842.894	981.355	922.015	-0.516706	0.156646	-3.29856	0.000971808	0.00993173	TRUE	FALSE		2.36	2.613	2.528	2.061	1.966	1.476	2.528		2.50033	2.00775	0.802993	-0.316541
ENSMUSG00000030867	Plk1	polo-like kinase 1 [Source:MGI Symbol;Acc:MGI:97621]	138.035	117.062	126.05	-2.75357	0.296222	-9.29563	1.46342e-20	8.7999e-18	TRUE	FALSE		1.811	3.156	2.51	0.446	0.292	0.562	0.195		2.49233	0.37375	0.14996	-2.73735
ENSMUSG00000001642	Akr1b3	aldo-keto reductase family 1, member B3 (aldose reductase) [Source:MGI Symbol;Acc:MGI:1353494]	289.429	273.609	280.389	-0.730929	0.195636	-3.73616	0.00018685	0.00302247	TRUE	FALSE		2.466	2.637	2.325	1.925	1.738	2.153	1.607		2.476	1.85575	0.749495	-0.416009
ENSMUSG00000032218	Ccnb2	cyclin B2 [Source:MGI Symbol;Acc:MGI:88311]	205.136	174.716	187.753	-1.82851	0.247908	-7.37574	1.63441e-13	3.62702e-11	TRUE	FALSE		1.693	3.526	2.158	0.714	0.761	0.423	0.961		2.459	0.71475	0.290667	-1.78256
ENSMUSG00000034349	Smc4	structural maintenance of chromosomes 4 [Source:MGI Symbol;Acc:MGI:1917349]	486.265	444.281	462.274	-1.23492	0.199701	-6.18383	6.25659e-10	6.5522e-08	TRUE	FALSE		1.724	3.052	2.536	1.275	1.079	1.08	1.285		2.43733	1.17975	0.484033	-1.04682
ENSMUSG00000052957	Gas1	growth arrest specific 1 [Source:MGI Symbol;Acc:MGI:95655]	37.4198	36.833	37.0845	-1.83646	0.400738	-4.5827	4.59012e-06	0.000153067	TRUE	FALSE		1.137	2.801	3.358	0.76	0.386	0.495	0.534		2.432	0.54375	0.223581	-2.16113
ENSMUSG00000005667	Mthfd2	methylenetetrahydrofolate dehydrogenase (NAD+ dependent), methenyltetrahydrofolate cyclohydrolase [Source:MGI Symbol;Acc:MGI:1338850]	367.473	362.115	364.411	-0.663882	0.192607	-3.44682	0.000567225	0.00678667	TRUE	FALSE		1.92	2.652	2.576	1.833	2.027	1.807	1.519		2.38267	1.7965	0.753987	-0.407388
ENSMUSG00000024507	Hsd17b4	hydroxysteroid (17-beta) dehydrogenase 4 [Source:MGI Symbol;Acc:MGI:105089]	1216.08	1328.77	1280.48	-0.588892	0.157405	-3.74125	0.00018311	0.00298371	TRUE	FALSE		2.686	2.187	2.248	1.823	2.038	2.311	1.785		2.37367	1.98925	0.838049	-0.254893
ENSMUSG00000027770	Dhx36	DEAH (Asp-Glu-Ala-His) box polypeptide 36 [Source:MGI Symbol;Acc:MGI:1919412]	722.523	732.598	728.28	-0.551021	0.156818	-3.51376	0.000441811	0.00570242	TRUE	FALSE		2.332	2.528	2.25	2.001	1.944	1.946	1.946		2.37	1.95925	0.826688	-0.274586
ENSMUSG00000022945	Chaf1b	chromatin assembly factor 1, subunit B (p60) [Source:MGI Symbol;Acc:MGI:1314881]	365.457	386.246	377.336	-0.822424	0.182421	-4.50839	6.53207e-06	0.000203619	TRUE	FALSE		2.101	2.525	2.375	1.384	1.794	1.738	1.525		2.33367	1.61025	0.690009	-0.535314
ENSMUSG00000029686	Cul1	cullin 1 [Source:MGI Symbol;Acc:MGI:1349658]	1236.98	1281.58	1262.46	-0.749418	0.158049	-4.74168	2.11954e-06	7.9819e-05	TRUE	FALSE		2.168	2.666	2.143	1.374	1.751	1.779	1.888		2.32567	1.698	0.730113	-0.453808
ENSMUSG00000026097	Ormdl1	ORM1-like 1 (S. cerevisiae) [Source:MGI Symbol;Acc:MGI:2181669]	203.404	237.682	222.992	-0.73536	0.219262	-3.3538	0.000797112	0.00870983	TRUE	FALSE		2.194	2.498	2.264	1.567	1.504	1.184	2.171		2.31867	1.6065	0.692855	-0.529374
ENSMUSG00000040618	Pck2	phosphoenolpyruvate carboxykinase 2 (mitochondrial) [Source:MGI Symbol;Acc:MGI:1860456]	150.919	151.775	151.408	-1.00096	0.237642	-4.21207	2.53046e-05	0.000623946	TRUE	FALSE		1.628	2.893	2.411	1.123	1.492	1.128	1.459		2.31067	1.3005	0.562825	-0.829243
ENSMUSG00000019794	Katna1	katanin p60 (ATPase-containing) subunit A1 [Source:MGI Symbol;Acc:MGI:1344353]	634.367	643.364	639.508	-0.621994	0.175341	-3.54733	0.000389152	0.00527193	TRUE	FALSE		2.011	2.72	2.156	1.886	1.659	1.237	2.013		2.29567	1.69875	0.739981	-0.43444
ENSMUSG00000020290	Xpo1	exportin 1, CRM1 homolog (yeast) [Source:MGI Symbol;Acc:MGI:2144013]	766.731	746.855	755.374	-0.552758	0.164559	-3.35904	0.000782152	0.00856644	TRUE	FALSE		1.993	2.438	2.412	2.09	1.712	1.836	1.862		2.281	1.875	0.822008	-0.282776
ENSMUSG00000005360	Slc1a3	solute carrier family 1 (glial high affinity glutamate transporter), member 3 [Source:MGI Symbol;Acc:MGI:99917]	1140.17	1059.59	1094.13	-1.26438	0.173492	-7.28781	3.15023e-13	6.59813e-11	TRUE	FALSE		1.707	2.902	2.217	1.159	1.04	0.847	1.197		2.27533	1.06075	0.466195	-1.10099
ENSMUSG00000032249	Anp32a	acidic (leucine-rich) nuclear phosphoprotein 32 family, member A [Source:MGI Symbol;Acc:MGI:108447]	634.427	675.303	657.785	-0.667912	0.181762	-3.67465	0.000238175	0.00364817	TRUE	FALSE		2.254	2.197	2.374	1.727	2.104	2.016	1.312		2.275	1.78975	0.786703	-0.346108
ENSMUSG00000067928	Zfp760	zinc finger protein 760 [Source:MGI Symbol;Acc:MGI:2679257]	303.508	306.797	305.387	-0.662618	0.200979	-3.29695	0.000977422	0.00995475	TRUE	FALSE		2.218	2.377	2.222	2.045	1.392	1.489	1.881		2.27233	1.70175	0.7489	-0.417155
ENSMUSG00000030500	Slc17a6	solute carrier family 17 (sodium-dependent inorganic phosphate cotransporter), member 6 [Source:MGI Symbol;Acc:MGI:2156052]	827.263	861.85	847.027	-0.647635	0.154643	-4.18794	2.81492e-05	0.000676197	TRUE	FALSE		1.939	2.434	2.419	1.692	1.88	1.712	1.66		2.264	1.736	0.766784	-0.383107
ENSMUSG00000028016	Ints12	integrator complex subunit 12 [Source:MGI Symbol;Acc:MGI:1919043]	310.063	336.07	324.924	-0.691553	0.187705	-3.68426	0.00022937	0.00355124	TRUE	FALSE		2.176	2.266	2.331	1.661	1.579	1.71	1.805		2.25767	1.68875	0.748007	-0.418877
ENSMUSG00000035455	Fignl1	fidgetin-like 1 [Source:MGI Symbol;Acc:MGI:1890648]	230.131	267.961	251.748	-2.29549	0.21773	-10.5428	5.48489e-26	6.81626e-23	TRUE	FALSE		1.924	2.465	2.357	0.411	0.464	0.517	0.682		2.24867	0.5185	0.230581	-2.11665
ENSMUSG00000029910	Mad2l1	MAD2 mitotic arrest deficient-like 1 [Source:MGI Symbol;Acc:MGI:1860374]	154.06	173.696	165.281	-1.28029	0.236708	-5.40871	6.34789e-08	3.86703e-06	TRUE	FALSE		1.677	2.568	2.496	0.964	0.989	0.754	1.394		2.247	1.02525	0.456275	-1.13202
ENSMUSG00000025574	Tk1	thymidine kinase 1 [Source:MGI Symbol;Acc:MGI:98763]	128.495	121.245	124.352	-2.06935	0.297307	-6.96029	3.39561e-12	5.97147e-10	TRUE	FALSE		1.241	2.677	2.786	0.568	0.324	0.659	0.663		2.23467	0.5535	0.247688	-2.0134
ENSMUSG00000036943	Rab8b	RAB8B, member RAS oncogene family [Source:MGI Symbol;Acc:MGI:2442982]	1096.97	1097.66	1097.37	-1.18807	0.153751	-7.7272	1.09936e-14	3.20205e-12	TRUE	FALSE		1.837	2.772	2.067	0.973	1.282	1.024	1.266		2.22533	1.13625	0.510598	-0.969741
ENSMUSG00000020250	Txnrd1	thioredoxin reductase 1 [Source:MGI Symbol;Acc:MGI:1354175]	683.343	693.636	689.225	-0.607079	0.170923	-3.55176	0.000382657	0.00521426	TRUE	FALSE		2.139	2.211	2.322	1.542	2.079	2.503	1.548		2.224	1.918	0.86241	-0.213554
ENSMUSG00000024791	Cdca5	cell division cycle associated 5 [Source:MGI Symbol;Acc:MGI:1915099]	79.0083	81.4713	80.4157	-1.93376	0.314909	-6.14071	8.21524e-10	8.24677e-08	TRUE	FALSE		1.397	2.475	2.785	0.64	0.42	0.648	0.632		2.219	0.585	0.263632	-1.9234
ENSMUSG00000027168	Pax6	paired box 6 [Source:MGI Symbol;Acc:MGI:97490]	417.129	402.654	408.858	-1.05168	0.194039	-5.41997	5.96096e-08	3.69164e-06	TRUE	FALSE		1.309	2.867	2.394	1.096	1.37	0.867	1.278		2.19	1.15275	0.52637	-0.925851
ENSMUSG00000032193	Ldlr	low density lipoprotein receptor [Source:MGI Symbol;Acc:MGI:96765]	449.397	449.096	449.225	-0.697056	0.205294	-3.3954	0.00068528	0.00777972	TRUE	FALSE		2.152	2.262	2.134	1.384	1.17	2.324	2.264		2.18267	1.7855	0.818036	-0.289764
ENSMUSG00000052533	Nup188	nucleoporin 188 [Source:MGI Symbol;Acc:MGI:2446190]	966.68	933.115	947.5	-0.731422	0.149054	-4.9071	9.24306e-07	3.94279e-05	TRUE	FALSE		2.058	2.378	2.045	1.532	1.655	1.888	1.479		2.16033	1.6385	0.758448	-0.398878
ENSMUSG00000038331	Satb2	special AT-rich sequence binding protein 2 [Source:MGI Symbol;Acc:MGI:2679336]	3014.31	3371.23	3218.26	-0.608845	0.158927	-3.83098	0.000127632	0.002248	TRUE	FALSE		2.037	1.965	2.438	1.262	1.942	2.548	1.814		2.14667	1.8915	0.881134	-0.182567
ENSMUSG00000026924	Sec16a	SEC16 homolog A, endoplasmic reticulum export factor [Source:MGI Symbol;Acc:MGI:2139207]	620.462	583.129	599.129	-0.623955	0.171335	-3.64172	0.000270827	0.00400038	TRUE	FALSE		1.929	2.304	2.206	1.819	1.791	1.953	1.382		2.14633	1.73625	0.808938	-0.305899
ENSMUSG00000029701	Rbm28	RNA binding motif protein 28 [Source:MGI Symbol;Acc:MGI:2655711]	709.491	684.698	695.324	-0.588244	0.158503	-3.71126	0.000206234	0.00326073	TRUE	FALSE		1.926	2.437	2.069	1.687	1.772	1.823	1.69		2.144	1.743	0.812966	-0.298732
ENSMUSG00000024614	Tmx3	thioredoxin-related transmembrane protein 3 [Source:MGI Symbol;Acc:MGI:2442418]	496.151	552.138	528.143	-0.676203	0.166099	-4.07107	4.67971e-05	0.00101435	TRUE	FALSE		2.204	2.071	2.13	1.753	1.559	1.406	1.583		2.135	1.57525	0.737822	-0.438655
ENSMUSG00000010392	Gosr1	golgi SNAP receptor complex member 1 [Source:MGI Symbol;Acc:MGI:1858260]	598.55	618.15	609.75	-0.691441	0.165942	-4.16676	3.08962e-05	0.000730884	TRUE	FALSE		1.981	2.196	2.21	1.355	1.571	2.099	1.771		2.129	1.699	0.798027	-0.32549
ENSMUSG00000020859	Spag9	sperm associated antigen 9 [Source:MGI Symbol;Acc:MGI:1918084]	2037.09	2240.41	2153.27	-0.546077	0.138907	-3.93124	8.45077e-05	0.00161796	TRUE	FALSE		2.123	2.141	2.062	1.699	1.717	1.635	1.88		2.10867	1.73275	0.821728	-0.283268
ENSMUSG00000045092	S1pr1	sphingosine-1-phosphate receptor 1 [Source:MGI Symbol;Acc:MGI:1096355]	77.5464	43.408	58.0388	-1.36304	0.364896	-3.73543	0.000187396	0.00302515	TRUE	FALSE		1.637	3.24	1.38	1.035	0.41	1.238	0.682		2.08567	0.84125	0.403348	-1.3099
ENSMUSG00000035877	Zhx3	zinc fingers and homeoboxes 3 [Source:MGI Symbol;Acc:MGI:2444772]	2056.46	2117.53	2091.36	-0.463523	0.140504	-3.29901	0.000970258	0.00992132	TRUE	FALSE		1.79	2.274	2.168	1.763	2.086	1.738	1.657		2.07733	1.811	0.871791	-0.197946
ENSMUSG00000025759	Mfsd8	major facilitator superfamily domain containing 8 [Source:MGI Symbol;Acc:MGI:1919425]	458.817	464.206	461.896	-0.58995	0.173576	-3.3988	0.000676823	0.00771661	TRUE	FALSE		2.14	2.014	2.039	1.949	1.437	1.664	1.624		2.06433	1.6685	0.808251	-0.307124
ENSMUSG00000033411	Ctdspl2	CTD (carboxy-terminal domain, RNA polymerase II, polypeptide A) small phosphatase like 2 [Source:MGI Symbol;Acc:MGI:1196405]	942.283	922.406	930.925	-0.541367	0.153925	-3.51709	0.000436304	0.0056677	TRUE	FALSE		1.792	2.357	2.018	1.715	1.696	1.599	1.732		2.05567	1.6855	0.819929	-0.28643
ENSMUSG00000042589	Cux2	cut-like homeobox 2 [Source:MGI Symbol;Acc:MGI:107321]	2951.09	2766.87	2845.82	-0.908485	0.146431	-6.20419	5.4981e-10	5.7904e-08	TRUE	FALSE		1.605	2.616	1.942	1.014	1.399	1.504	1.495		2.05433	1.353	0.658608	-0.602508
ENSMUSG00000023919	Cenpq	centromere protein Q [Source:MGI Symbol;Acc:MGI:1933744]	158.593	145.295	150.995	-1.32425	0.288351	-4.5925	4.37973e-06	0.000147369	TRUE	FALSE		1.316	2.519	2.326	1.088	0.531	0.774	1.224		2.05367	0.90425	0.44031	-1.18341
ENSMUSG00000022887	Masp1	mannan-binding lectin serine peptidase 1 [Source:MGI Symbol;Acc:MGI:88492]	990.395	1033.59	1015.08	-0.875049	0.169624	-5.15876	2.48596e-07	1.2731e-05	TRUE	FALSE		1.976	1.89	2.146	1.286	1.518	1.87	1.041		2.004	1.42875	0.712949	-0.488129
ENSMUSG00000026547	Tagln2	transgelin 2 [Source:MGI Symbol;Acc:MGI:1312985]	94.9546	87.9251	90.9377	-1.22662	0.335704	-3.65388	0.000258311	0.00387696	TRUE	FALSE		1.141	1.976	2.893	1.33	0.519	1.15	0.708		2.00333	0.92675	0.462604	-1.11215
ENSMUSG00000028212	Ccne2	cyclin E2 [Source:MGI Symbol;Acc:MGI:1329034]	154.949	149.214	151.672	-1.71266	0.260769	-6.56775	5.10821e-11	6.85052e-09	TRUE	FALSE		1.304	2.383	2.299	0.693	0.531	0.683	0.757		1.99533	0.666	0.333779	-1.58304
ENSMUSG00000037278	Tmem97	transmembrane protein 97 [Source:MGI Symbol;Acc:MGI:1916321]	124.148	125.041	124.658	-0.894127	0.257749	-3.46898	0.000522431	0.00638599	TRUE	FALSE		1.955	2.11	1.899	1.39	0.998	1.268	1.387		1.988	1.26075	0.63418	-0.657036
ENSMUSG00000017499	Cdc6	cell division cycle 6 [Source:MGI Symbol;Acc:MGI:1345150]	188.288	143.222	162.536	-2.39247	0.248331	-9.6342	5.73347e-22	4.45323e-19	TRUE	FALSE		1.566	2.785	1.552	0.418	0.454	0.469	0.266		1.96767	0.40175	0.204176	-2.29212
ENSMUSG00000027306	Nusap1	nucleolar and spindle associated protein 1 [Source:MGI Symbol;Acc:MGI:2675669]	396.754	302.417	342.847	-2.11307	0.228643	-9.2418	2.42388e-20	1.41199e-17	TRUE	FALSE		1.144	2.836	1.906	0.478	0.445	0.49	0.528		1.962	0.48525	0.247324	-2.01552
ENSMUSG00000027635	Dsn1	DSN1 homolog, MIS12 kinetochore complex component [Source:MGI Symbol;Acc:MGI:1914184]	152.605	152.895	152.771	-1.02159	0.273379	-3.7369	0.000186306	0.00301994	TRUE	FALSE		1.205	2.249	2.412	1.262	1.32	0.812	0.779		1.95533	1.04325	0.533541	-0.90633
ENSMUSG00000023224	Serping1	serine (or cysteine) peptidase inhibitor, clade G, member 1 [Source:MGI Symbol;Acc:MGI:894696]	107.568	133.643	122.468	-1.32612	0.295575	-4.48659	7.23723e-06	0.00022189	TRUE	FALSE		1.519	1.888	2.442	0.492	1.352	1.203	0.539		1.94967	0.8965	0.459822	-1.12085
ENSMUSG00000066640	Fbxl18	F-box and leucine-rich repeat protein 18 [Source:MGI Symbol;Acc:MGI:2444450]	425.396	412.753	418.172	-0.768918	0.200718	-3.83083	0.000127709	0.002248	TRUE	FALSE		2.53	2.035	1.275	1.386	1.864	1.794	0.754		1.94667	1.4495	0.744606	-0.425451
ENSMUSG00000042323	Pbrm1	polybromo 1 [Source:MGI Symbol;Acc:MGI:1923998]	1539.3	1614.09	1582.04	-0.510849	0.140314	-3.64076	0.000271834	0.00401207	TRUE	FALSE		1.786	2.138	1.906	1.554	1.718	1.528	1.722		1.94333	1.6305	0.839022	-0.253219
ENSMUSG00000061353	Cxcl12	chemokine (C-X-C motif) ligand 12 [Source:MGI Symbol;Acc:MGI:103556]	165.123	182.867	175.262	-0.866558	0.254412	-3.40612	0.000658926	0.00756656	TRUE	FALSE		1.668	2.361	1.788	0.959	1.097	0.971	1.919		1.939	1.2365	0.6377	-0.649051
ENSMUSG00000056394	Lig1	ligase I, DNA, ATP-dependent [Source:MGI Symbol;Acc:MGI:101789]	384.191	385.692	385.049	-1.59361	0.207593	-7.67662	1.63338e-14	4.61331e-12	TRUE	FALSE		1.382	2.237	2.186	0.821	0.782	0.637	0.615		1.935	0.71375	0.368863	-1.43884
ENSMUSG00000005034	Prkacb	protein kinase, cAMP dependent, catalytic, beta [Source:MGI Symbol;Acc:MGI:97594]	1139.48	1303.82	1233.39	-0.670391	0.161303	-4.15609	3.23735e-05	0.000756234	TRUE	FALSE		2.106	1.797	1.869	1.298	1.587	1.695	1.451		1.924	1.50775	0.783654	-0.351712
ENSMUSG00000022665	Ccdc80	coiled-coil domain containing 80 [Source:MGI Symbol;Acc:MGI:1915146]	415.979	347.741	376.986	-1.60645	0.198602	-8.08877	6.02686e-16	2.11975e-13	TRUE	FALSE		1.037	2.7	1.899	0.543	0.793	0.609	0.746		1.87867	0.67275	0.3581	-1.48157
ENSMUSG00000022678	Nde1	nuclear distribution gene E homolog 1 (A nidulans) [Source:MGI Symbol;Acc:MGI:1914453]	346.614	323.963	333.671	-1.45107	0.20217	-7.17747	7.10136e-13	1.39344e-10	TRUE	FALSE		1.341	2.399	1.892	0.815	0.837	0.602	0.769		1.87733	0.75575	0.402566	-1.3127
ENSMUSG00000020593	Lpin1	lipin 1 [Source:MGI Symbol;Acc:MGI:1891340]	761.486	772.514	767.788	-0.650562	0.154209	-4.21871	2.45705e-05	0.000609243	TRUE	FALSE		1.691	2.065	1.813	1.359	1.557	1.443	1.369		1.85633	1.432	0.771413	-0.374424
ENSMUSG00000006715	Gmnn	geminin [Source:MGI Symbol;Acc:MGI:1927344]	126.236	113.04	118.695	-1.18298	0.27987	-4.2269	2.3693e-05	0.000593631	TRUE	FALSE		1.481	2.26	1.821	1.221	0.717	0.715	0.964		1.854	0.90425	0.487729	-1.03585
ENSMUSG00000038526	Car14	carbonic anhydrase 14 [Source:MGI Symbol;Acc:MGI:1344341]	72.1967	70.947	71.4826	-1.67639	0.309655	-5.41375	6.17194e-08	3.80964e-06	TRUE	FALSE		1.147	2.306	2.016	0.347	0.591	0.688	0.783		1.823	0.60225	0.330362	-1.59788
ENSMUSG00000028312	Smc2	structural maintenance of chromosomes 2 [Source:MGI Symbol;Acc:MGI:106067]	599.307	572.544	584.014	-1.08062	0.174783	-6.18267	6.30247e-10	6.56337e-08	TRUE	FALSE		1.399	2.174	1.802	1.001	0.986	0.927	1.032		1.79167	0.9865	0.550605	-0.860911
ENSMUSG00000030726	Pold3	polymerase (DNA-directed), delta 3, accessory subunit [Source:MGI Symbol;Acc:MGI:1915217]	529.768	526.494	527.897	-0.687334	0.168862	-4.07038	4.69368e-05	0.0010162	TRUE	FALSE		1.59	1.96	1.764	1.312	1.287	1.375	1.368		1.77133	1.3355	0.753952	-0.407456
ENSMUSG00000053398	Phgdh	3-phosphoglycerate dehydrogenase [Source:MGI Symbol;Acc:MGI:1355330]	300.045	280.278	288.749	-1.38366	0.226218	-6.11649	9.56581e-10	9.33593e-08	TRUE	FALSE		1.1	2.077	2.095	0.811	0.681	0.834	0.75		1.75733	0.769	0.437595	-1.19233
ENSMUSG00000022816	Fstl1	follistatin-like 1 [Source:MGI Symbol;Acc:MGI:102793]	709.822	684.016	695.076	-1.11356	0.173518	-6.41753	1.385e-10	1.67648e-08	TRUE	FALSE		1.593	1.919	1.753	1.19	0.896	0.953	0.841		1.755	0.97	0.552707	-0.855414
ENSMUSG00000026708	Cenpl	centromere protein L [Source:MGI Symbol;Acc:MGI:1917704]	203.455	202.379	202.84	-0.792163	0.223814	-3.53937	0.000401077	0.0053675	TRUE	FALSE		1.574	1.878	1.803	1.34	1.33	1.175	0.931		1.75167	1.194	0.681637	-0.552925
ENSMUSG00000034042	Gpbp1l1	GC-rich promoter binding protein 1-like 1 [Source:MGI Symbol;Acc:MGI:1924360]	481.108	477.034	478.78	-0.599294	0.175575	-3.41332	0.000641769	0.00743057	TRUE	FALSE		1.329	2	1.836	1.309	1.41	1.269	1.378		1.72167	1.3415	0.779187	-0.359959
ENSMUSG00000031821	Gins2	GINS complex subunit 2 (Psf2 homolog) [Source:MGI Symbol;Acc:MGI:1921019]	109.866	103.297	106.112	-1.56785	0.27268	-5.74978	8.93602e-09	7.02853e-07	TRUE	FALSE		1.189	2.353	1.603	0.478	0.749	0.447	0.762		1.715	0.609	0.355102	-1.49369
ENSMUSG00000038871	Bpgm	2,3-bisphosphoglycerate mutase [Source:MGI Symbol;Acc:MGI:1098242]	397.393	349.196	369.852	-0.705413	0.199249	-3.54036	0.000399586	0.00536012	TRUE	FALSE		1.54	2.271	1.297	1.214	1.264	1.093	1.26		1.70267	1.20775	0.709329	-0.495474
ENSMUSG00000022489	Pde1b	phosphodiesterase 1B, Ca2+-calmodulin dependent [Source:MGI Symbol;Acc:MGI:97523]	266.531	384.331	333.846	-0.767393	0.221685	-3.46164	0.000536903	0.00652362	TRUE	FALSE		1.683	1.468	1.933	0.74	1.329	1.229	1.528		1.69467	1.2065	0.711939	-0.490174
ENSMUSG00000001864	Aif1l	allograft inflammatory factor 1-like [Source:MGI Symbol;Acc:MGI:1919598]	251.56	260.111	256.446	-1.14871	0.21229	-5.41104	6.26614e-08	3.84234e-06	TRUE	FALSE		1.118	1.875	2.055	0.766	0.971	0.991	0.824		1.68267	0.888	0.527734	-0.922118
ENSMUSG00000039202	Abhd2	abhydrolase domain containing 2 [Source:MGI Symbol;Acc:MGI:1914344]	1129	1288.34	1220.05	-0.564145	0.168273	-3.35255	0.000800705	0.00873884	TRUE	FALSE		1.609	1.757	1.616	1.011	1.486	1.47	1.62		1.66067	1.39675	0.841078	-0.249689
ENSMUSG00000032405	Pias1	protein inhibitor of activated STAT 1 [Source:MGI Symbol;Acc:MGI:1913125]	1354.89	1370.31	1363.7	-0.474352	0.143208	-3.31233	0.000925222	0.00963317	TRUE	FALSE		1.641	1.73	1.585	1.412	1.566	1.587	1.342		1.652	1.47675	0.893916	-0.161788
ENSMUSG00000034906	Ncaph	non-SMC condensin I complex, subunit H [Source:MGI Symbol;Acc:MGI:2444777]	338.447	262.579	295.094	-1.51488	0.229905	-6.58915	4.42352e-11	5.9786e-09	TRUE	FALSE		1.068	2.295	1.585	0.746	0.7	0.624	0.487		1.64933	0.63925	0.387581	-1.36743
ENSMUSG00000019961	Tmpo	thymopoietin [Source:MGI Symbol;Acc:MGI:106920]	258.897	278.811	270.277	-0.914736	0.20025	-4.56798	4.92445e-06	0.000161899	TRUE	FALSE		1.265	1.749	1.847	0.962	1.01	0.962	1.082		1.62033	1.004	0.619626	-0.690531
ENSMUSG00000041530	Ago1	argonaute RISC catalytic subunit 1 [Source:MGI Symbol;Acc:MGI:2446630]	412.503	398.3	404.387	-0.751517	0.187452	-4.00912	6.0945e-05	0.00124707	TRUE	FALSE		1.298	1.738	1.805	1.144	1.21	1.387	1.003		1.61367	1.186	0.734972	-0.444239
ENSMUSG00000038446	Cdc40	cell division cycle 40 [Source:MGI Symbol;Acc:MGI:1918963]	646.723	647.461	647.145	-0.547304	0.160688	-3.40601	0.000659197	0.00756656	TRUE	FALSE		1.539	1.912	1.382	1.287	1.527	1.122	1.228		1.611	1.291	0.801366	-0.319467
ENSMUSG00000028066	Pmf1	polyamine-modulated factor 1 [Source:MGI Symbol;Acc:MGI:1914287]	149.866	162.67	157.182	-1.39387	0.240821	-5.78797	7.12418e-09	5.74595e-07	TRUE	FALSE		1.071	1.848	1.913	0.639	0.734	0.551	0.74		1.61067	0.666	0.413493	-1.27406
ENSMUSG00000014355	Anapc1	anaphase promoting complex subunit 1 [Source:MGI Symbol;Acc:MGI:103097]	947.175	1007.39	981.584	-0.592177	0.152392	-3.88589	0.000101958	0.00186882	TRUE	FALSE		1.644	1.567	1.609	1.227	1.328	1.52	1.283		1.60667	1.3395	0.833714	-0.262376
ENSMUSG00000026235	Epha4	Eph receptor A4 [Source:MGI Symbol;Acc:MGI:98277]	1703.08	1822.86	1771.53	-0.707653	0.165063	-4.28717	1.80961e-05	0.000477127	TRUE	FALSE		1.3	1.596	1.844	1.086	1.416	1.329	0.964		1.58	1.19875	0.758703	-0.398394
ENSMUSG00000022471	Xrcc6	X-ray repair complementing defective repair in Chinese hamster cells 6 [Source:MGI Symbol;Acc:MGI:95606]	559.249	608.555	587.424	-0.835791	0.165676	-5.04472	4.54179e-07	2.13258e-05	TRUE	FALSE		1.364	1.634	1.729	1.065	1.081	0.982	1.042		1.57567	1.0425	0.661625	-0.595915
ENSMUSG00000052534	Pbx1	pre B cell leukemia homeobox 1 [Source:MGI Symbol;Acc:MGI:97495]	3933.03	3891.75	3909.44	-0.639544	0.137096	-4.66494	3.08701e-06	0.000110029	TRUE	FALSE		1.598	1.604	1.513	1.16	1.378	1.659	1.093		1.57167	1.3225	0.841463	-0.249028
ENSMUSG00000031226	Pbdc1	polysaccharide biosynthesis domain containing 1 [Source:MGI Symbol;Acc:MGI:1914933]	442.395	406.754	422.028	-0.833851	0.187336	-4.45109	8.54356e-06	0.000256046	TRUE	FALSE		1.276	1.878	1.533	1.013	0.96	1.159	1.131		1.56233	1.06575	0.682153	-0.551833
ENSMUSG00000054115	Skp2	S-phase kinase-associated protein 2 (p45) [Source:MGI Symbol;Acc:MGI:1351663]	477.459	426.251	448.197	-1.06811	0.192371	-5.55234	2.81873e-08	1.93889e-06	TRUE	FALSE		1.216	1.994	1.474	0.988	0.887	0.695	0.801		1.56133	0.84275	0.539763	-0.889602
ENSMUSG00000037725	Ckap2	cytoskeleton associated protein 2 [Source:MGI Symbol;Acc:MGI:1931797]	189.637	178.77	183.427	-1.03225	0.238014	-4.3369	1.44503e-05	0.000395548	TRUE	FALSE		1.153	1.838	1.682	0.993	0.915	0.795	0.754		1.55767	0.86425	0.554836	-0.849866
ENSMUSG00000048327	Ckap2l	cytoskeleton associated protein 2-like [Source:MGI Symbol;Acc:MGI:1917716]	261.094	236.941	247.292	-1.96723	0.211004	-9.32317	1.12913e-20	7.25799e-18	TRUE	FALSE		1.294	1.945	1.401	0.435	0.469	0.523	0.405		1.54667	0.458	0.296121	-1.75574
ENSMUSG00000039361	Picalm	phosphatidylinositol binding clathrin assembly protein [Source:MGI Symbol;Acc:MGI:2385902]	930.559	1039.58	992.858	-0.624225	0.154522	-4.0397	5.35187e-05	0.00112474	TRUE	FALSE		1.442	1.636	1.561	1.025	1.292	1.204	1.348		1.54633	1.21725	0.787185	-0.345226
ENSMUSG00000048388	Fam171b	family with sequence similarity 171, member B [Source:MGI Symbol;Acc:MGI:2444579]	822.209	837.633	831.023	-0.705617	0.155181	-4.54706	5.44008e-06	0.000175751	TRUE	FALSE		1.354	1.76	1.524	0.963	1.247	1.268	1.208		1.546	1.1715	0.757762	-0.400183
ENSMUSG00000010362	Rdm1	RAD52 motif 1 [Source:MGI Symbol;Acc:MGI:1913849]	99.0215	76.2835	86.0283	-1.09159	0.3105	-3.5156	0.00043877	0.00568567	TRUE	FALSE		0.862	2.08	1.556	0.876	0.715	0.741	0.685		1.49933	0.75425	0.503057	-0.991206
ENSMUSG00000034088	Hdlbp	high density lipoprotein (HDL) binding protein [Source:MGI Symbol;Acc:MGI:99256]	828.713	851.264	841.599	-0.622975	0.155887	-3.99631	6.43366e-05	0.00130217	TRUE	FALSE		1.369	1.503	1.604	1.221	1.181	1.264	1.094		1.492	1.19	0.797587	-0.326286
ENSMUSG00000020790	Ankfy1	ankyrin repeat and FYVE domain containing 1 [Source:MGI Symbol;Acc:MGI:1337008]	959.066	952.398	955.256	-0.629579	0.151965	-4.14292	3.42905e-05	0.0007911	TRUE	FALSE		1.399	1.617	1.45	1.085	1.15	1.366	1.232		1.48867	1.20825	0.811632	-0.301102
ENSMUSG00000030447	Cyfip1	cytoplasmic FMR1 interacting protein 1 [Source:MGI Symbol;Acc:MGI:1338801]	1078.57	1047.68	1060.92	-0.564408	0.148383	-3.80373	0.000142533	0.0024443	TRUE	FALSE		1.511	1.437	1.454	1.394	1.106	1.379	1.104		1.46733	1.24575	0.848989	-0.236182
ENSMUSG00000027650	Tti1	TELO2 interacting protein 1 [Source:MGI Symbol;Acc:MGI:1922675]	512.005	511.527	511.732	-0.691888	0.172687	-4.0066	6.16002e-05	0.00125909	TRUE	FALSE		1.403	1.545	1.402	1.113	0.973	1.161	1.158		1.45	1.10125	0.759483	-0.396911
ENSMUSG00000028678	Kif2c	kinesin family member 2C [Source:MGI Symbol;Acc:MGI:1921054]	195.831	169.142	180.58	-1.96426	0.264204	-7.43462	1.04873e-13	2.4746e-11	TRUE	FALSE		1.208	2.001	1.134	0.339	0.343	0.351	0.55		1.44767	0.39575	0.273371	-1.87107
ENSMUSG00000027574	Nkain4	Na+/K+ transporting ATPase interacting 4 [Source:MGI Symbol;Acc:MGI:1915372]	211.409	200.924	205.417	-0.800972	0.221363	-3.61837	0.000296467	0.00430743	TRUE	FALSE		1.031	1.773	1.52	0.941	1.064	0.883	0.918		1.44133	0.9515	0.660153	-0.599128
ENSMUSG00000040084	Bub1b	BUB1B, mitotic checkpoint serine/threonine kinase [Source:MGI Symbol;Acc:MGI:1333889]	374.272	323.705	345.377	-1.74159	0.208316	-8.36031	6.2552e-17	2.59118e-14	TRUE	FALSE		1.064	1.972	1.163	0.373	0.513	0.4	0.562		1.39967	0.462	0.330079	-1.59912
ENSMUSG00000037815	Ctnna1	catenin (cadherin associated protein), alpha 1 [Source:MGI Symbol;Acc:MGI:88274]	1201.51	1130.2	1160.76	-1.47324	0.167244	-8.80895	1.2632e-18	6.54093e-16	TRUE	FALSE		0.985	1.72	1.471	0.534	0.763	0.659	0.455		1.392	0.60275	0.43301	-1.20753
ENSMUSG00000039473	Ubn1	ubinuclein 1 [Source:MGI Symbol;Acc:MGI:1891307]	388.934	378.051	382.716	-0.657112	0.181286	-3.62472	0.000289272	0.00423258	TRUE	FALSE		1.239	1.558	1.343	1.011	1.056	1.151	1.066		1.38	1.071	0.776087	-0.36571
ENSMUSG00000027469	Tpx2	TPX2, microtubule-associated protein homolog (Xenopus laevis) [Source:MGI Symbol;Acc:MGI:1919369]	381.602	319.899	346.343	-2.11024	0.205405	-10.2736	9.27065e-25	1.08009e-21	TRUE	FALSE		0.889	1.921	1.328	0.339	0.402	0.279	0.339		1.37933	0.33975	0.246315	-2.02143
ENSMUSG00000025453	Nnt	nicotinamide nucleotide transhydrogenase [Source:MGI Symbol;Acc:MGI:109279]	723.306	816.805	776.734	-0.656062	0.164115	-3.99758	6.3993e-05	0.00129662	TRUE	FALSE		1.168	1.369	1.548	0.81	1.21	1.243	1.081		1.36167	1.086	0.797552	-0.326349
ENSMUSG00000092060	Bend4	BEN domain containing 4 [Source:MGI Symbol;Acc:MGI:3648414]	337.099	281.565	305.365	-1.26232	0.222449	-5.67464	1.38984e-08	1.05317e-06	TRUE	FALSE		0.811	1.817	1.401	0.651	0.752	0.605	0.493		1.343	0.62525	0.465562	-1.10295
ENSMUSG00000025077	Dclre1a	DNA cross-link repair 1A [Source:MGI Symbol;Acc:MGI:1930042]	194.91	183.26	188.253	-0.825336	0.235503	-3.50456	0.000457354	0.0058322	TRUE	FALSE		1.49	1.322	1.209	1.023	0.589	1.251	1.008		1.34033	0.96775	0.722022	-0.469886
ENSMUSG00000026193	Fn1	fibronectin 1 [Source:MGI Symbol;Acc:MGI:95566]	777.257	632.046	694.279	-0.789153	0.19292	-4.09057	4.30309e-05	0.000949278	TRUE	FALSE		1.231	1.796	0.98	0.623	1.045	1.504	0.958		1.33567	1.0325	0.773022	-0.371418
ENSMUSG00000048799	Cep120	centrosomal protein 120 [Source:MGI Symbol;Acc:MGI:2147298]	668.496	657.064	661.963	-0.609049	0.166644	-3.65478	0.000257401	0.00386771	TRUE	FALSE		1.27	1.254	1.422	1.046	1.082	1.478	0.913		1.31533	1.12975	0.858908	-0.219425
ENSMUSG00000033596	Rfwd3	ring finger and WD repeat domain 3 [Source:MGI Symbol;Acc:MGI:2384584]	260.555	267.591	264.575	-1.02051	0.220947	-4.61882	3.85931e-06	0.000133472	TRUE	FALSE		1.176	1.382	1.378	0.738	0.987	0.931	0.509		1.312	0.79125	0.603087	-0.729562
ENSMUSG00000002055	Spag5	sperm associated antigen 5 [Source:MGI Symbol;Acc:MGI:1927470]	189.372	138.548	160.33	-1.6844	0.259589	-6.48869	8.65869e-11	1.098e-08	TRUE	FALSE		0.948	1.766	1.219	0.495	0.463	0.718	0.259		1.311	0.48375	0.368993	-1.43833
ENSMUSG00000025086	Trub1	TruB pseudouridine (psi) synthase homolog 1 (E. coli) [Source:MGI Symbol;Acc:MGI:1919383]	359.731	382.055	372.488	-0.737343	0.18552	-3.97447	7.05365e-05	0.00139287	TRUE	FALSE		1.237	1.3	1.39	0.925	1.008	1.068	0.854		1.309	0.96375	0.736249	-0.441734
ENSMUSG00000023940	Sgol1	shugoshin-like 1 (S. pombe) [Source:MGI Symbol;Acc:MGI:1919665]	87.483	98.5876	93.8285	-2.44358	0.30105	-8.11685	4.78436e-16	1.7151e-13	TRUE	FALSE		0.955	1.449	1.491	0.248	0.17	0.193	0.326		1.29833	0.23425	0.180424	-2.47054
ENSMUSG00000033910	Gucy1a3	guanylate cyclase 1, soluble, alpha 3 [Source:MGI Symbol;Acc:MGI:1926562]	359.326	512.48	446.843	-1.24456	0.218416	-5.69813	1.21131e-08	9.33058e-07	TRUE	FALSE		1.353	0.983	1.535	0.458	0.745	0.884	0.605		1.29033	0.673	0.521571	-0.939065
ENSMUSG00000022122	Ednrb	endothelin receptor type B [Source:MGI Symbol;Acc:MGI:102720]	246.459	227.157	235.429	-1.2719	0.224713	-5.6601	1.51286e-08	1.13714e-06	TRUE	FALSE		0.829	1.767	1.274	0.594	0.647	0.343	0.688		1.29	0.568	0.44031	-1.18341
ENSMUSG00000029309	Sparcl1	SPARC-like 1 [Source:MGI Symbol;Acc:MGI:108110]	297.903	352.227	328.945	-0.759705	0.203346	-3.73603	0.000186949	0.00302247	TRUE	FALSE		1.665	1.059	1.143	0.919	0.912	1.066	0.802		1.289	0.92475	0.717417	-0.479117
ENSMUSG00000033031	C330027C09Rik	RIKEN cDNA C330027C09 gene [Source:MGI Symbol;Acc:MGI:2146335]	214.17	183.843	196.84	-1.50872	0.233805	-6.45289	1.0974e-10	1.34583e-08	TRUE	FALSE		1.146	1.56	1.142	0.652	0.488	0.579	0.381		1.28267	0.525	0.409304	-1.28876
ENSMUSG00000028702	Rad54l	RAD54 like (S. cerevisiae) [Source:MGI Symbol;Acc:MGI:894697]	272.149	249.962	259.471	-0.92132	0.227962	-4.04155	5.30994e-05	0.00111845	TRUE	FALSE		0.886	1.498	1.442	0.882	0.65	0.772	0.829		1.27533	0.78325	0.614153	-0.70333
ENSMUSG00000050953	Gja1	gap junction protein, alpha 1 [Source:MGI Symbol;Acc:MGI:95713]	129.416	94.9299	109.709	-1.1573	0.305886	-3.78343	0.000154682	0.0026213	TRUE	FALSE		0.855	1.92	1.042	0.366	0.457	0.959	0.913		1.27233	0.67375	0.529539	-0.917191
ENSMUSG00000021975	Ints9	integrator complex subunit 9 [Source:MGI Symbol;Acc:MGI:1098533]	903.228	828.586	860.576	-0.696291	0.159176	-4.37433	1.21804e-05	0.000341436	TRUE	FALSE		1.207	1.378	1.186	1.074	0.997	1.06	0.737		1.257	0.967	0.769292	-0.378397
ENSMUSG00000062248	Cks2	CDC28 protein kinase regulatory subunit 2 [Source:MGI Symbol;Acc:MGI:1913447]	42.6712	38.5126	40.2948	-1.35199	0.363051	-3.72396	0.000196119	0.00314347	TRUE	FALSE		1.001	1.599	1.162	0.497	0.508	0.473	0.458		1.254	0.484	0.385965	-1.37346
ENSMUSG00000029705	Cux1	cut-like homeobox 1 [Source:MGI Symbol;Acc:MGI:88568]	3109.65	3097.7	3102.82	-0.704175	0.140441	-5.01403	5.33023e-07	2.45524e-05	TRUE	FALSE		1.01	1.325	1.34	0.662	1.04	1.407	0.99		1.225	1.02475	0.836531	-0.25751
ENSMUSG00000027363	Usp8	ubiquitin specific peptidase 8 [Source:MGI Symbol;Acc:MGI:1934029]	456.586	489.991	475.675	-0.722375	0.173575	-4.16175	3.15819e-05	0.000743461	TRUE	FALSE		1.252	1.258	1.164	0.866	0.979	0.924	0.83		1.22467	0.89975	0.73469	-0.444793
ENSMUSG00000028933	Xrcc2	X-ray repair complementing defective repair in Chinese hamster cells 2 [Source:MGI Symbol;Acc:MGI:1927345]	135.273	120.416	126.783	-1.2969	0.255729	-5.07137	3.94957e-07	1.87338e-05	TRUE	FALSE		1.024	1.34	1.301	0.534	0.445	1.007	0.55		1.22167	0.634	0.518963	-0.946296
ENSMUSG00000038685	Rtel1	regulator of telomere elongation helicase 1 [Source:MGI Symbol;Acc:MGI:2139369]	317.263	317.14	317.193	-0.835576	0.193905	-4.30921	1.63842e-05	0.000438189	TRUE	FALSE		0.987	1.332	1.288	0.822	0.794	0.799	0.784		1.20233	0.79975	0.665165	-0.588216
ENSMUSG00000033377	Palmd	palmdelphin [Source:MGI Symbol;Acc:MGI:2148896]	466.31	430.323	445.746	-0.858406	0.176423	-4.8656	1.14111e-06	4.73528e-05	TRUE	FALSE		0.765	1.471	1.364	0.577	0.894	1.084	0.797		1.2	0.838	0.698333	-0.518012
ENSMUSG00000022034	Esco2	establishment of sister chromatid cohesion N-acetyltransferase 2 [Source:MGI Symbol;Acc:MGI:1919238]	101.474	100.929	101.163	-1.64126	0.284726	-5.76436	8.19687e-09	6.55785e-07	TRUE	FALSE		0.762	1.456	1.348	0.351	0.553	0.384	0.302		1.18867	0.3975	0.334408	-1.58032
ENSMUSG00000025855	Prkar1b	protein kinase, cAMP dependent regulatory, type I beta [Source:MGI Symbol;Acc:MGI:97759]	1360.22	1276.37	1312.3	-0.588893	0.162056	-3.63389	0.00027918	0.0041075	TRUE	FALSE		1.33	1.122	1.089	0.822	0.926	1.719	0.98		1.18033	1.11175	0.941895	-0.0863619
ENSMUSG00000005672	Kit	kit oncogene [Source:MGI Symbol;Acc:MGI:96677]	650.34	674.081	663.906	-0.931926	0.189757	-4.91116	9.05375e-07	3.88873e-05	TRUE	FALSE		1.512	1.044	0.956	1.241	0.753	0.515	0.395		1.17067	0.726	0.620159	-0.689289
ENSMUSG00000028583	Pdpn	podoplanin [Source:MGI Symbol;Acc:MGI:103098]	204.733	212.874	209.385	-1.7286	0.240151	-7.19795	6.11245e-13	1.21215e-10	TRUE	FALSE		0.701	1.389	1.38	0.35	0.311	0.312	0.541		1.15667	0.3785	0.327233	-1.61161
ENSMUSG00000074802	Gas2l3	growth arrest-specific 2 like 3 [Source:MGI Symbol;Acc:MGI:1918780]	259.819	230.707	243.184	-1.47405	0.223051	-6.60858	3.88019e-11	5.39781e-09	TRUE	FALSE		0.908	1.49	1.061	0.499	0.436	0.431	0.501		1.153	0.46675	0.404814	-1.30467
ENSMUSG00000052299	Ltn1	listerin E3 ubiquitin protein ligase 1 [Source:MGI Symbol;Acc:MGI:1926163]	498.751	500.755	499.896	-0.587915	0.173451	-3.38952	0.000700157	0.0079005	TRUE	FALSE		1.175	1.12	1.141	1.078	0.913	0.95	0.779		1.14533	0.93	0.811991	-0.300465
ENSMUSG00000046573	Lyrm4	LYR motif containing 4 [Source:MGI Symbol;Acc:MGI:2683538]	1168.85	1257.98	1219.78	-0.516153	0.156129	-3.30595	0.000946564	0.00975358	TRUE	FALSE		1.026	1.245	1.137	1.027	0.855	0.647	1.097		1.136	0.9065	0.797975	-0.325584
ENSMUSG00000053647	Gper1	G protein-coupled estrogen receptor 1 [Source:MGI Symbol;Acc:MGI:1924104]	28.7192	23.9796	26.0109	-2.06357	0.420854	-4.90329	9.42428e-07	4.00833e-05	TRUE	FALSE		1.039	1.417	0.946	0.258	0.123	0.289	0.097		1.134	0.19175	0.169092	-2.56412
ENSMUSG00000049969	Plekhf2	pleckstrin homology domain containing, family F (with FYVE domain) member 2 [Source:MGI Symbol;Acc:MGI:1919051]	134.571	167.263	153.252	-0.943784	0.251371	-3.75454	0.000173657	0.0028698	TRUE	FALSE		1.061	1.066	1.265	0.436	0.666	0.894	0.903		1.13067	0.72475	0.640994	-0.641618
ENSMUSG00000044201	Cdc25c	cell division cycle 25C [Source:MGI Symbol;Acc:MGI:88350]	148.667	116.211	130.121	-1.22502	0.293787	-4.16976	3.04923e-05	0.000724963	TRUE	FALSE		0.563	1.522	1.289	0.583	0.426	0.554	0.512		1.12467	0.51875	0.461248	-1.11639
ENSMUSG00000035357	Pdzrn3	PDZ domain containing RING finger 3 [Source:MGI Symbol;Acc:MGI:1933157]	1763.73	1996.92	1896.98	-0.767892	0.154243	-4.97847	6.40887e-07	2.89182e-05	TRUE	FALSE		0.979	1.221	1.139	0.574	1.011	0.844	0.812		1.113	0.81025	0.727987	-0.458015
ENSMUSG00000052504	Epha3	Eph receptor A3 [Source:MGI Symbol;Acc:MGI:99612]	2977.32	2815.19	2884.67	-0.511927	0.143036	-3.579	0.000344915	0.00484884	TRUE	FALSE		1.085	1.307	0.945	0.87	0.995	1.052	0.948		1.11233	0.96625	0.868669	-0.203121
ENSMUSG00000030930	Chst15	carbohydrate (N-acetylgalactosamine 4-sulfate 6-O) sulfotransferase 15 [Source:MGI Symbol;Acc:MGI:1924840]	633.153	746.358	697.842	-0.618263	0.174853	-3.53591	0.000406374	0.0054096	TRUE	FALSE		1.26	0.95	1.102	0.818	0.918	0.983	0.826		1.104	0.88625	0.802763	-0.316955
ENSMUSG00000032939	Nup93	nucleoporin 93 [Source:MGI Symbol;Acc:MGI:1919055]	811.079	839.028	827.05	-0.750924	0.159318	-4.71338	2.43645e-06	9.00603e-05	TRUE	FALSE		0.94	1.257	1.115	0.655	0.797	0.853	0.92		1.104	0.80625	0.730299	-0.453441
ENSMUSG00000022246	Rai14	retinoic acid induced 14 [Source:MGI Symbol;Acc:MGI:1922896]	1004.25	1098.47	1058.09	-1.05048	0.155801	-6.74244	1.55749e-11	2.31728e-09	TRUE	FALSE		0.933	1.25	1.127	0.658	0.61	0.399	0.703		1.10333	0.5925	0.537009	-0.896982
ENSMUSG00000031004	Mki67	antigen identified by monoclonal antibody Ki 67 [Source:MGI Symbol;Acc:MGI:106035]	186.412	163.913	173.555	-1.47576	0.251605	-5.86537	4.4812e-09	3.83183e-07	TRUE	FALSE		0.659	1.451	1.197	0.446	0.418	0.386	0.459		1.10233	0.42725	0.387587	-1.36741
ENSMUSG00000039354	Smarcal1	SWI/SNF related matrix associated, actin dependent regulator of chromatin, subfamily a-like 1 [Source:MGI Symbol;Acc:MGI:1859183]	409.011	439.621	426.502	-0.588756	0.177856	-3.31029	0.000932003	0.00967881	TRUE	FALSE		0.943	1.122	1.201	0.767	0.797	0.973	1.051		1.08867	0.897	0.823944	-0.279382
ENSMUSG00000005470	Asf1b	anti-silencing function 1B histone chaperone [Source:MGI Symbol;Acc:MGI:1914179]	85.7924	86.229	86.0419	-1.8885	0.290709	-6.49617	8.23886e-11	1.05192e-08	TRUE	FALSE		0.764	1.319	1.132	0.194	0.343	0.349	0.338		1.07167	0.306	0.285537	-1.80825
ENSMUSG00000022360	Atad2	ATPase family, AAA domain containing 2 [Source:MGI Symbol;Acc:MGI:1917722]	319.321	319.207	319.256	-0.704221	0.193536	-3.6387	0.000274016	0.00403789	TRUE	FALSE		0.791	1.297	1.095	0.742	0.885	0.602	0.738		1.061	0.74175	0.699105	-0.51642
ENSMUSG00000024921	Smarca2	SWI/SNF related, matrix associated, actin dependent regulator of chromatin, subfamily a, member 2 [Source:MGI Symbol;Acc:MGI:99603]	1313.47	1512.38	1427.13	-0.598779	0.148818	-4.02357	5.73236e-05	0.00118862	TRUE	FALSE		1.112	0.972	1.081	0.792	0.79	0.903	0.949		1.055	0.8585	0.813744	-0.297353
ENSMUSG00000027253	Lrp4	low density lipoprotein receptor-related protein 4 [Source:MGI Symbol;Acc:MGI:2442252]	377.811	347.002	360.206	-1.41462	0.204236	-6.92639	4.31709e-12	7.52101e-10	TRUE	FALSE		0.688	1.341	1.136	0.453	0.49	0.408	0.417		1.055	0.442	0.418957	-1.25512
ENSMUSG00000027379	Bub1	BUB1, mitotic checkpoint serine/threonine kinase [Source:MGI Symbol;Acc:MGI:1100510]	170.748	156.768	162.76	-2.39649	0.246746	-9.71237	2.6706e-22	2.16446e-19	TRUE	FALSE		0.671	1.374	1.063	0.127	0.229	0.231	0.265		1.036	0.213	0.205598	-2.2821
ENSMUSG00000031207	Msn	moesin [Source:MGI Symbol;Acc:MGI:97167]	441.808	390.274	412.36	-1.86937	0.229388	-8.14939	3.65774e-16	1.33694e-13	TRUE	FALSE		0.662	1.249	1.156	0.374	0.307	0.364	0.224		1.02233	0.31725	0.31032	-1.68817
ENSMUSG00000029778	Adcyap1r1	adenylate cyclase activating polypeptide 1 receptor 1 [Source:MGI Symbol;Acc:MGI:108449]	351.309	398.962	378.539	-0.783148	0.185574	-4.22015	2.44141e-05	0.000607391	TRUE	FALSE		0.961	0.897	1.196	0.594	0.673	1.008	0.785		1.018	0.765	0.751473	-0.412206
ENSMUSG00000012443	Kif11	kinesin family member 11 [Source:MGI Symbol;Acc:MGI:1098231]	264.308	218.831	238.321	-2.15587	0.229593	-9.38997	6.00166e-21	4.14359e-18	TRUE	FALSE		0.702	1.398	0.896	0.248	0.249	0.183	0.258		0.998667	0.2345	0.234813	-2.09042
ENSMUSG00000032254	Kif23	kinesin family member 23 [Source:MGI Symbol;Acc:MGI:1919069]	175.283	149.691	160.659	-1.8254	0.27199	-6.71127	1.92942e-11	2.83199e-09	TRUE	FALSE		0.617	1.281	1.072	0.371	0.264	0.265	0.268		0.99	0.292	0.294949	-1.76146
ENSMUSG00000038736	Nudcd1	NudC domain containing 1 [Source:MGI Symbol;Acc:MGI:1914679]	348.708	405.322	381.059	-0.768251	0.18027	-4.26167	2.02905e-05	0.00052364	TRUE	FALSE		1.003	0.936	1.028	0.724	0.684	0.624	0.702		0.989	0.6835	0.691102	-0.533029
ENSMUSG00000015090	Ptgds	prostaglandin D2 synthase (brain) [Source:MGI Symbol;Acc:MGI:99261]	10.573	19.0115	15.395	-1.90484	0.455251	-4.18416	2.86224e-05	0.000684039	TRUE	FALSE		0.853	0.743	1.317	0.225	0.142	0.037	0.135		0.971	0.13475	0.138774	-2.84919
ENSMUSG00000026429	Ube2t	ubiquitin-conjugating enzyme E2T (putative) [Source:MGI Symbol;Acc:MGI:1914446]	77.5785	59.7617	67.3975	-1.34289	0.350834	-3.82771	0.000129339	0.00226811	TRUE	FALSE		0.751	1.29	0.865	0.608	0.213	0.316	0.448		0.968667	0.39625	0.409067	-1.28959
ENSMUSG00000024044	Epb41l3	erythrocyte membrane protein band 4.1 like 3 [Source:MGI Symbol;Acc:MGI:103008]	975.445	1045.52	1015.49	-0.55917	0.147947	-3.77952	0.000157132	0.00264599	TRUE	FALSE		0.921	0.962	1.021	0.793	0.737	0.816	0.865		0.968	0.80275	0.829287	-0.270056
ENSMUSG00000039055	Eme1	essential meiotic structure-specific endonuclease 1 [Source:MGI Symbol;Acc:MGI:3576783]	52.2556	54.2909	53.4186	-1.19592	0.339809	-3.51939	0.000432545	0.00563064	TRUE	FALSE		0.597	1.071	1.226	0.435	0.456	0.436	0.403		0.964667	0.4325	0.448341	-1.15733
ENSMUSG00000035351	Nup37	nucleoporin 37 [Source:MGI Symbol;Acc:MGI:1919964]	178.187	232.662	209.315	-0.906204	0.213487	-4.24478	2.18809e-05	0.000557979	TRUE	FALSE		0.786	0.913	1.184	0.497	0.557	0.525	0.806		0.961	0.59625	0.620447	-0.688619
ENSMUSG00000027962	Vcam1	vascular cell adhesion molecule 1 [Source:MGI Symbol;Acc:MGI:98926]	110.063	94.8659	101.379	-1.91921	0.280904	-6.83226	8.35864e-12	1.33174e-09	TRUE	FALSE		0.542	1.272	1.026	0.205	0.299	0.297	0.24		0.946667	0.26025	0.274912	-1.86296
ENSMUSG00000021048	Mthfd1	methylenetetrahydrofolate dehydrogenase (NADP+ dependent), methenyltetrahydrofolate cyclohydrolase, formyltetrahydrofolate synthase [Source:MGI Symbol;Acc:MGI:1342005]	452.101	451.645	451.841	-0.763857	0.175054	-4.36355	1.27966e-05	0.000357634	TRUE	FALSE		0.943	0.947	0.935	0.741	0.583	0.761	0.668		0.941667	0.68825	0.730885	-0.452284
ENSMUSG00000030428	Ttyh1	tweety homolog 1 (Drosophila) [Source:MGI Symbol;Acc:MGI:1889007]	114.345	105.763	109.441	-1.00283	0.280862	-3.57053	0.000356265	0.00495977	TRUE	FALSE		0.783	0.959	1.066	0.711	0.423	0.622	0.431		0.936	0.54675	0.584135	-0.775627
ENSMUSG00000028364	Tnc	tenascin C [Source:MGI Symbol;Acc:MGI:101922]	462.02	362.384	405.085	-2.55781	0.238975	-10.7032	9.82857e-27	1.30867e-23	TRUE	FALSE		0.431	1.324	1.045	0.143	0.13	0.181	0.205		0.933333	0.16475	0.176518	-2.50211
ENSMUSG00000031095	Cul4b	cullin 4B [Source:MGI Symbol;Acc:MGI:1919834]	277.882	314.964	299.072	-0.683234	0.19576	-3.49015	0.000482746	0.00607211	TRUE	FALSE		0.911	0.919	0.953	0.65	0.767	0.68	0.663		0.927667	0.69	0.743802	-0.42701
ENSMUSG00000048922	Cdca2	cell division cycle associated 2 [Source:MGI Symbol;Acc:MGI:1919787]	240.536	158.523	193.672	-2.086	0.268083	-7.78117	7.18559e-15	2.19584e-12	TRUE	FALSE		0.563	1.461	0.755	0.224	0.19	0.229	0.252		0.926333	0.22375	0.241544	-2.04964
ENSMUSG00000038332	Sesn1	sestrin 1 [Source:MGI Symbol;Acc:MGI:2155278]	550.942	618.897	589.774	-1.14207	0.168145	-6.79216	1.10467e-11	1.70183e-09	TRUE	FALSE		0.852	0.968	0.909	0.42	0.536	0.511	0.519		0.909667	0.4965	0.545804	-0.873544
ENSMUSG00000023022	Lima1	LIM domain and actin binding 1 [Source:MGI Symbol;Acc:MGI:1920992]	574.964	702.911	648.077	-0.709991	0.163743	-4.336	1.45098e-05	0.000396594	TRUE	FALSE		0.704	0.889	1.129	0.565	0.707	0.591	0.727		0.907333	0.6475	0.71363	-0.486752
ENSMUSG00000010505	Myt1	myelin transcription factor 1 [Source:MGI Symbol;Acc:MGI:1100535]	409.469	404.623	406.7	-0.881886	0.189068	-4.66438	3.09552e-06	0.000110068	TRUE	FALSE		0.676	1.051	0.981	0.596	0.605	0.512	0.55		0.902667	0.56575	0.626754	-0.674029
ENSMUSG00000049409	Prokr1	prokineticin receptor 1 [Source:MGI Symbol;Acc:MGI:1929676]	63.1575	63.7197	63.4787	-1.41231	0.327601	-4.31108	1.62457e-05	0.000435109	TRUE	FALSE		0.753	1.027	0.818	0.185	0.477	0.493	0.26		0.866	0.35375	0.408487	-1.29164
ENSMUSG00000050697	Prkaa1	protein kinase, AMP-activated, alpha 1 catalytic subunit [Source:MGI Symbol;Acc:MGI:2145955]	241.766	233.429	237.002	-0.809493	0.21466	-3.77105	0.000162563	0.00273002	TRUE	FALSE		0.835	0.884	0.857	0.702	0.593	0.63	0.445		0.858667	0.5925	0.690023	-0.535283
ENSMUSG00000023348	Trip6	thyroid hormone receptor interactor 6 [Source:MGI Symbol;Acc:MGI:1343458]	22.0854	20.9194	21.4191	-1.6529	0.438368	-3.77058	0.000162867	0.00273268	TRUE	FALSE		0.581	1.207	0.785	0.095	0.16	0.129	0.428		0.857667	0.203	0.236689	-2.07894
ENSMUSG00000040183	Ankrd6	ankyrin repeat domain 6 [Source:MGI Symbol;Acc:MGI:2154278]	891.372	1032	971.734	-0.530036	0.155044	-3.41863	0.000629381	0.0073281	TRUE	FALSE		0.748	0.927	0.884	0.657	0.878	0.506	0.666		0.853	0.67675	0.793376	-0.333923
ENSMUSG00000000278	Scpep1	serine carboxypeptidase 1 [Source:MGI Symbol;Acc:MGI:1921867]	174.155	178.318	176.534	-1.10815	0.231079	-4.79553	1.62247e-06	6.32728e-05	TRUE	FALSE		0.672	0.968	0.909	0.42	0.408	0.474	0.546		0.849667	0.462	0.543743	-0.879004
ENSMUSG00000039509	Nup133	nucleoporin 133 [Source:MGI Symbol;Acc:MGI:2442620]	306.735	350.845	331.941	-0.722444	0.201102	-3.59242	0.000327621	0.00464425	TRUE	FALSE		0.774	0.679	1.085	0.604	0.576	0.811	0.567		0.846	0.6395	0.75591	-0.403713
ENSMUSG00000046402	Rbp1	retinol binding protein 1, cellular [Source:MGI Symbol;Acc:MGI:97876]	146.669	125.349	134.486	-1.00009	0.28717	-3.48258	0.000496601	0.00616272	TRUE	FALSE		0.628	1.011	0.89	0.604	0.596	0.502	0.23		0.843	0.483	0.572954	-0.803509
ENSMUSG00000028005	Gucy1b3	guanylate cyclase 1, soluble, beta 3 [Source:MGI Symbol;Acc:MGI:1860604]	236.522	266.083	253.414	-0.985171	0.223781	-4.40239	1.07067e-05	0.000306579	TRUE	FALSE		0.936	0.657	0.934	0.51	0.508	0.799	0.37		0.842333	0.54675	0.64909	-0.62351
ENSMUSG00000027878	Notch2	notch 2 [Source:MGI Symbol;Acc:MGI:97364]	846.5	720.04	774.237	-0.981142	0.187147	-5.24264	1.58299e-07	8.60306e-06	TRUE	FALSE		0.477	1.154	0.881	0.445	0.511	0.457	0.499		0.837333	0.478	0.57086	-0.808791
ENSMUSG00000046818	Ddit4l	DNA-damage-inducible transcript 4-like [Source:MGI Symbol;Acc:MGI:1920534]	28.2158	26.6442	27.3177	-2.04028	0.418678	-4.87314	1.09836e-06	4.5907e-05	TRUE	FALSE		0.668	0.98	0.825	0.223	0.141	0.127	0.067		0.824333	0.1395	0.169228	-2.56296
ENSMUSG00000026669	Mcm10	minichromosome maintenance deficient 10 (S. cerevisiae) [Source:MGI Symbol;Acc:MGI:1917274]	139.155	121.644	129.149	-0.933661	0.252465	-3.69818	0.000217151	0.00339875	TRUE	FALSE		0.531	1.128	0.774	0.371	0.552	0.503	0.519		0.811	0.48625	0.599568	-0.738004
ENSMUSG00000033720	Sfxn5	sideroflexin 5 [Source:MGI Symbol;Acc:MGI:2137681]	712.558	758.743	738.95	-0.620938	0.155585	-3.99099	6.5798e-05	0.00132743	TRUE	FALSE		0.642	0.877	0.863	0.52	0.659	0.647	0.689		0.794	0.62875	0.791877	-0.336653
ENSMUSG00000026605	Cenpf	centromere protein F [Source:MGI Symbol;Acc:MGI:1313302]	251.795	187.261	214.918	-1.66624	0.26069	-6.39164	1.64113e-10	1.96105e-08	TRUE	FALSE		0.552	1.093	0.721	0.376	0.298	0.26	0.152		0.788667	0.2715	0.344252	-1.53846
ENSMUSG00000020176	Grb10	growth factor receptor bound protein 10 [Source:MGI Symbol;Acc:MGI:103232]	573.776	533.739	550.898	-1.12885	0.172314	-6.55109	5.71201e-11	7.55161e-09	TRUE	FALSE		0.634	1.067	0.662	0.398	0.499	0.273	0.411		0.787667	0.39525	0.501799	-0.99482
ENSMUSG00000040274	Cdk6	cyclin-dependent kinase 6 [Source:MGI Symbol;Acc:MGI:1277162]	957.635	929.754	941.703	-1.13788	0.162995	-6.98108	2.92913e-12	5.25019e-10	TRUE	FALSE		0.493	1.066	0.783	0.364	0.497	0.21	0.428		0.780667	0.37475	0.480038	-1.05878
ENSMUSG00000041219	Arhgap11a	Rho GTPase activating protein 11A [Source:MGI Symbol;Acc:MGI:2444300]	76.7695	91.59	85.2384	-1.07473	0.30406	-3.5346	0.000408399	0.00543008	TRUE	FALSE		0.518	0.731	1.08	0.472	0.399	0.32	0.368		0.776333	0.38975	0.50204	-0.994127
ENSMUSG00000022385	Gtse1	G two S phase expressed protein 1 [Source:MGI Symbol;Acc:MGI:1352755]	92.0659	78.0101	84.034	-1.16511	0.288441	-4.03933	5.3604e-05	0.00112507	TRUE	FALSE		0.767	0.946	0.601	0.436	0.378	0.457	0.295		0.771333	0.3915	0.507563	-0.978342
ENSMUSG00000019988	Nedd1	neural precursor cell expressed, developmentally down-regulated gene 1 [Source:MGI Symbol;Acc:MGI:97293]	211.774	183.97	195.886	-0.99255	0.264827	-3.74792	0.000178306	0.00292074	TRUE	FALSE		0.563	0.878	0.87	0.649	0.308	0.402	0.432		0.770333	0.44775	0.581242	-0.782789
ENSMUSG00000031755	Bbs2	Bardet-Biedl syndrome 2 (human) [Source:MGI Symbol;Acc:MGI:2135267]	164.49	179.918	173.306	-0.77448	0.227011	-3.41164	0.000645742	0.00745342	TRUE	FALSE		0.735	0.746	0.83	0.54	0.542	0.57	0.498		0.770333	0.5375	0.69775	-0.519218
ENSMUSG00000024908	Ppp6r3	protein phosphatase 6, regulatory subunit 3 [Source:MGI Symbol;Acc:MGI:1921807]	696.056	755.334	729.929	-0.562641	0.160488	-3.50581	0.000455223	0.00581618	TRUE	FALSE		0.768	0.77	0.768	0.613	0.578	0.634	0.71		0.768667	0.63375	0.82448	-0.278444
ENSMUSG00000037474	Dtl	denticleless E3 ubiquitin protein ligase [Source:MGI Symbol;Acc:MGI:1924093]	162.566	149.736	155.235	-2.06949	0.241906	-8.55492	1.17948e-17	5.49666e-15	TRUE	FALSE		0.533	0.982	0.763	0.161	0.234	0.208	0.183		0.759333	0.1965	0.25878	-1.9502
ENSMUSG00000027883	Gpsm2	G-protein signalling modulator 2 (AGS3-like, C. elegans) [Source:MGI Symbol;Acc:MGI:1923373]	220.363	197.905	207.53	-1.23623	0.242137	-5.10547	3.29975e-07	1.61023e-05	TRUE	FALSE		0.472	0.985	0.799	0.337	0.303	0.341	0.455		0.752	0.359	0.477394	-1.06675
ENSMUSG00000027018	Hat1	histone aminotransferase 1 [Source:MGI Symbol;Acc:MGI:96013]	223.073	255.006	241.32	-1.25945	0.205366	-6.13271	8.63972e-10	8.61246e-08	TRUE	FALSE		0.634	0.774	0.764	0.322	0.359	0.318	0.395		0.724	0.3485	0.481354	-1.05483
ENSMUSG00000023963	Cyp39a1	cytochrome P450, family 39, subfamily a, polypeptide 1 [Source:MGI Symbol;Acc:MGI:1927096]	333.027	307.781	318.6	-2.14076	0.210381	-10.1756	2.54728e-24	2.79317e-21	TRUE	FALSE		0.51	0.935	0.716	0.189	0.185	0.128	0.191		0.720333	0.17325	0.240514	-2.05581
ENSMUSG00000072082	Ccnf	cyclin F [Source:MGI Symbol;Acc:MGI:102551]	144.829	118.485	129.775	-1.1215	0.271651	-4.12847	3.65178e-05	0.000829146	TRUE	FALSE		0.426	1.039	0.689	0.357	0.358	0.286	0.417		0.718	0.3545	0.493733	-1.0182
ENSMUSG00000025001	Hells	helicase, lymphoid specific [Source:MGI Symbol;Acc:MGI:106209]	186.899	164.573	174.141	-1.42948	0.233222	-6.12926	8.82875e-10	8.70776e-08	TRUE	FALSE		0.477	0.946	0.712	0.243	0.317	0.332	0.315		0.711667	0.30175	0.424005	-1.23785
ENSMUSG00000028640	Tfap2c	transcription factor AP-2, gamma [Source:MGI Symbol;Acc:MGI:106032]	37.1234	31.7894	34.0754	-1.74573	0.399957	-4.3648	1.2724e-05	0.000356139	TRUE	FALSE		0.468	0.927	0.73	0.183	0.095	0.203	0.25		0.708333	0.18275	0.258	-1.95456
ENSMUSG00000029086	Prom1	prominin 1 [Source:MGI Symbol;Acc:MGI:1100886]	467.863	501.54	487.107	-1.26776	0.178763	-7.09183	1.32348e-12	2.49202e-10	TRUE	FALSE		0.536	0.767	0.813	0.318	0.381	0.362	0.323		0.705333	0.346	0.490548	-1.02753
ENSMUSG00000026683	Nuf2	NUF2, NDC80 kinetochore complex component, homolog (S. cerevisiae) [Source:MGI Symbol;Acc:MGI:1914227]	118.957	130.589	125.604	-1.93329	0.29293	-6.59983	4.11617e-11	5.64188e-09	TRUE	FALSE		0.628	0.85	0.599	0.157	0.156	0.109	0.337		0.692333	0.18975	0.274073	-1.86737
ENSMUSG00000075254	Heg1	heart development protein with EGF-like domains 1 [Source:MGI Symbol;Acc:MGI:1924696]	471.011	429.485	447.282	-0.777047	0.207038	-3.75315	0.000174624	0.00288068	TRUE	FALSE		0.559	0.772	0.742	0.525	0.586	0.579	0.311		0.691	0.50025	0.723951	-0.466036
ENSMUSG00000033713	Foxn3	forkhead box N3 [Source:MGI Symbol;Acc:MGI:1918625]	1348.05	1396.01	1375.46	-0.588473	0.142915	-4.11763	3.82786e-05	0.000857634	TRUE	FALSE		0.66	0.747	0.664	0.525	0.584	0.565	0.561		0.690333	0.55875	0.809392	-0.30509
ENSMUSG00000027699	Ect2	ect2 oncogene [Source:MGI Symbol;Acc:MGI:95281]	255.045	219.536	234.754	-1.38151	0.240735	-5.7387	9.54062e-09	7.47255e-07	TRUE	FALSE		0.405	0.923	0.732	0.318	0.282	0.229	0.303		0.686667	0.283	0.412136	-1.27881
ENSMUSG00000003190	Bcl2l12	BCL2-like 12 (proline rich) [Source:MGI Symbol;Acc:MGI:1922986]	27.3666	27.8101	27.6201	-1.45445	0.42739	-3.4031	0.000666266	0.00761488	TRUE	FALSE		0.334	0.683	1.021	0.22	0.19	0.31	0.06		0.679333	0.195	0.287046	-1.80065
ENSMUSG00000025154	Arhgap19	Rho GTPase activating protein 19 [Source:MGI Symbol;Acc:MGI:1918335]	195.699	144.315	166.337	-0.956398	0.255869	-3.73784	0.000185609	0.0030165	TRUE	FALSE		0.532	0.919	0.56	0.401	0.316	0.547	0.414		0.670333	0.4195	0.625808	-0.676208
ENSMUSG00000015880	Ncapg	non-SMC condensin I complex, subunit G [Source:MGI Symbol;Acc:MGI:1930197]	118.115	103.518	109.774	-1.95185	0.2856	-6.83422	8.24527e-12	1.325e-09	TRUE	FALSE		0.448	0.923	0.624	0.142	0.168	0.148	0.251		0.665	0.17725	0.266541	-1.90757
ENSMUSG00000026185	Igfbp5	insulin-like growth factor binding protein 5 [Source:MGI Symbol;Acc:MGI:96440]	66.1702	62.0503	63.816	-1.46701	0.330509	-4.43863	9.05337e-06	0.000267032	TRUE	FALSE		0.305	0.891	0.767	0.23	0.325	0.123	0.227		0.654333	0.22625	0.345772	-1.53211
ENSMUSG00000021716	Srek1ip1	splicing regulatory glutamine/lysine-rich protein 1interacting protein 1 [Source:MGI Symbol;Acc:MGI:1914538]	206.71	229.15	219.533	-0.726109	0.2138	-3.39621	0.000683271	0.00776637	TRUE	FALSE		0.526	0.652	0.752	0.481	0.445	0.394	0.478		0.643333	0.4495	0.698705	-0.517245
ENSMUSG00000057110	Cntrl	centriolin [Source:MGI Symbol;Acc:MGI:1889576]	341.835	288.005	311.075	-0.853955	0.205274	-4.16007	3.18151e-05	0.000747876	TRUE	FALSE		0.514	0.802	0.575	0.461	0.401	0.416	0.371		0.630333	0.41225	0.654019	-0.612595
ENSMUSG00000021965	Ska3	spindle and kinetochore associated complex subunit 3 [Source:MGI Symbol;Acc:MGI:3041235]	78.0181	68.1586	72.3841	-1.43373	0.30318	-4.72898	2.25648e-06	8.44641e-05	TRUE	FALSE		0.502	0.862	0.502	0.222	0.315	0.2	0.219		0.622	0.239	0.384244	-1.3799
ENSMUSG00000072946	Ptgr2	prostaglandin reductase 2 [Source:MGI Symbol;Acc:MGI:1916372]	125.3	135.475	131.114	-0.935296	0.283564	-3.29835	0.000972533	0.00993369	TRUE	FALSE		0.51	0.476	0.878	0.446	0.317	0.535	0.244		0.621333	0.3855	0.62044	-0.688637
ENSMUSG00000031990	Jam3	junction adhesion molecule 3 [Source:MGI Symbol;Acc:MGI:1933825]	239.226	268.721	256.08	-0.779011	0.210067	-3.70839	0.000208577	0.00328941	TRUE	FALSE		0.531	0.65	0.644	0.388	0.36	0.373	0.557		0.608333	0.4195	0.689589	-0.536191
ENSMUSG00000016386	Mpped2	metallophosphoesterase domain containing 2 [Source:MGI Symbol;Acc:MGI:1924265]	620.106	793.505	719.191	-1.02302	0.164416	-6.22212	4.90495e-10	5.22475e-08	TRUE	FALSE		0.532	0.537	0.742	0.307	0.363	0.375	0.383		0.603667	0.357	0.591386	-0.757828
ENSMUSG00000036223	Ska1	spindle and kinetochore associated complex subunit 1 [Source:MGI Symbol;Acc:MGI:1913718]	30.837	44.4549	38.6187	-1.9805	0.37251	-5.31665	1.05693e-07	6.02516e-06	TRUE	FALSE		0.462	0.588	0.756	0.12	0.152	0.068	0.18		0.602	0.13	0.215947	-2.21125
ENSMUSG00000052446	Zfp961	zinc finger protein 961 [Source:MGI Symbol;Acc:MGI:3583954]	199.508	174.194	185.043	-0.796116	0.228007	-3.49164	0.000480072	0.00604669	TRUE	FALSE		0.511	0.735	0.557	0.446	0.465	0.433	0.304		0.601	0.412	0.685524	-0.544721
ENSMUSG00000021707	Dhfr	dihydrofolate reductase [Source:MGI Symbol;Acc:MGI:94890]	134.768	132.841	133.667	-1.11943	0.25185	-4.44483	8.79627e-06	0.000261517	TRUE	FALSE		0.471	0.726	0.6	0.306	0.408	0.278	0.244		0.599	0.309	0.51586	-0.954949
ENSMUSG00000031756	Cenpn	centromere protein N [Source:MGI Symbol;Acc:MGI:1919405]	63.7492	63.6136	63.6717	-1.70479	0.366345	-4.65352	3.26315e-06	0.000114988	TRUE	FALSE		0.323	0.651	0.817	0.296	0.135	0.111	0.126		0.597	0.167	0.279732	-1.83788
ENSMUSG00000019917	2016-09-10	septin 10 [Source:MGI Symbol;Acc:MGI:1918110]	233.262	229.707	231.23	-1.03865	0.214072	-4.85188	1.22295e-06	5.04357e-05	TRUE	FALSE		0.51	0.666	0.614	0.382	0.326	0.326	0.321		0.596667	0.33875	0.567737	-0.816704
ENSMUSG00000020493	Prr11	proline rich 11 [Source:MGI Symbol;Acc:MGI:2444496]	70.8787	68.297	69.4034	-1.44644	0.308007	-4.69612	2.65147e-06	9.6914e-05	TRUE	FALSE		0.335	0.773	0.679	0.123	0.263	0.275	0.277		0.595667	0.2345	0.393677	-1.34492
ENSMUSG00000051022	Hs3st1	heparan sulfate (glucosamine) 3-O-sulfotransferase 1 [Source:MGI Symbol;Acc:MGI:1201606]	476.954	567.66	528.786	-1.47226	0.180536	-8.15491	3.4944e-16	1.30278e-13	TRUE	FALSE		0.512	0.515	0.744	0.192	0.254	0.449	0.257		0.590333	0.288	0.48786	-1.03546
ENSMUSG00000000028	Cdc45	cell division cycle 45 [Source:MGI Symbol;Acc:MGI:1338073]	119.249	108.623	113.177	-1.31151	0.27891	-4.70227	2.57283e-06	9.44098e-05	TRUE	FALSE		0.429	0.749	0.579	0.304	0.229	0.19	0.294		0.585667	0.25425	0.434121	-1.20383
ENSMUSG00000024782	Ak3	adenylate kinase 3 [Source:MGI Symbol;Acc:MGI:1860835]	91.9217	112.394	103.62	-1.0867	0.269107	-4.03818	5.38674e-05	0.00112825	TRUE	FALSE		0.588	0.526	0.638	0.326	0.315	0.311	0.291		0.584	0.31075	0.532106	-0.910214
ENSMUSG00000022899	Slc15a2	solute carrier family 15 (H+/peptide transporter), member 2 [Source:MGI Symbol;Acc:MGI:1890457]	144.051	128.856	135.368	-0.976828	0.275302	-3.5482	0.000387872	0.00525842	TRUE	FALSE		0.357	0.818	0.572	0.371	0.525	0.176	0.201		0.582333	0.31825	0.546508	-0.871685
ENSMUSG00000027331	Knstrn	kinetochore-localized astrin/SPAG5 binding [Source:MGI Symbol;Acc:MGI:1289298]	130.605	118.256	123.549	-2.02504	0.289863	-6.98618	2.82476e-12	5.11228e-10	TRUE	FALSE		0.421	0.696	0.62	0.184	0.095	0.177	0.153		0.579	0.15225	0.262953	-1.92712
ENSMUSG00000029804	Herc3	hect domain and RLD 3 [Source:MGI Symbol;Acc:MGI:1921248]	360.373	428.349	399.217	-0.640991	0.187135	-3.42529	0.000614147	0.00720019	TRUE	FALSE		0.674	0.406	0.646	0.439	0.356	0.618	0.477		0.575333	0.4725	0.821263	-0.284084
ENSMUSG00000028689	Ccdc163	coiled-coil domain containing 163 [Source:MGI Symbol;Acc:MGI:1915644]	163.923	182.656	174.628	-0.805512	0.226664	-3.55377	0.000379748	0.005186	TRUE	FALSE		0.424	0.652	0.645	0.323	0.388	0.323	0.476		0.573667	0.3775	0.658048	-0.603736
ENSMUSG00000019528	Gyg	glycogenin [Source:MGI Symbol;Acc:MGI:1351614]	120.002	120.116	120.067	-1.17825	0.289796	-4.06579	4.78692e-05	0.00103399	TRUE	FALSE		0.452	0.581	0.679	0.411	0.275	0.243	0.184		0.570667	0.27825	0.487588	-1.03627
ENSMUSG00000048015	Neurod4	neurogenic differentiation 4 [Source:MGI Symbol;Acc:MGI:108055]	30.2637	33.3632	32.0348	-2.2537	0.42031	-5.362	8.23071e-08	4.7683e-06	TRUE	FALSE		0.507	0.532	0.617	0.074	0.047	0.202	0		0.552	0.08075	0.146286	-2.77313
ENSMUSG00000051220	Ercc6l	excision repair cross-complementing rodent repair deficiency complementation group 6 like [Source:MGI Symbol;Acc:MGI:2654144]	48.8251	45.1753	46.7395	-1.62618	0.387979	-4.19142	2.77213e-05	0.000668502	TRUE	FALSE		0.387	0.726	0.516	0.02	0.148	0.262	0.25		0.543	0.17	0.313076	-1.67542
ENSMUSG00000045328	Cenpe	centromere protein E [Source:MGI Symbol;Acc:MGI:1098230]	194.998	183.366	188.351	-1.69126	0.227351	-7.43897	1.01477e-13	2.45666e-11	TRUE	FALSE		0.449	0.688	0.487	0.201	0.213	0.142	0.17		0.541333	0.1815	0.335283	-1.57655
ENSMUSG00000047534	Mis18bp1	MIS18 binding protein 1 [Source:MGI Symbol;Acc:MGI:2145099]	145.93	123.508	133.117	-1.26675	0.280086	-4.52273	6.10471e-06	0.000192551	TRUE	FALSE		0.37	0.752	0.496	0.271	0.203	0.172	0.317		0.539333	0.24075	0.446384	-1.16364
ENSMUSG00000024039	Cbs	cystathionine beta-synthase [Source:MGI Symbol;Acc:MGI:88285]	87.8699	71.7749	78.6727	-1.38258	0.309713	-4.46405	8.0425e-06	0.000242589	TRUE	FALSE		0.337	0.709	0.529	0.165	0.31	0.298	0.11		0.525	0.22075	0.420476	-1.2499
ENSMUSG00000026893	Gca	grancalcin [Source:MGI Symbol;Acc:MGI:1918521]	90.9855	81.0031	85.2813	-1.92152	0.294742	-6.51932	7.06246e-11	9.14246e-09	TRUE	FALSE		0.344	0.65	0.577	0.111	0.15	0.225	0.114		0.523667	0.15	0.286442	-1.80369
ENSMUSG00000026335	Pam	peptidylglycine alpha-amidating monooxygenase [Source:MGI Symbol;Acc:MGI:97475]	960.101	1053.38	1013.41	-1.26804	0.1753	-7.23355	4.70521e-13	9.69818e-11	TRUE	FALSE		0.41	0.614	0.53	0.152	0.295	0.288	0.335		0.518	0.2675	0.516409	-0.953413
ENSMUSG00000049313	Sorl1	sortilin-related receptor, LDLR class A repeats-containing [Source:MGI Symbol;Acc:MGI:1202296]	631.354	595.014	610.588	-0.791927	0.174914	-4.52753	5.96781e-06	0.000189194	TRUE	FALSE		0.454	0.595	0.473	0.279	0.354	0.486	0.401		0.507333	0.38	0.749014	-0.416935
ENSMUSG00000022322	Shcbp1	Shc SH2-domain binding protein 1 [Source:MGI Symbol;Acc:MGI:1338802]	130.834	106.512	116.936	-1.93089	0.280414	-6.88586	5.7438e-12	9.56006e-10	TRUE	FALSE		0.329	0.672	0.487	0.148	0.129	0.14	0.124		0.496	0.13525	0.272681	-1.87471
ENSMUSG00000024056	Ndc80	NDC80 homolog, kinetochore complex component (S. cerevisiae) [Source:MGI Symbol;Acc:MGI:1914302]	91.5391	77.6481	83.6014	-1.79853	0.30619	-5.8739	4.2565e-09	3.6734e-07	TRUE	FALSE		0.3	0.67	0.516	0.141	0.133	0.139	0.162		0.495333	0.14375	0.290209	-1.78484
ENSMUSG00000022091	Sorbs3	sorbin and SH3 domain containing 3 [Source:MGI Symbol;Acc:MGI:700013]	65.9672	78.1341	72.9197	-1.87165	0.305253	-6.13149	8.70622e-10	8.63259e-08	TRUE	FALSE		0.356	0.519	0.605	0.094	0.133	0.171	0.166		0.493333	0.141	0.285811	-1.80687
ENSMUSG00000038379	Ttk	Ttk protein kinase [Source:MGI Symbol;Acc:MGI:1194921]	135.692	116.867	124.935	-0.95021	0.277992	-3.41811	0.000630565	0.00732815	TRUE	FALSE		0.32	0.711	0.441	0.259	0.26	0.214	0.383		0.490667	0.279	0.568614	-0.814478
ENSMUSG00000025037	Maoa	monoamine oxidase A [Source:MGI Symbol;Acc:MGI:96915]	234.099	263.378	250.83	-0.695113	0.207498	-3.34998	0.000808178	0.00879979	TRUE	FALSE		0.438	0.51	0.515	0.288	0.353	0.388	0.441		0.487667	0.3675	0.753589	-0.408151
ENSMUSG00000026749	Nek6	NIMA (never in mitosis gene a)-related expressed kinase 6 [Source:MGI Symbol;Acc:MGI:1891638]	241.859	314.128	283.156	-0.957613	0.265636	-3.60499	0.000312169	0.00448349	TRUE	FALSE		0.537	0.478	0.438	0.146	0.267	0.364	0.466		0.484333	0.31075	0.641604	-0.640246
ENSMUSG00000064289	Tank	TRAF family member-associated Nf-kappa B activator [Source:MGI Symbol;Acc:MGI:107676]	262.32	279.066	271.889	-0.69605	0.20923	-3.32672	0.000878735	0.00931769	TRUE	FALSE		0.462	0.425	0.565	0.47	0.281	0.335	0.341		0.484	0.35675	0.737087	-0.440094
ENSMUSG00000008540	Mgst1	microsomal glutathione S-transferase 1 [Source:MGI Symbol;Acc:MGI:1913850]	44.4351	48.9817	47.0331	-1.23662	0.370442	-3.33824	0.000843117	0.00906375	TRUE	FALSE		0.294	0.537	0.581	0.256	0.116	0.097	0.344		0.470667	0.20325	0.431834	-1.21145
ENSMUSG00000021714	Cenpk	centromere protein K [Source:MGI Symbol;Acc:MGI:1926210]	62.295	51.7841	56.2888	-1.33707	0.365381	-3.65937	0.000252837	0.00381672	TRUE	FALSE		0.246	0.596	0.541	0.254	0.115	0.142	0.208		0.461	0.17975	0.389913	-1.35877
ENSMUSG00000025862	Stag2	stromal antigen 2 [Source:MGI Symbol;Acc:MGI:1098583]	427.517	476.011	455.228	-0.614247	0.179206	-3.42761	0.000608925	0.00714796	TRUE	FALSE		0.417	0.485	0.475	0.298	0.362	0.375	0.431		0.459	0.3665	0.798475	-0.324681
ENSMUSG00000033767	D930015E06Rik	RIKEN cDNA D930015E06 gene [Source:MGI Symbol;Acc:MGI:2443399]	455.413	548.302	508.492	-0.645546	0.190334	-3.39165	0.000694742	0.00785366	TRUE	FALSE		0.483	0.41	0.481	0.272	0.369	0.441	0.399		0.458	0.37025	0.808406	-0.306848
ENSMUSG00000045932	Ifit2	interferon-induced protein with tetratricopeptide repeats 2 [Source:MGI Symbol;Acc:MGI:99449]	66.8945	76.8705	72.595	-1.25704	0.312528	-4.02215	5.7669e-05	0.00119425	TRUE	FALSE		0.527	0.395	0.45	0.297	0.203	0.204	0.123		0.457333	0.20675	0.452077	-1.14536
ENSMUSG00000025925	Terf1	telomeric repeat binding factor 1 [Source:MGI Symbol;Acc:MGI:109634]	98.1502	133.214	118.187	-0.848529	0.256564	-3.30728	0.000942082	0.00974007	TRUE	FALSE		0.447	0.434	0.453	0.289	0.332	0.143	0.323		0.444667	0.27175	0.611132	-0.710444
ENSMUSG00000015839	Nfe2l2	nuclear factor, erythroid derived 2, like 2 [Source:MGI Symbol;Acc:MGI:108420]	81.2032	64.9778	71.9315	-1.65105	0.358531	-4.60504	4.12383e-06	0.000140792	TRUE	FALSE		0.305	0.527	0.499	0.252	0.085	0.147	0.078		0.443667	0.1405	0.316679	-1.65891
ENSMUSG00000007097	Atp1a2	ATPase, Na+/K+ transporting, alpha 2 polypeptide [Source:MGI Symbol;Acc:MGI:88106]	72.4832	65.6699	68.5899	-1.2139	0.348257	-3.48565	0.00049094	0.00611812	TRUE	FALSE		0.167	0.559	0.566	0.216	0.227	0.125	0.146		0.430667	0.1785	0.414474	-1.27065
ENSMUSG00000037242	Clic4	chloride intracellular channel 4 (mitochondrial) [Source:MGI Symbol;Acc:MGI:1352754]	180.402	185.524	183.329	-0.791726	0.223089	-3.54893	0.0003868	0.0052477	TRUE	FALSE		0.384	0.448	0.443	0.268	0.318	0.345	0.265		0.425	0.299	0.703529	-0.507317
ENSMUSG00000040138	Ndp	Norrie disease (pseudoglioma) (human) [Source:MGI Symbol;Acc:MGI:102570]	63.0136	74.9733	69.8477	-1.15613	0.329	-3.51407	0.0004413	0.00570242	TRUE	FALSE		0.312	0.339	0.619	0.291	0.105	0.205	0.224		0.423333	0.20625	0.487205	-1.0374
ENSMUSG00000030986	Dhx32	DEAH (Asp-Glu-Ala-His) box polypeptide 32 [Source:MGI Symbol;Acc:MGI:2141813]	151.395	164.319	158.78	-1.35465	0.264528	-5.12101	3.03911e-07	1.5067e-05	TRUE	FALSE		0.3	0.429	0.538	0.214	0.195	0.182	0.135		0.422333	0.1815	0.429755	-1.21841
ENSMUSG00000048490	Nrip1	nuclear receptor interacting protein 1 [Source:MGI Symbol;Acc:MGI:1315213]	225.857	267.345	249.564	-1.11418	0.265361	-4.19875	2.68396e-05	0.000653155	TRUE	FALSE		0.453	0.266	0.535	0.184	0.237	0.489	0.128		0.418	0.2595	0.620813	-0.687768
ENSMUSG00000044968	Napepld	N-acyl phosphatidylethanolamine phospholipase D [Source:MGI Symbol;Acc:MGI:2140885]	101.449	92.8165	96.5161	-1.4417	0.275754	-5.22823	1.71143e-07	9.14121e-06	TRUE	FALSE		0.305	0.539	0.405	0.132	0.21	0.187	0.147		0.416333	0.169	0.405925	-1.30072
ENSMUSG00000001517	Foxm1	forkhead box M1 [Source:MGI Symbol;Acc:MGI:1347487]	30.331	30.3579	30.3464	-1.4401	0.412144	-3.49417	0.000475546	0.00600873	TRUE	FALSE		0.275	0.429	0.529	0.102	0.159	0.232	0.034		0.411	0.13175	0.32056	-1.64134
ENSMUSG00000037628	Cdkn3	cyclin-dependent kinase inhibitor 3 [Source:MGI Symbol;Acc:MGI:1919641]	25.686	24.1783	24.8245	-1.42639	0.422575	-3.37546	0.000736929	0.00819636	TRUE	FALSE		0.157	0.508	0.566	0.123	0.104	0.122	0.144		0.410333	0.12325	0.300366	-1.73521
ENSMUSG00000028194	Ddah1	dimethylarginine dimethylaminohydrolase 1 [Source:MGI Symbol;Acc:MGI:1916469]	318.964	285.557	299.874	-1.85102	0.237182	-7.80421	5.98741e-15	1.86019e-12	TRUE	FALSE		0.189	0.531	0.493	0.114	0.121	0.105	0.123		0.404333	0.11575	0.286274	-1.80453
ENSMUSG00000052512	Nav2	neuron navigator 2 [Source:MGI Symbol;Acc:MGI:2183691]	2258.88	2241.76	2249.1	-0.664237	0.143143	-4.64037	3.47778e-06	0.000121058	TRUE	FALSE		0.366	0.403	0.43	0.282	0.341	0.432	0.278		0.399667	0.33325	0.83382	-0.262192
ENSMUSG00000041961	Znrf3	zinc and ring finger 3 [Source:MGI Symbol;Acc:MGI:3039616]	524.968	484.587	501.893	-0.701424	0.18054	-3.88515	0.000102265	0.00187262	TRUE	FALSE		0.3	0.459	0.428	0.292	0.282	0.326	0.285		0.395667	0.29625	0.748736	-0.41747
ENSMUSG00000028199	Cryz	crystallin, zeta [Source:MGI Symbol;Acc:MGI:88527]	71.4319	64.7115	67.5917	-1.08403	0.31652	-3.42483	0.000615191	0.00720337	TRUE	FALSE		0.342	0.451	0.379	0.238	0.151	0.226	0.213		0.390667	0.207	0.529863	-0.916307
ENSMUSG00000008658	Rbfox1	RNA binding protein, fox-1 homolog (C. elegans) 1 [Source:MGI Symbol;Acc:MGI:1926224]	1771.74	1934.72	1864.87	-0.650339	0.165085	-3.93942	8.16782e-05	0.00157452	TRUE	FALSE		0.422	0.348	0.4	0.268	0.349	0.426	0.264		0.39	0.32675	0.837821	-0.255287
ENSMUSG00000024989	Cep55	centrosomal protein 55 [Source:MGI Symbol;Acc:MGI:1921357]	53.105	39.4343	45.2932	-1.21454	0.356947	-3.40257	0.00066756	0.00762499	TRUE	FALSE		0.196	0.611	0.34	0.139	0.201	0.126	0.175		0.382333	0.16025	0.419137	-1.25451
ENSMUSG00000036768	Kif15	kinesin family member 15 [Source:MGI Symbol;Acc:MGI:1098258]	168.87	127.997	145.514	-1.73421	0.249031	-6.96384	3.31114e-12	5.87838e-10	TRUE	FALSE		0.267	0.535	0.324	0.106	0.135	0.164	0.107		0.375333	0.128	0.34103	-1.55203
ENSMUSG00000031333	Abcb7	ATP-binding cassette, sub-family B (MDR/TAP), member 7 [Source:MGI Symbol;Acc:MGI:109533]	329.174	387.653	362.59	-0.641214	0.192477	-3.33138	0.000864166	0.00921036	TRUE	FALSE		0.381	0.329	0.367	0.278	0.311	0.26	0.244		0.359	0.27325	0.761142	-0.393762
ENSMUSG00000025931	Paqr8	progestin and adipoQ receptor family member VIII [Source:MGI Symbol;Acc:MGI:1921479]	115.779	123.68	120.294	-0.952937	0.259879	-3.66685	0.000245553	0.00372933	TRUE	FALSE		0.281	0.393	0.401	0.193	0.262	0.214	0.18		0.358333	0.21225	0.592326	-0.755538
ENSMUSG00000030254	Rad18	RAD18 E3 ubiquitin protein ligase [Source:MGI Symbol;Acc:MGI:1890476]	209.323	191.367	199.063	-0.854638	0.218908	-3.9041	9.45768e-05	0.0017619	TRUE	FALSE		0.374	0.388	0.308	0.252	0.21	0.305	0.218		0.356667	0.24625	0.690421	-0.534453
ENSMUSG00000025742	Prps2	phosphoribosyl pyrophosphate synthetase 2 [Source:MGI Symbol;Acc:MGI:97776]	86.6544	87.6763	87.2383	-0.978792	0.292826	-3.34258	0.000830049	0.00896974	TRUE	FALSE		0.268	0.342	0.449	0.21	0.183	0.272	0.167		0.353	0.208	0.589235	-0.763085
ENSMUSG00000028517	Plpp3	phospholipid phosphatase 3 [Source:MGI Symbol;Acc:MGI:1915166]	161.648	170.523	166.719	-1.12282	0.24014	-4.67569	2.92962e-06	0.00010563	TRUE	FALSE		0.259	0.423	0.321	0.105	0.248	0.175	0.186		0.334333	0.1785	0.533898	-0.905363
ENSMUSG00000027323	Rad51	RAD51 homolog [Source:MGI Symbol;Acc:MGI:97890]	81.5148	66.2974	72.8191	-1.1271	0.323036	-3.48908	0.000484694	0.00608761	TRUE	FALSE		0.234	0.407	0.345	0.221	0.143	0.166	0.124		0.328667	0.1635	0.497465	-1.00733
ENSMUSG00000035683	Melk	maternal embryonic leucine zipper kinase [Source:MGI Symbol;Acc:MGI:106924]	115.149	124.152	120.293	-1.51773	0.257146	-5.9022	3.58686e-09	3.1539e-07	TRUE	FALSE		0.28	0.346	0.33	0.122	0.133	0.128	0.113		0.318667	0.124	0.389121	-1.36171
ENSMUSG00000032281	Acsbg1	acyl-CoA synthetase bubblegum family member 1 [Source:MGI Symbol;Acc:MGI:2385656]	102.344	75.3628	86.9263	-2.22548	0.336882	-6.60611	3.9455e-11	5.44801e-09	TRUE	FALSE		0.171	0.424	0.307	0.076	0.037	0.066	0.059		0.300667	0.0595	0.197894	-2.3372
ENSMUSG00000029554	Mad1l1	MAD1 mitotic arrest deficient 1-like 1 [Source:MGI Symbol;Acc:MGI:1341857]	698.511	778.8	744.39	-0.555339	0.161871	-3.43075	0.000601926	0.00710158	TRUE	FALSE		0.294	0.295	0.308	0.216	0.26	0.271	0.261		0.299	0.252	0.842809	-0.246722
ENSMUSG00000027977	Ndst3	N-deacetylase/N-sulfotransferase (heparan glucosaminyl) 3 [Source:MGI Symbol;Acc:MGI:1932544]	374.79	346.404	358.569	-0.744728	0.218436	-3.40936	0.000651151	0.00750793	TRUE	FALSE		0.26	0.397	0.226	0.156	0.212	0.212	0.256		0.294333	0.209	0.710079	-0.493948
ENSMUSG00000038668	Lpar1	lysophosphatidic acid receptor 1 [Source:MGI Symbol;Acc:MGI:108429]	201.065	183.61	191.091	-1.69704	0.268459	-6.32142	2.59171e-10	2.928e-08	TRUE	FALSE		0.189	0.338	0.329	0.132	0.088	0.088	0.07		0.285333	0.0945	0.331192	-1.59426
ENSMUSG00000035378	Shq1	SHQ1 homolog (S. cerevisiae) [Source:MGI Symbol;Acc:MGI:1919421]	224.141	218.827	221.104	-0.74948	0.210188	-3.56576	0.000362808	0.00503582	TRUE	FALSE		0.307	0.255	0.29	0.23	0.172	0.29	0.178		0.284	0.2175	0.765845	-0.384876
ENSMUSG00000026134	Prim2	DNA primase, p58 subunit [Source:MGI Symbol;Acc:MGI:97758]	453.155	451.895	452.435	-0.714242	0.202703	-3.52358	0.000425755	0.0055782	TRUE	FALSE		0.249	0.334	0.258	0.181	0.172	0.201	0.271		0.280333	0.20625	0.735731	-0.442749
ENSMUSG00000042129	Rassf4	Ras association (RalGDS/AF-6) domain family member 4 [Source:MGI Symbol;Acc:MGI:2386853]	65.5323	62.9394	64.0506	-1.54999	0.323058	-4.79786	1.60368e-06	6.28029e-05	TRUE	FALSE		0.211	0.337	0.268	0.099	0.084	0.084	0.116		0.272	0.09575	0.352022	-1.50626
ENSMUSG00000048058	Ldlrad3	low density lipoprotein receptor class A domain containing 3 [Source:MGI Symbol;Acc:MGI:2138856]	479.933	488.529	484.845	-0.757749	0.194612	-3.89363	9.8754e-05	0.00182591	TRUE	FALSE		0.278	0.302	0.233	0.142	0.211	0.256	0.209		0.271	0.2045	0.754613	-0.406192
ENSMUSG00000059336	Slc14a1	solute carrier family 14 (urea transporter), member 1 [Source:MGI Symbol;Acc:MGI:1351654]	55.0432	62.6517	59.3909	-1.78482	0.360924	-4.94516	7.60824e-07	3.32923e-05	TRUE	FALSE		0.148	0.321	0.321	0.057	0.152	0.032	0.032		0.263333	0.06825	0.259177	-1.94799
ENSMUSG00000031262	Cenpi	centromere protein I [Source:MGI Symbol;Acc:MGI:2147897]	88.3342	74.5227	80.4419	-1.62369	0.300175	-5.40914	6.33283e-08	3.86703e-06	TRUE	FALSE		0.201	0.345	0.219	0.066	0.129	0.112	0.05		0.255	0.08925	0.35	-1.51457
ENSMUSG00000055067	Smyd3	SET and MYND domain containing 3 [Source:MGI Symbol;Acc:MGI:1916976]	1205.67	1158.75	1178.86	-0.503957	0.146682	-3.43571	0.000590995	0.00701703	TRUE	FALSE		0.228	0.25	0.274	0.21	0.214	0.297	0.207		0.250667	0.232	0.925532	-0.111645
ENSMUSG00000021720	Rnf180	ring finger protein 180 [Source:MGI Symbol;Acc:MGI:1919066]	200.686	209.623	205.793	-1.00321	0.21722	-4.61841	3.86683e-06	0.000133484	TRUE	FALSE		0.181	0.278	0.287	0.126	0.157	0.155	0.145		0.248667	0.14575	0.586126	-0.770717
ENSMUSG00000036782	Klhl13	kelch-like 13 [Source:MGI Symbol;Acc:MGI:1914705]	250.304	253.865	252.339	-0.798812	0.219238	-3.64358	0.000268873	0.00398099	TRUE	FALSE		0.189	0.306	0.243	0.179	0.155	0.092	0.2		0.246	0.1565	0.636179	-0.652496
ENSMUSG00000040282	BC052040	cDNA sequence BC052040 [Source:MGI Symbol;Acc:MGI:3026886]	350.708	352.711	351.853	-0.862584	0.187542	-4.59943	4.2365e-06	0.000143848	TRUE	FALSE		0.232	0.253	0.243	0.136	0.161	0.229	0.166		0.242667	0.173	0.712912	-0.488204
ENSMUSG00000039828	Wdr70	WD repeat domain 70 [Source:MGI Symbol;Acc:MGI:1921020]	393.504	435.437	417.466	-0.625313	0.177323	-3.52641	0.000421239	0.0055415	TRUE	FALSE		0.23	0.256	0.24	0.174	0.207	0.172	0.191		0.242	0.186	0.768595	-0.379704
ENSMUSG00000052133	Sema5b	sema domain, seven thrombospondin repeats (type 1 and type 1-like), transmembrane domain (TM) and short cytoplasmic domain, (semaphorin) 5B [Source:MGI Symbol;Acc:MGI:107555]	234.752	192.603	210.667	-0.813252	0.245033	-3.31895	0.000903582	0.00947881	TRUE	FALSE		0.172	0.337	0.213	0.169	0.138	0.133	0.181		0.240667	0.15525	0.645083	-0.632443
ENSMUSG00000034311	Kif4	kinesin family member 4 [Source:MGI Symbol;Acc:MGI:108389]	122.67	128.069	125.755	-2.2077	0.26291	-8.39716	4.57412e-17	1.98294e-14	TRUE	FALSE		0.167	0.286	0.266	0.052	0.057	0.043	0.06		0.239667	0.053	0.22114	-2.17697
ENSMUSG00000032826	Ank2	ankyrin 2, brain [Source:MGI Symbol;Acc:MGI:88025]	977.429	1090.02	1041.77	-0.615524	0.156337	-3.93717	8.24474e-05	0.00158444	TRUE	FALSE		0.246	0.204	0.242	0.182	0.186	0.214	0.172		0.230667	0.1885	0.817197	-0.291245
ENSMUSG00000040373	Cacng5	calcium channel, voltage-dependent, gamma subunit 5 [Source:MGI Symbol;Acc:MGI:2157946]	55.9314	37.5528	45.4293	-2.29304	0.389993	-5.87969	4.11028e-09	3.58036e-07	TRUE	FALSE		0.164	0.335	0.189	0.059	0.033	0.039	0.011		0.229333	0.0355	0.154797	-2.69156
ENSMUSG00000036510	Cdh8	cadherin 8 [Source:MGI Symbol;Acc:MGI:107434]	554.632	649.612	608.906	-0.972158	0.170846	-5.69025	1.26856e-08	9.69148e-07	TRUE	FALSE		0.178	0.253	0.245	0.099	0.176	0.122	0.145		0.225333	0.1355	0.601331	-0.733768
ENSMUSG00000025665	Rps6ka6	ribosomal protein S6 kinase polypeptide 6 [Source:MGI Symbol;Acc:MGI:1914321]	205.664	270.267	242.58	-0.798369	0.233147	-3.42431	0.000616358	0.0072125	TRUE	FALSE		0.236	0.212	0.226	0.125	0.218	0.135	0.127		0.224667	0.15125	0.67322	-0.570851
ENSMUSG00000034544	Rsrc1	arginine/serine-rich coiled-coil 1 [Source:MGI Symbol;Acc:MGI:1914130]	682.731	635.731	655.874	-0.635634	0.178003	-3.57092	0.000355724	0.00495977	TRUE	FALSE		0.215	0.26	0.199	0.172	0.153	0.196	0.195		0.224667	0.179	0.796736	-0.327827
ENSMUSG00000078773	Rad54b	RAD54 homolog B (S. cerevisiae) [Source:MGI Symbol;Acc:MGI:3605986]	81.0751	63.7076	71.1508	-1.64917	0.325021	-5.07403	3.89472e-07	1.85208e-05	TRUE	FALSE		0.141	0.311	0.217	0.082	0.064	0.067	0.071		0.223	0.071	0.318386	-1.65115
[truncated: 49 more rows]
