# Supplementary material for: Extracellular matrix-inducing Sox9 promotes both basal progenitor proliferation and gliogenesis in developing neocortex
Source: eLife. 2020 Mar 19;9:e49808. doi: 10.7554/eLife.49808 (PMC7105383; doi:10.7554/eLife.49808)
Supplement: Supplementary file 2. — Tab-1 (FPKM): FPKM values for each replicate of Sox9 and control samples. Tab-2 (GO_BP): Gene ontology (GO) term enrichment analysis for biological process (BP). Tab-3 (GO_CC): Gene ontology (GO) term enrichment analysis for cellular component. Tab-4 (KEGG): KEGG pathway analysis. [file elife-49808-supp2.xlsx]

## Sheet: FPKM
ensembl_gene_id	ctrl_high_1	ctrl_high_2	ctrl_high_4	sox9_high_1	sox9_high_2	sox9_high_3	sox9_high_4
ENSMUSG00000000001	4.507	4.352	5.044	4.45	5.011	4.921	5.568
ENSMUSG00000000028	0.429	0.749	0.579	0.304	0.229	0.19	0.294
ENSMUSG00000000031	0.33	0.385	1.536	0.057	0.364	0.281	0.173
ENSMUSG00000000037	0.006	0.016	0.01	0.005	0.009	0.032	0.035
ENSMUSG00000000049	0	0	0.001	0.015	0.004	0.003	0.029
ENSMUSG00000000056	11.683	9.268	11.226	9.717	10.193	10.596	9.325
ENSMUSG00000000058	0.239	0.205	0.386	0.208	0.108	0.108	0.114
ENSMUSG00000000078	16.919	15.473	14.362	16.562	9.837	10.98	20.878
ENSMUSG00000000085	0.303	0.339	0.341	0.44	0.393	0.445	0.345
ENSMUSG00000000088	2.983	0.727	0.239	0.322	1.037	1.714	1.736
ENSMUSG00000000093	0.018	0.049	0.061	0.128	0.01	0.091	0.192
ENSMUSG00000000094	0.003	0.01	0.006	0.025	0.016	0.012	0.008
ENSMUSG00000000103	0.005	0	0.004	0.012	0.022	0.013	0.007
ENSMUSG00000000120	0.046	0.016	0.015	0.214	0.06	0.039	0.036
ENSMUSG00000000125	0.008	0.011	0.044	0.065	0.011	0.061	0.041
ENSMUSG00000000126	0	0.009	0.004	0.011	0.004	0.009	0.017
ENSMUSG00000000127	0.257	0.21	0.217	0.195	0.207	0.245	0.219
ENSMUSG00000000131	0.328	0.445	0.494	0.434	0.492	0.354	0.487
ENSMUSG00000000134	0.976	1.017	0.854	0.629	1.301	1.083	0.911
ENSMUSG00000000142	0.102	0.15	0.192	0.35	0.209	0.241	0.312
ENSMUSG00000000148	2.294	1.769	1.596	2.642	2.197	3.708	3.537
ENSMUSG00000000149	0.232	0.227	0.354	0.275	0.209	0.307	0.442
ENSMUSG00000000154	0.04	0.033	0.078	0.141	0.037	0.105	0.071
ENSMUSG00000000157	0.012	0	0.004	0.007	0.022	0.011	0.011
ENSMUSG00000000159	0	0.001	0	0.002	0.002	0.001	0.001
ENSMUSG00000000167	0.045	0.061	0.149	0.156	0.297	0.239	0.265
ENSMUSG00000000168	1.225	1.137	1.49	1.157	1.407	1.531	1.59
ENSMUSG00000000171	22.802	22.985	23.528	25.326	19.852	18.012	22.494
ENSMUSG00000000182	0.01	0	0.011	0.123	0.011	0	0.027
ENSMUSG00000000183	0	0	0.008	0	0.015	0.01	0
ENSMUSG00000000184	10.438	16.411	13.503	9.024	7.997	5.579	6.267
ENSMUSG00000000194	1.081	0.912	1.084	1.095	1.178	1.166	1.387
ENSMUSG00000000197	0.001	0.002	0	0.006	0.003	0.004	0.005
ENSMUSG00000000202	0.237	0.115	0.182	0.349	0.201	0.155	0.287
ENSMUSG00000000204	0.086	0.052	0.153	0.269	0.215	0.382	0.376
ENSMUSG00000000214	0	0.006	0	0	0.002	0	0.006
ENSMUSG00000000215	0.012	0	0	0.007	0.023	0.029	0.022
ENSMUSG00000000216	0.003	0.005	0.02	0.04	0.042	0.032	0.027
ENSMUSG00000000223	0.725	0.332	0.461	0.479	0.477	0.655	0.491
ENSMUSG00000000244	0.041	0.058	0.026	0.329	0.156	0.293	0.279
ENSMUSG00000000247	2.958	4.206	4.168	2.567	3.591	3.335	3.738
ENSMUSG00000000248	0.007	0.018	0.015	0.066	0.03	0.078	0.031
ENSMUSG00000000253	0.173	0.179	0.263	0.289	0.198	0.282	0.273
ENSMUSG00000000263	0.003	0.002	0.012	0.024	0.011	0.031	0.026
ENSMUSG00000000266	0.008	0.008	0.006	0.035	0.017	0.028	0.02
ENSMUSG00000000275	0.045	0.026	0.046	0.294	0.055	0.181	0.151
ENSMUSG00000000276	0.874	1.028	1.05	1.175	1.042	1.258	1.533
ENSMUSG00000000278	0.672	0.968	0.909	0.42	0.408	0.474	0.546
ENSMUSG00000000282	0.892	1.11	0.949	1.307	1.098	1.577	1.037
ENSMUSG00000000290	0.007	0.046	0.011	0.047	0.019	0.045	0.045
ENSMUSG00000000295	2.969	3.267	3.45	2.783	2.477	2.16	3.353
ENSMUSG00000000296	0.021	0.016	0.008	0.022	0.011	0.014	0.04
ENSMUSG00000000301	0.045	0.032	0.034	0.075	0.068	0.048	0.015
ENSMUSG00000000303	0.004	0.024	0.011	0.058	0.058	0.086	0.057
ENSMUSG00000000305	0.612	0.804	0.601	0.85	0.682	0.81	0.571
ENSMUSG00000000308	2.607	1.492	1.793	3.786	2.005	3.632	1.988
ENSMUSG00000000317	1.4	0.547	1.028	1.296	0.654	0.797	0.956
ENSMUSG00000000320	0.025	0.039	0.048	0.162	0.068	0.193	0.13
ENSMUSG00000000325	0.237	0.161	0.331	0.183	0.221	0.234	0.391
ENSMUSG00000000326	1.785	1.618	1.881	1.811	1.31	1.53	1.606
ENSMUSG00000000339	1.358	1.139	1.624	1.193	1.912	1.765	1.608
ENSMUSG00000000340	0.608	0.716	0.642	0.618	0.623	0.705	0.532
ENSMUSG00000000346	105.759	138.665	130.26	103.451	133.896	108.582	108.888
ENSMUSG00000000355	7.38	5.331	6.702	6.982	5.929	6.183	6.54
ENSMUSG00000000359	0.031	0.038	0.046	0.073	0.046	0	0
ENSMUSG00000000365	0.008	0.004	0.011	0.032	0.029	0.035	0.035
ENSMUSG00000000374	0.08	0.039	0.073	0.124	0.074	0.093	0.082
ENSMUSG00000000378	0.58	0.555	0.389	0.454	0.45	0.632	0.503
ENSMUSG00000000381	0	0	0.03	0.143	0.121	0.31	0.501
ENSMUSG00000000384	5.349	4.663	4.775	5.159	5.359	7.448	5.545
ENSMUSG00000000385	0	0	0.002	0.01	0.006	0	0.015
ENSMUSG00000000386	0.011	0	0.006	0.028	0.012	0.015	0.028
ENSMUSG00000000392	0.012	0.012	0.013	0.037	0.027	0.033	0.031
ENSMUSG00000000394	0.426	0.51	0.314	0.461	0.104	0.134	0.594
ENSMUSG00000000399	7.572	7.784	7.433	8.394	8.065	6.678	6.649
ENSMUSG00000000402	0.028	0.036	0.02	0.062	0.045	0.09	0.065
ENSMUSG00000000409	0.358	0.34	0.533	0.344	0.421	0.415	0.589
ENSMUSG00000000411	0.086	0.039	0.143	0.224	0	0.669	0.112
ENSMUSG00000000416	2.175	2.847	2.836	2.09	2.286	2.336	2.625
ENSMUSG00000000420	0.142	0.129	0.123	0.136	0.097	0.141	0.053
ENSMUSG00000000435	0.053	0.12	0.03	0.093	0.236	0.417	0.07
ENSMUSG00000000439	4.659	5.052	4.589	3.83	4.649	4.789	4.862
ENSMUSG00000000440	0.002	0	0.005	0.007	0.007	0.013	0.002
ENSMUSG00000000441	1.009	1.16	1.129	1.05	0.924	0.843	1.041
ENSMUSG00000000486	0.139	0.241	0.153	0.305	0.127	0.222	0.097
ENSMUSG00000000489	0.005	0	0.005	0.016	0.015	0.019	0.036
ENSMUSG00000000530	0.01	0.032	0.034	0.277	0.096	0.189	0.134
ENSMUSG00000000531	0.081	0.073	0.067	0.298	0.045	0.143	0.053
ENSMUSG00000000532	0.327	0.196	0.174	0.352	0.288	0.395	0.291
ENSMUSG00000000538	0.739	0.734	0.75	0.918	0.855	0.827	0.857
ENSMUSG00000000544	0.002	0.002	0	0.004	0.008	0.003	0.006
ENSMUSG00000000552	0.079	0.074	0.12	0.092	0.091	0.051	0.103
ENSMUSG00000000555	0.115	0.103	0.174	0.387	0.284	0.332	0.352
ENSMUSG00000000560	0.248	0.154	0.171	0.071	0.216	0.28	0.206
ENSMUSG00000000561	9.988	9.021	10.124	9.492	9.191	9.657	10.862
ENSMUSG00000000562	0.005	0.006	0.003	0.02	0.012	0.022	0.006
ENSMUSG00000000563	26.572	25.476	30.956	25.243	23.172	21.982	26.571
ENSMUSG00000000567	5.642	14.361	11.532	10.026	7.472	6.115	7.222
ENSMUSG00000000568	1.83	1.849	1.87	1.637	1.885	1.737	1.767
ENSMUSG00000000579	0.138	0.172	0.071	0.13	0.164	0.211	0.167
ENSMUSG00000000581	12.908	10.924	12.09	14.372	9.447	8.241	11.55
ENSMUSG00000000594	6.532	6.78	6.428	6.468	6.638	6.293	6.937
ENSMUSG00000000600	2.083	2.53	2.521	2.237	1.813	1.67	2.734
ENSMUSG00000000605	25.611	22.487	21.772	22.02	25.711	26.411	23.251
ENSMUSG00000000606	0.02	0	0.034	0.053	0.011	0.072	0.079
ENSMUSG00000000617	0.017	0.015	0.018	0.135	0.086	0.11	0.015
ENSMUSG00000000627	0.139	0.131	0.23	0.334	0.205	0.197	0.178
ENSMUSG00000000628	0.215	0.268	0.209	0.331	0.327	0.279	0.187
ENSMUSG00000000631	0.527	0.357	0.381	0.653	0.448	0.673	0.717
ENSMUSG00000000632	2.26	1.603	2.007	1.984	1.628	1.867	1.606
ENSMUSG00000000673	0	0.01	0.006	0.039	0.037	0.063	0
ENSMUSG00000000682	0	0.092	0.03	0.226	0.135	0.048	0.072
ENSMUSG00000000686	0.051	0.043	0.142	0.683	0.352	0.338	0.654
ENSMUSG00000000693	0.019	0.198	0.104	0.392	0.165	0.12	0.246
ENSMUSG00000000701	0.072	0.016	0.02	0.282	0.099	0.051	0
ENSMUSG00000000706	0.029	0	0.054	0.135	0.032	0.165	0.051
ENSMUSG00000000708	0.067	0.05	0.06	0.085	0.082	0.072	0.066
ENSMUSG00000000711	5.989	6.569	6.809	5.655	6.107	6.086	6.418
ENSMUSG00000000724	0.052	0.035	0.057	0.067	0.114	0.275	0.305
ENSMUSG00000000730	0.008	0	0.013	0.138	0.048	0.062	0.24
ENSMUSG00000000731	0.044	0.086	0.035	0.574	0.245	0.288	0.233
ENSMUSG00000000732	0.051	0.069	0.085	0.148	0.14	0.192	0.089
ENSMUSG00000000738	0.349	0.394	0.313	0.672	0.366	0.397	0.519
ENSMUSG00000000739	0.022	0.09	0.037	0.087	0.135	0.166	0.102
ENSMUSG00000000740	151.544	111.437	99.009	66.974	130.882	135.511	187.164
ENSMUSG00000000743	38.384	31.053	35.142	38.885	40.136	38.134	38.35
ENSMUSG00000000751	3.772	4.129	3.714	2.758	2.457	2.909	2.535
ENSMUSG00000000753	0.047	0.012	0.022	0.452	0.221	0.312	0.384
ENSMUSG00000000759	1.021	0.95	1.042	0.849	0.937	1.153	1.072
ENSMUSG00000000766	0.009	0.006	0.009	0.066	0.033	0.048	0.027
ENSMUSG00000000776	4.001	3.298	3.278	3.621	4.591	3.648	4.065
ENSMUSG00000000782	0.034	0.043	0.031	0.01	0.034	0.008	0.044
ENSMUSG00000000787	8.066	10.2	11.046	7.156	9.559	9.295	8.046
ENSMUSG00000000791	0.007	0.006	0.015	0.092	0.088	0.207	0.104
ENSMUSG00000000792	0.219	0.181	0.262	0.471	0.173	0.297	0.366
ENSMUSG00000000794	0.023	0.031	0.027	0.043	0.058	0.058	0.073
ENSMUSG00000000804	0.139	0.132	0.172	0.192	0.161	0.168	0.212
ENSMUSG00000000805	0.031	0.019	0.012	0.345	0.115	0.34	0.109
ENSMUSG00000000811	0.09	0.118	0.121	0.076	0.081	0.074	0.122
ENSMUSG00000000817	0.011	0	0.012	0	0.024	0.016	0.058
ENSMUSG00000000823	19.433	25.129	21.535	27.914	21.695	19.119	24.466
ENSMUSG00000000826	4.502	4.01	3.338	3.187	5.294	6.197	4.85
ENSMUSG00000000827	7.412	10.33	8.459	8.623	7.512	6.855	8.439
ENSMUSG00000000838	0.462	0.596	0.594	0.46	0.548	0.45	0.67
ENSMUSG00000000861	2.63	2.021	2.68	2.146	2.316	2.487	2.163
ENSMUSG00000000869	0.209	0.203	0.158	0.363	0.236	0.304	0.418
ENSMUSG00000000876	0.673	0.54	1.017	0.878	0.567	0.892	0.755
ENSMUSG00000000881	0.446	0.667	0.464	0.61	0.561	0.523	0.406
ENSMUSG00000000884	0.398	0.278	0.256	0.38	0.349	0.319	0.303
ENSMUSG00000000889	0	0	0	0.008	0.011	0.027	0
ENSMUSG00000000901	3.105	3.357	3.43	1.261	2.172	3.029	3.116
ENSMUSG00000000902	26.338	26.772	26.921	26.401	27.295	28.019	26.407
ENSMUSG00000000903	0.026	0	0	0.023	0.014	0.204	0.068
ENSMUSG00000000915	0.37	0.231	0.326	0.291	0.348	0.371	0.495
ENSMUSG00000000916	3.186	3.008	3.724	3.459	3.47	3.157	4.978
ENSMUSG00000000934	0.773	0.495	0.356	0.634	0.647	0.539	0.467
ENSMUSG00000000938	0.036	0.04	0.049	0.217	0.059	0.051	0.117
ENSMUSG00000000942	0.083	0.074	0.092	0	0.091	0.117	0.217
ENSMUSG00000000948	22.899	18.841	18.129	25.447	22.563	22.007	21.371
ENSMUSG00000000957	1.18	1.052	1.535	1.01	0.857	1.253	1.147
ENSMUSG00000000958	0.025	0.043	0.049	0.127	0.065	0.091	0.079
ENSMUSG00000000959	6.262	5.229	5.66	4.671	5.362	5.881	5.141
ENSMUSG00000000976	2.934	2.72	2.865	3.159	2.715	3.436	3.216
ENSMUSG00000000982	0.514	1.795	1.771	3.078	1.007	0.566	0.747
ENSMUSG00000000983	0	0	0	0.193	0	0.157	0.097
ENSMUSG00000001016	66.065	71.163	65.185	60.127	60.7	53.28	59.469
ENSMUSG00000001017	7.137	5.351	5.24	4.426	6.585	7.929	8.742
ENSMUSG00000001018	11.334	11.854	17.132	11.574	9.551	13.696	11.793
ENSMUSG00000001021	0.002	0.002	0.018	0.032	0.061	0.067	0.043
ENSMUSG00000001027	0.005	0.011	0.008	0.052	0.06	0.063	0.052
ENSMUSG00000001029	0.017	0	0.018	0.101	0	0.035	0
ENSMUSG00000001034	14.622	10.694	10.952	11.773	14.943	18.198	16.111
ENSMUSG00000001036	1.195	0.9	1.067	1.163	1.129	1.231	1.114
ENSMUSG00000001039	1.983	2.06	2.59	2.35	1.649	1.46	2.205
ENSMUSG00000001052	0.214	0.205	0.216	0.312	0.204	0.271	0.206
ENSMUSG00000001053	0	0.02	0.037	0.058	0.012	0.236	0.087
ENSMUSG00000001054	4.256	3.645	3.51	3.902	4.193	4.329	4.268
ENSMUSG00000001056	26.129	22.161	25.533	25.826	24.975	23.035	26.964
ENSMUSG00000001062	1.446	1.609	1.299	2.214	1.364	1.58	1.94
ENSMUSG00000001065	0.333	0.309	0.234	0.569	0.532	0.464	0.726
ENSMUSG00000001076	0	0.025	0.061	0.287	0.061	0.078	0.072
ENSMUSG00000001082	6.308	4.124	4.792	5.547	4.875	5.683	8.478
ENSMUSG00000001089	0.345	0.22	0.196	0.24	0.235	0.233	0.231
ENSMUSG00000001098	1.966	1.93	1.845	2.258	2.571	2.388	2.507
ENSMUSG00000001100	4.043	3.028	3.807	2.832	3.292	4.926	4.585
ENSMUSG00000001103	0.211	0.332	0.292	0.367	0.175	0.15	0
ENSMUSG00000001105	14.428	11.978	11.716	14.845	9.8	9.616	14.075
ENSMUSG00000001119	0.005	0.013	0	0.052	0.011	0.084	0.039
ENSMUSG00000001120	0.187	0.131	0.135	0.113	0.178	0.22	0.198
ENSMUSG00000001123	0.047	0.049	0.026	0.246	0.091	0.111	0.103
ENSMUSG00000001127	3.132	3.021	2.801	2.907	2.49	2.323	3.037
ENSMUSG00000001128	0.651	0.597	0.83	0.541	0.795	0.721	0.518
ENSMUSG00000001131	0.038	0.085	0.042	0.099	0.021	0	0.148
ENSMUSG00000001134	0.451	0.481	0.603	0.392	0.487	0.415	0.657
ENSMUSG00000001138	0.885	0.601	0.718	1.026	0.575	0.971	1.338
ENSMUSG00000001143	3.302	2.492	3.149	3.355	3.459	3.185	2.961
ENSMUSG00000001150	1.325	1.124	1.199	1.366	1.249	1.681	1.349
ENSMUSG00000001151	0.164	0.132	0.143	0.224	0.224	0.284	0.237
ENSMUSG00000001155	0.018	0.005	0.007	0.245	0.097	0.158	0.077
ENSMUSG00000001156	0.718	0.624	0.713	0.794	0.748	0.912	1.031
ENSMUSG00000001157	0.371	0.354	0.388	0.339	0.423	0.405	0.413
ENSMUSG00000001158	15.072	14.95	15.727	15.48	13.253	11.085	16.68
ENSMUSG00000001166	0.119	0.019	0.085	0.073	0.069	0	0.037
ENSMUSG00000001168	0	0	0.008	0.012	0.008	0.02	0.056
ENSMUSG00000001173	0.197	0.168	0.206	0.314	0.238	0.24	0.465
ENSMUSG00000001175	212.205	200.138	229.393	191.227	216.006	219.071	216.838
ENSMUSG00000001211	0.195	0.166	0.192	0.288	0.234	0.327	0.222
ENSMUSG00000001225	0.011	0.006	0.01	0.038	0.022	0.062	0.038
ENSMUSG00000001227	0.14	0.171	0.144	0.235	0.215	0.283	0.262
ENSMUSG00000001228	2.084	3.155	2.507	1.599	1.113	1.594	1.243
ENSMUSG00000001229	0.916	1.03	0.911	0.838	0.898	1.036	0.792
ENSMUSG00000001240	0.038	0.029	0.021	0.1	0.035	0.054	0.1
ENSMUSG00000001247	0.044	0.079	0.061	0.067	0.127	0.109	0.072
ENSMUSG00000001248	1.456	1.119	0.983	1.141	1.026	1.043	1.306
ENSMUSG00000001249	0	0	0	0.045	0.017	0.037	0.041
ENSMUSG00000001260	0.011	0.012	0.008	0.01	0.032	0.041	0.022
ENSMUSG00000001270	268.562	250.097	268.813	253.011	253.921	299.808	226.634
ENSMUSG00000001280	0.624	0.883	0.925	0.739	0.914	0.824	0.739
ENSMUSG00000001281	0.032	0.024	0.012	0.151	0.089	0.146	0.085
ENSMUSG00000001285	13.351	16.726	15.339	15.538	11.669	11.043	16.616
ENSMUSG00000001288	0.092	0.048	0.059	0.199	0.122	0.222	0.1
ENSMUSG00000001289	32.942	33.38	34.564	41.849	29.618	24.539	41.432
ENSMUSG00000001300	2.844	3.918	2.967	3.496	3.795	3.604	2.568
ENSMUSG00000001305	1.356	1.16	1.185	0.93	0.975	0.775	1.067
ENSMUSG00000001313	25.529	25.799	27.387	20.946	19.605	11.75	16.774
ENSMUSG00000001323	2.11	1.97	1.747	1.846	1.515	2.065	1.384
ENSMUSG00000001333	0.054	0.037	0.027	0.029	0.041	0.111	0.022
ENSMUSG00000001334	0.704	0.469	0.415	1.383	0.852	1.03	1.011
ENSMUSG00000001348	0.01	0.017	0	0.116	0.074	0.108	0.05
ENSMUSG00000001349	0.008	0.075	0.018	0.043	0.028	0.177	0.022
ENSMUSG00000001366	0.354	0.267	0.361	0.359	0.245	0.337	0.303
ENSMUSG00000001376	0.816	0.662	0.735	0.849	0.799	0.703	0.795
ENSMUSG00000001379	NA	NA	NA	NA	NA	NA	NA
ENSMUSG00000001380	12.874	12.472	13.12	10.067	12.079	13.163	12.029
ENSMUSG00000001383	37.162	34.131	36.267	36.138	37.362	40.026	40.356
ENSMUSG00000001403	3.432	5.392	4.605	1.429	1.183	0.753	1.645
ENSMUSG00000001415	1.204	1.426	1.635	1.398	1.801	1.664	1.854
ENSMUSG00000001416	24.48	24.666	26.143	23.916	23.031	21.878	23.64
ENSMUSG00000001417	NA	NA	NA	NA	NA	NA	NA
ENSMUSG00000001418	14.472	15.066	15.103	15.383	17.281	13.931	14.939
ENSMUSG00000001419	0.497	0.537	0.563	0.459	0.522	0.588	0.448
ENSMUSG00000001420	0.035	0.062	0.013	0.601	0.114	0.375	0.151
ENSMUSG00000001424	0.207	0.174	0.215	0.195	0.18	0.239	0.17
ENSMUSG00000001435	0.011	0.018	0.023	0.075	0.042	0.074	0.022
ENSMUSG00000001436	1.704	1.304	1.549	1.502	1.756	1.768	1.704
ENSMUSG00000001440	1.988	2.388	2.735	2.322	2.157	2.399	2.117
ENSMUSG00000001441	1.301	1.634	1.55	1.426	1.62	1.755	1.519
ENSMUSG00000001444	0.015	0.018	0.028	0.052	0.088	0.071	0.039
ENSMUSG00000001445	6.111	5.235	5.145	5.626	4.759	5.318	5.018
ENSMUSG00000001467	13.198	12.509	12.606	11.829	12.628	14.54	14.002
ENSMUSG00000001472	5.279	4.588	6.415	6.139	6.511	7.389	6.073
ENSMUSG00000001473	0.072	0.419	0.159	0.05	0.277	0.203	0.019
ENSMUSG00000001482	3.977	3.965	3.722	3.55	4.107	4.079	3.062
ENSMUSG00000001493	0.015	0.014	0.017	0.107	0.056	0.08	0.054
ENSMUSG00000001494	0.038	0	0.042	0.132	0.125	0.08	0.05
ENSMUSG00000001496	0.122	0.016	0.097	0.152	0.038	0.074	0.137
ENSMUSG00000001497	0.008	0.015	0.005	0.071	0.086	0.058	0.054
ENSMUSG00000001504	0.064	0.072	0.018	0.167	0.106	0.159	0.126
ENSMUSG00000001506	0.067	0.032	0.028	0.41	0.192	0.327	0.376
ENSMUSG00000001507	0.144	0.139	0.112	0.172	0.238	0.363	0.217
ENSMUSG00000001508	0.006	0.011	0.014	0.078	0.042	0.153	0.133
ENSMUSG00000001510	0.083	0.03	0.018	0.464	0.349	0.307	0.349
ENSMUSG00000001517	0.275	0.429	0.529	0.102	0.159	0.232	0.034
ENSMUSG00000001518	3.298	4.753	5.418	4.504	4.464	4.419	4.361
ENSMUSG00000001520	0.489	0.33	0.363	0.867	0.611	1.17	1.094
ENSMUSG00000001521	0.428	0.476	0.559	0.856	0.636	0.652	0.606
ENSMUSG00000001524	7.366	5.906	6.139	7.14	6.425	6.793	5.563
ENSMUSG00000001525	1784.14	1777.17	1767.66	1446.8	1699.19	1642.17	1448.55
ENSMUSG00000001542	0.012	0.002	0.007	0.039	0.037	0.021	0.01
ENSMUSG00000001552	1.291	0.533	0.634	1.375	1.175	1.752	1.521
ENSMUSG00000001555	0.095	0.093	0.147	0.049	0.146	0.067	0.049
ENSMUSG00000001558	0.08	0.077	0.076	0.04	0.031	0.049	0.03
ENSMUSG00000001566	0.016	0.029	0.035	0.138	0.035	0.067	0.125
ENSMUSG00000001569	0.771	0.816	0.779	0.906	1.054	0.886	0.984
ENSMUSG00000001576	0.602	0.529	0.364	0.351	0.571	0.754	0.327
ENSMUSG00000001583	0.056	0.09	0.037	0.699	0.48	0.38	0.058
ENSMUSG00000001588	0.006	0.028	0.027	0.268	0.082	0.14	0.129
ENSMUSG00000001604	0.006	0.003	0.007	0.011	0.014	0.036	0.025
ENSMUSG00000001622	0.012	0	0	0	0.013	0.103	0.096
ENSMUSG00000001627	0.105	0.144	0.161	0.179	0.174	0.154	0.159
ENSMUSG00000001630	1.271	2.02	1.396	1.288	1.513	1.199	1.293
ENSMUSG00000001632	1.407	1.342	0.949	1.659	1.701	1.503	1.67
ENSMUSG00000001642	2.466	2.637	2.325	1.925	1.738	2.153	1.607
ENSMUSG00000001655	0.045	0.01	0.012	0.078	0.025	0.079	0.088
ENSMUSG00000001656	0	0.024	0	0	0.058	0.149	0
ENSMUSG00000001657	0.074	0.088	0.245	0.771	0.434	0.732	0.387
ENSMUSG00000001661	0.006	0.006	0.007	0.055	0.007	0.027	0.05
ENSMUSG00000001663	0.099	0.189	0.207	0.284	0.225	0.347	0.107
ENSMUSG00000001665	0.012	0	0.065	0.349	0.091	0.452	0.619
ENSMUSG00000001666	4.148	3.3	3.238	3.847	3.875	3.19	4.034
ENSMUSG00000001670	0	0	0	0.016	0	0	0.048
ENSMUSG00000001672	0.048	0.092	0.02	0.42	0.113	0.368	0.648
ENSMUSG00000001674	3.737	4.04	3.484	3.678	3.709	3.048	3.527
ENSMUSG00000001687	0.514	0.373	0.395	0.894	0.581	0.396	0.549
ENSMUSG00000001700	0.006	0.014	0.033	0.019	0.041	0.046	0.025
ENSMUSG00000001707	10.188	9.324	8.855	10.084	8.49	7.444	10.099
ENSMUSG00000001729	2.359	1.983	2.927	2.122	2.564	2.849	2.853
ENSMUSG00000001739	0.103	0.092	0.114	0.536	0.34	0.542	0.367
ENSMUSG00000001741	0.01	0.002	0.002	0.045	0.01	0.014	0.024
ENSMUSG00000001750	0.311	0.503	0.733	1.272	0.978	0.805	0.611
ENSMUSG00000001751	0.135	0.081	0.125	0.255	0.099	0.048	0.295
ENSMUSG00000001755	9.833	9.404	11.717	9.732	8.867	10.31	8.525
ENSMUSG00000001761	0.103	0.132	0.137	0.099	0.099	0.076	0.052
ENSMUSG00000001763	0.035	0.019	0.016	0.191	0.078	0.105	0.093
ENSMUSG00000001767	6.731	7.552	7.009	7.52	7.332	5.854	6.441
ENSMUSG00000001768	0.02	0.028	0.049	0.114	0.126	0.053	0.046
ENSMUSG00000001773	0	0.003	0.002	0.013	0.007	0.015	0.012
ENSMUSG00000001774	5.923	6.357	6.913	5.136	5.141	5.291	6.298
ENSMUSG00000001783	23.641	23.949	23.174	22.245	24.53	22.154	20.238
ENSMUSG00000001785	7.671	7.688	6.715	6.517	6.731	6.894	7.196
ENSMUSG00000001786	0.889	0.746	0.885	0.763	0.862	0.858	0.582
ENSMUSG00000001794	4.272	5.259	3.936	3.904	4.02	3.499	4.965
ENSMUSG00000001802	0.898	0.466	0.76	0.756	0.559	0.727	0.861
ENSMUSG00000001804	0.048	0.007	0.059	0.122	0.085	0.127	0.089
ENSMUSG00000001819	0.131	0.047	0.058	0.091	0.058	0	0.343
ENSMUSG00000001823	0.064	0.058	0	0.613	0.035	0.091	0.252
ENSMUSG00000001827	0.007	0.019	0.031	0.169	0.099	0.265	0.363
ENSMUSG00000001829	0.207	0.198	0.191	0.341	0.207	0.287	0.268
ENSMUSG00000001833	8.551	8.381	8.241	8.678	7.607	6.547	8.378
ENSMUSG00000001844	4.271	4.157	4.417	3.161	3.456	4.154	4.547
ENSMUSG00000001847	1.503	1.705	1.809	1.611	1.485	1.658	1.805
ENSMUSG00000001855	1.037	0.936	0.813	0.845	0.881	0.926	0.744
ENSMUSG00000001864	1.118	1.875	2.055	0.766	0.971	0.991	0.824
ENSMUSG00000001865	0.003	0.012	0.011	0.011	0.007	0.037	0.009
ENSMUSG00000001870	0.015	0.014	0.022	0.041	0.039	0.026	0.064
ENSMUSG00000001891	0.383	0.387	0.338	0.414	0.515	0.337	0.614
ENSMUSG00000001909	2.051	2.399	2.23	2.656	2.24	2.752	2.995
ENSMUSG00000001910	0.626	0.606	0.649	0.716	0.679	0.865	0.793
ENSMUSG00000001911	7.226	4.717	7.164	6.065	8.368	8.096	5.654
ENSMUSG00000001918	0.189	0.22	0.147	0.151	0.197	0.253	0.48
ENSMUSG00000001924	25.347	21.784	27.234	24.718	27.473	30.035	24.403
ENSMUSG00000001930	0.022	0.01	0.027	0.168	0.082	0.135	0.145
ENSMUSG00000001942	0.275	0.27	0.205	0.274	0.276	0.365	0.19
ENSMUSG00000001943	0.017	0.016	0	0.091	0.019	0	0
ENSMUSG00000001946	0.143	0.219	0.112	0.22	0.464	0.764	0.331
ENSMUSG00000001948	0.315	0.282	0.513	0.403	0.429	0.422	0.347
ENSMUSG00000001962	10.44	8.025	6.608	3.753	7.992	9.652	10.697
ENSMUSG00000001964	1.962	1.875	1.073	2.493	2.135	2.244	0.988
ENSMUSG00000001983	0.857	0.698	0.696	0.675	0.466	0.761	0.808
ENSMUSG00000001985	0.024	0.007	0.011	0.032	0.013	0.011	0.012
ENSMUSG00000001986	0.148	0.132	0.142	0.329	0.29	0.228	0.267
ENSMUSG00000001988	0.041	0.011	0.032	0.271	0.126	0.261	0.086
ENSMUSG00000001995	0.421	0.312	0.367	0.366	0.296	0.339	0.43
ENSMUSG00000001998	0.328	0.471	0.373	0.542	0.471	0.489	0.473
ENSMUSG00000001999	1.274	1.373	1.15	1.255	1.159	0.944	1.411
ENSMUSG00000002006	0.352	0.321	0.354	0.403	0.37	0.487	0.314
ENSMUSG00000002007	0.038	0.051	0	0	0.063	0.027	0
ENSMUSG00000002010	14.333	15.831	14.082	14.408	13.724	13.832	13.608
ENSMUSG00000002012	21.952	19	17.223	24.742	21.935	23.179	24.982
ENSMUSG00000002014	17.179	17.446	17.722	17.282	14.082	13.532	18.061
ENSMUSG00000002015	2.065	2.281	2.262	2.426	2.086	1.886	2.093
ENSMUSG00000002017	3.478	2.712	3.486	4.321	4.32	4.457	4.286
ENSMUSG00000002020	0.003	0.002	0	0.024	0.02	0.02	0.031
ENSMUSG00000002028	0.956	0.974	1.015	1.074	1.026	1.06	0.869
ENSMUSG00000002031	7.965	7.656	7.625	7.91	8.074	7.484	7.412
ENSMUSG00000002032	0.796	1.205	1.296	0.787	1.307	2.276	1.225
ENSMUSG00000002033	0.008	0	0.018	0.083	0.026	0.079	0.042
ENSMUSG00000002043	1.113	0.76	0.851	1.858	1.043	1.088	0.816
ENSMUSG00000002052	2.361	2.569	2.029	2.363	2.995	2.694	2.325
ENSMUSG00000002055	0.948	1.766	1.219	0.495	0.463	0.718	0.259
ENSMUSG00000002057	0.006	0.013	0.013	0.16	0.095	0.105	0.055
ENSMUSG00000002058	1.184	1.336	1.581	1.769	1.406	1.549	1.272
ENSMUSG00000002059	3.737	4.674	4.445	4.904	2.477	3.962	5.102
ENSMUSG00000002064	7.212	6.437	5.989	6.724	6.857	5.264	6.95
ENSMUSG00000002068	0.226	0.276	0.28	0.141	0.139	0.358	0.284
ENSMUSG00000002076	0.016	0.003	0.002	0.043	0.035	0.026	0.033
ENSMUSG00000002083	0.191	0.072	0.078	0.245	0.122	0.142	0.237
ENSMUSG00000002100	0.014	0.021	0.026	0.131	0.166	0.233	0.123
ENSMUSG00000002102	26.031	30.794	28.007	26.338	27.121	22.791	23.428
ENSMUSG00000002103	9.965	10.656	10.697	9.566	10.126	10.768	10.455
ENSMUSG00000002105	0.89	0.629	0.587	0.487	0.882	0.666	0.733
ENSMUSG00000002107	1.209	1.214	1.107	1.108	1.202	1.192	1.006
ENSMUSG00000002108	0.055	0.066	0.061	0.104	0.086	0.124	0.036
ENSMUSG00000002109	0.122	0.262	0.199	0.124	0.075	0.144	0.142
ENSMUSG00000002111	0.008	0.007	0	0.054	0.037	0.033	0.047
ENSMUSG00000002129	9.604	10.144	9.596	8.998	10.323	10.871	8.021
ENSMUSG00000002147	0.019	0.142	0.106	0.142	0.032	0.088	0.013
ENSMUSG00000002190	0.294	0.212	0.247	0.26	0.236	0.224	0.175
ENSMUSG00000002204	0.113	0.064	0.079	0.445	0.256	0.473	0.187
ENSMUSG00000002205	1.524	1.432	1.744	1.32	1.444	1.566	1.351
ENSMUSG00000002210	0.682	0.555	0.64	1.004	0.813	1.288	1.297
ENSMUSG00000002221	0.249	0.374	0.359	0.291	0.21	0.263	0.403
ENSMUSG00000002222	0.287	0.206	0.213	0.219	0.263	0.247	0.308
ENSMUSG00000002227	0.073	0.121	0.089	0.24	0.216	0.16	0.238
ENSMUSG00000002228	0.035	0.016	0.039	0.06	0.019	0.025	0.046
ENSMUSG00000002233	0.397	1.121	1.43	0.493	0.594	0.522	0.705
ENSMUSG00000002240	0.017	0.007	0.009	0.087	0.037	0.1	0
ENSMUSG00000002249	0.095	0.045	0.06	0.125	0.065	0.07	0.118
ENSMUSG00000002250	0.023	0.01	0.007	0.105	0.048	0.057	0.056
ENSMUSG00000002257	0.021	0.019	0.018	0.079	0.137	0.141	0
ENSMUSG00000002265	1.707	2.435	2.02	2.645	2.347	2.16	1.753
ENSMUSG00000002266	0.01	0	0.015	0.018	0.03	0.029	0.072
ENSMUSG00000002274	0	0.06	0	0	0.037	0.143	0.088
ENSMUSG00000002279	0.23	0.207	0.287	0.303	0.348	0.342	0.311
ENSMUSG00000002280	5.119	3.568	4.171	5.526	4.627	4.259	5.838
ENSMUSG00000002289	0.254	0.188	0.085	0.211	0.073	0.266	0.318
ENSMUSG00000002297	0.191	0.436	0.301	0.519	0.303	0.423	0.263
ENSMUSG00000002307	16.809	17.191	11.438	14.577	20.498	20.266	16.973
ENSMUSG00000002308	4.015	4.174	4.805	3.951	3.87	5.011	4.799
ENSMUSG00000002319	9.93	8.589	9.523	7.492	9.163	11.404	8.587
ENSMUSG00000002320	3.235	2.52	2.852	3.884	3.081	4.956	3.601
ENSMUSG00000002324	1.231	1.348	2	0.938	1.964	1.96	1.658
ENSMUSG00000002325	1.242	1.392	1.287	1.905	1.943	1.873	1.853
ENSMUSG00000002326	7.138	5.84	6.073	7.438	5.328	5.815	7.974
ENSMUSG00000002329	30.128	27.411	30.283	30.015	25.031	26.264	35.484
ENSMUSG00000002332	13.13	14.591	17.037	13.45	14.3	14.346	13.783
ENSMUSG00000002341	169.867	179.723	130.539	175.449	220.268	185.579	142.803
ENSMUSG00000002342	4.244	3.661	3.781	4.04	4.19	3.906	4.488
ENSMUSG00000002343	9.392	5.871	7.89	10.789	7.332	9.165	7.395
ENSMUSG00000002345	1.621	1.476	1.441	2.214	1.75	1.795	1.759
ENSMUSG00000002346	0.201	0.08	0.13	0.311	0.173	0.315	0.105
ENSMUSG00000002365	0.003	0.004	0.004	0.01	0.002	0.001	0.01
ENSMUSG00000002372	2.697	2.272	2.71	2.436	2.517	3.386	2.567
ENSMUSG00000002379	19.874	22.054	23.194	29.559	22.403	17.956	26.223
ENSMUSG00000002384	0	0.014	0.004	0.022	0.007	0.009	0.05
ENSMUSG00000002393	0.022	0.069	0.049	0.077	0.012	0.125	0.144
ENSMUSG00000002395	31.832	33.101	30.753	30.534	25.324	24.45	35.009
ENSMUSG00000002396	0.278	0.125	0.202	0.298	0.142	0.152	0.336
ENSMUSG00000002409	0.254	0.099	0.147	0.192	0.109	0.234	0.491
ENSMUSG00000002413	2.654	2.642	2.485	2.722	2.754	2.208	2.284
ENSMUSG00000002416	1.589	1.778	1.857	4.039	2.42	3.087	3.908
ENSMUSG00000002428	1.162	1.179	1.043	0.89	1.105	0.997	1.001
ENSMUSG00000002455	3.051	2.761	2.998	2.46	2.809	3.293	2.741
ENSMUSG00000002458	5.651	5.005	5.657	5.398	3.798	4.595	4.633
ENSMUSG00000002459	0.019	0.033	0.033	0.021	0.019	0.017	0.011
ENSMUSG00000002475	0.004	0.001	0	0.012	0.005	0.006	0.011
ENSMUSG00000002477	14.455	13.694	14.995	16.247	13.425	12.111	17.34
ENSMUSG00000002486	0.255	0.277	0.217	0.474	0.424	0.705	0.372
ENSMUSG00000002489	0.044	0.036	0.033	0.062	0.056	0.079	0.073
ENSMUSG00000002496	2.504	2.27	2.566	2.208	3.079	3.134	2.278
ENSMUSG00000002500	0.01	0.037	0.011	0.126	0.08	0.044	0.027
ENSMUSG00000002504	0.055	0.028	0.087	0.122	0.129	0.078	0.02
ENSMUSG00000002524	37.056	30.773	33.862	32.242	34.683	35.906	37.485
ENSMUSG00000002546	1.101	0.913	1.094	0.877	1.185	1.297	1.034
ENSMUSG00000002550	3.028	1.082	0.797	0.785	1.18	2.322	2.935
ENSMUSG00000002565	0.012	0.006	0.005	0.046	0.033	0.026	0.021
ENSMUSG00000002578	1.168	1.033	1.42	1.466	1.438	1.912	1.178
ENSMUSG00000002580	47.142	42.276	48.271	52.032	48.401	43.34	51.936
ENSMUSG00000002588	0.007	0.018	0.011	0.087	0.055	0.043	0.035
ENSMUSG00000002602	0.143	0.192	0.24	0.329	0.145	0.171	0.137
ENSMUSG00000002603	0.014	0.013	0.011	0.224	0.105	0.122	0.05
ENSMUSG00000002608	7.232	4.708	5.879	7.518	7.434	8.819	7.329
ENSMUSG00000002617	2.782	2.127	1.869	2.028	2.272	1.866	2.272
ENSMUSG00000002625	0.997	0.994	1.19	1.333	1.354	1.66	1.232
ENSMUSG00000002633	0	0	0	0.057	0.036	0.012	0.043
ENSMUSG00000002635	2.703	2.848	3.049	3.367	3.104	2.371	3.232
ENSMUSG00000002658	19.504	18.509	19.52	20.21	18.409	20.309	21.691
ENSMUSG00000002660	28.666	34.562	30.956	28.397	27.391	28.456	26.149
ENSMUSG00000002661	8.615	7.971	8.097	9.835	8.44	6.779	11.96
ENSMUSG00000002664	0.923	0.414	0.17	1.337	0.678	0.654	2.013
ENSMUSG00000002668	0.353	0.541	0.353	0.458	0.229	0.55	0.381
ENSMUSG00000002679	1.665	1.745	2.05	1.378	1.778	1.327	2.232
ENSMUSG00000002688	0.015	0.026	0.018	0.015	0.011	0.01	0.018
ENSMUSG00000002699	0.004	0.036	0.015	0.066	0.054	0.024	0.065
ENSMUSG00000002718	4.585	5.154	4.988	4.012	4.014	4.471	4.406
ENSMUSG00000002728	3.132	3.9	3.716	4.021	2.795	2.09	4.005
ENSMUSG00000002731	4.701	4.363	4.911	4.364	3.921	4.128	4.102
ENSMUSG00000002732	0.72	0.992	0.864	0.998	0.623	0.546	1.346
ENSMUSG00000002733	0.388	0.392	0.288	0.313	0.3	0.357	0.398
ENSMUSG00000002741	9.722	11.097	10.224	6.144	6.593	7.421	8.241
ENSMUSG00000002748	0.91	1.082	1.424	1.053	0.905	1.14	0.871
ENSMUSG00000002763	0.325	0.22	0.475	0.554	0.5	0.469	0.546
ENSMUSG00000002767	14.343	14.823	19.921	15.884	13.693	14.596	18.544
ENSMUSG00000002768	76.461	79.573	81.636	84.003	67.07	64.83	87.573
ENSMUSG00000002769	0.394	0.487	0.136	0.3	0.271	0.593	0.064
ENSMUSG00000002771	0.038	0.018	0.008	0.079	0.022	0.086	0.046
ENSMUSG00000002778	0.872	0.555	0.492	1.295	1.162	1.549	0.788
ENSMUSG00000002781	0.221	0.122	0.141	0.184	0.271	0.361	0.233
ENSMUSG00000002791	0.003	0.022	0.009	0.062	0.052	0.113	0.043
ENSMUSG00000002797	1.939	1.397	1.3	1.562	1.421	2.192	1.35
ENSMUSG00000002799	0.107	0.037	0.032	0.151	0.159	0.105	0.173
ENSMUSG00000002803	0.67	0.633	1.132	1.103	0.583	0.949	1.015
ENSMUSG00000002804	2.664	1.931	2.498	2.62	2.563	1.853	3.456
ENSMUSG00000002808	0.187	0.212	0.146	0.133	0.118	0.309	0.129
ENSMUSG00000002812	3.047	2.583	3.433	2.614	2.461	2.511	2.458
ENSMUSG00000002814	0.772	0.895	0.838	0.816	0.714	0.907	0.793
ENSMUSG00000002820	1.265	1.188	1.222	1.042	2.108	1.374	2.416
ENSMUSG00000002825	8.076	8.713	7.417	8.816	7.583	8.123	9.073
ENSMUSG00000002831	0.009	0.042	0.01	0.065	0.041	0.027	0.025
ENSMUSG00000002833	3.601	2.435	2.99	3.64	3.574	4.587	3.916
ENSMUSG00000002835	0.097	0.09	0.104	0.12	0.11	0.04	0.049
ENSMUSG00000002844	24.784	18.686	23.127	22.328	20.95	25.464	27.08
ENSMUSG00000002845	0.446	0.588	0.431	0.489	0.503	0.387	0.405
ENSMUSG00000002846	3.772	3.983	4.005	3.14	3.633	2.985	4.162
ENSMUSG00000002870	3.777	4.171	4.065	1.735	1.901	1.804	1.52
ENSMUSG00000002871	2.419	2.754	2.603	2.524	1.409	2.264	3.415
ENSMUSG00000002881	0.215	0.175	0.178	0.218	0.178	0.138	0.187
ENSMUSG00000002885	0.019	0.026	0.053	0.207	0.142	0.25	0.15
ENSMUSG00000002897	0.128	0.089	0.063	0.105	0.117	0.101	0.167
ENSMUSG00000002900	0.869	0.873	0.976	0.731	0.997	1.059	0.796
ENSMUSG00000002908	0.225	0.181	0.288	0.692	0.528	0.784	0.408
ENSMUSG00000002910	0.473	0.238	0.879	1.052	0.646	0.643	0.841
ENSMUSG00000002930	0.023	0.056	0.031	0.109	0.025	0.008	0.089
ENSMUSG00000002944	0.007	0.004	0.001	0.055	0.024	0.035	0.042
ENSMUSG00000002948	1.998	1.895	2.328	1.474	1.952	2.429	1.727
ENSMUSG00000002949	3.77	4.511	4.465	4.051	3.597	4.025	4.202
ENSMUSG00000002957	1.533	1.361	1.502	1.654	1.497	1.629	1.642
ENSMUSG00000002963	5.233	4.276	5.34	3.768	3.607	3.278	5.017
ENSMUSG00000002968	0.417	0.272	0.336	0.621	0.495	0.812	0.666
ENSMUSG00000002980	0.029	0	0.013	0.363	0.121	0.304	0.091
ENSMUSG00000002981	0.567	0.428	0.42	0.565	0.716	1.037	1.202
ENSMUSG00000002983	0.03	0.033	0.066	0.22	0.106	0.142	0.097
ENSMUSG00000002984	0.244	0.214	0.203	0.913	0.586	1.125	0.959
ENSMUSG00000002985	2.97	2.114	0.683	1.023	2.811	3.691	3.154
ENSMUSG00000002992	0	0.049	0	0.024	0	0.058	0
ENSMUSG00000002996	7.434	10.282	9.589	8.415	9.525	6.87	8.344
ENSMUSG00000002997	0.338	0.224	0.412	0.322	0.253	0.283	0.202
ENSMUSG00000003031	64.188	78.487	82.524	49.213	64.961	54.243	76.706
ENSMUSG00000003032	0.405	0.888	0.539	0.958	0.375	0.413	1.443
ENSMUSG00000003033	24.915	20.814	20.984	21.44	22.155	20.386	20.185
ENSMUSG00000003037	11.348	12.563	11.783	11.689	11.317	11.842	10.327
ENSMUSG00000003038	126.312	162.42	159.217	87.241	90.551	87.033	99.774
ENSMUSG00000003039	55.396	54.264	53.402	54.48	51.226	57.409	53.585
ENSMUSG00000003051	0.017	0.078	0.115	0.03	0.095	0.294	0.452
ENSMUSG00000003053	0.001	0	0	0.01	0.006	0.008	0
ENSMUSG00000003062	2.497	2.216	1.906	2.763	2.011	1.77	2.459
ENSMUSG00000003068	0.655	0.901	0.893	0.706	0.946	0.715	0.972
ENSMUSG00000003070	0.336	0.375	0.372	0.399	0.271	0.383	0.322
ENSMUSG00000003072	17.95	14.169	19.352	18.872	20.353	24.796	21.186
ENSMUSG00000003099	2.52	1.687	2.336	2.912	2.659	3.118	3.444
ENSMUSG00000003119	0.822	0.757	0.831	0.843	0.706	0.709	0.817
ENSMUSG00000003123	0.801	0.751	0.767	1.376	0.932	1.255	0.624
ENSMUSG00000003131	22.289	15.632	11.859	9.111	18.212	18.844	20.509
ENSMUSG00000003134	0.026	0.045	0.051	0.064	0.037	0.041	0.101
ENSMUSG00000003135	0.225	0.085	0.217	0.378	0.216	0.431	0.399
ENSMUSG00000003153	0.739	0.546	0.774	0.829	0.719	0.742	0.768
ENSMUSG00000003154	0.268	0.189	0.218	0.218	0.232	0.278	0.302
ENSMUSG00000003161	1.94	1.54	1.801	2.472	1.506	1.804	2.171
ENSMUSG00000003166	0.878	0.928	0.846	0.672	0.993	1.071	1.054
ENSMUSG00000003178	NA	NA	NA	NA	NA	NA	NA
ENSMUSG00000003184	3.435	3.174	3.033	3.145	2.853	2.35	3.475
ENSMUSG00000003190	0.334	0.683	1.021	0.22	0.19	0.31	0.06
ENSMUSG00000003198	1.774	2.606	1.909	2.093	2.095	1.651	2.289
ENSMUSG00000003199	1.69	1.776	1.518	1.435	1.27	1.434	2.1
ENSMUSG00000003200	3.194	2.825	3.317	2.444	3.286	3.559	3.522
ENSMUSG00000003206	0.373	0.264	0.304	0.955	0.541	1.028	0.565
ENSMUSG00000003208	1.438	1.353	1.854	1.781	1.682	1.506	1.985
ENSMUSG00000003226	0.514	0.552	0.594	0.78	0.499	0.809	0.587
ENSMUSG00000003227	0.009	0.004	0.022	0.038	0.03	0.044	0.027
ENSMUSG00000003228	0.009	0.012	0.007	0.016	0.008	0.008	0.004
ENSMUSG00000003233	2.282	2.992	2.805	2.047	2.387	2.643	2.573
ENSMUSG00000003234	12.435	14.03	12.333	12.632	9.946	10.949	10.075
ENSMUSG00000003235	2.456	2.358	2.797	2.465	2.527	2.787	2.271
ENSMUSG00000003269	2.798	2.371	3.36	3.048	2.155	2.61	2.971
ENSMUSG00000003271	0.079	0.034	0.023	0.086	0.029	0.054	0.031
ENSMUSG00000003273	2.197	1.342	1.915	2.88	2.342	3.29	3.629
ENSMUSG00000003279	0.007	0.004	0.008	0.028	0.018	0.025	0.019
ENSMUSG00000003282	0.076	0.176	0.107	0.08	0.119	0.059	0.217
ENSMUSG00000003283	0.022	0.034	0.007	0.077	0.06	0.091	0.095
ENSMUSG00000003299	15.918	17.345	14.983	15.892	16.421	18.097	14.853
ENSMUSG00000003308	4.169	3.607	3.573	3.312	3.872	5.078	3.928
ENSMUSG00000003309	0.015	0.005	0.011	0.071	0.051	0.101	0.013
ENSMUSG00000003316	0.86	0.722	0.727	0.701	0.809	0.872	0.72
ENSMUSG00000003341	0.075	0.024	0	0.614	0.321	0.6	0.37
ENSMUSG00000003344	1.104	0.488	1.137	1.339	0.678	0.803	1.141
ENSMUSG00000003345	0.23	0.28	0.388	0.258	0.285	0.442	0.452
ENSMUSG00000003346	0.594	0.44	0.7	0.808	0.213	0.585	0.743
ENSMUSG00000003348	0.995	1.01	1.102	0.888	1.183	1.38	1.568
ENSMUSG00000003352	5.054	4.501	5.38	5.606	5.632	6.483	6.752
ENSMUSG00000003354	0.063	0.015	0.095	0.198	0.101	0.178	0.134
ENSMUSG00000003355	0.113	0.223	0.125	0.235	0.174	0.192	0.059
ENSMUSG00000003360	0.627	0.991	0.834	1.014	0.873	0.998	1.259
ENSMUSG00000003363	10.333	9.473	8.626	12.026	11.832	9.348	11.007
ENSMUSG00000003378	0.083	0.097	0.136	0.134	0.123	0.111	0.13
ENSMUSG00000003379	0.107	0.064	0.06	0.28	0.217	0.051	0.141
ENSMUSG00000003380	10.318	9.499	11.811	14.342	14.35	14.737	13.92
ENSMUSG00000003382	1.094	1.114	1.29	1.139	1.393	1.334	1.363
ENSMUSG00000003402	3.726	3.145	3.256	3.581	4.626	5.136	4.342
ENSMUSG00000003410	8.375	7.663	5.037	5.653	6.294	6.398	4.918
ENSMUSG00000003411	0.289	0.218	0.245	0.28	0.266	0.344	0.39
ENSMUSG00000003418	0.011	0.017	0.014	0.039	0.041	0.085	0.051
ENSMUSG00000003420	0.024	0.05	0.018	0.332	0.114	0.068	0
ENSMUSG00000003421	6.855	6.648	7.373	5.982	6.644	6.736	5.663
ENSMUSG00000003423	12.472	11.912	13.747	10.908	11.01	11.302	10.883
ENSMUSG00000003429	294.805	284.156	309.936	311.878	256.253	220.905	284.914
ENSMUSG00000003435	13.73	14.039	15.068	12.64	15.503	16.122	14.307
ENSMUSG00000003436	0.05	0.054	0.099	0.242	0.131	0.127	0.13
ENSMUSG00000003437	12.828	11.472	12.145	12.422	11.804	12.606	13.72
ENSMUSG00000003438	8.449	6.051	4.111	3.364	6.063	8.631	8.234
ENSMUSG00000003444	2.643	2.586	2.622	3.063	2.811	2.44	3.442
ENSMUSG00000003452	0.287	0.268	0.179	0.398	0.449	0.343	0.382
ENSMUSG00000003458	16.354	17.356	15.508	15.17	16.036	14.011	14.644
ENSMUSG00000003464	47.961	51.164	49.986	42.072	47.509	46.145	42.842
ENSMUSG00000003469	0.091	0.109	0.084	0.489	0.444	0.678	0.239
ENSMUSG00000003476	0.002	0.005	0.004	0.007	0.009	0.017	0.047
ENSMUSG00000003477	0	0.053	0.022	0	0.022	0.028	0
ENSMUSG00000003484	0.041	0.026	0	0.184	0.099	0.11	0.021
ENSMUSG00000003500	0.953	0.452	0.864	1.309	1.206	1.212	1.134
ENSMUSG00000003518	1.294	1.206	1.295	1.673	1.27	1.725	1.011
ENSMUSG00000003526	0.139	0.08	0.045	0.05	0.102	0.02	0.038
ENSMUSG00000003527	7.99	7.095	7.062	7.602	7.778	6.583	8.515
ENSMUSG00000003528	3.901	3.04	5.211	5.237	2.308	3.738	4.43
ENSMUSG00000003531	3.562	2.786	3.513	3.828	3.587	3.633	3.935
ENSMUSG00000003534	1.022	0.894	0.924	0.976	1.105	0.986	0.921
ENSMUSG00000003541	11.072	10.256	9.565	6.659	11.743	11.442	8.568
ENSMUSG00000003545	0.059	0.211	0.208	0.245	0.401	0.133	0.307
ENSMUSG00000003546	3.674	2.979	3.727	3.194	4.357	4.589	5.432
ENSMUSG00000003549	6.978	7.626	6.916	6.909	8.039	6.534	6.846
ENSMUSG00000003555	0.015	0	0.016	0	0	0.042	0
ENSMUSG00000003559	0.21	0.147	0.261	0.205	0.133	0.407	0.168
ENSMUSG00000003573	0.404	0.437	0.431	0.468	0.371	0.403	0.588
ENSMUSG00000003575	0.692	0.38	0.615	0.663	0.708	0.899	0.671
ENSMUSG00000003581	0.838	0.87	1.169	1.658	0.844	0.983	1.4
ENSMUSG00000003585	0.026	0.012	0.025	0.028	0.029	0.074	0.06
ENSMUSG00000003604	0.016	0.016	0.026	0.086	0.066	0.079	0.078
ENSMUSG00000003617	0.03	0.016	0.033	0.161	0.068	0.169	0.069
ENSMUSG00000003623	1.106	1.486	1.249	1.146	1.41	0.933	1.588
ENSMUSG00000003644	0.058	0.052	0.134	0.107	0.101	0.078	0.05
ENSMUSG00000003657	0.067	0.048	0.115	0.035	0.044	0.267	0.07
ENSMUSG00000003660	6.741	6.916	6.325	4.987	6.37	5.652	4.156
ENSMUSG00000003662	8.769	9.914	8.268	8.354	8.517	9.204	9.655
ENSMUSG00000003680	0.143	0.245	0.392	0.238	0.198	0.237	0.293
ENSMUSG00000003721	2.2	2.102	1.882	2.529	2.489	1.731	2.472
ENSMUSG00000003731	0.554	0.479	0.631	0.683	0.674	0.964	0.463
ENSMUSG00000003746	0.008	0.006	0.017	0.018	0.011	0.027	0.032
ENSMUSG00000003752	0.867	0.963	1.072	1.04	0.943	1.052	1.093
ENSMUSG00000003762	0.447	0.513	0.464	0.578	0.568	0.529	0.634
ENSMUSG00000003778	16.924	22.087	17.694	16.003	14.236	12.876	15.924
ENSMUSG00000003779	3.645	7.237	5.198	0.99	0.704	1.117	1.438
ENSMUSG00000003808	16.331	15.051	15.542	15.151	14.24	17.632	15.374
ENSMUSG00000003809	5.937	7.133	4.85	5.859	6.139	5.438	5.671
ENSMUSG00000003810	0.635	0.683	0.76	0.601	0.679	0.599	0.528
ENSMUSG00000003812	0.138	0.464	0.386	0.23	0.431	0.162	0.472
ENSMUSG00000003813	12.995	14.352	14.453	11.377	11.977	12.927	9.686
ENSMUSG00000003814	85.161	95.867	90.386	82.12	101.12	79.47	82.416
ENSMUSG00000003824	2.646	3.203	1.839	3.269	3.247	1.927	3.786
ENSMUSG00000003847	0.157	0.172	0.267	0.258	0.204	0.254	0.305
ENSMUSG00000003848	9.119	11.014	9.835	9.91	10.437	11.02	8.952
ENSMUSG00000003849	0.098	0.166	0.153	0.15	0.184	0.196	0.136
ENSMUSG00000003863	0.263	0.225	0.23	0.398	0.297	0.425	0.429
ENSMUSG00000003865	2.009	1.765	1.431	1.832	1.55	1.358	1.452
ENSMUSG00000003868	10.704	8.855	10.679	9.372	10.171	12.497	9.743
ENSMUSG00000003872	0.42	0.406	0.429	0.449	0.214	0.96	0.085
ENSMUSG00000003873	40.346	37.961	42.892	46.767	43.336	45.567	44.281
ENSMUSG00000003923	4.78	3.646	4.571	3.535	3.124	3.29	5.199
ENSMUSG00000003929	4.478	4.077	4.359	4.8	4.302	3.885	4.153
ENSMUSG00000003934	3.43	3.321	3.752	5.129	3.174	4.498	4.212
ENSMUSG00000003948	0.086	0.092	0.117	0.186	0.113	0.097	0.162
ENSMUSG00000003949	0.014	0.006	0.004	0.033	0.038	0.043	0.029
ENSMUSG00000003955	0.543	0.717	0.667	0.564	0.347	0.437	0.465
ENSMUSG00000003970	252.546	248.908	267.37	251.296	229.172	224.567	231.606
ENSMUSG00000003974	0.004	0.001	0.004	0.003	0.007	0.004	0.001
ENSMUSG00000003992	0.992	0.579	0.686	0.901	0.754	0.597	0.593
ENSMUSG00000004018	0.106	0.08	0.099	0.128	0.092	0.1	0.071
ENSMUSG00000004031	0.229	0.192	0.176	0.107	0.169	0.133	0.242
ENSMUSG00000004032	28.911	35.701	37.763	39.586	33.226	31.011	35.951
ENSMUSG00000004035	20.127	19.94	21.074	16.963	16.702	20.862	16.52
ENSMUSG00000004038	0	0.028	0.051	0.054	0.017	0.022	0.081
ENSMUSG00000004040	0.079	0.085	0.163	0.234	0.22	0.317	0.232
ENSMUSG00000004043	0.043	0.054	0.1	0.779	0.449	0.748	0.551
ENSMUSG00000004044	0.183	0.515	0.243	0.085	0.128	0.432	0.112
ENSMUSG00000004054	0.019	0.028	0.056	0.24	0.159	0.125	0.082
ENSMUSG00000004056	1.751	1.618	2.064	1.772	2.102	2.292	2.182
ENSMUSG00000004069	0.419	0.38	0.515	0.669	0.499	0.449	0.577
ENSMUSG00000004070	1.389	1.232	1.254	1.434	1.514	1.174	1.063
ENSMUSG00000004071	5.15	5.676	5.075	4.867	5.997	5.541	5.581
ENSMUSG00000004085	0.01	0.014	0.02	0.039	0.019	0.029	0.026
ENSMUSG00000004096	18.824	19.94	19.806	19.746	18.122	18.074	16.396
ENSMUSG00000004098	0.015	0	0.015	0.073	0.059	0.092	0.085
ENSMUSG00000004099	4.204	4.438	4.49	3.11	4.002	4.542	3.597
ENSMUSG00000004100	4.526	4.142	6.232	5.621	5.06	5.648	6.151
ENSMUSG00000004105	0.071	0.154	0.223	0.152	0.036	0.066	0.128
ENSMUSG00000004110	0.018	0.007	0.01	0.031	0.019	0.019	0.019
ENSMUSG00000004113	0.121	0.075	0.103	0.173	0.128	0.117	0.105
ENSMUSG00000004127	0.627	1.178	0.992	1.081	1.08	0.739	0.731
ENSMUSG00000004151	0.034	0.076	0.112	0.047	0.015	0.028	0.013
ENSMUSG00000004187	1.028	0.697	0.81	1.767	1.498	1.456	1.734
ENSMUSG00000004207	3.749	3.05	1.964	4.872	6.105	5.677	2.985
ENSMUSG00000004221	1.295	1.452	1.278	1.347	1.338	1.053	1.156
ENSMUSG00000004231	0.012	0.004	0.007	0.017	0.006	0.012	0.025
ENSMUSG00000004233	0.102	0.104	0.149	0.147	0.101	0.128	0.122
ENSMUSG00000004263	1.598	1.114	1.47	1.427	2.544	2.36	1.648
ENSMUSG00000004264	13.726	7.154	5.054	3.869	8.574	13.243	14.393
ENSMUSG00000004266	0.005	0.047	0.016	0.225	0.132	0.176	0.088
ENSMUSG00000004267	4.763	3.198	3.736	2.978	3.598	5.602	3.874
ENSMUSG00000004268	19.35	23.706	22.462	21.187	15.076	12.654	21.24
ENSMUSG00000004270	0.586	0.44	0.524	0.526	0.522	0.726	0.442
ENSMUSG00000004285	56.512	59.82	61.23	75.062	57.589	46.67	66.049
ENSMUSG00000004296	0.037	0.006	0.048	0.086	0.157	0.131	0.081
ENSMUSG00000004317	0.078	0.082	0.07	0.14	0.117	0.164	0.172
ENSMUSG00000004319	1.119	0.705	0.827	0.969	1.153	1.162	0.908
ENSMUSG00000004328	0.081	0.05	0.059	0.146	0.12	0.166	0.058
ENSMUSG00000004341	0.058	0.021	0.052	0.142	0.116	0.264	0.579
ENSMUSG00000004344	0.37	0.197	0.409	0.952	0.739	0.892	0.609
ENSMUSG00000004347	0.036	0.041	0.036	0.027	0.032	0.041	0.021
ENSMUSG00000004356	0.246	0.237	0.248	0.269	0.228	0.203	0.234
ENSMUSG00000004359	0.059	0.008	0.009	0.41	0.204	0.477	0.176
ENSMUSG00000004360	18.716	15.861	17.486	19.497	19.341	20.928	17.292
ENSMUSG00000004364	0.392	0.617	0.582	0.463	0.505	0.482	0.631
ENSMUSG00000004366	0	0.798	0	1.782	0	0	0.179
ENSMUSG00000004371	0.099	0.067	0.128	0.286	0.317	0.513	0.345
ENSMUSG00000004383	0.035	0.028	0.023	0.039	0.036	0.046	0.045
ENSMUSG00000004393	17.845	18.179	17.252	16.505	16.682	16.883	14.849
ENSMUSG00000004394	71.751	80.499	77.143	73.225	75.258	66.467	70.257
ENSMUSG00000004415	0.021	0.007	0.006	0.112	0.065	0.079	0.021
ENSMUSG00000004446	1.613	1.502	1.507	1.8	1.438	1.682	1.459
ENSMUSG00000004451	0.728	0.775	0.654	1.148	0.888	0.978	1.238
ENSMUSG00000004455	0.218	0.233	0.343	0.327	0.308	0.237	0.359
ENSMUSG00000004460	2.578	2.223	2.856	3.718	2.75	2.872	2.685
ENSMUSG00000004462	0.984	0.931	1.084	0.998	0.89	0.617	1.176
ENSMUSG00000004473	0.409	0.294	0.703	0.712	0.316	0.377	0.268
ENSMUSG00000004500	2.147	2.058	1.343	2.876	2.933	2.896	2.932
ENSMUSG00000004508	0.069	0.049	0.072	0.082	0.06	0.097	0.051
ENSMUSG00000004530	3.972	3.878	4.111	4.494	4.474	4.271	4.063
ENSMUSG00000004535	7.722	7.196	7.298	7.25	7.921	7.759	7.881
ENSMUSG00000004542	0	0	0	0.05	0.011	0.014	0
ENSMUSG00000004552	0.019	0.01	0.033	0.044	0.041	0.023	0.03
ENSMUSG00000004558	5.691	10.675	13.26	10.005	10.196	6.41	7.972
ENSMUSG00000004561	6.231	6.92	5.807	7.064	4.525	5.427	6.007
ENSMUSG00000004562	0.092	0.169	0.164	0.39	0.274	0.358	0.115
ENSMUSG00000004565	1.425	1.105	1.261	1.028	0.909	1.054	1.509
ENSMUSG00000004567	0.438	0.477	0.336	0.67	0.393	0.496	0.459
ENSMUSG00000004568	0.202	0.212	0.176	0.328	0.268	0.282	0.348
ENSMUSG00000004591	0.144	0.154	0.144	0.15	0.116	0.169	0.139
ENSMUSG00000004609	0	0.027	0.019	0.037	0	0	0.034
ENSMUSG00000004610	6.378	6.366	7.769	6.081	6.877	5.613	6.406
ENSMUSG00000004612	0.073	0	0	0.128	0	0.312	0
ENSMUSG00000004626	6.432	6.882	6.38	8.028	7.33	7.377	6.96
ENSMUSG00000004630	0.079	0.036	0	0	0	0.056	0
ENSMUSG00000004631	0.612	0.543	0.476	0.714	0.731	0.592	0.524
ENSMUSG00000004633	0.016	0.02	0.019	0.039	0.033	0.025	0.035
ENSMUSG00000004637	0.017	0.02	0.019	0.017	0.017	0.022	0.022
ENSMUSG00000004642	3.628	4.265	3.813	3.235	2.995	2.961	3.371
ENSMUSG00000004651	0	0.001	0.004	0.002	0.006	0.004	0.007
ENSMUSG00000004654	0.007	0.006	0.016	0.012	0.023	0	0.111
ENSMUSG00000004655	0.014	0	0	0	0.008	0	0.037
ENSMUSG00000004661	0.693	0.969	0.918	0.982	0.79	0.711	1.094
ENSMUSG00000004665	0.046	0.425	0.243	1.926	0.738	1.716	0.302
ENSMUSG00000004667	43.679	47.225	51.664	46.066	41.293	36.129	42.168
ENSMUSG00000004668	0.003	0.005	0.005	0.024	0.022	0.022	0.024
ENSMUSG00000004677	0.126	0.128	0.177	0.162	0.149	0.231	0.236
ENSMUSG00000004698	0.167	0.219	0.205	0.09	0.193	0.075	0.155
ENSMUSG00000004707	0.018	0.004	0.015	0.04	0.03	0.02	0.024
ENSMUSG00000004709	0.041	0.017	0.062	0.098	0.077	0.102	0.161
ENSMUSG00000004730	0.008	0.039	0.015	0.046	0.025	0.027	0.027
ENSMUSG00000004748	1.501	0.958	1.35	0.946	1.319	1.479	2.222
ENSMUSG00000004768	1.058	0.523	0.624	1.025	1.187	1.186	1.624
ENSMUSG00000004771	5.732	2.96	2.426	2.004	3.497	4.07	4.526
ENSMUSG00000004788	9.175	9.66	9.615	12.426	8.223	8.601	9.766
ENSMUSG00000004789	4.663	4.891	4.352	4.592	4.416	4.923	3.399
ENSMUSG00000004791	0.243	0.487	0.287	0.662	0.571	0.505	0.636
ENSMUSG00000004798	0.494	0.383	0.693	0.621	0.5	0.58	0.529
ENSMUSG00000004814	0.139	0.174	0.123	0.723	1.039	0.864	0.581
ENSMUSG00000004815	0.297	0.347	0.333	0.424	0.215	0.399	0.403
ENSMUSG00000004821	0	0	0.005	0.008	0.01	0.047	0
ENSMUSG00000004837	0	0.02	0.005	0.008	0.039	0.044	0.012
ENSMUSG00000004842	0.155	0.086	0.086	0.642	0.492	0.717	0.405
ENSMUSG00000004843	0.403	0.398	0.316	0.255	0.367	0.405	0.364
ENSMUSG00000004846	1.084	0.958	1.578	1.231	1.225	1.561	1.666
ENSMUSG00000004849	14.372	11.955	15.938	19.509	14.253	16.968	15.59
ENSMUSG00000004864	0.037	0.017	0.01	0.096	0.061	0	0.024
ENSMUSG00000004865	14.662	16.92	13.969	17.267	15.192	15.244	14.593
ENSMUSG00000004872	0.021	0.01	0.02	0.085	0.039	0.091	0.052
ENSMUSG00000004880	3.419	5.268	4.591	2.929	3.222	2.928	2.535
ENSMUSG00000004885	0.366	0.28	0.345	0.287	0.505	0.363	0.24
ENSMUSG00000004891	1.28	1.844	2.57	1.585	0.933	1.147	1.856
ENSMUSG00000004892	0.014	0.037	0.023	0.035	0.06	0.087	0.053
ENSMUSG00000004894	0.089	0.066	0.082	0.437	0.163	0.356	0.31
ENSMUSG00000004895	0.281	0.371	0.361	0.23	0.31	0.329	0.262
ENSMUSG00000004896	5.656	6.578	5.299	7.116	6.257	6.671	6.345
ENSMUSG00000004897	5.699	6.2	6.049	4.358	5.816	6.776	6.538
ENSMUSG00000004902	0.008	0.071	0.06	0.072	0.05	0.077	0.076
ENSMUSG00000004929	1.791	0.643	1.381	1.102	1.412	1.864	1.731
ENSMUSG00000004931	0.816	0.55	0.377	1.153	0.637	0.867	0.49
ENSMUSG00000004933	1.001	0.735	0.476	1.41	0.976	1.476	0.888
ENSMUSG00000004934	0.965	1.068	0.796	1.617	1.395	1.634	1.757
ENSMUSG00000004936	0.058	0.053	0.065	0.13	0.147	0.106	0.143
ENSMUSG00000004937	35.621	34.867	34.365	32.485	40.955	40.891	36.302
ENSMUSG00000004939	0.045	0.1	0	1.009	0.443	0.695	0.818
ENSMUSG00000004945	1.245	1.281	1.437	1.363	1.178	1.065	1.13
ENSMUSG00000004947	0.258	0.157	0.296	0.315	0.33	0.437	0.267
ENSMUSG00000004948	0.111	0.073	0.034	1.073	0.535	0.702	0.768
ENSMUSG00000004951	0	0.047	0	0.091	0	0.149	0.55
ENSMUSG00000004952	0.04	0.072	0.079	0.188	0.153	0.192	0.194
ENSMUSG00000004961	8.843	5.471	8.247	10.746	9.576	11.127	10.399
ENSMUSG00000004980	229.48	243.907	213.746	214.379	230.909	228.791	190.137
ENSMUSG00000004988	0.48	0.937	1.087	2.069	1.335	2.011	2.569
ENSMUSG00000004994	3.099	2.734	2.81	2.515	2.584	2.331	3.069
ENSMUSG00000004996	0.43	0.647	0.58	1.274	0.666	0.856	0.548
ENSMUSG00000005034	2.106	1.797	1.869	1.298	1.587	1.695	1.451
ENSMUSG00000005043	0.085	0.23	0.047	0.087	0.086	0.071	0.28
ENSMUSG00000005045	0.146	0.173	0.111	0.244	0.269	0.268	0.342
ENSMUSG00000005054	34.265	29.698	38.936	36.715	31.227	23.012	32.218
ENSMUSG00000005057	0.191	0.303	0.454	0.391	0.392	0.555	0.334
ENSMUSG00000005069	2.293	1.46	1.922	1.619	2.704	2.685	3.193
ENSMUSG00000005078	5.268	4.95	5.209	6.455	5.968	5.451	7.03
ENSMUSG00000005087	0.015	0.018	0.041	0.086	0.063	0.139	0.092
ENSMUSG00000005089	0.029	0.025	0.03	0.07	0.075	0.074	0.084
ENSMUSG00000005102	0.085	0.064	0.119	0.189	0.109	0.157	0.18
ENSMUSG00000005103	1.228	2.213	1.457	1.784	2.144	1.45	1.594
ENSMUSG00000005107	0.002	0.001	0.004	0.023	0.012	0.029	0.015
ENSMUSG00000005124	0.065	0.039	0.018	0.113	0.087	0.172	0.085
ENSMUSG00000005125	2.315	0.994	1.299	1.723	1.967	2	1.647
ENSMUSG00000005131	0.013	0	0.003	0.022	0.014	0.049	0.025
ENSMUSG00000005142	1.071	1.347	1.18	1.872	1.119	1.122	1.329
ENSMUSG00000005148	0.012	0.063	0.045	0.061	0.09	0.1	0.061
ENSMUSG00000005150	8.09	7.142	7.072	7.129	7.643	7.269	6.88
ENSMUSG00000005161	300.989	298.53	299.82	325.593	282.608	235.358	313.911
ENSMUSG00000005198	3.757	3.874	3.735	2.898	3.678	3.631	3.025
ENSMUSG00000005202	0.195	0	0.339	1.5	0.859	2.365	2.477
ENSMUSG00000005204	3.665	3.387	4.71	4.934	4.4	5.505	4.936
ENSMUSG00000005220	0.001	0.005	0.007	0.012	0.014	0.022	0.011
ENSMUSG00000005225	0.197	0.228	0.185	0.343	0.279	0.325	0.321
ENSMUSG00000005233	2.483	5.135	3.738	1.244	0.719	0.497	0.808
ENSMUSG00000005237	0.015	0.01	0.01	0.097	0.084	0.104	0.1
ENSMUSG00000005251	0.103	0.053	0.031	0.083	0.109	0.039	0.207
ENSMUSG00000005262	9.399	11.117	10.326	9.621	10.218	9.665	9.677
ENSMUSG00000005267	0.676	0.639	0.657	0.813	0.699	0.779	1.088
ENSMUSG00000005268	0.027	0.017	0.029	0.133	0.079	0.115	0.08
ENSMUSG00000005299	0.56	0.555	0.492	0.904	0.639	0.722	0.796
ENSMUSG00000005312	1.625	1.65	1.897	1.629	1.529	1.429	1.35
ENSMUSG00000005320	0.005	0.019	0.018	0.307	0.059	0.167	0.056
ENSMUSG00000005338	0.278	0.218	0.147	0.126	0.185	0.27	0.184
ENSMUSG00000005339	0.015	0	0	0	0.08	0.144	0
ENSMUSG00000005354	21.17	21.466	23.532	23.149	22.986	23.235	22.055
ENSMUSG00000005355	0	0	0	0.048	0.03	0.039	0
ENSMUSG00000005357	0.025	0	0.008	0.017	0.008	0.039	0.02
ENSMUSG00000005360	1.707	2.902	2.217	1.159	1.04	0.847	1.197
ENSMUSG00000005362	5.309	4.842	5.073	4.574	4.603	3.548	4.557
ENSMUSG00000005364	0.007	0.008	0.007	0.054	0.034	0.041	0.018
ENSMUSG00000005370	0.937	1.131	1.099	1.194	1.309	1.358	1.384
ENSMUSG00000005371	0.756	0.906	0.835	0.832	0.945	0.938	0.956
ENSMUSG00000005373	0.014	0.013	0.034	0.09	0.071	0.071	0.089
ENSMUSG00000005374	1.506	1.665	1.365	1.761	1.571	1.753	1.683
ENSMUSG00000005378	5.758	5.811	6.076	5.975	6.196	5.987	5.138
ENSMUSG00000005397	0.002	0.011	0.006	0.098	0.033	0.074	0.06
ENSMUSG00000005410	4.083	7.035	5.766	2.269	2.449	1.868	1.672
ENSMUSG00000005413	0.246	0.155	0.3	0.3	0.258	0.227	0.097
ENSMUSG00000005417	0.831	0.836	0.887	0.908	0.892	0.929	1.066
ENSMUSG00000005442	0.512	0.483	0.491	0.675	0.554	0.55	0.615
ENSMUSG00000005447	73.208	62.237	69.216	79.631	69.097	77.02	83.214
ENSMUSG00000005465	0.056	0.057	0.039	0.354	0.333	0.388	0.257
ENSMUSG00000005469	0.879	1.07	1.169	1.247	1.208	1.495	1.29
ENSMUSG00000005470	0.764	1.319	1.132	0.194	0.343	0.349	0.338
ENSMUSG00000005474	0	0	0	0	0.036	0.215	0
ENSMUSG00000005481	11.607	14.545	11.927	10.385	9.562	9.044	11.511
ENSMUSG00000005483	21.599	18.337	19.976	21.655	20.948	24.298	27.091
ENSMUSG00000005493	0.019	0.019	0.02	0.055	0.066	0.062	0.051
ENSMUSG00000005501	0.573	0.491	0.594	0.49	0.454	0.551	0.573
ENSMUSG00000005503	0.106	0	0.02	0.154	0.078	0.15	0.046
ENSMUSG00000005505	17.993	21.268	17.294	18.888	18.119	17.428	19.813
ENSMUSG00000005506	1.067	1.176	1.139	1.231	1.176	1.176	1.139
ENSMUSG00000005510	6.205	6.074	7.173	5.755	6.381	6.103	7.069
ENSMUSG00000005514	1.761	1.371	1.522	1.16	1.445	1.494	1.218
ENSMUSG00000005533	0.047	0.034	0.057	0.053	0.057	0.072	0.055
ENSMUSG00000005534	0.091	0.075	0.12	0.135	0.136	0.154	0.173
ENSMUSG00000005540	0.069	0.012	0.123	0.458	0.291	0.246	0.2
ENSMUSG00000005547	0.042	0	0	0	0.012	0.015	0.027
ENSMUSG00000005553	0.259	0.256	0.215	0.113	0.064	0.174	0.051
ENSMUSG00000005566	9.527	9.592	12.816	11.181	8.193	11.239	10.895
ENSMUSG00000005575	3.254	3.831	4.483	3.519	3.466	3.602	3.938
ENSMUSG00000005580	0.01	0.015	0.022	0.083	0.04	0.043	0.07
ENSMUSG00000005583	3.635	2.136	3.239	2.025	2.006	2.606	1.79
ENSMUSG00000005609	7.472	8.366	6.9	6.996	8.308	7.357	7.313
ENSMUSG00000005610	352.678	365.315	355.485	307.316	344.85	363.136	305.591
ENSMUSG00000005611	0.004	0.011	0.006	0.085	0.041	0.088	0.081
ENSMUSG00000005615	1.894	1.65	1.812	1.563	1.745	1.91	1.392
ENSMUSG00000005621	0.216	0.272	0.327	0.262	0.375	0.323	0.333
ENSMUSG00000005625	22.249	23.246	22.024	22.563	22.154	22.766	24.25
ENSMUSG00000005628	0.237	0.311	0.424	0.856	0.583	0.904	0.907
ENSMUSG00000005640	0.041	0.012	0.035	0.047	0.02	0.032	0.024
ENSMUSG00000005649	0.008	0.007	0.009	0	0	0.045	0
ENSMUSG00000005656	5.414	5.781	5.726	5.857	5.436	4.977	5.547
ENSMUSG00000005667	1.92	2.652	2.576	1.833	2.027	1.807	1.519
ENSMUSG00000005672	1.512	1.044	0.956	1.241	0.753	0.515	0.395
ENSMUSG00000005674	2.096	1.799	2.572	2.445	2.062	2.199	1.598
ENSMUSG00000005677	0.077	0.058	0.156	0.401	0.155	0.563	0.268
ENSMUSG00000005681	0	0.351	0.072	0	0	0.184	0
ENSMUSG00000005682	5.946	7.064	6.438	4.794	4.918	3.967	5.865
ENSMUSG00000005683	17.139	17.933	18.881	16.16	17.39	18.078	14.7
ENSMUSG00000005686	0.016	0.067	0.024	0.031	0.052	0.03	0.061
ENSMUSG00000005687	24.284	26.915	27.969	24.766	25.487	22.99	29.381
ENSMUSG00000005696	0.067	0.043	0.064	0.14	0.117	0.25	0.092
ENSMUSG00000005698	1.748	1.708	1.718	1.799	1.908	2.012	2.242
ENSMUSG00000005699	13.132	13.483	14.056	11.545	11.181	9.823	15.258
ENSMUSG00000005705	0.006	0.002	0	0.006	0	0.007	0.01
ENSMUSG00000005716	0.023	0	0.038	0.079	0.031	0.056	0.103
ENSMUSG00000005718	0.275	0.314	0.273	0.408	0.417	0.576	0.375
ENSMUSG00000005732	19.073	17.848	15.317	11.015	11.946	14.655	16.055
ENSMUSG00000005774	0.254	0.217	0.192	0.261	0.254	0.294	0.302
ENSMUSG00000005779	29.573	22.1	29.225	29.553	29.345	27.74	31.109
ENSMUSG00000005800	0.163	0.27	0.266	0.582	0.539	0.498	0.449
ENSMUSG00000005802	0.282	0.181	0.245	0.49	0.311	0.297	0.316
ENSMUSG00000005803	0.008	0.003	0.002	0.017	0.026	0.022	0.01
ENSMUSG00000005804	5.803	5.12	5.906	5.688	4.776	5.58	5.25
ENSMUSG00000005813	1.429	1.453	1.12	1.576	1.369	1.62	1.589
ENSMUSG00000005823	3.139	3.032	2.493	2.593	2.735	2.189	3.159
ENSMUSG00000005824	0	0.033	0	0.064	0.061	0.078	0.048
ENSMUSG00000005836	0.013	0.012	0.006	0.032	0.078	0.052	0.116
ENSMUSG00000005846	31.361	36.406	34.241	30.044	28.389	28.049	30.194
ENSMUSG00000005864	0.042	0.042	0.104	0.253	0.166	0.24	0.184
ENSMUSG00000005871	1.51	1.315	1.35	1.899	1.637	1.69	1.035
ENSMUSG00000005873	1.903	1.364	1.662	1.846	1.73	2.014	1.655
ENSMUSG00000005881	24.239	23.472	24.795	27.558	24.81	23.477	25.007
ENSMUSG00000005882	1.072	0.967	0.975	1.052	1.109	1.124	1.172
ENSMUSG00000005883	0.027	0.005	0.012	0.028	0.03	0.023	0.043
ENSMUSG00000005886	0.083	0.089	0.086	0.107	0.1	0.098	0.11
ENSMUSG00000005891	0	0	0	0.041	0	0	0
ENSMUSG00000005892	0	0	0.111	0.464	0.661	0.519	0.262
ENSMUSG00000005893	0.255	0.385	0.402	0.373	0.352	0.33	0.395
ENSMUSG00000005897	0.225	0.202	0.249	0.326	0.28	0.33	0.344
ENSMUSG00000005899	3.905	4.1	3.313	3.645	4.147	4.174	4.159
ENSMUSG00000005907	0.501	0.548	0.488	0.59	0.702	0.606	0.543
ENSMUSG00000005917	1.74	1.763	2.585	1.66	2.385	2.329	2.444
ENSMUSG00000005936	12.261	11.276	11.432	10.246	13.082	14.617	10.037
ENSMUSG00000005947	0.009	0.01	0.013	0.084	0.043	0.067	0.068
ENSMUSG00000005949	3.139	4.57	3.329	3.127	3.349	2.84	3.466
ENSMUSG00000005950	0.063	0.038	0.07	0.098	0.085	0.08	0.074
ENSMUSG00000005951	0.017	0.034	0.042	0.084	0.057	0.098	0.108
ENSMUSG00000005952	0.003	0.003	0.043	0.095	0.035	0.091	0.075
ENSMUSG00000005958	0.023	0.054	0.108	0.081	0.041	0.013	0.292
ENSMUSG00000005968	0.062	0.072	0.064	0.088	0.035	0.09	0.147
ENSMUSG00000005973	0.152	0.184	0.279	0.15	0.131	0.113	0.139
ENSMUSG00000005980	3.667	4.023	3.38	2.239	3.548	2.736	3.371
ENSMUSG00000005981	2.653	2.857	2.507	2.144	2.236	2.328	2.315
ENSMUSG00000005982	2.641	2.135	2.761	2.514	2.847	3.062	2.328
ENSMUSG00000005983	0.473	0.149	0.241	1.177	0.563	1.095	0.652
ENSMUSG00000005986	0.919	0.712	0.443	0.556	1.116	0.905	0.61
ENSMUSG00000005994	0.044	0.066	0.022	0.205	0.124	0.222	0.244
ENSMUSG00000006005	2.246	2.12	1.907	2.617	2.337	2.28	1.863
ENSMUSG00000006007	0.018	0.005	0.026	0.104	0.013	0.16	0.016
ENSMUSG00000006010	1.646	1.546	1.654	1.638	1.239	1.562	1.614
ENSMUSG00000006014	0.062	0.023	0.023	0.116	0.051	0.117	0.054
ENSMUSG00000006019	0.378	0.146	0.353	0.392	0.267	0.511	0.572
ENSMUSG00000006021	3.668	2.796	3.599	5.157	3.993	3.881	4.327
ENSMUSG00000006024	19.704	20.879	19.945	19.085	20.562	18.409	18.24
ENSMUSG00000006050	7.917	8.24	7.165	7.522	7.362	6.465	8.244
ENSMUSG00000006056	0.041	0.018	0.038	0.226	0.188	0.271	0.25
ENSMUSG00000006057	17.514	17.968	19.709	18.659	16.347	17.889	18.884
ENSMUSG00000006058	1.169	1.532	1.28	1.65	0.804	1.257	1.999
ENSMUSG00000006095	33.014	27.955	29.197	36.081	35.92	34.001	37.04
ENSMUSG00000006127	8.115	7.791	6.991	7.885	7.626	7.278	7.578
ENSMUSG00000006134	1.609	1.529	1.885	1.515	2.048	1.772	1.786
ENSMUSG00000006143	0.018	0	0	0.061	0.058	0.162	0.138
ENSMUSG00000006154	0.057	0.039	0.116	0.098	0.058	0.21	0.103
ENSMUSG00000006169	0.2	0.298	0.302	0.264	0.169	0.217	0.166
ENSMUSG00000006179	0.034	0	0.025	0.02	0.025	0.145	0.03
ENSMUSG00000006191	0.057	0.079	0.06	0.05	0.06	0.063	0.055
ENSMUSG00000006204	0.006	0.003	0.006	0.035	0.012	0.021	0.024
ENSMUSG00000006205	0.002	0.003	0.021	0.045	0.019	0.062	0.041
ENSMUSG00000006215	3.269	2.989	2.628	3.351	2.958	3.245	4.163
ENSMUSG00000006216	0	0	0	0.013	0.049	0.094	0.019
ENSMUSG00000006218	0.011	0.005	0.006	0.009	0.006	0.015	0
ENSMUSG00000006219	0.261	0.175	0.041	0.33	0.288	0.48	0.308
ENSMUSG00000006221	0	0	0	0.066	0	0.027	0
ENSMUSG00000006235	0.018	0.033	0.02	0	0.081	0	0.145
ENSMUSG00000006241	0.267	0.304	0.228	0.696	0.351	0.422	0.538
ENSMUSG00000006262	0.631	0.57	0.633	0.432	0.548	0.755	0.74
ENSMUSG00000006269	0.005	0.005	0.012	0.066	0.018	0.031	0.1
ENSMUSG00000006270	0	0.02	0	0.116	0.074	0.095	0.117
ENSMUSG00000006273	9.408	8.826	9.75	10.073	9.842	9.108	10.913
ENSMUSG00000006276	2.088	1.862	1.988	1.737	1.799	2.134	1.805
ENSMUSG00000006281	0.072	0.048	0.08	0.229	0.147	0.271	0.155
ENSMUSG00000006288	11.846	13.583	13.036	12.037	11.415	9.599	10.753
ENSMUSG00000006289	3.256	3.11	3.69	3.373	3.088	3.285	3.655
ENSMUSG00000006299	66.481	59.863	62.11	56.019	62.926	67.093	56.631
ENSMUSG00000006301	0.154	0.138	0.242	0.294	0.323	0.324	0.416
ENSMUSG00000006304	4.324	3.864	3.993	4.207	4.656	5.063	4.999
ENSMUSG00000006307	0.934	1.049	1.169	1.495	1.125	1.163	1.273
ENSMUSG00000006310	0.037	0.017	0.041	0.293	0.155	0.437	0.098
ENSMUSG00000006311	0	0	0.085	0.47	0.043	0.109	0
ENSMUSG00000006313	0.062	0.04	0.108	0.138	0	0.05	0.116
ENSMUSG00000006315	49.076	48.16	57.428	53.595	59.364	51.236	60.062
ENSMUSG00000006333	297.527	299.246	346.194	308.867	271.177	239.705	323.647
ENSMUSG00000006335	1.877	1.589	2.328	2.53	2.208	1.947	2.446
ENSMUSG00000006342	0.222	0.094	0.297	1.624	0.991	1.588	1.528
ENSMUSG00000006344	0.025	0.047	0.021	0.312	0.147	0.29	0.203
ENSMUSG00000006345	0.014	0.038	0.008	0.171	0.085	0.065	0.129
ENSMUSG00000006356	97.021	86.235	92.183	99.148	114.658	114.626	91.165
ENSMUSG00000006360	0.445	0.184	0.455	0.536	0.201	0.259	0.06
ENSMUSG00000006362	0.178	0.258	0.163	0.164	0.223	0.295	0.148
ENSMUSG00000006369	0.049	0.04	0.056	0.076	0.052	0.073	0.053
ENSMUSG00000006373	23.146	19.733	22.883	21.97	23.373	24.836	27.6
ENSMUSG00000006378	2.286	2.346	2.411	3.04	2.437	2.062	2.012
ENSMUSG00000006386	0.004	0.014	0.007	0.012	0.006	0.031	0
ENSMUSG00000006389	0.034	0.01	0.019	0.089	0.183	0.186	0.06
ENSMUSG00000006390	1.829	2.583	2.576	2.099	2.465	1.987	2.231
ENSMUSG00000006392	20.108	22.831	22.096	18.202	18.06	15.037	21.449
ENSMUSG00000006395	0.721	1.801	2.915	1.525	1.416	0.976	1.312
ENSMUSG00000006398	2.035	2.524	3.607	1.045	0.855	1.071	1.167
ENSMUSG00000006403	1.056	1.168	1.132	1.88	2.104	2.787	1.282
ENSMUSG00000006411	0.005	0.038	0	0.065	0.046	0.106	0.024
ENSMUSG00000006412	6.199	5.67	6.775	6.781	6.847	7.44	6.884
ENSMUSG00000006418	11.684	11.708	11.91	11.458	10.966	12.373	12.269
ENSMUSG00000006423	0.659	0.725	0.74	0.762	0.597	0.66	0.538
ENSMUSG00000006435	0.012	0.009	0.019	0.002	0.013	0.026	0.025
ENSMUSG00000006442	2.868	2.642	2.519	3.052	3.379	4.027	2.977
ENSMUSG00000006445	0.003	0	0.003	0.032	0.01	0.022	0.032
ENSMUSG00000006456	4.593	3.768	4.535	3.647	4.375	6.185	5.369
ENSMUSG00000006457	0.01	0.009	0.017	0.108	0.12	0.146	0.054
ENSMUSG00000006462	0.014	0.008	0.003	0.118	0.05	0.087	0.006
ENSMUSG00000006463	2.629	1.128	1.591	2.876	2.417	2.543	3.592
ENSMUSG00000006464	0.376	0.255	0.397	0.646	0.458	0.458	0.458
ENSMUSG00000006469	0	0.043	0	0.082	0.017	0.089	0.041
ENSMUSG00000006471	2.989	2.594	3.328	2.933	3.056	3.873	3.045
ENSMUSG00000006476	3.593	2.954	4.45	4.874	3.658	4.329	4.61
ENSMUSG00000006488	0.019	0	0	0.049	0.042	0.013	0
ENSMUSG00000006490	0	0.012	0	0.182	0	0.056	0.034
ENSMUSG00000006494	0.242	0.182	0.153	0.289	0.155	0.339	0.273
ENSMUSG00000006498	7.724	9.858	10.718	5.961	7.677	7.821	5.961
ENSMUSG00000006517	6.041	4.156	5.165	7.038	5.255	7.512	5.471
ENSMUSG00000006519	0.285	0.379	0.48	0.404	0.221	0.09	0.138
ENSMUSG00000006522	0.011	0.005	0.031	0.237	0.056	0.193	0.059
ENSMUSG00000006526	0.111	0.13	0.058	0.196	0.144	0.224	0.281
ENSMUSG00000006527	0.224	0.207	0.212	0.216	0.194	0.231	0.26
ENSMUSG00000006529	0.006	0.005	0.014	0.032	0.02	0.13	0.064
ENSMUSG00000006538	0.081	0.024	0.316	0.283	0.404	0.135	0.071
ENSMUSG00000006542	0.008	0.008	0	0	0	0.012	0.044
ENSMUSG00000006567	0.248	0.145	0.228	0.278	0.228	0.219	0.221
ENSMUSG00000006570	0.097	0.044	0.134	0.464	0.642	0.619	0.889
ENSMUSG00000006574	0.01	0.013	0.005	0.078	0.027	0.014	0.013
ENSMUSG00000006575	1.433	1.355	1.452	1.426	1.725	1.829	2.197
ENSMUSG00000006576	0.906	0.877	0.985	1.575	1.489	1.637	2.215
ENSMUSG00000006585	0.337	0.303	0.86	0.147	0.074	0.191	0.044
ENSMUSG00000006586	11.255	6.021	8.487	11.581	8.797	8.99	9.876
ENSMUSG00000006587	0.013	0.012	0.015	0.162	0.059	0.094	0
ENSMUSG00000006589	55.874	52.773	64.46	58.024	55.718	53.729	47.762
ENSMUSG00000006599	1.586	1.329	1.222	1.289	1.775	1.844	1.28
ENSMUSG00000006611	0.02	0.018	0.022	0.136	0.065	0.042	0
ENSMUSG00000006638	0.034	0.015	0.019	0	0.019	0	0
ENSMUSG00000006641	1.259	1.467	1.906	1.164	1.151	1.517	1.385
ENSMUSG00000006642	0	0	0	0	0.011	0.044	0
ENSMUSG00000006649	0.009	0.003	0.007	0.031	0.026	0.093	0.031
ENSMUSG00000006651	4.587	4.809	6.077	6.184	5.29	6.74	6.528
ENSMUSG00000006673	3.813	4.098	4.107	3.484	4.115	4.335	3.678
ENSMUSG00000006675	0.28	0.173	0.259	0.527	0.248	0.182	0.408
ENSMUSG00000006676	1.669	1.393	1.735	2.57	1.84	2.333	2.579
ENSMUSG00000006678	0.032	0.05	0.034	0.055	0.03	0.054	0.046
ENSMUSG00000006699	17.965	18.043	17.487	17.142	16.767	17.626	17.358
ENSMUSG00000006705	1.168	1.162	1.356	1.454	1.433	1.742	1.378
ENSMUSG00000006711	0.02	0	0.029	0.139	0.122	0.235	0.109
ENSMUSG00000006715	1.481	2.26	1.821	1.221	0.717	0.715	0.964
ENSMUSG00000006717	1.068	1.285	1.458	0.962	0.918	0.865	1.199
ENSMUSG00000006720	5.413	5.627	3.431	4.801	3.911	3.475	4.594
ENSMUSG00000006724	0.073	0.196	0.08	0.347	0	0.051	0.095
ENSMUSG00000006728	211.769	217.072	227.452	196.944	204.2	193.4	200.539
ENSMUSG00000006731	1.561	0.561	1.024	1.002	0.874	1.582	2.044
ENSMUSG00000006732	5.333	6.839	7.432	5.878	6.742	7.06	5.794
ENSMUSG00000006736	44.987	55.272	50.287	50.498	48.356	41.138	45.344
ENSMUSG00000006740	3.502	3.267	2.593	2.543	3.465	4.144	3.807
ENSMUSG00000006763	2.19	2.191	2.457	2.219	2.162	2.425	2.08
ENSMUSG00000006764	0.001	0.007	0.007	0.018	0.012	0.007	0.002
ENSMUSG00000006777	0	0.005	0	0.049	0.013	0.016	0.06
ENSMUSG00000006782	0.221	0.267	0.369	1.667	0.723	0.676	1.745
ENSMUSG00000006784	0.048	0.063	0.085	0.378	0.282	0.394	0.276
ENSMUSG00000006800	0.074	0.032	0.038	0.147	0.089	0.166	0.082
ENSMUSG00000006818	14.159	10.801	13.462	12.506	14.422	14.943	12.678
ENSMUSG00000006850	0.895	0.645	0.548	0.574	1.13	0.701	1.511
ENSMUSG00000006906	2.429	2.46	2.25	2.267	2.31	2.691	1.913
ENSMUSG00000006920	1.125	1.399	1.092	1.184	1.283	1.141	1.374
ENSMUSG00000006930	0.098	0.114	0.261	0.256	0.227	0.25	0.026
ENSMUSG00000006931	0.054	0.073	0.12	0.188	0.373	0.46	0.319
ENSMUSG00000006932	3.802	4.078	4.881	4.967	4.036	3.507	4.454
ENSMUSG00000006941	96.872	111.972	94.204	65.277	73.918	73.972	86.831
ENSMUSG00000006948	0	0	0	0	0.041	0.053	0
ENSMUSG00000006958	0.308	0.117	0.083	0.373	0.226	0.317	0.366
ENSMUSG00000006998	54.43	55.154	54.304	48.989	52.052	55.619	49.853
ENSMUSG00000007021	30.073	18.483	22.267	30.17	27.964	32.117	24.896
ENSMUSG00000007029	1.294	0.748	1.427	1.37	1.147	1.57	1.723
ENSMUSG00000007030	0.068	0.053	0.075	0.162	0.047	0.12	0.067
ENSMUSG00000007033	0.21	0.247	0.276	0.296	0.405	0.427	0.377
ENSMUSG00000007035	0.081	0.107	0.084	0.174	0.173	0.168	0.261
ENSMUSG00000007036	3.143	3.405	4.896	3.41	3.305	4.105	5.184
ENSMUSG00000007038	4.7	3.281	4.982	6.448	6.212	6.63	6.824
ENSMUSG00000007039	135.174	109.899	158.353	115.405	146.934	170.654	140.029
ENSMUSG00000007041	9.46	10.207	11.437	7.669	8.337	6.442	6.121
ENSMUSG00000007050	1.713	2.558	2.254	1.862	1.581	2.245	1.346
ENSMUSG00000007080	0.17	0.273	0.381	0.399	0.255	0.363	0.283
ENSMUSG00000007097	0.167	0.559	0.566	0.216	0.227	0.125	0.146
ENSMUSG00000007107	0.02	0.002	0.005	0.021	0.03	0.021	0.019
ENSMUSG00000007122	0.277	0.505	0.527	0.241	0.133	0.172	0.317
ENSMUSG00000007207	1.881	1.86	1.481	2.309	1.949	2.142	2.535
ENSMUSG00000007209	0	0.074	0	0.036	0.068	0.058	0.107
ENSMUSG00000007216	1.015	0.652	0.42	0.333	0.665	1.045	0.736
ENSMUSG00000007279	0.012	0.005	0.02	0.101	0.058	0.126	0.148
ENSMUSG00000007338	16.456	17.618	16.559	15.872	16.384	15.658	19.074
ENSMUSG00000007379	0.066	0.038	0.044	0.17	0.11	0.122	0.172
ENSMUSG00000007411	0.332	0.309	0.36	0.367	0.3	0.339	0.5
ENSMUSG00000007415	10.125	10.195	9.71	9.767	10.363	9.76	9.332
ENSMUSG00000007440	0.489	0.369	0.346	0.407	0.433	0.445	0.402
ENSMUSG00000007457	0.304	0.023	0.252	0.484	0.279	0.43	0.53
ENSMUSG00000007458	8.426	12.133	10.528	8.07	9.86	9.302	11.319
ENSMUSG00000007476	27.127	29.494	26.255	24.049	28.195	26.795	26.265
ENSMUSG00000007480	0	0	0.227	1.067	0.226	0.116	0.964
ENSMUSG00000007564	40.689	39.911	42.084	39.068	42.188	45.272	36.526
ENSMUSG00000007570	0.066	0.131	0.139	0.265	0.284	0.234	0.346
ENSMUSG00000007589	3.219	3.656	5.558	3.676	4.104	4.291	2.809
ENSMUSG00000007591	0	0.033	0.122	0	0.081	0.363	0.479
ENSMUSG00000007594	0	0.074	0.052	0.082	0.052	0.083	0.062
ENSMUSG00000007603	14.975	14.392	14.852	16.487	15.295	15.399	20.131
ENSMUSG00000007610	0.135	0.067	0.067	0.144	0.157	0.117	0.157
ENSMUSG00000007613	1.344	0.972	0.959	0.929	1.147	1.802	1.065
ENSMUSG00000007617	0.156	0.124	0.208	0.359	0.183	0.181	0.234
ENSMUSG00000007646	0.457	0.471	0.513	0.397	0.366	0.298	0.319
ENSMUSG00000007653	0.068	0.036	0.028	0.066	0.066	0.044	0.045
ENSMUSG00000007655	0.015	0.004	0.03	0.073	0.019	0.09	0.039
ENSMUSG00000007656	18.998	18.686	19.621	17.15	17.789	17.363	19.534
ENSMUSG00000007659	10.566	9.069	10.819	10.874	10.851	11.788	9.83
ENSMUSG00000007670	20.685	32.792	31.739	22.038	27.958	23.321	25.422
ENSMUSG00000007682	0.019	0.1	0.069	0	0.021	0.114	0.179
ENSMUSG00000007721	22.771	18.124	23.589	23.316	25.387	27.145	26.266
ENSMUSG00000007739	30.905	28.649	33.052	37.015	31.725	30.098	35.974
ENSMUSG00000007777	19.146	17.35	17.427	16.473	13.905	11.107	22.73
ENSMUSG00000007783	8.005	7.009	7.249	6.639	6.734	8.03	7.457
ENSMUSG00000007805	0.002	0.003	0	0.003	0.008	0	0.005
ENSMUSG00000007812	7.517	6.925	5.709	7.151	6.315	6.014	5.71
ENSMUSG00000007815	2.968	3.416	3.672	3.396	3.349	3.347	3.082
ENSMUSG00000007817	0.624	0.68	0.674	0.68	0.807	0.81	0.582
ENSMUSG00000007827	0.759	0.932	0.868	0.933	0.737	0.843	0.957
ENSMUSG00000007833	0.951	0.5	0.497	0.685	0.891	0.953	1.156
ENSMUSG00000007836	46.992	40.871	38.023	39.956	39.609	50.034	35.86
ENSMUSG00000007837	1.417	1.282	0.844	0.989	1.266	1.414	1.124
ENSMUSG00000007850	36.944	43.569	42.577	33.234	37.159	35.633	37.607
ENSMUSG00000007867	0.81	0.843	0.799	0.83	0.866	0.72	0.944
ENSMUSG00000007872	1.414	2.025	2.413	4.252	2.064	6.657	7.202
ENSMUSG00000007877	0	0	0.084	0.394	0.083	0.107	0
ENSMUSG00000007880	3.102	3.315	3.085	2.676	3.098	3.225	2.411
ENSMUSG00000007888	0.008	0.021	0.026	0.082	0.035	0.056	0.021
ENSMUSG00000007891	11.101	11.735	12.619	14.3	10.512	11.678	10.391
ENSMUSG00000007892	185.016	160.967	207.383	214.378	168.202	169.573	195.075
ENSMUSG00000007908	0.086	0.049	0.077	0.128	0.069	0.077	0.074
ENSMUSG00000007944	1.408	0.881	1.588	1.137	1.109	1.211	0.856
ENSMUSG00000007946	0.02	0.035	0.13	0.034	0.065	0.028	0.051
ENSMUSG00000007950	0.893	0.468	0.604	0.69	0.793	1.282	0.909
ENSMUSG00000007987	5.459	6.067	6.495	6.39	6.515	5.29	7.255
ENSMUSG00000007989	0.322	0.334	0.263	0.261	0.356	0.29	0.272
ENSMUSG00000008028	0.107	0.081	0.07	0.18	0.17	0.152	0.07
ENSMUSG00000008035	4.114	4.059	4.312	2.566	3.762	4.651	3.429
ENSMUSG00000008036	4.003	3.218	3.451	5.941	4.482	5.67	5.147
ENSMUSG00000008090	0.071	0.064	0.138	0.031	0.013	0.042	0
ENSMUSG00000008129	0.193	0.189	0.152	0.531	0.24	0.139	0.34
ENSMUSG00000008136	0.131	0.152	0.118	0.057	0.096	0.139	0.128
ENSMUSG00000008140	2.578	1.587	1.667	1.206	2.366	2.484	2.707
ENSMUSG00000008153	4.353	3.579	3.342	4.315	5.404	5.512	3.982
ENSMUSG00000008167	4.785	3.716	4.137	5.284	4.816	5.463	5.081
ENSMUSG00000008200	3.245	4.571	4.045	4.048	2.843	2.437	3.935
ENSMUSG00000008206	1.482	1.618	1.199	1.913	1.587	1.359	1.724
ENSMUSG00000008226	0.325	0.332	0.356	0.178	0.173	0.334	0.358
ENSMUSG00000008301	8.687	9.301	8.4	8.804	8.765	8.449	10.521
ENSMUSG00000008305	0.26	0.268	0.307	0.406	0.28	0.372	0.423
ENSMUSG00000008307	0.074	0.073	0.127	0.082	0.156	0.115	0.053
ENSMUSG00000008318	0.059	0.04	0.087	0.153	0.043	0.09	0.218
ENSMUSG00000008333	17.487	17.86	19.935	18.435	17.364	14.408	20.254
ENSMUSG00000008348	91.331	79.9	88.018	84.019	97.566	113.873	73.782
ENSMUSG00000008373	15.357	14.008	16.262	12.672	13.853	12.758	15.015
ENSMUSG00000008384	0.811	0.751	0.617	0.749	0.558	0.825	0.398
ENSMUSG00000008393	12.186	13.623	8.75	8.504	12.204	9.747	9.724
ENSMUSG00000008398	0.011	0.06	0.082	0.031	0.03	0.038	0.05
ENSMUSG00000008429	0.674	0.847	0.764	0.815	0.941	0.692	0.781
ENSMUSG00000008435	13.662	16.277	13.243	15.685	13.669	12.21	13.631
ENSMUSG00000008438	0.166	0.071	0.106	0.288	0.298	0.482	0.548
ENSMUSG00000008450	5.744	5.413	5.691	4.978	5.316	5.626	4.856
ENSMUSG00000008475	59.201	63.358	58.358	56.693	61.249	51.246	67.526
ENSMUSG00000008482	0	0	0	0	0.086	0	0.407
ENSMUSG00000008489	2.472	2.335	2.565	2.817	3.137	2.88	2.626
ENSMUSG00000008496	0.036	0.026	0.016	0.06	0.038	0.049	0.019
ENSMUSG00000008540	0.294	0.537	0.581	0.256	0.116	0.097	0.344
ENSMUSG00000008575	6.526	5.844	5.991	5.967	6.105	6.476	4.656
ENSMUSG00000008590	0	0.01	0.006	0	0.029	0.004	0.008
ENSMUSG00000008601	0.014	0.086	0.015	0.024	0	0.019	0
ENSMUSG00000008604	2.588	2.092	2.604	2.283	2.519	2.296	3.169
ENSMUSG00000008658	0.422	0.348	0.4	0.268	0.349	0.426	0.264
ENSMUSG00000008668	99.023	101.321	117.307	115.005	85.64	66.754	108.141
ENSMUSG00000008682	122.272	119.715	133.138	139.296	120.56	104.533	126.502
ENSMUSG00000008683	15.152	14.86	18.887	19.933	13.457	12.349	17.969
ENSMUSG00000008690	7.813	7.021	7.861	5.981	6.943	7.787	7.011
ENSMUSG00000008730	0.532	0.629	0.639	0.502	0.511	0.583	0.519
ENSMUSG00000008734	0.097	0.094	0.107	0.311	0.271	0.417	0.176
ENSMUSG00000008763	0.132	0.116	0.174	0.124	0.097	0.148	0.136
ENSMUSG00000008789	0.002	0.002	0	0.009	0	0.008	0.009
ENSMUSG00000008822	1.732	1.638	1.96	1.506	1.405	1.09	1.859
ENSMUSG00000008845	0.007	0.015	0.004	0.046	0.048	0.014	0.026
ENSMUSG00000008855	0.348	0.395	0.449	0.512	0.351	0.544	0.417
ENSMUSG00000008859	0.394	0.338	0.44	0.417	0.394	0.332	0.422
ENSMUSG00000008874	0	0.01	0	0.039	0.012	0.126	0.029
ENSMUSG00000008892	13.588	13.731	13.413	13.534	12.55	12.332	12.456
ENSMUSG00000008932	0.002	0.003	0.008	0.053	0.032	0.03	0.015
ENSMUSG00000008958	12.782	11.047	13.451	13.793	14.325	14.284	15.454
ENSMUSG00000008976	0.993	0.932	0.878	0.899	1.028	0.953	1.237
ENSMUSG00000008999	0.013	0.003	0.02	0.035	0.008	0.083	0.025
ENSMUSG00000009013	93.137	78.423	94.198	96.629	83.922	81.358	93.336
ENSMUSG00000009030	13.616	13.191	15.093	13.384	12.737	10.983	12.077
ENSMUSG00000009035	0.245	0.127	0.168	0.218	0.348	0.287	0.223
ENSMUSG00000009070	0.002	0	0	0.006	0	0.005	0
ENSMUSG00000009073	0.742	0.534	0.464	0.581	0.647	0.924	0.945
ENSMUSG00000009075	0.044	0.024	0.029	0.121	0.01	0.012	0
ENSMUSG00000009076	0.704	0.59	0.739	0.782	0.698	0.585	0.801
ENSMUSG00000009079	6.981	5.664	7.216	7.912	7.456	8.284	8.508
ENSMUSG00000009090	3.028	2.946	2.772	2.764	3.077	3.223	3.059
ENSMUSG00000009092	0.509	0.427	0.526	0.767	0.486	0.625	0
ENSMUSG00000009093	0.102	0.01	0.025	0.118	0.063	0.096	0.357
ENSMUSG00000009097	0.016	0.044	0.018	0.114	0.036	0.116	0.172
ENSMUSG00000009108	0.04	0	0.055	0.069	0.011	0	0.105
ENSMUSG00000009112	0.643	0.501	0.678	0.62	0.531	0.663	0.706
ENSMUSG00000009114	0.029	0.026	0.024	0.175	0.04	0.213	0.038
ENSMUSG00000009115	0.022	0.029	0.084	0.17	0.156	0.17	0.171
ENSMUSG00000009145	0.1	0.123	0.111	0.174	0.181	0.077	0.262
ENSMUSG00000009185	0	0.048	0	0	0	0.303	0.14
ENSMUSG00000009207	1.459	1.652	1.131	1.299	1.598	1.647	1.52
ENSMUSG00000009214	0.008	0.007	0.009	0	0.009	0	0.043
ENSMUSG00000009216	0.016	0	0.006	0.023	0.006	0.034	0
ENSMUSG00000009246	0.003	0.012	0.015	0.029	0.015	0.005	0.027
ENSMUSG00000009248	0	0.032	0	0	0	0.151	0
ENSMUSG00000009281	0	0	0.155	0.049	0	0.04	0
ENSMUSG00000009291	7.608	7.101	6.736	6.64	7.334	6.889	7.077
ENSMUSG00000009292	0.051	0.028	0.056	0.279	0.133	0.255	0.169
ENSMUSG00000009293	5.719	5.217	5.996	6.173	6.05	5.436	5.428
ENSMUSG00000009350	0.008	0.014	0	0.028	0	0	0.042
ENSMUSG00000009356	0	0	0.004	0.055	0.026	0.061	0.031
ENSMUSG00000009376	0.022	0.032	0.039	0.084	0.072	0.102	0.074
ENSMUSG00000009378	0.002	0.001	0	0.004	0.007	0.003	0.003
ENSMUSG00000009394	0.047	0.031	0.029	0.037	0.052	0.029	0.063
ENSMUSG00000009406	0.857	0.689	0.633	0.793	0.68	1.157	0.879
ENSMUSG00000009418	1.621	1.543	1.413	1.525	1.626	1.652	1.262
ENSMUSG00000009470	0.71	0.8	0.695	0.701	0.71	0.788	0.776
ENSMUSG00000009471	0	0	0.037	0	0.145	0.047	0
ENSMUSG00000009487	0.005	0.003	0.008	0.049	0.035	0.038	0.019
ENSMUSG00000009535	7.263	6.516	6.562	6.742	7.209	6.65	6.252
ENSMUSG00000009545	0.001	0.002	0.001	0.004	0.001	0.006	0.004
ENSMUSG00000009549	63.443	58.983	65.127	71.337	50.443	45.927	64.937
ENSMUSG00000009551	0.36	0.295	0.228	0.322	0.43	0.335	0.511
ENSMUSG00000009555	1.373	1.69	1.966	1.934	1.748	1.911	2.199
ENSMUSG00000009563	9.265	9.311	7.612	6.947	9.263	9.147	11.948
ENSMUSG00000009566	0.26	0.345	0.426	0.446	0.269	0.443	0.42
ENSMUSG00000009569	0.201	0.238	0.202	0.274	0.236	0.189	0.177
ENSMUSG00000009575	7.455	7.504	7.779	7.44	7.116	6.542	6.504
ENSMUSG00000009580	0.019	0.025	0.052	0.131	0.042	0.12	0.123
ENSMUSG00000009585	0.189	0.332	0.449	0.742	0.514	0.771	0.894
ENSMUSG00000009588	0.049	0.022	0.073	0.2	0.045	0.175	0.065
ENSMUSG00000009596	0.047	0.071	0.029	0.11	0.087	0.179	0.124
ENSMUSG00000009614	0.007	0.003	0.008	0.045	0.011	0.037	0.026
ENSMUSG00000009621	0.134	0.123	0.185	0.272	0.185	0.175	0.222
ENSMUSG00000009628	0.014	0.009	0.012	0.065	0.048	0.039	0.043
ENSMUSG00000009630	0.817	0.914	0.696	0.863	0.773	1.139	1.198
ENSMUSG00000009633	0.327	0.587	1.448	0	0	0.694	0
ENSMUSG00000009640	8.274	7.277	7.188	7.034	6.739	7.92	8.212
ENSMUSG00000009646	0.009	0.017	0.026	0.221	0.104	0.087	0.062
ENSMUSG00000009647	0.236	0.292	0.179	0.285	0.174	0.172	0.198
ENSMUSG00000009654	0	0	0.02	0.048	0.005	0.019	0.072
ENSMUSG00000009670	0.002	0.003	0	0.007	0.007	0.013	0.005
ENSMUSG00000009681	0.367	0.319	0.412	0.317	0.446	0.417	0.353
ENSMUSG00000009687	0.053	0.071	0.01	0.123	0.136	0.238	0.208
ENSMUSG00000009731	0.453	0.131	0.173	0.3	0.161	0.229	0.339
ENSMUSG00000009733	0.607	0.592	0.616	0.634	0.659	0.611	0.739
ENSMUSG00000009734	0.011	0.007	0.012	0.052	0.049	0.049	0.049
ENSMUSG00000009739	2.991	3.163	3.681	2.998	2.988	3.136	2.903
ENSMUSG00000009741	0.681	1.192	0.888	0.875	0.789	0.666	0.791
ENSMUSG00000009772	0.417	0.121	0.143	0.864	0.372	0.619	0.481
ENSMUSG00000009828	0.496	0.452	0.325	0.341	0.524	0.575	0.542
ENSMUSG00000009863	24.1	24.887	25.681	24.5	23.851	21.31	23.467
ENSMUSG00000009876	0.064	0.078	0.053	0.235	0.193	0.202	0.166
ENSMUSG00000009894	13.499	11.287	11.941	12.137	11.165	13.779	11.275
ENSMUSG00000009900	0.004	0.005	0.016	0.053	0.049	0.034	0.026
ENSMUSG00000009905	1.404	1.393	1.368	1.524	1.443	1.288	1.288
ENSMUSG00000009907	2.203	1.822	2.136	2.154	2.009	2.26	1.992
ENSMUSG00000009927	110.681	114.516	125.586	109.934	85.838	69.211	124.396
ENSMUSG00000009941	0.026	0.038	0.005	0.015	0.052	0.048	0.1
ENSMUSG00000009995	4.116	3.706	4.466	4.425	3.417	3.53	4.112
ENSMUSG00000010021	0.01	0.012	0.053	0.065	0.019	0.024	0.071
ENSMUSG00000010025	0.895	1.054	0.814	0.759	0.855	0.971	1.087
ENSMUSG00000010044	0.408	0.116	0.048	1.119	0.497	0.942	0.562
ENSMUSG00000010045	7.701	7.506	9.258	7.266	9.313	9.46	9.459
ENSMUSG00000010047	21.776	22.377	21.155	20.668	22.761	17.469	21.821
ENSMUSG00000010048	1.517	1.255	1.331	1.411	1.54	0.936	2.478
ENSMUSG00000010051	0.704	1.523	0.959	2.603	1.253	1.661	1.7
ENSMUSG00000010054	2.567	2.007	3.145	2.783	2.53	3.336	1.265
ENSMUSG00000010057	38.281	41.037	38.477	39.66	31.426	30.166	42.254
ENSMUSG00000010064	0.228	0.418	0.258	0.064	0.181	0.246	0.275
ENSMUSG00000010066	0.001	0.002	0.002	0.008	0.004	0.005	0.003
ENSMUSG00000010067	3.415	3.378	2.802	2.283	3.018	3.058	4.049
ENSMUSG00000010080	0.025	0.015	0.046	0.087	0.037	0.035	0
ENSMUSG00000010086	0.591	0.409	0.235	0.422	0.468	0.537	0.278
ENSMUSG00000010095	7.253	7.125	6.898	8.034	7.602	7.709	8.768
ENSMUSG00000010097	20.061	20.31	19.466	19.198	19.4	19.535	20.576
ENSMUSG00000010110	8.077	9.443	8.973	9.222	8.831	9.081	10.418
ENSMUSG00000010122	0.015	0.022	0.025	0.202	0.079	0.122	0.187
ENSMUSG00000010154	0.033	0.095	0.104	0.065	0.08	0.07	0.117
ENSMUSG00000010175	0.015	0.013	0.04	0.046	0.083	0.09	0.073
ENSMUSG00000010205	1.123	0.944	0.955	0.934	0.865	1.09	1.039
ENSMUSG00000010277	2.537	3.28	2.569	2.957	2.312	2.028	2.331
ENSMUSG00000010290	6.157	6.392	6.132	5.283	4.325	5.232	6.382
ENSMUSG00000010307	3.699	2.765	3.937	4.384	3.189	3.425	4.004
ENSMUSG00000010311	0.016	0.043	0.133	0.194	0.238	0.102	0.063
ENSMUSG00000010342	0.015	0.01	0.019	0.048	0.035	0.075	0.037
ENSMUSG00000010358	0.025	0.023	0.037	0.117	0.222	0.154	0.088
ENSMUSG00000010362	0.862	2.08	1.556	0.876	0.715	0.741	0.685
ENSMUSG00000010376	24.217	23.766	25.894	29.487	25.439	23.679	25.209
ENSMUSG00000010392	1.981	2.196	2.21	1.355	1.571	2.099	1.771
ENSMUSG00000010406	18.699	18.644	24.54	26.715	19.44	20.776	23.167
ENSMUSG00000010435	0.009	0.003	0	0.098	0.045	0.035	0.024
ENSMUSG00000010453	2.458	3.273	2.417	2.628	2.485	2.988	2.6
ENSMUSG00000010461	0.002	0.003	0.005	0.008	0.007	0.011	0.004
ENSMUSG00000010476	0.001	0.001	0.008	0.014	0.013	0.015	0.011
ENSMUSG00000010492	0.013	0	0.029	0.09	0.028	0.055	0.135
ENSMUSG00000010505	0.676	1.051	0.981	0.596	0.605	0.512	0.55
ENSMUSG00000010517	0.044	0.04	0.043	0.049	0.032	0.042	0.042
ENSMUSG00000010529	0	0.064	0.237	0.371	0.314	0.202	0.373
ENSMUSG00000010538	0.121	0.071	0.141	0.211	0.093	0.112	0.159
ENSMUSG00000010554	1.089	1.073	1.151	1.243	1.172	1.343	0.889
ENSMUSG00000010592	0.055	0.038	0.013	0.053	0.054	0.129	0.048
ENSMUSG00000010601	0	0	0	0.041	0.061	0.045	0.062
ENSMUSG00000010607	23.967	19.679	23.514	22.82	21.636	22.146	28.384
ENSMUSG00000010608	8.203	9.572	8.703	8.804	8.412	8.338	8.254
ENSMUSG00000010609	0.294	0.302	0.331	0.387	0.3	0.309	0.248
ENSMUSG00000010651	0.019	0.043	0.053	0.05	0.021	0.027	0.125
ENSMUSG00000010660	0.181	0.25	0.052	0.13	0.234	0.072	0.257
ENSMUSG00000010663	9.528	7.858	9.59	8.111	9.692	12.228	10.161
ENSMUSG00000010721	0.101	0.071	0.084	0.109	0.076	0.114	0.12
ENSMUSG00000010751	0.076	0.094	0.039	0.081	0.09	0.107	0
ENSMUSG00000010755	2.247	2.714	2.538	2.132	2.609	2.652	2.714
ENSMUSG00000010760	0	0.048	0	0.28	0	0.076	0
ENSMUSG00000010796	0.003	0	0.003	0.021	0.002	0.006	0.008
ENSMUSG00000010797	0.002	0	0	0.014	0.005	0.018	0.005
ENSMUSG00000010803	0.053	0.033	0.063	0.188	0.119	0.155	0.126
ENSMUSG00000010825	0.005	0.011	0.014	0.052	0.025	0.025	0.013
ENSMUSG00000010830	0.023	0.055	0.059	0	0.025	0.032	0.06
ENSMUSG00000010841	0.043	0.087	0.012	0.019	0.024	0.015	0.255
ENSMUSG00000010911	1.396	1.397	1.496	1.724	1.153	0.941	1.488
ENSMUSG00000010914	2.062	2.137	1.896	1.98	2.042	1.673	2.205
ENSMUSG00000010936	0.09	0.085	0.108	0.124	0.089	0.1	0.1
ENSMUSG00000011008	0.006	0.003	0	0.039	0.008	0.037	0.015
ENSMUSG00000011034	0.001	0.005	0.01	0.074	0.023	0.029	0.027
ENSMUSG00000011096	0.268	0.362	0.58	0.933	0.651	0.874	0.597
ENSMUSG00000011114	10.475	13.162	12.696	10.573	8.492	8.673	10.974
ENSMUSG00000011118	0.13	0	0.113	0.612	0.224	0.564	0.654
ENSMUSG00000011148	0.008	0.022	0.009	0.063	0.031	0.103	0.064
ENSMUSG00000011154	0.017	0	0.005	0.051	0.05	0.065	0.054
ENSMUSG00000011158	0.167	0.228	0.227	0.228	0.189	0.279	0.238
ENSMUSG00000011171	0.021	0.023	0.029	0.018	0.024	0.039	0.04
ENSMUSG00000011179	3.709	3.063	4.542	2.965	2.941	2.95	2.59
ENSMUSG00000011254	4.717	5.786	5.679	4.405	5.54	4.436	4.856
ENSMUSG00000011256	0.263	0.162	0.229	0.309	0.252	0.353	0.349
ENSMUSG00000011257	0.333	0.301	0.329	0.463	0.38	0.481	0.389
ENSMUSG00000011263	0.008	0.005	0.003	0.027	0.011	0.015	0
ENSMUSG00000011267	0	0.023	0	0.178	0.056	0.472	0
ENSMUSG00000011305	0.014	0.039	0.016	0.125	0.032	0.02	0.151
ENSMUSG00000011306	3.556	3.369	3.473	3.49	3.857	3.783	4.054
ENSMUSG00000011349	0.023	0	0	0.02	0.038	0.08	0
ENSMUSG00000011350	0.004	0	0.004	0	0.018	0.017	0.042
ENSMUSG00000011382	0.549	0.387	0.64	0.433	0.4	0.634	0.504
ENSMUSG00000011427	6.71	6.229	5.488	7.697	6.693	7.797	5.446
ENSMUSG00000011589	20.767	20.646	19.668	23.783	21.688	22.285	21.869
ENSMUSG00000011632	0.039	0.017	0	0.404	0.107	0.11	0.101
ENSMUSG00000011658	0.211	0.189	0.481	0.664	0.45	0.373	1.103
ENSMUSG00000011751	0.011	0.014	0.018	0.066	0.039	0.056	0.049
ENSMUSG00000011752	3.264	3.217	3.658	3.688	3.374	3.256	2.66
ENSMUSG00000011831	0.131	0.135	0.176	0.119	0.156	0.158	0.156
ENSMUSG00000011832	0.803	0.44	0.601	0.537	0.766	1.061	1.072
ENSMUSG00000011837	12.448	10.093	9.74	12.613	14.174	13.7	16.042
ENSMUSG00000011877	1.45	1.46	1.908	1.825	1.203	1.985	1.572
ENSMUSG00000011884	0.204	0.179	0.128	0.153	0.128	0.034	0.063
ENSMUSG00000011958	2.591	2.659	2.307	2.427	1.841	2.301	2.9
ENSMUSG00000011960	4.307	4.57	4.184	4.593	4.526	4.845	3.952
ENSMUSG00000012017	0.039	0.028	0.035	0.191	0.043	0.022	0.082
ENSMUSG00000012042	0.006	0.005	0.013	0.02	0.013	0.004	0.023
ENSMUSG00000012076	1.523	1.377	1.564	1.825	1.223	1.6	1.469
ENSMUSG00000012114	0.562	0.564	0.736	0.854	0.845	0.995	0.876
ENSMUSG00000012117	1.924	1.732	2.137	1.966	2.257	2.41	2.012
ENSMUSG00000012123	0.026	0.041	0.014	0.265	0.086	0.184	0.161
ENSMUSG00000012126	0.231	0.136	0.233	0.426	0.22	0.19	0.289
ENSMUSG00000012211	0	0	0.007	0.021	0.026	0.025	0.031
ENSMUSG00000012282	0	0	0	0.68	0.144	0.226	0.038
ENSMUSG00000012296	0.637	0.452	0.623	0.328	0.555	0.617	0.709
ENSMUSG00000012350	0.015	0.01	0.022	0.064	0.062	0.101	0.034
ENSMUSG00000012396	0.072	0.065	0.094	0.084	0.106	0.017	0.253
ENSMUSG00000012405	110.173	103.134	110.816	108.434	94.697	83.711	110.976
ENSMUSG00000012422	2.849	2.539	2.756	3.042	2.227	2.423	2.552
ENSMUSG00000012428	0	0.018	0.013	0.007	0	0.028	0
ENSMUSG00000012429	0.841	1.406	1.139	1.178	0.67	0.761	1.346
ENSMUSG00000012443	0.702	1.398	0.896	0.248	0.249	0.183	0.258
ENSMUSG00000012483	16.153	15.536	17.922	18.074	9.548	7.551	15.84
ENSMUSG00000012519	0	0.018	0.018	0.148	0.097	0.083	0.12
ENSMUSG00000012520	0.018	0.079	0.097	0.214	0.175	0.249	0.599
ENSMUSG00000012535	3.927	3.815	3.811	3.565	3.913	4.385	3.771
ENSMUSG00000012609	0.143	0.136	0.186	0.264	0.241	0.309	0.267
ENSMUSG00000012640	2.831	2.597	2.493	3.018	2.965	2.144	2.497
ENSMUSG00000012705	0.08	0	0.066	0.035	0	0.113	0
ENSMUSG00000012777	0.082	0.015	0.037	1.463	0.673	0.935	0.605
ENSMUSG00000012819	0.002	0.002	0.003	0.016	0.006	0.015	0.007
ENSMUSG00000012848	170.325	172.229	177.843	185.234	151.125	136.971	173.004
ENSMUSG00000012889	0.013	0.012	0.015	0.482	0.16	0.523	0.069
ENSMUSG00000013033	10.065	8.938	8.509	8.306	10.242	11.006	7.745
ENSMUSG00000013076	0.663	0.851	0.742	0.722	0.639	0.525	0.516
ENSMUSG00000013083	0	0	0.059	0.466	0.059	0.304	0
ENSMUSG00000013089	0.146	0.187	0.205	0.074	0.06	0.144	0.062
ENSMUSG00000013091	0	0.055	0.068	0.427	0.068	0.522	0
ENSMUSG00000013150	2.351	1.804	2.129	2.193	2.598	2.635	2.465
ENSMUSG00000013155	0.464	0.96	1.117	1.438	0.867	1.543	0.792
ENSMUSG00000013158	0	0.159	0	0	0.097	0.125	0
ENSMUSG00000013160	2.949	2.307	2.452	2.854	3.284	3.154	3.053
ENSMUSG00000013236	7.387	6.719	7.24	9.298	7.89	7.248	9.01
ENSMUSG00000013275	0.597	0.605	0.555	0.505	0.814	0.743	0.602
ENSMUSG00000013338	0.003	0.009	0.006	0.115	0.042	0.065	0.053
ENSMUSG00000013353	0.031	0.028	0.069	0.248	0.185	0.141	0.179
ENSMUSG00000013367	0.095	0.077	0.106	0.07	0.116	0.05	0.105
ENSMUSG00000013415	3.481	3.503	3.049	2.66	3.338	3.049	2.857
ENSMUSG00000013418	0.016	0.005	0.01	0.064	0.033	0.037	0.042
ENSMUSG00000013419	1.039	1.052	1.2	1.64	1.226	1.513	1.331
ENSMUSG00000013465	4.315	4.402	4.894	5.223	5.337	5.292	5.543
ENSMUSG00000013483	0.007	0	0.01	0.084	0.058	0.042	0.036
ENSMUSG00000013495	1.838	1.402	1.453	2.075	1.23	1.466	1.461
ENSMUSG00000013523	0.004	0.011	0.014	0.215	0.129	0.06	0.098
ENSMUSG00000013539	1.816	2.216	2.074	2.51	2.396	2.083	2.919
ENSMUSG00000013562	0.174	0.078	0.048	1.132	0.431	0.984	0.341
ENSMUSG00000013584	0.002	0.002	0.005	0.011	0.013	0.018	0.014
ENSMUSG00000013593	9.852	7.938	10.358	9.662	8.529	10.532	10.601
ENSMUSG00000013611	0.002	0.014	0.002	0.029	0.024	0.036	0.039
ENSMUSG00000013622	11.32	9.736	10.131	11.481	10.593	9.74	13.708
ENSMUSG00000013629	1.089	0.987	1.101	0.684	0.939	1.217	0.905
ENSMUSG00000013643	0.037	0.02	0.033	0.167	0.22	0.282	0.174
ENSMUSG00000013646	1.132	0.825	1.113	1.562	1.409	1.524	2.086
ENSMUSG00000013653	0.018	0	0.039	0.153	0.097	0.149	0.184
ENSMUSG00000013662	5.659	5.591	5.094	5.388	5.179	5.253	4.951
ENSMUSG00000013663	1.1	1.463	1.399	1.311	1.397	1.18	1.115
ENSMUSG00000013668	0	0	0.044	0.035	0.044	0.071	0
ENSMUSG00000013698	46.634	65.244	65.98	33.484	36.515	36.047	35.487
ENSMUSG00000013701	1.302	1.33	1.495	1.491	1.588	1.434	1.455
ENSMUSG00000013707	0.182	0.246	0.202	0.423	0.167	0.043	0.239
ENSMUSG00000013736	6.06	7.491	6.334	5.246	5.334	4.429	6.817
ENSMUSG00000013766	14.516	20.288	30.2	19.797	23.399	17.477	24.108
ENSMUSG00000013787	1.678	1.611	2.012	2.619	2.063	2.031	2.319
ENSMUSG00000013822	19.48	21.891	22.842	22.111	18.498	14.134	22.756
ENSMUSG00000013833	0.528	0.294	0.356	0.813	0.743	0.739	0.508
ENSMUSG00000013846	0.621	0.188	0.275	0.756	0.419	0.583	0.528
ENSMUSG00000013858	0.129	0.132	0.173	0.256	0.253	0.221	0.313
ENSMUSG00000013878	0.461	0.462	0.351	0.557	0.621	0.633	0.498
ENSMUSG00000013921	24.377	22.321	27.33	21.972	27.651	34.748	23.159
ENSMUSG00000013928	0	0.008	0.019	0	0.009	0.012	0
ENSMUSG00000013936	0.034	0.031	0.031	0.228	0.243	0.254	0.343
ENSMUSG00000013973	0.628	0.564	0.645	0.796	0.671	0.982	0.719
ENSMUSG00000013997	5.49	5.823	4.843	4.655	5.03	4.704	5.826
ENSMUSG00000014030	0	0.001	0.001	0.006	0.003	0.003	0.001
ENSMUSG00000014039	0.813	1.056	0.877	1.029	0.872	0.996	1.163
ENSMUSG00000014074	0.284	0.22	0.359	0.751	0.599	0.81	0.725
ENSMUSG00000014075	1.79	1.633	1.953	2.443	1.589	1.431	1.731
ENSMUSG00000014077	3.701	3.607	3.728	3.2	3.682	4.12	2.854
ENSMUSG00000014158	0.012	0.009	0	0.025	0.018	0.02	0.012
ENSMUSG00000014164	0.013	0.006	0.009	0.033	0.027	0.013	0.023
ENSMUSG00000014177	1.269	1.273	1.518	1.27	0.994	0.828	1.398
ENSMUSG00000014195	8.113	7.881	7.359	8.093	8.596	9.129	7.826
ENSMUSG00000014198	0	0.001	0	0.044	0.007	0.023	0.003
ENSMUSG00000014226	32.015	29.666	26.768	17.317	27.973	23.167	31.04
ENSMUSG00000014232	0.491	0.704	0.538	0.737	0.57	0.582	0.705
ENSMUSG00000014243	0.091	0.071	0.196	0.17	0.128	0.104	0.176
ENSMUSG00000014245	0.059	0.061	0.068	0.062	0.031	0.083	0.089
ENSMUSG00000014294	54.444	56.905	68.599	64.659	52.186	46.796	62.433
ENSMUSG00000014301	3.705	2.836	3.902	4.435	3.135	2.71	4.399
ENSMUSG00000014303	0.274	0.287	0.395	0.362	0.227	0.429	0.643
ENSMUSG00000014313	14.799	14.306	17.135	18.4	13.695	11.667	16.996
ENSMUSG00000014329	0.005	0.003	0.01	0.041	0.02	0.044	0.033
ENSMUSG00000014349	0.663	0.526	0.671	0.769	0.545	0.858	0.931
ENSMUSG00000014351	0.014	0	0.046	0	0.015	0.039	0
ENSMUSG00000014353	1.012	1.078	0.984	1.291	1.181	1.025	1.669
ENSMUSG00000014355	1.644	1.567	1.609	1.227	1.328	1.52	1.283
ENSMUSG00000014361	0.023	0.014	0.026	0.097	0.071	0.069	0.089
ENSMUSG00000014402	11.818	9.505	9.379	8.705	9.868	10.968	11.33
ENSMUSG00000014418	0.817	1.121	1.039	0.818	0.825	0.851	1.06
ENSMUSG00000014426	0.033	0.042	0.039	0.041	0.037	0.046	0.06
ENSMUSG00000014444	0.004	0.01	0.014	0.052	0.018	0.067	0.013
ENSMUSG00000014453	0.01	0.003	0.015	0.037	0.011	0.055	0.041
ENSMUSG00000014470	1.035	1.485	0.906	1.225	0.604	0.665	0.706
ENSMUSG00000014496	0.077	0.101	0.101	0.179	0.153	0.099	0.187
ENSMUSG00000014498	0.15	0.147	0.139	0.147	0.081	0.201	0.215
ENSMUSG00000014503	0.062	0.044	0.092	0.112	0.063	0.157	0.088
ENSMUSG00000014504	18.045	20.234	22.581	19.352	18.93	16.445	22.148
ENSMUSG00000014529	0.006	0.003	0.007	0.01	0.029	0.017	0.008
ENSMUSG00000014542	0	0.02	0.016	0.013	0.073	0.052	0.058
ENSMUSG00000014543	0.002	0.002	0.004	0.003	0.004	0.005	0
ENSMUSG00000014547	0.024	0.022	0.018	0.026	0.026	0.042	0.03
ENSMUSG00000014550	3.447	3.801	3.618	2.946	3.607	3.989	2.97
ENSMUSG00000014551	3.229	3.199	3.683	2.999	2.753	2.367	3.285
ENSMUSG00000014554	1.09	0.95	0.904	1.2	1.141	1.151	1.199
ENSMUSG00000014592	0.137	0.153	0.129	0.155	0.166	0.156	0.124
ENSMUSG00000014599	0.164	0.184	0.182	0.216	0.191	0.245	0.233
ENSMUSG00000014601	1.625	1.711	2.15	1.668	1.866	1.696	2.063
ENSMUSG00000014602	2.978	2.312	2.409	2.739	3.201	3.278	2.463
ENSMUSG00000014606	28.804	25.467	28.995	24.767	31.834	31.232	34.401
ENSMUSG00000014609	0.08	0.054	0	0.104	0.066	0.028	0.209
ENSMUSG00000014633	0.271	0.364	0.324	0.348	0.302	0.269	0.227
ENSMUSG00000014668	2.804	2.445	2.603	3.235	2.766	3.389	3.082
ENSMUSG00000014686	0.009	0.008	0	0.033	0	0.066	0
ENSMUSG00000014704	0	0.032	0.198	0.311	0.197	0.051	0.374
ENSMUSG00000014725	0.043	0.031	0.052	0.126	0.105	0.24	0.136
ENSMUSG00000014747	0.015	0.109	0.135	0.079	0.05	0.086	0
ENSMUSG00000014748	10.187	10.144	7.877	10.545	10.158	10.584	10.27
ENSMUSG00000014763	4.964	4.651	5.156	4.705	4.689	4.619	4.834
ENSMUSG00000014767	3.531	4.403	3.482	3.712	3.164	3.028	3.425
ENSMUSG00000014769	19.288	19.616	19.445	19.228	17.16	14.727	19.518
ENSMUSG00000014773	1.976	1.465	1.366	2.664	2.798	3.788	3.702
ENSMUSG00000014776	0.063	0.056	0.122	0.027	0.087	0.245	0
ENSMUSG00000014778	0.037	0.008	0.02	0.016	0.02	0.013	0.036
ENSMUSG00000014782	0.144	0.121	0.11	0.845	0.426	0.816	0.542
ENSMUSG00000014786	0.204	0.348	0.38	0.513	0.246	0.554	0.564
ENSMUSG00000014791	0.344	0.231	0.324	0.956	1.041	0.365	0.63
ENSMUSG00000014813	0.997	1.465	0.86	1.127	1.186	1.513	1.455
ENSMUSG00000014837	16.181	15.135	12.914	16.305	15.039	19.341	13.972
ENSMUSG00000014846	0.128	0.48	0.166	0.372	0.354	0.606	0.448
ENSMUSG00000014850	0.283	0.247	0.2	0.238	0.218	0.355	0.385
ENSMUSG00000014852	0.014	0	0	0.025	0.032	0.054	0.019
ENSMUSG00000014856	8.127	7.578	8.291	9.883	7.284	5.804	9.198
ENSMUSG00000014859	1.12	1.991	1.377	1.538	1.012	1.253	1.026
ENSMUSG00000014867	9.288	8.073	8.162	7.259	10.388	10.084	8.913
ENSMUSG00000014873	13.069	17.889	14.677	13.917	14.454	17.614	14.68
ENSMUSG00000014905	5.585	5.666	6.21	5.791	4.834	5.362	7.961
ENSMUSG00000014907	0.02	0.036	0.031	0.049	0.063	0.032	0.045
ENSMUSG00000014932	0.069	0.055	0.062	0.051	0.061	0.052	0.048
ENSMUSG00000014956	3.97	4.356	4.786	3.69	3.811	3.729	3.62
ENSMUSG00000014959	0.674	0.498	0.427	0.438	0.525	0.627	0.668
ENSMUSG00000014980	0.514	0.631	0.815	0.414	0.459	0.192	0.453
ENSMUSG00000015001	0.021	0.019	0.018	0.087	0.081	0.074	0.093
ENSMUSG00000015002	0.254	0.15	0.153	0.149	0.16	0.231	0.247
ENSMUSG00000015013	15.788	14.12	15.8	15.638	13.897	11.783	19.726
ENSMUSG00000015016	0.299	0.188	0.248	0.276	0.177	0.17	0.245
ENSMUSG00000015023	0.726	0.714	0.746	0.809	0.701	0.815	0.971
ENSMUSG00000015027	0.065	0.028	0.04	0.113	0.051	0.077	0.068
ENSMUSG00000015053	0.046	0.012	0.007	0.365	0.152	0.418	0.103
ENSMUSG00000015083	1.969	2.273	2.648	1.858	2.418	1.753	3.019
ENSMUSG00000015085	0.016	0.1	0.018	0	0.035	0.09	0
ENSMUSG00000015087	0.579	0.708	0.667	1.159	1.182	0.877	0.806
ENSMUSG00000015090	0.853	0.743	1.317	0.225	0.142	0.037	0.135
ENSMUSG00000015092	23.816	15.058	15.301	13	19.738	23.143	27.415
ENSMUSG00000015093	0.223	0.2	0.099	1.006	0.638	0.441	0.233
ENSMUSG00000015094	26.072	12.07	5.503	7.055	13.313	18.784	23.427
ENSMUSG00000015095	56.089	51.669	56.644	48.554	52.192	55.811	50.907
ENSMUSG00000015112	0.024	0.047	0.067	0.024	0.015	0.028	0.033
ENSMUSG00000015120	12.977	15.569	12.968	12.126	12.454	11.369	13.173
ENSMUSG00000015126	17.368	16.453	10.983	13.301	17.912	16.229	21.917
ENSMUSG00000015127	0.131	0.187	0.125	0.365	0.225	0.289	0.329
ENSMUSG00000015133	0.016	0.008	0.024	0.082	0.041	0.061	0.049
ENSMUSG00000015134	0.009	0.006	0.005	0.029	0.047	0.02	0.031
ENSMUSG00000015143	0.203	0.296	0.313	0.302	0.23	0.191	0.229
ENSMUSG00000015149	7.449	6.626	6.957	8.84	8.284	7.586	8.272
ENSMUSG00000015165	32.356	44.651	43.042	28.265	32.482	28.582	38.099
ENSMUSG00000015176	18.926	18.015	16.682	16.717	17.898	17.576	13.742
ENSMUSG00000015189	1.132	0.851	0.863	0.988	0.935	1.227	1.025
ENSMUSG00000015202	0.003	0.002	0.007	0.011	0.013	0.008	0.002
ENSMUSG00000015214	0.154	0.175	0.283	0.171	0.178	0.24	0.245
ENSMUSG00000015217	32.206	44.606	41.62	27.304	28.481	29.461	31.427
ENSMUSG00000015222	5.592	4.639	5.051	5.363	5.404	5.31	4.814
ENSMUSG00000015224	0.134	0.228	0.33	0.629	0.234	0.259	0.459
ENSMUSG00000015242	0.036	0.033	0.072	0.202	0.152	0.298	0.532
ENSMUSG00000015243	0.027	0.037	0.036	0.05	0.046	0.057	0.045
ENSMUSG00000015247	15.086	13.823	13.031	17.522	14.676	12.617	14.711
ENSMUSG00000015289	17.868	19.719	19.466	22.611	14.171	15.028	19.289
ENSMUSG00000015290	16.163	18.896	18.236	15.462	19.045	14.535	17.769
ENSMUSG00000015291	283.229	302.755	264.166	280.538	291.04	281.79	267.669
ENSMUSG00000015305	0.005	0.011	0.008	0.041	0.027	0.04	0.032
ENSMUSG00000015312	0.449	0.44	0.814	1.278	1.305	1.619	0.214
ENSMUSG00000015314	0	0.002	0.005	0.021	0	0.014	0.032
ENSMUSG00000015316	0.018	0.018	0.017	0.075	0.064	0.079	0.04
ENSMUSG00000015335	5.169	2.894	3.888	4.771	4.009	4.52	4.678
ENSMUSG00000015337	0.067	0.03	0.074	0.058	0.185	0	0
ENSMUSG00000015340	0.007	0.03	0.086	0.114	0.067	0.151	0.142
ENSMUSG00000015341	8.183	8.113	7.958	7.997	8.717	8.193	8.118
ENSMUSG00000015342	0.072	0.054	0.085	0.063	0.082	0.094	0.084
ENSMUSG00000015354	0.03	0.027	0.024	0.114	0.068	0.172	0.082
ENSMUSG00000015355	0.022	0.02	0.016	0.026	0.008	0.032	0.019
ENSMUSG00000015357	1.387	1.501	1.578	1.554	1.479	1.417	2.172
ENSMUSG00000015363	0.982	0.817	0.824	0.778	0.748	0.757	1.512
ENSMUSG00000015365	0.01	0.008	0.025	0.037	0.021	0.051	0.041
ENSMUSG00000015377	1.555	1.679	1.441	2.588	1.534	1.997	2.218
ENSMUSG00000015396	0.086	0.46	0.207	0.375	0.158	0.102	0.313
ENSMUSG00000015401	0.003	0.013	0.016	0.01	0.038	0.061	0
ENSMUSG00000015405	0.014	0.013	0.006	0.034	0.021	0.077	0.041
ENSMUSG00000015437	0.507	0.114	0.168	1.058	1.006	1.257	0.332
ENSMUSG00000015443	0.029	0.026	0.011	0.085	0.032	0.097	0.026
ENSMUSG00000015451	0.06	0.065	0.053	0.125	0.132	0.111	0.094
ENSMUSG00000015452	0.365	0.328	0.28	0.342	0.247	0.398	0.735
ENSMUSG00000015461	5.093	2.541	4.002	4.466	4.186	6.536	8.376
ENSMUSG00000015467	0.461	0.266	0.036	0.687	0.435	1.398	0.775
ENSMUSG00000015468	0.028	0.019	0.032	0.099	0.051	0.066	0.103
ENSMUSG00000015474	0.786	0.772	0.702	1.038	0.594	0.877	1.315
ENSMUSG00000015476	0.336	0.065	0.239	0.459	0.132	0.238	0.126
ENSMUSG00000015478	37.58	31.901	39.973	43.926	41.603	38.558	34.155
ENSMUSG00000015484	0.009	0.007	0.011	0.067	0.032	0.038	0.009
ENSMUSG00000015488	2.767	2.034	2.628	1.949	2.786	2.573	2.509
ENSMUSG00000015501	0.382	0.281	0.286	0.348	0.348	0.394	0.336
ENSMUSG00000015519	0.018	0	0.007	0	0.061	0.009	0.064
ENSMUSG00000015522	0.467	0.429	0.538	0.511	0.421	0.478	0.492
ENSMUSG00000015533	0.004	0.004	0.011	0.039	0.017	0.042	0.028
ENSMUSG00000015536	6.14	5.426	5.882	5.375	4.911	4.64	5.245
ENSMUSG00000015542	3.948	5.117	4.772	5.043	5.24	3.817	3.28
ENSMUSG00000015568	0.765	0.305	0.199	0.462	0.293	0.227	0.469
ENSMUSG00000015575	6.317	7.026	7.63	7.795	8.414	5.725	7.326
ENSMUSG00000015579	0.059	0.027	0.099	0.207	0.098	0.042	0.078
ENSMUSG00000015597	0.668	0.711	0.768	0.69	0.708	0.529	0.686
ENSMUSG00000015599	0.113	0.099	0.123	0.166	0.132	0.154	0.205
ENSMUSG00000015605	1.314	1.213	1.538	1.561	0.867	0.839	2.229
ENSMUSG00000015619	0.047	0.012	0.052	0.218	0.179	0.334	0.254
ENSMUSG00000015627	0.018	0.008	0.02	0	0.03	0.013	0
ENSMUSG00000015647	0.019	0.02	0.019	0.088	0.058	0.049	0.096
ENSMUSG00000015652	0.133	0.143	0.14	0.185	0.154	0.282	0.365
ENSMUSG00000015653	0.194	0.148	0.129	0.519	0.342	0.362	0.334
ENSMUSG00000015656	675.085	694.272	691.508	626.789	660.649	571.768	657.913
ENSMUSG00000015659	0.333	0.431	0.43	0.432	0.362	0.518	0.596
ENSMUSG00000015665	0	0.078	0.016	0.025	0.08	0.062	0.114
ENSMUSG00000015668	22.571	25.254	23.991	20.518	25.161	19.235	22.557
ENSMUSG00000015671	18.875	20.38	18.563	20.483	17.56	15.703	18.046
ENSMUSG00000015672	32.86	31.946	31.928	35.804	26.033	25.416	31.867
ENSMUSG00000015697	2.606	2.446	2.577	1.875	2.222	2.537	2.596
ENSMUSG00000015702	0.047	0.07	0.035	0.162	0.077	0.188	0.163
ENSMUSG00000015709	0.348	0.265	0.384	0.355	0.348	0.309	0.364
ENSMUSG00000015711	2.288	1.746	2.096	1.96	2.253	2.758	1.551
ENSMUSG00000015714	10.648	11.041	10.742	11.139	8.67	9.268	10.463
ENSMUSG00000015721	0.008	0.007	0.012	0.048	0.027	0.046	0.052
ENSMUSG00000015733	14.521	15.823	14.878	13.158	12.329	10.615	13.058
ENSMUSG00000015745	3.897	5.076	4.708	5.547	4.371	4.551	5.668
ENSMUSG00000015747	1.198	1.086	1.211	1.489	1.139	1.184	1.14
ENSMUSG00000015748	3.393	4.367	3.569	3.581	3.5	2.718	3.507
ENSMUSG00000015749	20.924	24.441	20.306	17.239	19.644	22.625	12.549
ENSMUSG00000015750	1.358	0.843	0.775	1.702	1.233	2.462	1.255
ENSMUSG00000015755	0.488	0.677	0.752	0.463	0.604	0.667	0.447
ENSMUSG00000015757	4.587	5.091	4.614	5.516	4.141	4.259	4.145
ENSMUSG00000015759	4.365	4.27	4.917	4.35	3.351	2.763	4.771
ENSMUSG00000015766	0.009	0.003	0.009	0.04	0.018	0.032	0.024
ENSMUSG00000015776	40.854	40.954	43.348	41.971	45.467	40.24	38.459
ENSMUSG00000015790	15.59	15.674	15.448	15.769	15.402	13.971	12.983
ENSMUSG00000015804	15.154	14.8	19.438	17.842	16.366	14.373	19.774
ENSMUSG00000015806	2.437	2.796	2.876	3.127	3.63	4.145	3.594
ENSMUSG00000015812	0.021	0.055	0.091	0.178	0.023	0.058	0.161
ENSMUSG00000015829	0.027	0.012	0.014	0.03	0.019	0.016	0.023
ENSMUSG00000015837	5.262	5.017	5.187	5.445	6.339	6.419	6.445
ENSMUSG00000015839	0.305	0.527	0.499	0.252	0.085	0.147	0.078
ENSMUSG00000015843	0.008	0.008	0	0.029	0.012	0.024	0.022
ENSMUSG00000015846	0.041	0.057	0.027	0.078	0.09	0.045	0.031
ENSMUSG00000015850	0.022	0.026	0.008	0.333	0.162	0.125	0.039
ENSMUSG00000015852	0.073	0.513	0.42	0.659	0.469	0.235	0.261
ENSMUSG00000015854	0	0	0.007	0.057	0.05	0.046	0.034
ENSMUSG00000015869	0.683	0.717	0.642	0.809	0.529	0.801	0.861
ENSMUSG00000015879	0.029	0.025	0.023	0.035	0.017	0.017	0.029
ENSMUSG00000015880	0.448	0.923	0.624	0.142	0.168	0.148	0.251
ENSMUSG00000015882	0.128	0.095	0.105	0.113	0.108	0.152	0.179
ENSMUSG00000015889	2.882	2.893	3.304	2.467	2.681	2.572	2.108
ENSMUSG00000015890	0.005	0.014	0.029	0.072	0.028	0.095	0.135
ENSMUSG00000015932	12.102	11.815	11.624	13.553	13.349	10.836	13.043
ENSMUSG00000015937	2.8	3.299	3.002	2.166	2.604	2.696	2.369
ENSMUSG00000015942	0.197	0.25	0.244	0.231	0.17	0.224	0.213
ENSMUSG00000015943	2.082	1.615	2.53	2.29	1.748	1.802	2.12
ENSMUSG00000015944	2.206	1.983	1.756	2.37	2.54	2.585	2.1
ENSMUSG00000015947	0	0.028	0	0.014	0.034	0.011	0.061
ENSMUSG00000015950	0.036	0.065	0.03	0.219	0.129	0.128	0.047
ENSMUSG00000015957	0.013	0.012	0.005	0.037	0.024	0.024	0.011
ENSMUSG00000015961	1.211	0.915	1.299	1.404	1.145	1.231	1.131
ENSMUSG00000015962	0	0.003	0.02	0.051	0.028	0.016	0.019
ENSMUSG00000015966	0.115	0.055	0.18	0.2	0.336	0.355	0.372
ENSMUSG00000015968	0.011	0.013	0.018	0.034	0.024	0.035	0.021
ENSMUSG00000015970	0.033	0.027	0.061	0.148	0.07	0.245	0.093
ENSMUSG00000015971	3.397	2.884	4.103	3.618	4.389	4.023	2.899
ENSMUSG00000015980	0.095	0.14	0.08	0.305	0.193	0.232	0.173
ENSMUSG00000015981	0.002	0.001	0.001	0.003	0.003	0.004	0.004
ENSMUSG00000015994	0.517	0.514	0.425	0.694	0.547	0.695	0.817
ENSMUSG00000016018	2.654	2.912	2.641	2.308	2.435	2.465	2.823
ENSMUSG00000016024	0.085	0.009	0.174	0.25	0.249	0.394	0.3
ENSMUSG00000016028	0.073	0.093	0.089	0.096	0.098	0.069	0.074
ENSMUSG00000016087	0.009	0.006	0.012	0.012	0.024	0.034	0.021
ENSMUSG00000016128	0.004	0.007	0.005	0.048	0.021	0.035	0.029
ENSMUSG00000016150	0.003	0.002	0.002	0.003	0.004	0.006	0.003
ENSMUSG00000016179	1.513	0.806	0.814	1.309	0.909	1.556	1.16
ENSMUSG00000016181	0.48	0.568	0.634	0.77	0.733	0.715	0.79
ENSMUSG00000016194	0.016	0.007	0.011	0.081	0.04	0.089	0.064
ENSMUSG00000016200	0.024	0.022	0.025	0.024	0.019	0.035	0.016
ENSMUSG00000016206	0	0	0.045	0.176	0.089	0.086	0
ENSMUSG00000016239	0.005	0.011	0.022	0.062	0.039	0.04	0.04
ENSMUSG00000016252	65.173	68.596	79.566	92.196	57.221	46.015	85.495
ENSMUSG00000016253	16.632	18.865	17.451	16.787	16.348	15.221	15.273
ENSMUSG00000016255	0	0.043	0	0.146	0	0.034	0.031
ENSMUSG00000016256	5.874	4.913	7.682	6.639	6.029	6.711	3.482
ENSMUSG00000016257	12.414	12.337	11.962	13.291	12.863	9.439	12.232
ENSMUSG00000016262	0.62	0.729	1.145	0.413	0.481	0.564	0.762
ENSMUSG00000016283	0	0	0.071	0.278	0.07	0.136	0
ENSMUSG00000016308	7.247	7.499	7.787	8.415	7.61	6.82	8.25
ENSMUSG00000016319	232.817	295.583	267.826	229.398	214.782	181.532	215.427
ENSMUSG00000016327	0.004	0.008	0.037	0.022	0.014	0.036	0.066
ENSMUSG00000016344	57.294	44.539	66.099	49.809	56.472	65.836	66.844
ENSMUSG00000016346	0.93	0.758	0.933	0.839	1.073	0.878	1.048
ENSMUSG00000016349	0.138	0.05	0.082	0.272	0.102	0.3	0.145
ENSMUSG00000016356	0.006	0.01	0.031	0.039	0.034	0.047	0.022
ENSMUSG00000016382	0.186	0.197	0.25	0.189	0.165	0.201	0.086
ENSMUSG00000016386	0.532	0.537	0.742	0.307	0.363	0.375	0.383
ENSMUSG00000016409	3.595	3.575	3.835	3.52	3.653	3.633	3.31
ENSMUSG00000016427	27.731	29.824	30.236	32.899	27.292	20.374	32.539
ENSMUSG00000016458	0.011	0.01	0.01	0.029	0.042	0.047	0.029
ENSMUSG00000016477	0.075	0.061	0.028	0.063	0.085	0.074	0.069
ENSMUSG00000016481	0.797	0.632	0.704	0.623	0.57	0.518	0.429
ENSMUSG00000016487	0.025	0.011	0.013	0.141	0.123	0.102	0.113
ENSMUSG00000016493	0.026	0.025	0.019	0.027	0.022	0.035	0.041
ENSMUSG00000016494	0.035	0.141	0.004	0.214	0.148	0.332	0.171
ENSMUSG00000016495	4.279	4.631	4.847	5.205	4.332	3.824	4.363
ENSMUSG00000016496	0.071	0.135	0.019	0.116	0.092	0.124	0
ENSMUSG00000016498	0.001	0	0.003	0.04	0.011	0.049	0.019
ENSMUSG00000016503	0.186	0.089	0.014	0.065	0.232	0.018	0.195
ENSMUSG00000016510	3.874	2.941	2.939	3.546	2.753	2.779	3.565
ENSMUSG00000016520	0.32	0.098	0.238	0.288	0.214	0.269	0.286
ENSMUSG00000016524	0	0	0.013	0.04	0.089	0.066	0.03
ENSMUSG00000016526	0.341	0.591	0.307	0.717	0.612	0.595	0.602
ENSMUSG00000016528	0.061	0.097	0.169	0.139	0.101	0.191	0.241
ENSMUSG00000016529	0.185	0.015	0.056	0.205	0.074	0.214	0.22
ENSMUSG00000016534	1.095	1.056	1.318	1.4	1.351	1.014	1.156
ENSMUSG00000016541	5.698	4.417	4.688	5.534	5.62	5.901	5.448
ENSMUSG00000016552	4.777	3.846	5.268	5.241	4.737	4.971	5.438
ENSMUSG00000016554	13.33	12.764	14.28	13.561	13.678	13.103	11.135
ENSMUSG00000016559	554.196	625.283	659.573	509.114	569.544	498.331	622.336
ENSMUSG00000016619	1.387	0.936	1.263	1.022	1.105	1.183	1.145
ENSMUSG00000016624	0.311	0.397	0.369	0.433	0.318	0.341	0.38
ENSMUSG00000016626	0.031	0.015	0.043	0.101	0.113	0.161	0.058
ENSMUSG00000016637	7.507	8.038	8.648	7.93	8.787	7.161	7.867
ENSMUSG00000016664	0.079	0.054	0.067	0.081	0.075	0.062	0.066
ENSMUSG00000016757	2.7	2.231	2.361	2.463	2.757	3.714	2.818
ENSMUSG00000016758	0.019	0.026	0	0.008	0	0	0.038
ENSMUSG00000016763	0.214	0.223	0.201	0.298	0.237	0.203	0.28
ENSMUSG00000016831	12.618	14.01	13.152	11.892	13.097	12.04	12.522
ENSMUSG00000016833	13.672	15.447	17.744	17.353	14.45	11.502	19.248
ENSMUSG00000016918	0.001	0.009	0.006	0.021	0.01	0.026	0.016
ENSMUSG00000016921	5.631	5.749	6.579	5.901	6.138	4.654	7.794
ENSMUSG00000016933	1.749	1.908	1.84	1.684	1.745	1.586	1.89
ENSMUSG00000016940	0.449	0.348	0.72	0.834	0.41	0.471	0.466
ENSMUSG00000016942	0.006	0.008	0.003	0.021	0.013	0.068	0.07
ENSMUSG00000016946	0.74	0.569	0.657	0.833	0.565	0.626	0.921
ENSMUSG00000016982	0.023	0.021	0	0.02	0.05	0	0
ENSMUSG00000016984	0.394	0.876	0.544	0.486	0.428	0.453	0.867
ENSMUSG00000016995	0.038	0.034	0.085	0.428	0.29	0.411	0.215
ENSMUSG00000016998	0	0.031	0	0.06	0.038	0.146	0
ENSMUSG00000017003	0.039	0	0	0.134	0	0.055	0
ENSMUSG00000017004	0.104	0.14	0	0.362	0.172	0.221	0.136
ENSMUSG00000017007	0.028	0.006	0.016	0.11	0.07	0.228	0.11
ENSMUSG00000017009	0.22	0.548	0.54	0.283	0.194	0.193	0.368
ENSMUSG00000017049	0.081	0	0	0.141	0	0.057	0
ENSMUSG00000017057	0.018	0.026	0.021	0.043	0.018	0.039	0.027
ENSMUSG00000017064	0.038	0.025	0.042	0.312	0.135	0.268	0.198
ENSMUSG00000017119	10.365	10.052	10.74	8.819	10.284	10.74	8.618
ENSMUSG00000017132	0.134	0.08	0.122	0.148	0.225	0.205	0.153
ENSMUSG00000017144	11.575	13.59	15.135	16.317	15.625	9.418	10.657
ENSMUSG00000017146	0.194	0.248	0.257	0.551	0.438	0.191	0.443
ENSMUSG00000017165	0	0	0.111	0.058	0	0.047	0.174
ENSMUSG00000017167	0.009	0.05	0.047	0.119	0.141	0.169	0.313
ENSMUSG00000017176	4.512	4.032	4.434	3.61	3.479	3.568	4.416
ENSMUSG00000017188	207.873	203.858	208.662	233.01	159.076	140.658	217.007
ENSMUSG00000017195	0.068	0.051	0.088	0.337	0.151	0.258	0.478
ENSMUSG00000017204	0.019	0.064	0.122	0.326	0.199	0.457	0.118
ENSMUSG00000017210	5.584	4.987	5.174	4.263	4.8	5.318	5.81
ENSMUSG00000017211	0.069	0.055	0.128	0.75	0.356	0.175	0.786
ENSMUSG00000017221	1.472	0.733	0.854	0.536	0.595	1.302	1.178
ENSMUSG00000017264	8.336	9.348	8.947	6.596	8.335	8.447	7.981
ENSMUSG00000017286	0.713	0.742	0.754	0.639	0.564	0.669	0.742
ENSMUSG00000017288	0.713	0.623	0.707	0.734	0.776	0.873	0.647
ENSMUSG00000017291	2.035	2.041	1.924	1.974	2.161	2.074	1.574
ENSMUSG00000017299	0.114	0.199	0.253	0.192	0.202	0.184	0.12
ENSMUSG00000017307	0.762	0.793	0.71	0.929	0.761	0.666	0.895
ENSMUSG00000017309	0.208	0.417	0.373	0.478	0.465	0.511	0.512
ENSMUSG00000017310	0	0	0	0	0.024	0.062	0.114
ENSMUSG00000017314	1.246	0.792	0.555	0.7	1.078	1.346	1.119
ENSMUSG00000017344	0.587	0.671	0.177	2.088	0.941	1.361	1.048
ENSMUSG00000017376	0.194	0.24	0.207	0.227	0.271	0.222	0.229
ENSMUSG00000017386	4.491	4.448	4.758	4.824	5.258	5.654	4.651
ENSMUSG00000017390	23.108	56.428	51.014	10.66	11.974	8.252	6.711
ENSMUSG00000017400	0.441	0.318	0.698	1.274	0.587	0.464	1.382
ENSMUSG00000017404	96.228	91.07	105.986	106.543	85.064	75.71	103.98
ENSMUSG00000017405	0.343	0.374	0.208	1.391	0.954	1.538	0.705
ENSMUSG00000017412	0.168	0.163	0.157	0.127	0.154	0.182	0.157
ENSMUSG00000017417	0.01	0.027	0.011	0.071	0.047	0.077	0.075
ENSMUSG00000017418	1.339	1.385	1.292	1.756	1.904	1.848	1.612
ENSMUSG00000017421	24.481	34.533	28.05	26.076	24.335	19.207	25.451
ENSMUSG00000017428	4.549	5.535	4.764	4.033	4.349	4.556	4.251
ENSMUSG00000017446	0.012	0.004	0.066	0.09	0.031	0.051	0.104
ENSMUSG00000017453	0.288	0.287	0.22	0.389	0.303	0.571	0.385
ENSMUSG00000017466	0.26	0.217	0.136	0.335	0.292	0.333	0.219
ENSMUSG00000017478	0.453	0.367	0.382	0.666	0.56	0.678	0.704
ENSMUSG00000017485	1.653	1.806	2.115	1.998	1.779	1.878	1.467
ENSMUSG00000017491	0.007	0.004	0.007	0.046	0.026	0.014	0.016
ENSMUSG00000017493	0.243	0.324	0.342	0.297	0.231	0.446	0.155
ENSMUSG00000017499	1.566	2.785	1.552	0.418	0.454	0.469	0.266
ENSMUSG00000017548	0.459	0.584	0.666	0.549	0.434	0.438	0.452
ENSMUSG00000017550	0.469	0.418	0.439	0.43	0.441	0.529	0.57
ENSMUSG00000017561	0.318	0.252	0.205	0.23	0.273	0.202	0.314
ENSMUSG00000017607	0.037	0.013	0.113	0.184	0.149	0.176	0.153
ENSMUSG00000017615	13.459	14.69	14.561	11.761	13.247	13.443	9.952
ENSMUSG00000017631	0.758	0.482	0.535	0.779	0.688	0.75	0.672
ENSMUSG00000017639	1.753	1.55	1.612	1.591	1.654	1.59	1.582
ENSMUSG00000017652	0.03	0.058	0.083	0.173	0.214	0.36	0.183
ENSMUSG00000017664	6.573	4.301	5.727	5.21	5.043	7.323	5.051
ENSMUSG00000017667	7.922	11.882	7.212	6.946	9.044	6.575	6.504
ENSMUSG00000017670	6.508	4.637	4.606	3.699	4.976	5.445	4.042
ENSMUSG00000017677	10.913	13.64	11.282	12.6	12.836	11.87	14.69
ENSMUSG00000017679	2.418	2.524	2.73	2.506	2.426	2.313	2.732
ENSMUSG00000017686	0.296	0.211	0.209	0.313	0.239	0.23	0.276
ENSMUSG00000017688	0.001	0	0	0.007	0.008	0.011	0.003
ENSMUSG00000017692	0.111	0.093	0.179	0.144	0.105	0.153	0.189
ENSMUSG00000017697	0.19	0.239	0.109	0.292	0.229	0.232	0.258
ENSMUSG00000017707	1.405	1.769	1.452	2.121	1.531	1.918	1.767
ENSMUSG00000017713	0.25	0	0.069	0.434	0.086	0.354	0.368
ENSMUSG00000017715	0.126	0.117	0.114	0.286	0.197	0.285	0.108
ENSMUSG00000017716	2.804	5.705	5.005	1.987	1.831	2.146	2.54
ENSMUSG00000017718	0.099	0.05	0.096	0.086	0.095	0.131	0.032
ENSMUSG00000017720	0	0	0.028	0	0.056	0	0.066
ENSMUSG00000017721	1.272	1.358	1.064	0.932	1.482	1.746	1.089
ENSMUSG00000017723	0.099	0.089	0.11	0.074	0.047	0.14	0.037
ENSMUSG00000017724	0.022	0.03	0.006	0.058	0.103	0.141	0.159
ENSMUSG00000017734	0.132	0.29	0.345	1.185	0.672	0.813	0.501
ENSMUSG00000017737	0.011	0.021	0	0.04	0.013	0.024	0.045
ENSMUSG00000017740	0.016	0.022	0.032	0.154	0.068	0.119	0.058
ENSMUSG00000017747	0	0.063	0.155	0.487	0.425	0.372	0.183
ENSMUSG00000017754	0.019	0.051	0	0.016	0.021	0.067	0.037
ENSMUSG00000017756	0.652	0.768	0.717	0.444	0.624	0.611	0.592
ENSMUSG00000017760	8.989	10.314	10.238	9.488	8.427	8.867	9.8
ENSMUSG00000017764	15.153	16.979	15.141	12.869	12.089	11.943	15.22
ENSMUSG00000017765	0.283	0.158	0.136	0.36	0.253	0.342	0.14
ENSMUSG00000017774	0.439	0.351	0.453	0.788	0.496	0.731	0.608
ENSMUSG00000017776	0.771	0.88	0.958	0.819	0.678	0.941	0.686
ENSMUSG00000017778	54.711	59.97	67.515	66.89	48.915	42.024	65.232
ENSMUSG00000017781	0.699	0.906	0.871	0.763	0.827	0.724	1.21
ENSMUSG00000017801	10.291	10.263	11.108	11.685	10.281	10.263	12.829
ENSMUSG00000017802	0.802	0.648	0.426	1.177	0.73	0.695	0.671
ENSMUSG00000017830	0.487	0.776	0.54	0.687	0.689	0.833	0.914
ENSMUSG00000017831	0.182	0.131	0.249	0.237	0.191	0.168	0.23
ENSMUSG00000017832	0.119	0	0	0.207	0.525	0	0.312
ENSMUSG00000017837	14.599	12.406	15.382	15.068	18.046	18.456	13.694
ENSMUSG00000017843	2.686	2.872	2.554	2.699	2.523	2.12	2.337
ENSMUSG00000017858	1.607	1.79	2.151	2.053	2.002	1.813	1.507
ENSMUSG00000017861	0.055	0.052	0.054	0.365	0.171	0.358	0.256
ENSMUSG00000017868	0.006	0	0.011	0.034	0.035	0.15	0.084
ENSMUSG00000017897	0.001	0.002	0.001	0.004	0	0.003	0.006
ENSMUSG00000017922	0.012	0	0	0.063	0.013	0.069	0
ENSMUSG00000017929	0.531	0.425	0.384	0.39	0.57	0.578	0.418
ENSMUSG00000017943	8.947	7.934	8.282	8.958	11.012	12.505	10.967
ENSMUSG00000017950	0	0.001	0	0.014	0.017	0.043	0.017
ENSMUSG00000017969	0.002	0.002	0	0.012	0	0.035	0
ENSMUSG00000017978	0.002	0.004	0.004	0.003	0.003	0.008	0.004
ENSMUSG00000017999	2.621	1.812	2.787	2.24	2.007	2.493	2.058
ENSMUSG00000018001	0.266	0.141	0.126	0.196	0.209	0.253	0.208
ENSMUSG00000018008	0.038	0.099	0.073	0.282	0.027	0.059	0.009
ENSMUSG00000018012	0.414	0.031	0.268	0.18	0.304	0.489	0.813
ENSMUSG00000018040	6.981	4.516	5.621	7.655	6.639	6.836	6.269
ENSMUSG00000018042	11.019	9.214	9.909	10.754	12.981	11.768	9.604
ENSMUSG00000018068	1.409	1.745	1.427	1.804	1.647	1.691	1.484
ENSMUSG00000018076	0.544	0.484	0.491	0.597	0.612	0.581	0.586
ENSMUSG00000018102	1.624	0.972	1.626	0.923	0.7	1.017	1.499
ENSMUSG00000018126	0.003	0.017	0.003	0.082	0.045	0.063	0.041
ENSMUSG00000018143	1.007	0.494	0.541	1.279	1.084	1.108	0.872
ENSMUSG00000018160	22.838	26.433	23.127	21.263	23.507	21.314	21.045
ENSMUSG00000018166	0.058	0.025	0.112	0.42	0.206	0.26	0.245
ENSMUSG00000018167	4.977	5.189	5.862	4.782	5.264	4.691	3.675
ENSMUSG00000018168	0.017	0.008	0.015	0.081	0.049	0.101	0.056
ENSMUSG00000018169	5.066	7.267	7.432	6.361	6.146	3.473	5.919
ENSMUSG00000018171	1.817	2.073	1.859	1.921	1.614	1.46	2.027
ENSMUSG00000018189	1.629	1.678	2.032	1.654	1.729	1.793	1.96
ENSMUSG00000018196	2.627	2.259	2.156	2.565	3.027	3.024	2.988
ENSMUSG00000018199	9.4	9.778	9.544	8.438	9.503	8.883	8.621
ENSMUSG00000018209	1.068	0.939	1.114	1.058	1.027	1.013	0.928
ENSMUSG00000018211	0.024	0	0.013	0.062	0	0.017	0
ENSMUSG00000018217	0.127	0.34	0.363	0.231	0.106	0.1	0.081
ENSMUSG00000018238	0.489	0.417	0.986	0.327	0.608	0.515	0.394
ENSMUSG00000018239	2.272	2.256	2.073	2.14	1.676	1.687	3.091
ENSMUSG00000018259	0.01	0	0	0.018	0	0	0.053
ENSMUSG00000018263	0.002	0.001	0.002	0.043	0.004	0.014	0.004
ENSMUSG00000018286	263.9	300.863	293.169	289.072	258.3	207.721	269.311
ENSMUSG00000018287	20.558	20.439	22.145	20.064	18.244	22.515	21.087
ENSMUSG00000018293	66.332	33.28	14.675	6.658	37.44	62.548	55.297
ENSMUSG00000018322	4.615	6.083	5.763	5.489	6.182	7.21	4.984
ENSMUSG00000018326	6.109	5.411	4.858	5.562	6.367	6.362	5.908
ENSMUSG00000018334	0.008	0.009	0.012	0.017	0.011	0.016	0.01
ENSMUSG00000018339	0.25	0.548	0.941	0.227	0.432	0.586	0.114
ENSMUSG00000018340	0.418	0.429	0.368	0.511	0.34	0.452	0.291
ENSMUSG00000018341	0.023	0.027	0.034	0.039	0.026	0.042	0.064
ENSMUSG00000018347	1.904	1.556	1.512	1.639	1.168	1.346	1.433
ENSMUSG00000018362	17.047	24.605	17.824	9.981	9.482	9.99	9.936
ENSMUSG00000018363	0.243	0.249	0.277	0.334	0.265	0.278	0.292
ENSMUSG00000018372	0.636	0.687	0.626	0.518	0.527	0.462	0.861
ENSMUSG00000018377	4.668	4.762	4.276	3.703	5.359	5.394	5.053
ENSMUSG00000018378	0.078	0.044	0.092	0.125	0.117	0.121	0.101
ENSMUSG00000018379	9.802	8.487	10.483	8.932	6.631	8.732	8.742
ENSMUSG00000018381	0.007	0.006	0.008	0.012	0.008	0.02	0.018
ENSMUSG00000018387	0.057	0.022	0.009	0.327	0.171	0.208	0.128
ENSMUSG00000018395	8.07	6.188	6.552	9.074	8.001	8.975	7.673
ENSMUSG00000018398	0.33	0.363	0.359	0.589	0.417	0.484	0.723
ENSMUSG00000018401	3.231	4.173	3.678	3.35	4.845	4.364	4.108
ENSMUSG00000018405	0.348	0.396	0.489	0.79	0.56	0.322	0.455
ENSMUSG00000018411	5.298	3.517	4.073	5.411	4.744	6.545	4.358
ENSMUSG00000018412	1.081	0.83	1.019	0.938	0.886	0.971	1.046
ENSMUSG00000018415	1.571	1.502	1.935	1.563	1.751	1.925	1.705
ENSMUSG00000018417	0.44	0.451	0.521	0.391	0.466	0.652	0.443
ENSMUSG00000018425	0.856	0.894	0.948	1.037	0.804	0.785	1.15
ENSMUSG00000018427	0.509	0.594	0.469	0.663	0.712	0.644	0.737
ENSMUSG00000018428	1.095	0.805	0.933	0.759	0.923	1.352	1.43
ENSMUSG00000018433	5.279	6.566	6.382	5.045	5.697	5.396	5.528
ENSMUSG00000018442	9.461	10.966	8.866	9.467	7.367	7.693	9.533
ENSMUSG00000018446	1.413	1.269	1.215	1.359	1.356	1.507	1.393
ENSMUSG00000018449	6.805	7.698	6.459	6.477	4.355	3.993	6.521
ENSMUSG00000018451	223.936	184.597	259.121	329.998	282.085	307.7	319.704
ENSMUSG00000018459	0.043	0.053	0.035	0.117	0.081	0.099	0.079
ENSMUSG00000018470	1.196	1.051	0.817	1.504	0.743	1.063	0.699
ENSMUSG00000018474	3.104	2.248	3.299	2.956	3.326	3.783	2.818
ENSMUSG00000018476	42.432	43.119	42.579	31.889	48.461	44.067	45.735
ENSMUSG00000018481	1.693	1.949	1.721	1.981	1.794	1.818	1.779
ENSMUSG00000018486	0.008	0	0	0.013	0.008	0.011	0.01
ENSMUSG00000018500	0	0.004	0.005	0.017	0.011	0	0.013
ENSMUSG00000018501	0.608	0.584	0.666	0.732	0.664	0.617	0.655
ENSMUSG00000018507	0.351	0.164	0.235	0.692	0.442	0.521	0.391
ENSMUSG00000018509	1.031	1.11	0.968	1.31	0.804	0.905	1.01
ENSMUSG00000018537	1.626	2.144	1.875	1.439	2.085	2.188	2.419
ENSMUSG00000018541	2.919	3.552	3.061	3.552	3.524	3.462	3.751
ENSMUSG00000018543	0.175	0.297	0.258	0.304	0.857	0.413	0.56
ENSMUSG00000018547	0.213	0.123	0.21	0.244	0.251	0.285	0.313
ENSMUSG00000018548	0.649	0.537	0.517	0.596	0.638	0.9	0.799
ENSMUSG00000018554	0.059	0.133	0.214	0.103	0.115	0.147	0.194
ENSMUSG00000018559	0.539	0.796	0.627	0.651	0.785	0.686	0.909
ENSMUSG00000018565	12.096	12.603	13.345	13.926	13.265	12.482	12.135
ENSMUSG00000018566	1.054	1.591	0.981	0.451	1.027	0.368	0.88
ENSMUSG00000018567	73.615	61.147	69.397	75.363	76.118	70.797	67.68
ENSMUSG00000018569	0.056	0.05	0.123	0.193	0	0.039	0.073
ENSMUSG00000018570	2.635	2.856	3.155	3.467	2.564	3.698	3.48
ENSMUSG00000018572	9.97	11.059	13.324	12.194	12.629	15.767	11.635
ENSMUSG00000018574	16.289	16.615	15.978	13.429	16.062	14.727	15.64
ENSMUSG00000018581	0.009	0.001	0.011	0.04	0.028	0.03	0.038
ENSMUSG00000018583	8.213	9.115	9.089	8.066	9.065	10.2	8.43
ENSMUSG00000018585	8.47	6.954	7.87	10.061	7.713	6.622	9.207
ENSMUSG00000018589	0.072	0.01	0.028	0.029	0.018	0.014	0.027
ENSMUSG00000018593	0.506	1.042	0.871	0.616	0.398	0.788	0.283
ENSMUSG00000018595	0.015	0	0	0.007	0.013	0.016	0
ENSMUSG00000018599	5.799	3.642	5.185	5.997	4.699	4.509	4.267
ENSMUSG00000018604	0.049	0.006	0.014	0.32	0.25	0.296	0.193
ENSMUSG00000018620	0.02	0.007	0.014	0.022	0.028	0.021	0.034
ENSMUSG00000018634	0.018	0.015	0.007	0.148	0.087	0.08	0.048
ENSMUSG00000018648	3.476	3.732	3.576	1.881	3.401	3.191	2.512
ENSMUSG00000018651	1.57	1.778	1.497	1.353	1.419	1.502	1.609
ENSMUSG00000018654	0.038	0.025	0.03	0.097	0.068	0.185	0.139
ENSMUSG00000018656	0.047	0.042	0.03	0.327	0.104	0.343	0.282
ENSMUSG00000018659	3.837	4.389	3.568	5.6	4.368	4.8	4.876
ENSMUSG00000018661	0.482	0.299	0.342	0.394	0.537	0.424	0.455
ENSMUSG00000018666	10.285	11.385	11.603	10.133	10.21	9.626	10.314
ENSMUSG00000018669	26.084	27.594	28.261	24.115	23.36	23.93	23.011
ENSMUSG00000018672	0.061	0.048	0.042	0.331	0.159	0.075	0.159
ENSMUSG00000018677	5.078	3.061	3.506	2.994	3.795	3.597	1.229
ENSMUSG00000018678	0.53	0.474	0.445	0.476	0.652	0.607	0.549
ENSMUSG00000018697	0.467	0.387	0.372	0.404	0.501	0.543	0.476
ENSMUSG00000018698	0	0.032	0.053	0.145	0.066	0.017	0.125
ENSMUSG00000018707	2.751	2.506	2.707	2.639	2.916	2.915	2.866
ENSMUSG00000018727	0.051	0.026	0	0.367	0.145	0.351	0.362
ENSMUSG00000018733	4.801	3.746	4.319	4.381	3.914	4.523	4.692
ENSMUSG00000018736	0.869	0.719	0.902	1.098	0.913	1.352	1.209
ENSMUSG00000018740	0.125	0.025	0.061	0.866	0.351	0.941	0.181
ENSMUSG00000018750	0.386	0.522	0.575	0.986	0.551	0.999	0.686
ENSMUSG00000018761	9.274	8.29	11.028	11.305	9.63	10.504	10.828
ENSMUSG00000018765	0.986	1.194	1.153	2.091	1.854	1.956	2.013
ENSMUSG00000018770	47.711	39.699	48.069	55.129	44.658	48.349	53.429
ENSMUSG00000018774	0.889	3.435	1.675	2.011	1.569	1.827	1.63
ENSMUSG00000018776	0	0	0	1.083	1.098	0.647	0.761
ENSMUSG00000018796	0.178	0.118	0.071	0.3	0.186	0.254	0.212
ENSMUSG00000018800	0.186	0.262	0.196	0.327	0.26	0.286	0.377
ENSMUSG00000018809	0.435	0.452	0.527	0.579	0.498	0.576	0.568
ENSMUSG00000018819	0.013	0.05	0.034	0.044	0.017	0.022	0.046
ENSMUSG00000018820	4.435	5.774	4.688	5.161	5.065	4.77	4.836
ENSMUSG00000018821	1.417	1.004	1.057	0.778	0.312	0.549	1.288
ENSMUSG00000018822	0.04	0.018	0.089	0.175	0.067	0.086	0.158
ENSMUSG00000018830	0.009	0.006	0.012	0.084	0.041	0.056	0.056
ENSMUSG00000018841	1.692	1.454	1.584	1.799	1.999	1.948	1.736
ENSMUSG00000018844	0.199	0.116	0.055	0.605	0.23	0.254	0.312
ENSMUSG00000018845	0.005	0.019	0.003	0.059	0.035	0.082	0.089
ENSMUSG00000018846	1.326	1.788	1.385	1.583	1.322	1.766	1.181
ENSMUSG00000018848	4.317	4.829	4.306	3.916	3.902	4.145	4.712
ENSMUSG00000018849	0.345	0.346	0.326	0.327	0.41	0.346	0.405
ENSMUSG00000018858	9.303	9.883	11.023	10.828	8.698	8.328	9.57
ENSMUSG00000018861	2.055	1.099	1.927	2.244	1.38	2.342	1.602
ENSMUSG00000018862	0.014	0	0	0	0.008	0.02	0
ENSMUSG00000018865	4.134	2.472	3.477	4.047	3.967	4.755	3.237
ENSMUSG00000018868	0.016	0.007	0	0.142	0.036	0.162	0.064
ENSMUSG00000018882	7.484	8.237	8.424	8.27	7.612	7.399	6.965
ENSMUSG00000018899	0.144	0.25	0.183	0.502	0.193	0.058	0.081
ENSMUSG00000018900	0.188	0.214	0.18	0.31	0.309	0.207	0.3
ENSMUSG00000018906	0.333	0.471	0.279	0.361	0.253	0.275	0.272
ENSMUSG00000018907	0.025	0.055	0.123	0.235	0.23	0.366	0.322
ENSMUSG00000018909	0.511	0.399	0.394	0.499	0.537	0.566	0.621
ENSMUSG00000018916	0.036	0.065	0.08	0.313	0.04	0.255	0.189
ENSMUSG00000018919	0.029	0.039	0.016	0.556	0.24	0.227	0.381
ENSMUSG00000018920	0.144	0.103	0.334	1.1	0.57	0.876	0.188
ENSMUSG00000018921	0.825	0.524	0.797	1.146	0.937	1.019	1.08
ENSMUSG00000018923	14.126	9.9	10.202	17.259	9.783	11.085	14.117
ENSMUSG00000018924	0	0	0.024	0.057	0.048	0.031	0
ENSMUSG00000018925	0	0.007	0.009	0.029	0.046	0.023	0.043
ENSMUSG00000018927	0	0.104	0.092	0.317	0.073	0.117	0.043
ENSMUSG00000018930	0.37	2.806	1.184	10.578	2.628	1.223	3.013
ENSMUSG00000018931	2.919	2.603	3.126	2.495	3.171	3.294	3.306
ENSMUSG00000018932	1.254	0.951	0.681	0.953	1.094	1.27	1.315
ENSMUSG00000018965	7.798	6.715	7.165	6.361	8.678	8.628	8.393
ENSMUSG00000018973	0.103	0.155	0.229	3.894	2.81	3.416	2.075
ENSMUSG00000018974	0.416	0.428	0.41	0.519	0.478	0.671	0.579
ENSMUSG00000018983	0.142	0.118	0.258	0.494	0.253	0.429	0.344
ENSMUSG00000018986	0.004	0	0.008	0.038	0.012	0.062	0.057
ENSMUSG00000018995	0.106	0.081	0.075	0.122	0.102	0.111	0.13
ENSMUSG00000018999	2.836	2.913	2.175	2.586	2.709	2.977	2.389
ENSMUSG00000019027	0.115	0.166	0.132	0.092	0.22	0.194	0.174
ENSMUSG00000019039	7.23	5.393	6.817	9.246	6.52	5.84	11.419
ENSMUSG00000019054	20.407	19.283	21.617	20.965	19.336	17.022	20.254
ENSMUSG00000019055	0.195	0.261	0.265	1.338	0.891	0.642	0.753
ENSMUSG00000019066	13.473	8.82	11.843	12.379	14.894	16.525	12.475
ENSMUSG00000019080	4.351	3.39	6.414	4.784	3.632	3.217	6.616
ENSMUSG00000019082	8.906	6.077	7.988	8.119	8.847	9.329	7.596
ENSMUSG00000019087	32.129	31.08	28.407	38.193	35.125	34.271	31.434
ENSMUSG00000019088	0.095	0.093	0.199	0.329	0.125	0.281	0.099
ENSMUSG00000019102	0.008	0.05	0.009	0.041	0.009	0.011	0.062
[truncated: 25,807 more rows]

## Sheet: GO_BP
Sox9_UP
Term	Overlap	P-value	Adjusted P-value	Z-score	Combined Score	Genes
extracellular matrix organization (GO:0030198)	48/359	5.12161e-11	1.02321e-07	-2.3808	38.3194	COL13A1;LAMA4;NRXN1;LAMA3;PLG;ITGAE;PLOD1;NID1;ITGAL;OLFML2A;LTBP1;COL19A1;LOXL1;ADAMTS5;ACAN;TTR;KDR;CYP1B1;MYH11;ITGB6;CAPN1;TPSAB1;PDGFRA;COL26A1;COL27A1;VWF;COL25A1;SERPINF2;NPNT;HSPG2;AGT;COL1A1;BMP4;KIF9;VCAN;COL4A1;CRISPLD2;COL5A3;ITGA11;COL4A3;COL5A2;ITGA7;COL6A3;COL9A3;COL6A5;MATN4;CD44;MATN3
extracellular structure organization (GO:0043062)	48/360	5.58369e-11	1.02321e-07	-2.3805	38.3144	COL13A1;LAMA4;NRXN1;LAMA3;PLG;ITGAE;PLOD1;ITGAL;NID1;OLFML2A;LTBP1;LOXL1;COL19A1;ADAMTS5;ACAN;TTR;KDR;CYP1B1;MYH11;ITGB6;CAPN1;TPSAB1;PDGFRA;COL26A1;COL27A1;VWF;COL25A1;SERPINF2;NPNT;HSPG2;AGT;COL1A1;BMP4;KIF9;VCAN;COL4A1;CRISPLD2;COL5A3;COL4A3;COL5A2;ITGA11;ITGA7;COL6A3;COL9A3;COL6A5;MATN4;CD44;MATN3
sensory perception (GO:0007600)	48/457	6.38389e-08	5.84924e-05	-2.33236	22.7326	CEMIP;PCDH15;GUCA1B;PKD1L3;ESPN;CACNA1F;TRPM1;FAM134B;EDNRA;OTOA;CDH3;SIX3;MYH14;BDKRB1;CYP1B1;ATP6V0A4;HMCN1;CRYM;ALOXE3;GPR179;EDN1;PDE6G;MRGPRX2;ABCC6;POU6F2;TAAR5;PAX3;KRT12;OPRM1;USH2A;POU4F1;VAX2;COL1A1;RPGRIP1;P2RX7;CACNB2;TMIE;MC1R;ADORA2A;FAM161A;P2RX3;GJB3;PRPH2;COL4A3;PNOC;RGR;PLCB2;CNGB1
extracellular matrix disassembly (GO:0022617)	22/116	5.01602e-08	5.84924e-05	-2.18294	21.2762	COL26A1;COL13A1;COL25A1;LAMA3;PLG;NID1;HSPG2;COL19A1;COL1A1;ADAMTS5;ACAN;KIF9;COL4A1;COL5A3;COL4A3;COL5A2;COL6A3;COL9A3;CAPN1;COL6A5;TPSAB1;CD44
actomyosin structure organization (GO:0031032)	13/57	4.90425e-06	0.00299568	-2.14074	12.4389	MYBPC3;PDGFRA;KLHL41;MYPN;TTN;EPB41L4B;KRT19;MYH3;OBSCN;MYL2;ANKRD1;MYH14;MYOZ1
muscle tissue morphogenesis (GO:0060415)	13/56	4.14797e-06	0.00299568	-2.1391	12.4294	DSP;MYBPC3;RYR2;MYLK2;POU4F1;MYLK;TTN;TGFBR3;MYL2;PKP2;ANKRD1;TNNI1;PITX2
cardiac muscle tissue morphogenesis (GO:0055008)	12/50	7.2518e-06	0.00379683	-2.18153	12.159	TGFBR3;DSP;MYBPC3;RYR2;MYLK2;MYL2;PKP2;ANKRD1;TNNI1;PITX2;POU4F1;TTN
regulation of response to wounding (GO:1903034)	35/347	9.08506e-06	0.00416209	-2.4755	13.57	KANK1;RORA;PLG;GATA3;NOD2;TNFRSF11A;MEFV;MYLK;SPN;EDNRA;TSPAN8;NLRP6;C9;CD36;WNT4;CCR2;STAT5A;PDGFRA;EDN1;DMTN;SCARA5;IL1R1;SERPINF1;SERPINF2;FAM46A;OSM;OMG;F2;OSMR;AGT;ADORA2A;CD28;ZP3;PPARD;IDO1
muscle contraction (GO:0006936)	24/195	1.31436e-05	0.00535238	-2.26871	11.8658	MYBPC3;RYR2;MYLK2;EDN1;HTR1D;AGT;KLHL41;MYOM2;MYLK;TTN;MYL4;EDNRA;DES;MYH3;P2RX3;MYL2;TNNT3;MYH13;SCN7A;MYH14;MYH11;ANKRD2;MYH4;CRYAB
muscle system process (GO:0003012)	26/237	3.58219e-05	0.010099	-2.29047	10.5254	MYLK2;RYR2;MYOM2;MYLK;TTN;EDNRA;MYH13;MYH14;SCN7A;MYH11;ANKRD2;MYBPC3;EDN1;HTR1D;IGF1;AGT;KLHL41;MYL4;DES;MYH3;P2RX3;MYL2;TNNT3;MRVI1;MYH4;CRYAB
peptidyl-tyrosine phosphorylation (GO:0018108)	20/152	2.90843e-05	0.010099	-2.21896	10.1968	ALK;STAT5A;ITK;DYRK4;PDGFRA;SRMS;FLT1;EPHA10;FLT3;OSM;PTK6;MST1R;MERTK;PRLR;GHR;RELN;ERBB3;LEP;KDR;EPHA1
peptidyl-tyrosine modification (GO:0018212)	20/154	3.44009e-05	0.010099	-2.21651	10.1856	ALK;STAT5A;ITK;PDGFRA;DYRK4;SRMS;FLT1;EPHA10;FLT3;OSM;PTK6;MST1R;MERTK;PRLR;GHR;RELN;ERBB3;LEP;KDR;EPHA1
cell-substrate adhesion (GO:0031589)	19/140	3.12757e-05	0.010099	-2.19379	10.0812	VWF;COL13A1;NID1;ITGAL;MERTK;NPNT;AGT;PPFIBP1;BCAM;OTOA;COL5A3;ITGA11;MICALL2;ITGA7;ITGB6;SIGLEC1;EPHA1;CD44;PPARD
single organism cell adhesion (GO:0098602)	27/259	5.70447e-05	0.0139379	-2.30477	9.84862	NLGN3;COL13A1;ZAN;NRXN1;NRXN3;ITGAL;GATA1;NTN1;COL19A1;TSPAN32;PKHD1;SRPX2;CDH3;MICALL2;CYP1B1;CTNNA3;DSP;PDGFRA;NPNT;MERTK;LEP;PKP2;ITGA7;PKP1;SIGLEC1;EPHA1;CD44
collagen catabolic process (GO:0030574)	13/74	5.55205e-05	0.0139379	-2.1326	9.11291	COL26A1;COL13A1;COL25A1;COL19A1;KLK6;COL1A1;COL4A1;COL5A3;COL5A2;COL4A3;COL6A3;COL9A3;COL6A5
actin-myosin filament sliding (GO:0033275)	1938-09-01	0.000110669	0.017688	-2.36009	9.52266	MYL4;MYBPC3;DES;MYH3;MYL2;TNNT3;TNNI1;MYH4;TTN
muscle filament sliding (GO:0030049)	1938-09-01	0.000110669	0.017688	-2.35633	9.50747	MYL4;MYBPC3;DES;MYH3;MYL2;TNNT3;TNNI1;MYH4;TTN
secretion by cell (GO:0032940)	36/415	0.000125481	0.017688	-2.356	9.50616	NECAB3;GLS2;NRXN1;NRXN3;CACNA1A;LTBP2;PLG;GATA3;PCSK6;CPLX2;ABCA12;CRHR1;TTN;NKD2;FAM3B;CD36;ABCC4;UNC13C;EDN1;DMTN;VWF;BDNF;SERPINF2;SLC6A11;IGF1;CARTPT;MERTK;AGT;TBX3;UNC13D;SYTL2;LEP;VAMP1;CBLN4;MYO1F;PF4
tissue morphogenesis (GO:0048729)	33/358	8.36775e-05	0.017688	-2.34024	9.44256	MYLK2;RYR2;FLT1;SEMA3C;PCDH15;SEMA3E;NTN1;TTN;MYLK;EDNRA;TNNI1;KDR;ANKRD1;PITX2;WNT4;DSP;MYBPC3;STAT5A;EDN1;VDR;MICAL2;IGF1;NPNT;ESR1;POU4F1;AGT;TBX3;TGFBR3;BMP4;COL4A1;MYL2;PKP2;CD44
regulation of phospholipase activity (GO:0010517)	14/89	8.43858e-05	0.017688	-2.2199	8.957	PDGFRA;ITK;FLT1;AVPR1B;ITPR2;ADCY8;ESR1;AGT;EDNRA;ADCY9;ANXA8;PLA2R1;PLCB2;S1PR4
positive regulation of response to wounding (GO:1903036)	17/130	0.000121476	0.017688	-2.21807	8.94963	STAT5A;KANK1;DMTN;SERPINF2;OSM;PLG;TNFRSF11A;F2;OSMR;AGT;MYLK;EDNRA;CD28;CD36;ZP3;CCR2;IDO1
positive regulation of phospholipase C activity (GO:0010863)	1967-12-01	9.05814e-05	0.017688	-2.16654	8.74169	PDGFRA;ITK;EDNRA;FLT1;ADCY9;AVPR1B;ITPR2;ADCY8;S1PR4;PLCB2;ESR1;AGT
regulation of phospholipase C activity (GO:1900274)	1969-12-01	0.000116038	0.017688	-2.15881	8.71049	PDGFRA;ITK;EDNRA;FLT1;ADCY9;AVPR1B;ITPR2;ADCY8;S1PR4;PLCB2;ESR1;AGT
visual perception (GO:0007601)	22/195	9.70091e-05	0.017688	-2.13758	8.62486	PDE6G;ABCC6;POU6F2;PCDH15;GUCA1B;KRT12;CACNA1F;USH2A;VAX2;RPGRIP1;TRPM1;COL1A1;CACNB2;CDH3;FAM161A;PRPH2;SIX3;CYP1B1;HMCN1;RGR;CNGB1;GPR179
sensory perception of light stimulus (GO:0050953)	22/198	0.000118708	0.017688	-2.13371	8.60924	PDE6G;ABCC6;POU6F2;PCDH15;GUCA1B;KRT12;CACNA1F;USH2A;VAX2;RPGRIP1;TRPM1;COL1A1;CACNB2;CDH3;FAM161A;PRPH2;SIX3;CYP1B1;HMCN1;RGR;CNGB1;GPR179
multicellular organismal catabolic process (GO:0044243)	13/80	0.000112262	0.017688	-2.11094	8.51736	COL26A1;COL13A1;COL25A1;COL19A1;KLK6;COL1A1;COL4A1;COL5A3;COL5A2;COL4A3;COL6A3;COL9A3;COL6A5
negative regulation of vasculature development (GO:1901343)	1970-12-01	0.000130916	0.0177707	-2.12279	8.55529	BMP4;ANGPT4;ANGPT2;SERPINF1;STAB1;COL4A3;SEMA3E;VASH1;AGT;CCR2;WNT4;PF4
positive regulation of ion transport (GO:0043270)	21/186	0.000137528	0.0179175	-2.31466	9.30951	NLGN3;RYR2;CEMIP;CHRM1;GIMAP5;TNFRSF11A;F2;MYLK;P2RX7;CACNB2;EDNRA;RELN;ADORA2A;P2RX3;LEP;PLA2G10;PKP2;CNTN1;BDKRB1;ZP3;PLA2R1
multicellular organismal metabolic process (GO:0044236)	14/94	0.000141775	0.0179175	-2.09873	8.44103	COL26A1;COL13A1;COL25A1;COL19A1;KLK6;GHR;COL1A1;COL4A1;COL5A3;COL4A3;COL5A2;COL6A3;COL9A3;COL6A5
collagen metabolic process (GO:0032963)	13/83	0.000155883	0.0190437	-2.09287	8.28991	COL26A1;COL13A1;COL25A1;COL19A1;KLK6;COL1A1;COL4A1;COL5A3;COL5A2;COL4A3;COL6A3;COL9A3;COL6A5
positive regulation of phosphatidylinositol 3-kinase signaling (GO:0014068)	1951-10-01	0.000181483	0.021456	-2.13821	8.21446	PDGFRA;FLT1;RELN;ERBB3;FLT3;KDR;IGF1;F2;AGT;PPARD
single organismal cell-cell adhesion (GO:0016337)	24/235	0.000192989	0.0221033	-2.24921	8.57404	DSP;NLGN3;PDGFRA;COL13A1;ZAN;NRXN1;NRXN3;ITGAL;NPNT;GATA1;NTN1;COL19A1;TSPAN32;PKHD1;SRPX2;CDH3;LEP;PKP2;ITGA7;PKP1;CYP1B1;CTNNA3;SIGLEC1;CD44
positive regulation of MAPK cascade (GO:0043410)	34/395	0.000219858	0.0244176	-2.38245	8.84472	ALK;FLT1;FLT3;DIXDC1;TGFA;NOD2;TNFRSF11A;MST1R;PIK3R6;PIK3R5;GHR;EDNRA;IRAK2;KDR;CD36;SASH1;PDGFRA;EDN1;MAP3K1;PDE6G;SERPINF2;OSM;OPRM1;IGF1;CARTPT;NPNT;ADRA2B;AGT;BMP4;LEP;ACKR3;CD27;CSPG4;CD44
positive regulation of peptidyl-tyrosine phosphorylation (GO:0050731)	17/139	0.000250542	0.0264639	-2.2039	8.00452	ANGPT4;FLT3;OSM;TGFA;IGF1;NOD2;ADRA2B;GATA1;AGT;GHR;CD4;RELN;ERBB3;LEP;CSPG4;CD36;CD44
cell-matrix adhesion (GO:0007160)	14/100	0.000252725	0.0264639	-2.18402	7.9323	COL13A1;NID1;ITGAL;NPNT;AGT;PPFIBP1;BCAM;OTOA;COL5A3;ITGA11;ITGA7;ITGB6;SIGLEC1;CD44
regulation of vasculature development (GO:1901342)	21/197	0.000282153	0.0285355	-2.23165	7.93709	ANGPT4;ANGPT2;FLT1;SERPINF1;SEMA3E;VASH1;GATA2;AGT;PIK3R6;BMP4;SRPX2;COL4A3;STAB1;KDR;CYP1B1;ASB4;EPHA1;SASH1;CCR2;WNT4;PF4
multicellular organismal macromolecule metabolic process (GO:0044259)	13/89	0.00028808	0.0285355	-2.09326	7.44492	COL26A1;COL13A1;COL25A1;COL19A1;KLK6;COL1A1;COL4A1;COL5A3;COL4A3;COL5A2;COL6A3;COL9A3;COL6A5
regulation of cell activation (GO:0050865)	35/420	0.000314012	0.0295091	-2.43021	8.56175	SLC46A2;FLT3;RORA;GATA3;GIMAP5;IKZF1;NOD2;ITGAL;IKZF3;TSPAN32;CRHR1;IL27RA;SPN;SPTA1;CCR2;STAT5A;PDGFRA;DMTN;CD300A;ZBTB16;IGF1;MERTK;F2;FOXN1;UNC13D;BMP4;PTPRE;CD4;ADORA2A;LEP;PLA2G10;CD28;CD27;ZP3;IDO1
negative regulation of blood vessel morphogenesis (GO:2000181)	1966-11-01	0.000307407	0.0295091	-2.08804	7.35628	ANGPT4;ANGPT2;SERPINF1;STAB1;COL4A3;SEMA3E;VASH1;AGT;CCR2;WNT4;PF4
actin-mediated cell contraction (GO:0070252)	1946-09-01	0.000384784	0.0352163	-2.17462	7.27682	MYL4;MYBPC3;MYH3;DES;MYL2;TNNT3;TNNI1;MYH4;TTN
positive regulation of phospholipase activity (GO:0010518)	1980-12-01	0.000393961	0.0352163	-2.12311	7.10447	PDGFRA;ITK;EDNRA;FLT1;ADCY9;AVPR1B;ITPR2;ADCY8;PLCB2;S1PR4;ESR1;AGT
sarcomere organization (GO:0045214)	2016-07-27	0.000404232	0.0352741	-2.39044	7.99509	MYBPC3;KRT19;OBSCN;MYH3;ANKRD1;MYPN;TTN
positive regulation of cell migration (GO:0030335)	26/280	0.000417839	0.0354723	-2.3778	7.93948	CEMIP;NRP2;FLT1;ONECUT2;GATA3;MYLK;EDNRA;SRPX2;RELN;KDR;BDKRB1;SASH1;CCR2;ANGPT4;PDGFRA;EDN1;CAMK1D;DMTN;SEMA6A;IGF1;AGT;COL1A1;BMP4;ZP3;EPHA1;MYO1F
regulation of peptidyl-tyrosine phosphorylation (GO:0050730)	20/189	0.000425861	0.0354723	-2.23808	7.47295	ANGPT4;DMTN;CD300A;FLT3;OSM;TGFA;PTK6;IGF1;NOD2;GATA1;ADRA2B;AGT;GHR;CD4;RELN;ERBB3;LEP;CSPG4;CD36;CD44
angiogenesis (GO:0001525)	23/236	0.000478653	0.0389836	-2.20265	7.14675	ANGPT4;NRP2;ANGPT2;FLT1;NRXN1;NRXN3;TGFA;RORA;SEMA3E;VASH1;ADRA2B;HSPG2;PIK3R6;BMP4;PTPRB;SRPX2;KDR;HOXA3;CYP1B1;ACKR3;CSPG4;EPHA1;HOXA7
ventricular cardiac muscle tissue morphogenesis (GO:0055010)	1938-08-01	0.000528621	0.0418584	-2.26186	7.17793	TGFBR3;DSP;MYBPC3;RYR2;MYL2;TNNI1;PKP2;POU4F1
synaptic transmission (GO:0007268)	35/434	0.000548214	0.0418584	-2.23537	7.09387	MYLK2;CHRM1;CNP;GLS2;NRXN1;RASGRF2;SLC1A1;CHRNA9;CACNA1A;ADCY8;CACNA1G;NPY;DLGAP1;GRIA3;GRIA4;GABBR2;UNC13C;KCNH4;KCNJ6;KCNB1;HTR1D;TAAR5;KCNJ16;SLC6A11;CARTPT;GRIP2;CACNB2;GRIN3A;ADCY9;ADORA2A;P2RX3;PNOC;GNB3;VAMP1;PLCB2
regulation of lipase activity (GO:0060191)	15/122	0.000541309	0.0418584	-2.15553	6.84049	PDGFRA;ITK;FLT1;AVPR1B;CD300A;ITPR2;ADCY8;ESR1;AGT;EDNRA;ADCY9;ANXA8;PLA2R1;S1PR4;PLCB2
positive regulation of cell motility (GO:2000147)	26/287	0.000588545	0.0437577	-2.36399	7.39715	CEMIP;NRP2;FLT1;ONECUT2;GATA3;MYLK;EDNRA;SRPX2;RELN;KDR;BDKRB1;SASH1;CCR2;ANGPT4;PDGFRA;EDN1;CAMK1D;DMTN;SEMA6A;IGF1;AGT;COL1A1;BMP4;ZP3;EPHA1;MYO1F
regulation of cell adhesion (GO:0030155)	29/336	0.000601614	0.0437577	-2.33529	7.30734	KANK1;ONECUT2;LAMA4;LAMA3;PLG;SEMA3E;ITGAL;NID1;SPN;ERBB3;KDR;CYP1B1;CD36;HOXA7;WNT4;STAT5A;COL26A1;DMTN;ANGPT2;SERPINF2;NPNT;PRLR;COL1A1;NINJ1;PLXNB3;EPHA1;DSCAML1;MYO1F;CD44
receptor-mediated endocytosis (GO:0006898)	17/152	0.000639386	0.0437577	-2.15536	6.7443	NLGN3;CUBN;SCARA5;CD163L1;TMPRSS5;SUSD2;TMPRSS4;ILDR1;LRP2;PLD2;GHR;STAB1;ENPP2;ACKR3;CD36;PLA2R1;FOLR1
vascular endothelial growth factor signaling pathway (GO:0038084)	2016-05-13	0.000649306	0.0437577	-2.12051	6.63526	PDGFRA;NRP2;FLT1;FLT3;KDR
sensory perception of pain (GO:0019233)	1950-09-01	0.000656664	0.0437577	-2.07993	6.5083	P2RX7;FAM134B;EDNRA;EDN1;MC1R;MRGPRX2;BDKRB1;OPRM1;ALOXE3
actin filament-based movement (GO:0030048)	1961-10-01	0.00064173	0.0437577	-2.06422	6.45911	MYL4;MYBPC3;MYH3;DES;MYL2;TNNT3;TNNI1;MYH14;MYH4;TTN
vocalization behavior (GO:0071625)	2016-05-13	0.000649306	0.0437577	-2.05305	6.42418	NLGN3;SRPX2;NRXN1;NRXN3;MYH14
Sox9_DOWN
Term	Overlap	P-value	Adjusted P-value	Z-score	Combined Score	Genes
mitotic cell cycle (GO:0000278)	111/404	1.84468e-48	6.45823e-45	-2.30482	234.517	ERCC6L;NUP107;NUP188;GMNN;BUB1B;CASC5;SMC4;SMC2;PPP1CB;CDC20;FBXO5;SKP2;LIG1;VRK1;ESCO2;CDC25C;CDC25B;NUP93;CCNE2;KIF20A;ANAPC1;MAD1L1;PSMD11;SET;TUBGCP2;CDCA5;CUL1;CDCA8;NCAPG;PMF1;SKA1;NCAPH;SKA2;CCNB2;ORC4;CCNB1;DSN1;NUP85;ORC3;UBE2C;NEK6;XRCC2;PLK1;CDC7;CDC6;NDC80;DHFR;CDK6;STAG2;CDK2;CDK1;UBA3;TOP2A;CDKN1B;MCM7;MCM10;FOXM1;CKS1B;XPO1;SGOL1;CNTRL;NUF2;RFC3;HSP90AA1;RFC4;NUP133;KIF23;TUBG1;SMC…
organelle fission (GO:0048285)	75/325	2.09611e-28	2.86121e-25	-2.34593	132.577	DCLRE1A;USP37;ERCC6L;CCNF;BUB1B;CASC5;KIF11;MKI67;KIF15;CDC20;SGOL1;MIS18BP1;NUF2;PBK;DNM1L;CEP55;HELLS;PBRM1;TIPIN;RPS6;VRK1;KIF22;CDC25C;TERF1;SMC1A;CKAP5;CIT;HAUS1;CDC25B;CKS2;BIRC5;KIF2C;FAM64A;ANAPC1;MAD1L1;CDCA2;CDCA3;TTYH1;CDCA5;KLHL13;SKA3;PMF1;SKA1;AURKB;SKA2;AURKA;CCNB2;DSN1;KATNA1;RBBP8;MCMBP;RAD54L;BUB1;PEX19;XRCC2;NDE1;NEK6;PLK1;RPA1;CDC6;NDC80;ZC3HC1;TPX2;ANLN;NEDD1;CENPF;STAG2;RAD5…
nuclear division (GO:0000280)	72/298	2.45176e-28	2.86121e-25	-2.31077	130.589	DCLRE1A;USP37;ERCC6L;CCNF;BUB1B;CASC5;KIF11;MKI67;KIF15;CDC20;SGOL1;MIS18BP1;NUF2;PBK;CEP55;HELLS;PBRM1;TIPIN;RPS6;VRK1;KIF22;CDC25C;TERF1;SMC1A;CKAP5;CIT;HAUS1;CDC25B;CKS2;BIRC5;KIF2C;FAM64A;ANAPC1;MAD1L1;CDCA2;CDCA3;TTYH1;CDCA5;KLHL13;SKA3;PMF1;SKA1;AURKB;SKA2;AURKA;CCNB2;DSN1;KATNA1;RBBP8;MCMBP;RAD54L;BUB1;XRCC2;NDE1;NEK6;PLK1;RPA1;CDC6;NDC80;ZC3HC1;TPX2;NEDD1;ANLN;CENPF;STAG2;RAD51;CDK2;CDK1;…
mitotic nuclear division (GO:0007067)	65/240	5.20673e-28	4.55719e-25	-2.27183	127.331	DCLRE1A;USP37;ERCC6L;CCNF;BUB1B;CASC5;KIF11;KIF15;CDC20;SGOL1;MIS18BP1;NUF2;PBK;CEP55;HELLS;TIPIN;PBRM1;RPS6;VRK1;KIF22;TERF1;CDC25C;CKAP5;HAUS1;CDC25B;CIT;BIRC5;FAM64A;KIF2C;ANAPC1;MAD1L1;CDCA2;CDCA3;TTYH1;CDCA5;KLHL13;SKA3;PMF1;SKA1;AURKB;SKA2;AURKA;CCNB2;DSN1;KATNA1;RBBP8;MCMBP;BUB1;NEK6;NDE1;PLK1;CDC6;NDC80;ZC3HC1;TPX2;ANLN;NEDD1;CENPF;STAG2;CDK2;CDK1;CENPN;SPC24;SPC25;NUP37
cell cycle phase transition (GO:0044770)	62/280	8.97075e-23	6.28132e-20	-2.31391	102.308	USP37;CDKN1B;MCM7;BUB1B;MCM10;FOXM1;CKS1B;PPP1CB;PPP6C;CNTRL;FBXO5;SKP2;HSP90AA1;TIPIN;RPS6;TERF1;CDC25C;TUBG1;CKAP5;CDC25B;CIT;MELK;PSMA1;CCNE2;MCM3;BIRC5;MCM4;MCM5;BCAT1;MCM2;PRIM2;PSMD11;PCNA;TUBGCP2;PRIM1;CDCA5;CUL1;TYMS;AURKA;ORC4;CCNB2;CCNB1;CDC45;PSMB2;ORC3;RBBP8;RRM2;NDE1;PLK1;RPA1;RPA2;CDC7;CDC6;DHFR;NEDD1;PSMC5;CENPF;CDK6;PSMC1;CDK2;CDK1;CDKN3
mitotic cell cycle phase transition (GO:0044772)	61/277	2.58654e-22	1.50925e-19	-2.3132	100.248	USP37;CDKN1B;MCM7;BUB1B;MCM10;FOXM1;CKS1B;PPP1CB;PPP6C;CNTRL;FBXO5;SKP2;HSP90AA1;RPS6;TERF1;CDC25C;TUBG1;CKAP5;CDC25B;CIT;MELK;PSMA1;CCNE2;MCM3;BIRC5;MCM4;MCM5;BCAT1;MCM2;PRIM2;PSMD11;PCNA;TUBGCP2;PRIM1;CDCA5;CUL1;TYMS;AURKA;CCNB2;ORC4;CCNB1;CDC45;PSMB2;ORC3;RBBP8;RRM2;NDE1;PLK1;RPA1;RPA2;CDC7;CDC6;DHFR;NEDD1;PSMC5;CENPF;CDK6;PSMC1;CDK2;CDK1;CDKN3
cell cycle G1/S phase transition (GO:0044843)	41/152	5.65171e-18	2.19852e-15	-2.22041	74.9409	PRIM2;USP37;CDKN1B;PSMD11;PCNA;MCM7;PRIM1;CDCA5;CUL1;MCM10;TYMS;CKS1B;PPP6C;ORC4;CCNB1;CDC45;PSMB2;ORC3;RBBP8;FBXO5;SKP2;RRM2;RPS6;RPA1;RPA2;CDC7;CDC6;DHFR;PSMC5;CDK6;CCNE2;PSMA1;PSMC1;CDK2;CDK1;MCM3;MCM4;MCM5;BCAT1;MCM2;CDKN3
G1/S transition of mitotic cell cycle (GO:0000082)	41/152	5.65171e-18	2.19852e-15	-2.21819	74.8662	PRIM2;USP37;CDKN1B;PSMD11;PCNA;MCM7;PRIM1;CDCA5;CUL1;MCM10;TYMS;CKS1B;PPP6C;ORC4;CCNB1;CDC45;PSMB2;ORC3;RBBP8;FBXO5;SKP2;RRM2;RPS6;RPA1;RPA2;CDC7;CDC6;DHFR;PSMC5;CDK6;CCNE2;PSMA1;PSMC1;CDK2;CDK1;MCM3;MCM4;MCM5;BCAT1;CDKN3;MCM2
chromosome segregation (GO:0007059)	33/89	4.49293e-18	2.19852e-15	-2.16409	73.0401	TOP2A;DDX3X;KIF11;SKA3;SMC4;PMF1;SKA1;SMC2;SKA2;DSN1;SGOL1;NUF2;NUSAP1;BUB3;BUB1;SPAG5;NEK6;PLK1;KLHL22;ESCO2;SMC1A;KNSTRN;NDC80;CIT;CENPF;BIRC5;KIF2C;CENPN;SLC25A5;SPC25;MAD2L1;ARL8B;NUP37
regulation of cell cycle process (GO:0010564)	68/481	1.10961e-15	3.88476e-13	-2.43591	69.6099	TOP2A;CDKN1B;DDX3X;CCNF;BUB1B;FOXM1;CDC20;XPO1;GPER1;CHORDC1;NUSAP1;FBXO5;GTSE1;MED1;TIPIN;H2AFY;RPS6;KIF23;TERF1;CDC25C;SMC1A;CDC25B;CIT;DDB1;SFRP1;PSRC1;PSMA1;DDX39B;BIRC5;ANAPC1;MAD1L1;PSMD11;CDCA5;TTK;AURKB;AURKA;NEUROD1;CCNB1;PSMB2;PDPN;BUB3;BRD7;ECT2;BUB1;RANBP1;NPM1;UBE2C;NEK6;PLK1;KLHL22;RPA2;CDC7;FOXN3;CDC6;PBX1;TPX2;CENPE;ANLN;PSMC5;CENPF;STAG2;MYBBP1A;PSMC1;RFWD3;CDK2;CDK1;MAD2L1;CUL4B
chromosome organization (GO:0051276)	42/204	8.29589e-15	2.64036e-12	-2.27258	60.5873	TOP2A;PRIM2;RTEL1;PCNA;PRIM1;CDCA5;NCAPG;CDCA8;SMC4;CENPA;NCAPH;SMC2;POLD3;GPER1;NUSAP1;MCMBP;RAD54L;BUB3;XRCC6;RFC3;RFC4;SPAG5;LIG1;PTGES3;PLK1;RPA1;KLHL22;RPA2;TERF1;SMC1A;KNSTRN;NDC80;CIT;CENPE;CENPF;STAG2;CENPI;DKC1;CDK1;NCAPD2;CENPN;MAD2L1
DNA replication (GO:0006260)	39/186	4.66006e-14	1.35957e-11	-2.23884	56.0187	SLBP;SET;MCM7;MCM10;TNFAIP1;TBRG1;POLD3;ING5;ORC4;CHAF1B;CDC45;ORC3;MCMBP;GINS2;RFC3;RRM1;RFC4;RRM2;LIG1;PTGES3;RPA1;RPA2;CDC7;NAP1L1;CDC6;SSRP1;TERF1;CDC25C;NASP;DKC1;CINP;CDK2;CDK1;MCM3;MCM4;MCM5;SSBP1;DTL;MCM2
regulation of chromosome segregation (GO:0051983)	23/63	7.03091e-13	1.89348e-10	-2.25557	50.4965	SPAG5;UBE2C;CDCA5;PLK1;KLHL22;BUB1B;TTK;CDC6;TERF1;KNSTRN;AURKB;CIT;CDC20;CENPF;CCNB1;KIF2C;FBXO5;BUB3;ECT2;BUB1;MAD1L1;ANAPC1;MAD2L1
cell cycle checkpoint (GO:0000075)	34/156	7.92531e-13	1.98189e-10	-2.24915	50.2501	TOP2A;BUB1B;CASC5;TTK;BRCC3;AURKB;CDC20;CCNB1;CDC45;RBBP8;BUB3;BUB1;TIPIN;UBE2C;NEK6;PLK1;RPS6;KLHL22;RPA2;CDC6;FOXN3;TERF1;SMC1A;CENPF;CCNE2;RFWD3;CDK2;CDK1;BIRC5;INTS7;DTL;ANAPC1;MAD1L1;MAD2L1
regulation of mitotic cell cycle phase transition (GO:1901990)	42/251	3.6781e-12	8.5847e-10	-2.36494	49.3703	TOP2A;CDKN1B;PSMD11;DDX3X;BUB1B;TTK;AURKB;CDC20;CCNB1;PSMB2;PDPN;FBXO5;BUB3;BRD7;GTSE1;BUB1;TIPIN;UBE2C;NEK6;RPS6;PLK1;KLHL22;RPA2;CDC7;CDC6;FOXN3;TERF1;SMC1A;PBX1;DDB1;CENPE;PSMC5;CENPF;PSMA1;PSMC1;RFWD3;CDK2;CDK1;ANAPC1;MAD1L1;MAD2L1;CUL4B
regulation of cell cycle phase transition (GO:1901987)	43/264	4.45264e-12	9.74294e-10	-2.34954	48.7513	TOP2A;CDKN1B;PSMD11;DDX3X;BUB1B;TTK;AURKB;CDC20;CCNB1;PSMB2;PDPN;FBXO5;BUB3;BRD7;GTSE1;BUB1;TIPIN;H2AFY;UBE2C;NEK6;RPS6;PLK1;KLHL22;RPA2;CDC7;CDC6;FOXN3;TERF1;SMC1A;PBX1;DDB1;CENPE;PSMC5;CENPF;PSMA1;PSMC1;RFWD3;CDK2;CDK1;ANAPC1;MAD1L1;MAD2L1;CUL4B
microtubule cytoskeleton organization (GO:0000226)	41/245	6.67752e-12	1.37518e-09	-2.35565	48.0662	CD63;GPSM2;TUBGCP2;CEP120;CASC5;TTK;KIF11;CENPA;AURKB;AURKA;TUBA1B;SGOL1;KATNA1;NUSAP1;FLNA;FBXO5;BUB3;BBS2;RANBP1;GAS2L3;SPAG5;NDE1;NEK6;PLK1;SMC1A;TUBG1;EML1;CKAP5;KNSTRN;NDC80;HAUS1;PSRC1;PRC1;TACC3;CDK1;BIRC5;SPRY2;KIF2C;TACC1;KIF20A;SPC25
regulation of mitotic cell cycle (GO:0007346)	53/391	8.18282e-12	1.59156e-09	-2.42045	49.0348	TOP2A;CDKN1B;DDX3X;BUB1B;CDC20;NUSAP1;FBXO5;GTSE1;TIPIN;RPS6;TERF1;CDC25C;SMC1A;CDC25B;CIT;DDB1;PSRC1;PSMA1;BIRC5;GAS1;ANAPC1;MAD1L1;PSMD11;TTK;AURKB;AURKA;CCNB1;PSMB2;PDPN;BUB3;BRD7;BUB1;RANBP1;UBE2C;NEK6;PLK1;KLHL22;RPA2;CDC7;FOXN3;CDC6;PBX1;TPX2;CENPE;ANLN;PSMC5;CENPF;PSMC1;RFWD3;CDK2;CDK1;MAD2L1;CUL4B
negative regulation of cell cycle (GO:0045786)	55/430	2.46195e-11	4.53646e-09	-2.43381	46.7561	TOP2A;CDKN1B;GMNN;CCNF;BUB1B;CDC20;SESN1;GPER1;FBXO5;GTSE1;PRKACB;GAS2L3;TIPIN;H2AFY;RPS6;TERF1;SMC1A;RNF167;DDX39B;PSMA1;GAS1;MAD1L1;ANAPC1;NOTCH2;PRKAA1;PSMD11;HDAC1;CUL1;TTK;AURKB;AURKA;TBRG1;CCNB1;PSMB2;BUB3;BRD7;BUB1;NPM1;UBE2C;PLK1;KLHL22;RPA2;FOXN3;PSMC5;CENPF;CDK6;STAG2;PSMC1;RFWD3;CDK2;CDK1;PDCD4;EIF4G2;MAD2L1;CDKN3
negative regulation of cell cycle process (GO:0010948)	40/254	6.32177e-11	1.10663e-08	-2.34995	43.0496	TOP2A;PSMD11;CDKN1B;CCNF;BUB1B;TTK;AURKB;AURKA;CDC20;CCNB1;PSMB2;GPER1;BUB3;FBXO5;BRD7;GTSE1;BUB1;TIPIN;NPM1;H2AFY;UBE2C;PLK1;RPS6;KLHL22;RPA2;FOXN3;TERF1;SMC1A;CENPF;PSMC5;STAG2;DDX39B;PSMA1;RFWD3;PSMC1;CDK2;CDK1;ANAPC1;MAD1L1;MAD2L1
DNA strand elongation involved in DNA replication (GO:0006271)	16/33	8.29323e-11	1.3826e-08	-2.38377	43.1385	PRIM2;GINS2;RFC3;RFC4;PCNA;LIG1;MCM7;PRIM1;RPA1;RPA2;POLD3;CDC45;MCM3;MCM4;MCM5;MCM2
spindle checkpoint (GO:0031577)	17/41	1.47008e-10	2.33943e-08	-2.20804	38.7969	UBE2C;PLK1;KLHL22;BUB1B;CASC5;TTK;TERF1;AURKB;CDC20;CENPF;CCNB1;BIRC5;BUB3;BUB1;MAD1L1;ANAPC1;MAD2L1
DNA strand elongation (GO:0022616)	16/35	1.64173e-10	2.49899e-08	-2.31789	40.5742	PRIM2;GINS2;RFC3;RFC4;PCNA;LIG1;MCM7;PRIM1;RPA1;RPA2;POLD3;CDC45;MCM3;MCM4;MCM5;MCM2
negative regulation of cell cycle phase transition (GO:1901988)	34/200	3.01925e-10	4.23455e-08	-2.26468	38.4484	TOP2A;PSMD11;CDKN1B;BUB1B;TTK;AURKB;CDC20;CCNB1;PSMB2;BUB3;FBXO5;BRD7;GTSE1;BUB1;TIPIN;H2AFY;UBE2C;PLK1;RPS6;KLHL22;RPA2;FOXN3;TERF1;SMC1A;CENPF;PSMC5;PSMA1;RFWD3;PSMC1;CDK2;CDK1;ANAPC1;MAD1L1;MAD2L1
DNA conformation change (GO:0071103)	24/99	3.02381e-10	4.23455e-08	-2.16331	36.7274	TOP2A;XRCC6;RTEL1;DDX3X;MCM7;DDX1;CDCA5;HMGB2;NCAPG;HMGB1;SMC4;NCAPH;SMC2;RAD54B;RAD51;GPER1;HAT1;NUSAP1;CDK1;MCM3;MCM4;NCAPD2;MCM5;MCM2
regulation of mitotic metaphase/anaphase transition (GO:0030071)	17/44	3.5464e-10	4.77536e-08	-2.25873	38.0759	UBE2C;NEK6;PLK1;KLHL22;BUB1B;TTK;CDC6;TERF1;CDC20;CENPE;CENPF;FBXO5;BUB3;BUB1;MAD1L1;ANAPC1;MAD2L1
negative regulation of mitotic cell cycle phase transition (GO:1901991)	33/192	4.31435e-10	5.59428e-08	-2.26616	37.8425	TOP2A;CDKN1B;PSMD11;BUB1B;TTK;AURKB;CDC20;CCNB1;PSMB2;FBXO5;BUB3;BRD7;GTSE1;BUB1;TIPIN;UBE2C;RPS6;PLK1;KLHL22;RPA2;FOXN3;TERF1;SMC1A;PSMC5;CENPF;PSMA1;PSMC1;RFWD3;CDK2;CDK1;ANAPC1;MAD1L1;MAD2L1
regulation of metaphase/anaphase transition of cell cycle (GO:1902099)	17/45	4.69603e-10	5.87171e-08	-2.20158	36.6575	UBE2C;NEK6;PLK1;KLHL22;BUB1B;TTK;CDC6;TERF1;CDC20;CENPE;CENPF;FBXO5;BUB3;BUB1;MAD1L1;ANAPC1;MAD2L1
mitotic cell cycle checkpoint (GO:0007093)	24/103	6.02339e-10	7.27169e-08	-2.13341	35.0662	TOP2A;TIPIN;UBE2C;PLK1;RPS6;BUB1B;KLHL22;RPA2;TTK;FOXN3;TERF1;SMC1A;AURKB;CDC20;CENPF;CCNB1;RFWD3;CDK2;CDK1;BUB3;BUB1;ANAPC1;MAD1L1;MAD2L1
anaphase-promoting complex-dependent proteasomal ubiquitin-dependent protein catabolic process (GO:0031145)	21/82	1.69246e-09	1.9751e-07	-2.12223	32.7618	PSMD11;UBE2C;PLK1;CUL1;BUB1B;AURKB;CIT;AURKA;CDC20;PSMC5;CCNB1;PSMA1;PSMB2;PSMC1;CDK2;CDK1;FBXO5;BUB3;SKP2;ANAPC1;MAD2L1
cell division (GO:0051301)	26/131	2.29019e-09	2.58644e-07	-2.11525	32.0837	TOP2A;SKA1;CKS1B;SKA2;PPP1CB;CCNB2;TUBA1B;DSN1;CCNB1;CCND2;CNTRL;LIG1;SPAG5;KLHL22;CDC7;POU3F2;ETV5;CDK6;CCNE2;KIT;CINP;BIRC5;TACC1;MCM5;FGFR1;ARL8B
negative regulation of mitotic cell cycle (GO:0045930)	34/219	2.4453e-09	2.67531e-07	-2.27215	34.3868	TOP2A;CDKN1B;PSMD11;BUB1B;TTK;AURKB;CDC20;CCNB1;PSMB2;FBXO5;BUB3;BRD7;GTSE1;BUB1;TIPIN;UBE2C;RPS6;PLK1;KLHL22;RPA2;FOXN3;TERF1;SMC1A;PSMC5;CENPF;PSMA1;PSMC1;RFWD3;CDK2;CDK1;GAS1;ANAPC1;MAD1L1;MAD2L1
regulation of mitosis (GO:0007088)	24/112	2.56038e-09	2.71633e-07	-2.17479	32.8803	RANBP1;UBE2C;NEK6;PLK1;BUB1B;KLHL22;TTK;CDC6;TERF1;CDC25C;CIT;AURKA;CDC20;CENPE;ANLN;CENPF;NUSAP1;BIRC5;BUB3;FBXO5;BUB1;ANAPC1;MAD1L1;MAD2L1
protein-DNA complex assembly (GO:0065004)	24/113	2.98254e-09	3.07114e-07	-2.11375	31.698	NPM1;SET;H2AFY;HMGB2;RPA1;CASC5;RPA2;NAP1L1;CENPA;PIAS1;H1F0;CHAF1B;RAD51;NASP;CENPI;MIS18BP1;CENPK;HAT1;UBN1;CENPN;SMYD3;CENPQ;ASF1B;MCM2
protein-DNA complex subunit organization (GO:0071824)	26/136	4.55097e-09	4.55227e-07	-2.12252	30.994	SET;HMGB2;CASC5;CENPA;CHAF1B;MIS18BP1;UBN1;SMYD3;NPM1;H2AFY;RPA1;RPA2;NAP1L1;ARID1A;PIAS1;H1F0;RAD51;NASP;CENPI;CENPK;HAT1;ANP32E;CENPN;CENPQ;ASF1B;MCM2
spindle assembly checkpoint (GO:0071173)	14/33	4.95397e-09	4.81774e-07	-2.25331	32.7762	UBE2C;PLK1;KLHL22;BUB1B;CASC5;TTK;TERF1;CDC20;CENPF;BUB3;BUB1;MAD1L1;ANAPC1;MAD2L1
negative regulation of mitotic metaphase/anaphase transition (GO:0045841)	14/34	6.72395e-09	5.88514e-07	-2.32541	33.3596	UBE2C;PLK1;KLHL22;BUB1B;TTK;TERF1;CDC20;CENPF;FBXO5;BUB3;BUB1;MAD1L1;ANAPC1;MAD2L1
negative regulation of mitotic sister chromatid segregation (GO:0033048)	14/34	6.72395e-09	5.88514e-07	-2.3219	33.3093	UBE2C;PLK1;KLHL22;BUB1B;TTK;TERF1;CDC20;CENPF;FBXO5;BUB3;BUB1;MAD1L1;ANAPC1;MAD2L1
negative regulation of sister chromatid segregation (GO:0033046)	14/34	6.72395e-09	5.88514e-07	-2.31423	33.1991	UBE2C;PLK1;KLHL22;BUB1B;TTK;TERF1;CDC20;CENPF;FBXO5;BUB3;BUB1;MAD1L1;ANAPC1;MAD2L1
negative regulation of mitotic sister chromatid separation (GO:2000816)	14/34	6.72395e-09	5.88514e-07	-2.31033	33.1432	UBE2C;PLK1;KLHL22;BUB1B;TTK;TERF1;CDC20;CENPF;FBXO5;BUB3;BUB1;MAD1L1;ANAPC1;MAD2L1
negative regulation of metaphase/anaphase transition of cell cycle (GO:1902100)	14/35	9.05032e-09	7.37559e-07	-2.27688	32.1494	UBE2C;PLK1;KLHL22;BUB1B;TTK;TERF1;CDC20;CENPF;FBXO5;BUB3;BUB1;MAD1L1;ANAPC1;MAD2L1
regulation of mitotic sister chromatid separation (GO:0010965)	15/42	9.26952e-09	7.37559e-07	-2.22008	31.3474	UBE2C;PLK1;KLHL22;BUB1B;TTK;TERF1;CIT;CDC20;CENPF;FBXO5;BUB3;BUB1;MAD1L1;ANAPC1;MAD2L1
regulation of mitotic sister chromatid segregation (GO:0033047)	15/42	9.26952e-09	7.37559e-07	-2.21733	31.3085	UBE2C;PLK1;KLHL22;BUB1B;TTK;TERF1;CIT;CDC20;CENPF;FBXO5;BUB3;BUB1;MAD1L1;ANAPC1;MAD2L1
regulation of sister chromatid segregation (GO:0033045)	15/42	9.26952e-09	7.37559e-07	-2.21178	31.2302	UBE2C;PLK1;KLHL22;BUB1B;TTK;TERF1;CIT;CDC20;CENPF;FBXO5;BUB3;BUB1;MAD1L1;ANAPC1;MAD2L1
sister chromatid segregation (GO:0000819)	2016-12-23	1.0438e-08	8.12074e-07	-2.33908	32.8025	TOP2A;SPAG5;PLK1;NUSAP1;KLHL22;BUB3;SMC1A;SMC4;KNSTRN;NDC80;MAD2L1;CIT
DNA repair (GO:0006281)	47/403	1.07054e-08	8.14777e-07	-2.35003	32.9482	DCLRE1A;BTG2;RTEL1;PCNA;UHRF1;USP10;CDCA5;DDX1;BRCC3;FOXM1;RAD54B;RDM1;POLD3;CHAF1B;EME1;POLR2B;RBBP8;RAD54L;RFC3;XRCC6;NPM1;RFC4;LIG1;XRCC2;NONO;ACTL6A;RPA1;RPA2;RAD23A;KIF22;SSRP1;ESCO2;SMC1A;GTF2H3;SPIDR;DDB1;MORF4L1;RAD51;TTC5;UBE2T;RFWD3;CDK2;CINP;CDK1;DTL;RAD18;CUL4B
negative regulation of chromosome segregation (GO:0051985)	14/36	1.2085e-08	8.81447e-07	-2.30428	32.1256	UBE2C;PLK1;KLHL22;BUB1B;TTK;TERF1;CDC20;CENPF;FBXO5;BUB3;BUB1;MAD1L1;ANAPC1;MAD2L1
mitotic spindle checkpoint (GO:0071174)	14/36	1.2085e-08	8.81447e-07	-2.17659	30.3454	UBE2C;PLK1;KLHL22;BUB1B;TTK;TERF1;CDC20;CENPF;CCNB1;BUB3;BUB1;MAD1L1;ANAPC1;MAD2L1
regulation of microtubule-based process (GO:0032886)	24/124	1.45168e-08	1.03721e-06	-2.14819	29.5999	BBS2;RANBP1;NPM1;CDKN1B;SPAG5;CEP120;CCNF;CKAP2;TERF1;SKA3;KNSTRN;SKA1;AURKB;SKA2;AURKA;TPX2;CCNB1;PSRC1;XPO1;CHORDC1;TACC3;TACC1;ECT2;EPHA3
mitotic spindle assembly checkpoint (GO:0007094)	13/32	2.66113e-08	1.86333e-06	-2.21849	29.2689	UBE2C;PLK1;KLHL22;BUB1B;TTK;TERF1;CDC20;CENPF;BUB3;BUB1;MAD1L1;ANAPC1;MAD2L1
mitotic sister chromatid segregation (GO:0000070)	2016-11-20	2.86752e-08	1.96847e-06	-2.30549	30.2901	SPAG5;PLK1;NUSAP1;KLHL22;BUB3;SMC1A;SMC4;KNSTRN;NDC80;MAD2L1;CIT
spindle organization (GO:0007051)	18/74	4.8537e-08	3.26785e-06	-2.00941	25.3817	RANBP1;SPAG5;NEK6;CEP120;TTK;KIF11;SMC1A;TUBG1;EML1;KNSTRN;CKAP5;NDC80;HAUS1;AURKA;TACC3;FLNA;FBXO5;SPC25
chromatin modification (GO:0016568)	50/475	7.19926e-08	4.75559e-06	-2.27537	27.8874	SMARCAL1;SUV39H1;CASC5;ACTB;ING5;HMGN5;MIS18BP1;HMG20A;HMGN3;HELLS;PBRM1;H2AFY;ACTL6A;VRK1;ARID1A;TERF1;DDB1;MORF4L1;HAT1;ASF1B;PRKAA1;DNMT1;HDAC1;UHRF1;SATB2;BRCC3;CENPA;HDAC9;PPM1F;AURKB;AURKA;UBN1;SMYD3;BRD8;NPM1;DEK;SMARCA2;MT3;NASP;CENPI;CENPK;CDK2;ANP32E;CDK1;TADA1;CENPN;HNRNPC;OGT;CENPQ;CUL4B
regulation of nuclear division (GO:0051783)	24/138	8.69109e-08	5.63472e-06	-2.15311	26.0238	RANBP1;UBE2C;NEK6;PLK1;BUB1B;KLHL22;TTK;CDC6;TERF1;CDC25C;CIT;AURKA;CDC20;CENPE;ANLN;CENPF;NUSAP1;BIRC5;BUB3;FBXO5;BUB1;ANAPC1;MAD1L1;MAD2L1
negative regulation of mitosis (GO:0045839)	14/44	9.543e-08	5.81267e-06	-2.13382	25.7242	UBE2C;PLK1;KLHL22;BUB1B;TTK;TERF1;CDC20;CENPF;FBXO5;BUB3;BUB1;ANAPC1;MAD1L1;MAD2L1
nucleosome assembly (GO:0006334)	20/97	9.45517e-08	5.81267e-06	-2.0547	24.7704	NPM1;SET;H2AFY;HMGB2;CASC5;NAP1L1;CENPA;H1F0;CHAF1B;NASP;CENPI;MIS18BP1;CENPK;UBN1;HAT1;CENPN;SMYD3;CENPQ;ASF1B;MCM2
G2/M transition of mitotic cell cycle (GO:0000086)	24/139	9.79274e-08	5.81267e-06	-2.03732	24.5609	HSP90AA1;TUBGCP2;NDE1;PLK1;CUL1;TERF1;CDC25C;FOXM1;TUBG1;CKAP5;CDC25B;CIT;AURKA;PPP1CB;NEDD1;CCNB2;CENPF;CCNB1;MELK;CDK2;CNTRL;CDK1;BIRC5;SKP2
cell cycle G2/M phase transition (GO:0044839)	24/139	9.79274e-08	5.81267e-06	-2.03483	24.5308	HSP90AA1;TUBGCP2;NDE1;PLK1;CUL1;TERF1;CDC25C;FOXM1;TUBG1;CKAP5;CDC25B;CIT;AURKA;PPP1CB;NEDD1;CCNB2;CENPF;CCNB1;MELK;CDK2;CNTRL;CDK1;BIRC5;SKP2
ATP-dependent chromatin remodeling (GO:0043044)	15/52	9.7957e-08	5.81267e-06	-1.84335	22.2224	NPM1;HDAC1;ACTL6A;CASC5;ARID1A;CENPA;ACTB;NASP;CENPI;MIS18BP1;CENPK;ANP32E;CENPN;HNRNPC;CENPQ
nucleoside monophosphate metabolic process (GO:0009123)	46/427	1.32789e-07	7.67928e-06	-2.24625	26.4541	TOP2A;PRPS2;SMARCAL1;ABCD2;RTEL1;DDX3X;ABCB7;DDX1;ADK;AK3;ATP1A2;KIF11;TYMS;PFAS;KIF15;RAD54B;DHX30;KATNA1;FIGNL1;DHX36;TK1;ABCF2;ABCF3;RFC3;HSP90AA1;XRCC2;ATAD2;KIF23;KIF22;GBAS;ATP5F1;GTF2H3;PAICS;SMARCA2;ACLY;CENPE;PSMC5;RAD51;DDX39B;PSMC1;KIF2C;KIF20A;SNRNP200;UMPS;ABCE1;GART
nucleosome organization (GO:0034728)	22/120	1.33801e-07	7.67928e-06	-2.04936	24.1353	NPM1;SET;H2AFY;HMGB2;CASC5;NAP1L1;ARID1A;CENPA;H1F0;CHAF1B;NASP;CENPI;MIS18BP1;CENPK;HAT1;UBN1;ANP32E;CENPN;SMYD3;CENPQ;ASF1B;MCM2
mitotic recombination (GO:0006312)	2016-12-31	1.40437e-07	7.93018e-06	-2.12178	24.92	POLD3;TOP2A;PRIM2;RFC3;RFC4;PCNA;RAD51;LIG1;PRIM1;RPA1;RPA2;RAD54B
regulation of microtubule cytoskeleton organization (GO:0070507)	20/100	1.45745e-07	8.09924e-06	-2.12288	24.8881	RANBP1;NPM1;CDKN1B;SPAG5;CCNF;CKAP2;SKA3;TERF1;KNSTRN;SKA1;AURKB;SKA2;AURKA;TPX2;CCNB1;PSRC1;XPO1;CHORDC1;ECT2;EPHA3
microtubule-based process (GO:0007017)	46/437	2.4449e-07	1.29691e-05	-2.2701	25.5453	CD63;GPSM2;TUBGCP2;CEP120;CASC5;TTK;KIF11;CENPA;AURKB;KIF15;AURKA;TUBA1B;SGOL1;KATNA1;NUSAP1;FLNA;BUB3;FBXO5;GTSE1;BBS2;RANBP1;GAS2L3;SPAG5;NDE1;NEK6;PLK1;KIF23;KIF22;TUBG1;SMC1A;KNSTRN;EML1;CKAP5;NDC80;HAUS1;CENPE;PSRC1;PRC1;CDK1;TACC3;SPRY2;BIRC5;KIF2C;TACC1;KIF20A;SPC25
DNA replication-independent nucleosome assembly (GO:0006336)	1933-12-01	2.4358e-07	1.29691e-05	-2.21428	24.9171	NPM1;NASP;CENPI;MIS18BP1;UBN1;CENPK;HAT1;CASC5;CENPN;CENPA;CENPQ;ASF1B
DNA replication-independent nucleosome organization (GO:0034724)	1933-12-01	2.4358e-07	1.29691e-05	-2.20922	24.8602	NPM1;NASP;CENPI;MIS18BP1;UBN1;CENPK;HAT1;CASC5;CENPN;CENPA;CENPQ;ASF1B
regulation of proteasomal ubiquitin-dependent protein catabolic process (GO:0032434)	21/116	3.09664e-07	1.61811e-05	-2.12407	23.4321	UBE2C;RNF180;NEK6;PLK1;BUB1B;KLHL22;RAD23A;TTK;CDC6;TERF1;PIAS1;AURKA;CDC20;CENPE;CENPF;BUB3;FBXO5;BUB1;ANAPC1;MAD1L1;MAD2L1
ribonucleoside monophosphate metabolic process (GO:0009161)	44/416	3.98595e-07	2.05218e-05	-2.22964	24.0668	TOP2A;PRPS2;SMARCAL1;ABCD2;RTEL1;DDX3X;ABCB7;DDX1;ADK;AK3;ATP1A2;KIF11;PFAS;KIF15;RAD54B;DHX30;KATNA1;FIGNL1;DHX36;ABCF2;ABCF3;RFC3;HSP90AA1;XRCC2;ATAD2;KIF23;KIF22;ATP5F1;GBAS;GTF2H3;PAICS;SMARCA2;ACLY;CENPE;PSMC5;RAD51;DDX39B;PSMC1;KIF2C;KIF20A;SNRNP200;UMPS;ABCE1;GART
purine ribonucleoside monophosphate metabolic process (GO:0009167)	43/402	4.10713e-07	2.08392e-05	-2.23086	24.0457	TOP2A;PRPS2;SMARCAL1;ABCD2;RTEL1;DDX3X;ABCB7;DDX1;ADK;AK3;ATP1A2;KIF11;PFAS;KIF15;RAD54B;DHX30;KATNA1;FIGNL1;DHX36;ABCF2;ABCF3;RFC3;HSP90AA1;XRCC2;ATAD2;KIF23;KIF22;ATP5F1;GBAS;GTF2H3;PAICS;SMARCA2;ACLY;CENPE;PSMC5;RAD51;DDX39B;PSMC1;KIF2C;KIF20A;SNRNP200;ABCE1;GART
purine nucleoside monophosphate metabolic process (GO:0009126)	43/403	4.36685e-07	2.17186e-05	-2.23236	23.9696	TOP2A;PRPS2;SMARCAL1;ABCD2;RTEL1;DDX3X;ABCB7;DDX1;ADK;AK3;ATP1A2;KIF11;PFAS;KIF15;RAD54B;DHX30;KATNA1;FIGNL1;DHX36;ABCF2;ABCF3;RFC3;HSP90AA1;XRCC2;ATAD2;KIF23;KIF22;ATP5F1;GBAS;GTF2H3;PAICS;SMARCA2;ACLY;CENPE;PSMC5;RAD51;DDX39B;PSMC1;KIF2C;KIF20A;SNRNP200;ABCE1;GART
regulation of ubiquitin-protein ligase activity involved in mitotic cell cycle (GO:0051439)	17/78	4.40452e-07	2.17186e-05	-1.95431	20.9841	PSMD11;UBE2C;PLK1;CUL1;BUB1B;CDC20;PSMC5;CCNB1;PSMA1;PSMB2;PSMC1;CDK2;CDK1;BUB3;FBXO5;ANAPC1;MAD2L1
negative regulation of proteasomal ubiquitin-dependent protein catabolic process (GO:0032435)	14/52	5.32015e-07	2.58692e-05	-2.07663	21.9343	UBE2C;PLK1;BUB1B;KLHL22;TTK;TERF1;CDC20;CENPF;FBXO5;BUB3;BUB1;MAD1L1;ANAPC1;MAD2L1
negative regulation of chromosome organization (GO:2001251)	17/80	5.99617e-07	2.8757e-05	-2.02484	21.173	DNMT1;SET;H2AFY;UBE2C;PLK1;BUB1B;KLHL22;TTK;TERF1;CDC20;CENPF;FBXO5;BUB3;BUB1;ANAPC1;MAD1L1;MAD2L1
mitotic nuclear envelope disassembly (GO:0007077)	1937-12-01	6.68718e-07	3.16376e-05	-2.15371	22.315	NUP93;CCNB2;CCNB1;NUP107;NUP133;NUP188;NUP85;NEK6;PLK1;CDK1;VRK1;NUP37
RNA splicing (GO:0008380)	36/313	7.89816e-07	3.63835e-05	-2.15644	22.0418	ZCCHC8;RBM28;SF3B3;DDX1;HNRNPU;CCAR1;EFTUD2;PTBP1;POLR2B;RSRC1;HNRNPA1;SF3B1;SF3A3;RBFOX1;ZRANB2;CPSF1;NONO;CPSF3;SREK1IP1;SMC1A;CDC40;HNRNPL;LSM8;SNW1;HNRNPK;PRPF18;LSM6;DDX39B;HNRNPH1;HNRNPF;MPHOSPH10;DNAJC8;HNRNPC;SNRNP200;TARDBP;SLU7
negative regulation of nuclear division (GO:0051784)	14/54	7.83002e-07	3.63835e-05	-1.95186	19.9507	UBE2C;PLK1;KLHL22;BUB1B;TTK;TERF1;CDC20;CENPF;FBXO5;BUB3;BUB1;ANAPC1;MAD1L1;MAD2L1
regulation of cell division (GO:0051302)	30/234	8.92594e-07	4.0584e-05	-2.19872	22.2338	BUB1B;TTK;PTN;AURKB;AURKA;CDC20;MDK;NUSAP1;BUB3;FBXO5;ECT2;BUB1;RANBP1;UBE2C;NEK6;PLK1;KLHL22;KIF23;CDC6;TERF1;CDC25C;CDC25B;CIT;CENPE;ANLN;CENPF;BIRC5;ANAPC1;MAD1L1;MAD2L1
DNA replication initiation (GO:0006270)	2016-10-24	9.16422e-07	4.11333e-05	-1.93162	19.5069	PRIM2;ORC4;CDC45;CCNE2;MCM7;PRIM1;MCM3;MCM4;MCM5;MCM2
RNA splicing, via transesterification reactions (GO:0000375)	26/184	9.43639e-07	4.1335e-05	-2.03772	20.5683	ZCCHC8;SF3B3;HNRNPU;CCAR1;EFTUD2;PTBP1;POLR2B;RSRC1;HNRNPA1;SF3B1;SF3A3;CPSF1;CPSF3;SMC1A;CDC40;HNRNPL;SNW1;HNRNPK;DDX39B;HNRNPH1;HNRNPF;MPHOSPH10;DNAJC8;HNRNPC;SNRNP200;SLU7
negative regulation of proteasomal protein catabolic process (GO:1901799)	14/55	9.44531e-07	4.1335e-05	-2.01363	20.3251	UBE2C;PLK1;BUB1B;KLHL22;TTK;TERF1;CDC20;CENPF;FBXO5;BUB3;BUB1;ANAPC1;MAD1L1;MAD2L1
regulation of chromosome organization (GO:0033044)	25/172	9.61275e-07	4.15484e-05	-2.18129	22.0063	DNMT1;SET;CDCA5;BUB1B;TTK;CDC20;CCNB1;DHX36;FBXO5;BUB3;BRD7;BUB1;H2AFY;UBE2C;PLK1;KLHL22;TERF1;CIT;CENPF;SNW1;LPIN1;OGT;ANAPC1;MAD1L1;MAD2L1
membrane disassembly (GO:0030397)	1939-12-01	1.06448e-06	4.49006e-05	-2.13025	21.3261	NUP93;CCNB2;CCNB1;NUP107;NUP133;NUP188;NUP85;NEK6;PLK1;CDK1;VRK1;NUP37
nuclear envelope disassembly (GO:0051081)	1939-12-01	1.06448e-06	4.49006e-05	-2.12651	21.2886	NUP93;CCNB2;CCNB1;NUP107;NUP133;NUP188;NUP85;NEK6;PLK1;CDK1;VRK1;NUP37
proteasomal protein catabolic process (GO:0010498)	28/212	1.21823e-06	5.07741e-05	-2.07745	20.5421	PSMD11;CCNF;CUL1;BUB1B;TNFAIP1;AURKB;AURKA;PCNP;CDC20;CCNB1;PSMB2;ENC1;FBXO5;BUB3;SKP2;UBE2C;PLK1;RAD23A;CIT;DDB1;PSMC5;PSMA1;PSMC1;CDK2;CDK1;ANAPC1;NFE2L2;MAD2L1
negative regulation of cell division (GO:0051782)	15/66	1.32961e-06	5.47642e-05	-1.91513	18.7922	UBE2C;PLK1;KLHL22;BUB1B;TTK;TERF1;AURKB;CDC20;CENPF;FBXO5;BUB3;BUB1;MAD1L1;ANAPC1;MAD2L1
mRNA splicing, via spliceosome (GO:0000398)	25/177	1.53511e-06	6.17749e-05	-2.01054	19.4862	ZCCHC8;SF3B3;HNRNPU;CCAR1;EFTUD2;PTBP1;POLR2B;RSRC1;HNRNPA1;SF3B1;SF3A3;CPSF1;CPSF3;SMC1A;CDC40;HNRNPL;HNRNPK;SNW1;DDX39B;HNRNPH1;HNRNPF;DNAJC8;HNRNPC;SNRNP200;SLU7
RNA splicing, via transesterification reactions with bulged adenosine as nucleophile (GO:0000377)	25/177	1.53511e-06	6.17749e-05	-2.00813	19.4628	ZCCHC8;SF3B3;HNRNPU;CCAR1;EFTUD2;PTBP1;POLR2B;RSRC1;HNRNPA1;SF3B1;SF3A3;CPSF1;CPSF3;SMC1A;CDC40;HNRNPL;HNRNPK;SNW1;DDX39B;HNRNPH1;HNRNPF;DNAJC8;HNRNPC;SNRNP200;SLU7
chromatin assembly or disassembly (GO:0006333)	14/58	1.62306e-06	6.45718e-05	-1.93035	18.6235	HELLS;NPM1;CASC5;CENPA;CHAF1B;NASP;CENPI;MIS18BP1;CENPK;UBN1;HAT1;CENPN;CENPQ;ASF1B
proteasome-mediated ubiquitin-dependent protein catabolic process (GO:0043161)	27/205	1.9774e-06	7.77851e-05	-2.06828	19.5692	PSMD11;CCNF;CUL1;BUB1B;TNFAIP1;AURKB;AURKA;CDC20;PCNP;CCNB1;PSMB2;BUB3;FBXO5;SKP2;UBE2C;PLK1;RAD23A;CIT;DDB1;PSMC5;PSMA1;PSMC1;CDK2;CDK1;ANAPC1;NFE2L2;MAD2L1
DNA recombination (GO:0006310)	26/196	2.71395e-06	0.000104022	-2.08854	19.1538	TOP2A;PRIM2;PCNA;PRIM1;HMGB2;HMGB3;HMGB1;RAD54B;RDM1;POLD3;PSMC3IP;EME1;RBBP8;RAD54L;XRCC6;RFC3;RFC4;LIG1;XRCC2;NONO;ACTL6A;RPA1;RPA2;SPIDR;MORF4L1;RAD51
regulation of proteasomal protein catabolic process (GO:0061136)	21/135	2.7335e-06	0.000104022	-2.08065	19.0814	UBE2C;RNF180;NEK6;PLK1;BUB1B;KLHL22;TTK;RAD23A;CDC6;TERF1;PIAS1;AURKA;CDC20;CENPE;CENPF;BUB3;FBXO5;BUB1;ANAPC1;MAD1L1;MAD2L1
negative regulation of proteolysis involved in cellular protein catabolic process (GO:1903051)	14/61	2.70747e-06	0.000104022	-1.94626	17.849	UBE2C;PLK1;KLHL22;BUB1B;TTK;TERF1;CDC20;CENPF;FBXO5;BUB3;BUB1;MAD1L1;ANAPC1;MAD2L1
positive regulation of cell cycle (GO:0045787)	32/278	3.19188e-06	0.000114028	-2.26701	20.5823	CDKN1B;PSMD11;DDX3X;AURKB;AURKA;CCNB1;CCND2;PSMB2;NUSAP1;ECT2;GTSE1;MED1;RANBP1;UBE2C;PLK1;KIF23;CDC7;CDC6;TERF1;PBX1;CDC25B;PSMC5;PSRC1;MYBBP1A;PSMA1;PSMC1;CDK2;CDK1;BIRC5;FGFR1;MAD2L1;CUL4B
negative regulation of organelle organization (GO:0010639)	29/237	3.14043e-06	0.000114028	-2.19501	19.9286	DNMT1;SET;INSIG1;CCNF;BUB1B;TWF1;TTK;AURKB;AURKA;CDC20;LIMA1;CCNB1;S1PR1;BUB3;FBXO5;BUB1;NPM1;H2AFY;UBE2C;PLK1;CKAP2;KLHL22;TERF1;CENPF;CAPZA2;SLC25A5;ANAPC1;MAD1L1;MAD2L1
regulation of proteolysis involved in cellular protein catabolic process (GO:1903050)	22/148	3.09079e-06	0.000114028	-2.08407	18.9214	UBE2C;RNF180;NEK6;PLK1;BUB1B;KLHL22;TTK;RAD23A;CDC6;TERF1;PIAS1;AURKA;CDC20;CENPE;CENPF;BUB3;FBXO5;BUB1;ANAPC1;MAD1L1;TRIM67;MAD2L1
DNA packaging (GO:0006323)	1936-11-01	3.17393e-06	0.000114028	-1.98973	18.0649	TOP2A;GPER1;CDCA5;HAT1;NUSAP1;CDK1;NCAPG;NCAPD2;SMC4;NCAPH;SMC2
telomere maintenance via telomere lengthening (GO:0010833)	1936-11-01	3.17393e-06	0.000114028	-1.89993	17.2496	POLD3;PRIM2;RFC3;RFC4;PCNA;LIG1;DKC1;PRIM1;RPA1;RPA2;TERF1
telomere maintenance (GO:0000723)	14/62	3.19134e-06	0.000114028	-1.7373	15.7731	PRIM2;RFC3;XRCC6;RTEL1;RFC4;PCNA;LIG1;PRIM1;PTGES3;RPA1;RPA2;TERF1;POLD3;DKC1
chromosome condensation (GO:0030261)	2016-10-29	3.66643e-06	0.000128362	-1.87636	16.8134	TOP2A;GPER1;CDCA5;NUSAP1;CDK1;NCAPG;NCAPD2;SMC4;NCAPH;SMC2
telomere maintenance via semi-conservative replication (GO:0032201)	2016-09-22	3.66512e-06	0.000128362	-1.80408	16.1658	POLD3;PRIM2;RFC3;RFC4;PCNA;LIG1;PRIM1;RPA1;RPA2
telomere organization (GO:0032200)	14/63	3.75072e-06	0.000130013	-1.73618	15.5351	PRIM2;XRCC6;RTEL1;RFC3;RFC4;PCNA;LIG1;PRIM1;PTGES3;RPA1;RPA2;TERF1;POLD3;DKC1
mRNA processing (GO:0006397)	40/397	4.04433e-06	0.000138816	-2.13723	18.9836	ZCCHC8;SLBP;RBM28;SF3B3;HNRNPU;CCAR1;EFTUD2;PTBP1;ALKBH5;POLR2B;RSRC1;HNRNPA1;SF3B1;PAIP1;SF3A3;RBFOX1;ZRANB2;CPSF1;NONO;CPSF3;SREK1IP1;GTF2H3;SMC1A;CDC40;PAN2;HNRNPL;LSM8;SNW1;HNRNPK;PRPF18;LSM6;DDX39B;HNRNPH1;HNRNPF;XRN2;HNRNPC;DNAJC8;SNRNP200;TARDBP;SLU7
negative regulation of cellular protein catabolic process (GO:1903363)	14/64	4.39566e-06	0.00014941	-1.90594	16.789	UBE2C;PLK1;BUB1B;KLHL22;TTK;TERF1;CDC20;CENPF;FBXO5;BUB3;BUB1;ANAPC1;MAD1L1;MAD2L1
chromatin remodeling (GO:0006338)	19/118	5.20488e-06	0.000175214	-1.91397	16.5549	HELLS;NPM1;PBRM1;HDAC1;SATB2;ACTL6A;CASC5;ARID1A;CENPA;SMARCA2;ACTB;NASP;CENPI;MIS18BP1;CENPK;ANP32E;CENPN;HNRNPC;CENPQ
regulation of cellular protein catabolic process (GO:1903362)	22/155	6.0274e-06	0.000199075	-2.06565	17.6032	UBE2C;RNF180;NEK6;PLK1;BUB1B;KLHL22;TTK;RAD23A;CDC6;TERF1;PIAS1;AURKA;CDC20;CENPE;CENPF;BUB3;FBXO5;BUB1;ANAPC1;MAD1L1;MAD2L1;TRIM67
histone exchange (GO:0043486)	2016-10-31	5.9878e-06	0.000199075	-1.8418	15.6955	NPM1;NASP;CENPI;MIS18BP1;CENPK;ANP32E;CASC5;CENPN;CENPA;CENPQ
regulation of protein catabolic process (GO:0042176)	30/260	6.19153e-06	0.000202585	-2.20649	18.7648	CDKN1B;RNF180;BUB1B;TTK;AURKA;CDC20;GJA1;XPO1;FLNA;TIMP3;FBXO5;BUB3;BUB1;TRIM67;UBE2C;NEK6;PLK1;KLHL22;RAD23A;CDC6;TERF1;SORL1;PIAS1;CENPE;CENPF;NEDD4;ANAPC1;MAD1L1;MAD2L1;CUL4B
positive regulation of cell cycle process (GO:0090068)	27/220	6.5104e-06	0.000211045	-2.17003	18.3659	CDKN1B;PSMD11;DDX3X;AURKB;AURKA;PSMB2;NUSAP1;ECT2;GTSE1;MED1;RANBP1;UBE2C;PLK1;KIF23;CDC7;CDC6;TERF1;PBX1;CDC25B;PSMC5;MYBBP1A;PSMA1;PSMC1;CDK2;BIRC5;MAD2L1;CUL4B
chromatin remodeling at centromere (GO:0031055)	2016-09-25	8.50662e-06	0.000273227	-1.76183	14.4562	HELLS;NPM1;CENPI;MIS18BP1;CENPK;CASC5;CENPN;CENPA;CENPQ
telomere maintenance via recombination (GO:0000722)	2016-09-26	1.10239e-05	0.00035086	-1.84188	14.6524	POLD3;PRIM2;RFC3;RFC4;PCNA;LIG1;PRIM1;RPA1;RPA2
mitotic chromosome condensation (GO:0007076)	2016-07-13	1.14426e-05	0.000360907	-1.03054	8.16901	CDCA5;NUSAP1;NCAPG;NCAPD2;SMC4;NCAPH;SMC2
ATP catabolic process (GO:0006200)	34/327	1.17565e-05	0.000367496	-2.07388	16.4019	TOP2A;SMARCAL1;ABCD2;RTEL1;DDX3X;ABCB7;DDX1;KIF11;KIF15;RAD54B;DHX30;KATNA1;DHX36;ABCF2;ABCF3;RFC3;HSP90AA1;XRCC2;ATAD2;KIF23;KIF22;ATP5F1;GTF2H3;SMARCA2;CENPE;ACLY;PSMC5;RAD51;DDX39B;PSMC1;KIF2C;KIF20A;SNRNP200;ABCE1
regulation of ubiquitin-protein transferase activity (GO:0051438)	17/103	1.21525e-05	0.000376513	-1.95118	15.3842	PSMD11;UBE2C;PLK1;CUL1;BUB1B;CDC20;PSMC5;CCNB1;PSMA1;PSMB2;PSMC1;CDK2;CDK1;BUB3;FBXO5;ANAPC1;MAD2L1
nuclear envelope organization (GO:0006998)	1952-12-01	1.32913e-05	0.000408181	-1.74809	13.6417	NUP93;CCNB2;CCNB1;NUP107;NUP133;NUP188;NUP85;NEK6;PLK1;CDK1;VRK1;NUP37
purine ribonucleoside monophosphate catabolic process (GO:0009169)	34/332	1.57134e-05	0.000474248	-2.06418	15.7988	TOP2A;SMARCAL1;ABCD2;RTEL1;DDX3X;ABCB7;DDX1;KIF11;KIF15;RAD54B;DHX30;KATNA1;DHX36;ABCF2;ABCF3;RFC3;HSP90AA1;XRCC2;ATAD2;KIF23;KIF22;ATP5F1;GTF2H3;SMARCA2;ACLY;CENPE;PSMC5;RAD51;DDX39B;PSMC1;KIF2C;KIF20A;SNRNP200;ABCE1
ribonucleoside monophosphate catabolic process (GO:0009158)	34/332	1.57134e-05	0.000474248	-2.06169	15.7797	TOP2A;SMARCAL1;ABCD2;RTEL1;DDX3X;ABCB7;DDX1;KIF11;KIF15;RAD54B;DHX30;KATNA1;DHX36;ABCF2;ABCF3;RFC3;HSP90AA1;XRCC2;ATAD2;KIF23;KIF22;ATP5F1;GTF2H3;SMARCA2;ACLY;CENPE;PSMC5;RAD51;DDX39B;PSMC1;KIF2C;KIF20A;SNRNP200;ABCE1
ATP metabolic process (GO:0046034)	37/377	1.58763e-05	0.000475069	-2.09867	16.0591	TOP2A;SMARCAL1;ABCD2;RTEL1;DDX3X;ABCB7;DDX1;ATP1A2;KIF11;KIF15;RAD54B;DHX30;KATNA1;FIGNL1;DHX36;ABCF2;ABCF3;RFC3;HSP90AA1;XRCC2;ATAD2;KIF23;KIF22;ATP5F1;GBAS;GTF2H3;SMARCA2;ACLY;CENPE;PSMC5;RAD51;DDX39B;PSMC1;KIF2C;KIF20A;ABCE1;SNRNP200
purine nucleoside monophosphate catabolic process (GO:0009128)	34/333	1.66381e-05	0.000493645	-2.06211	15.7003	TOP2A;SMARCAL1;ABCD2;RTEL1;DDX3X;ABCB7;DDX1;KIF11;KIF15;RAD54B;DHX30;KATNA1;DHX36;ABCF2;ABCF3;RFC3;HSP90AA1;XRCC2;ATAD2;KIF23;KIF22;ATP5F1;GTF2H3;SMARCA2;ACLY;CENPE;PSMC5;RAD51;DDX39B;PSMC1;KIF2C;KIF20A;SNRNP200;ABCE1
regulation of cytoskeleton organization (GO:0051493)	35/350	1.87529e-05	0.000547115	-2.19433	16.4813	SEMA5A;CYFIP1;CLIC4;CDKN1B;CCNF;TWF1;SKA3;SKA1;AURKB;PPM1F;SKA2;AURKA;LIMA1;CCNB1;XPO1;CHORDC1;S1PR1;ECT2;JAM3;RANBP1;MEF2C;NPM1;SPAG5;CKAP2;TERF1;KNSTRN;SORBS3;CIT;TPX2;SFRP1;CXCL12;PSRC1;CAPZA2;PAM;EPHA3
nucleoside monophosphate catabolic process (GO:0009125)	34/335	1.86385e-05	0.000547115	-2.07392	15.5769	TOP2A;SMARCAL1;ABCD2;RTEL1;DDX3X;ABCB7;DDX1;KIF11;KIF15;RAD54B;DHX30;KATNA1;DHX36;ABCF2;ABCF3;RFC3;HSP90AA1;XRCC2;ATAD2;KIF23;KIF22;ATP5F1;GTF2H3;SMARCA2;ACLY;CENPE;PSMC5;RAD51;DDX39B;PSMC1;KIF2C;KIF20A;SNRNP200;ABCE1
negative regulation of cellular component organization (GO:0051129)	43/474	1.95633e-05	0.000566042	-2.19358	16.401	SEMA5A;DNMT1;DDX3X;SET;INSIG1;CCNF;LPAR1;BUB1B;LRP4;TWF1;TTK;HMGB1;AURKB;AURKA;CDC20;LIMA1;CCNB1;KATNA1;S1PR1;BUB3;FBXO5;BUB1;EPHA4;NPM1;H2AFY;UBE2C;PLK1;CKAP2;KLHL22;TERF1;CBFA2T2;MT3;SORL1;CIT;SFRP1;CENPF;CAPZA2;VIM;SLC25A5;ANAPC1;MAD1L1;PICALM;MAD2L1
regulation of ligase activity (GO:0051340)	17/108	2.09955e-05	0.000602502	-1.92708	14.2882	PSMD11;UBE2C;PLK1;CUL1;BUB1B;CDC20;PSMC5;CCNB1;PSMA1;PSMB2;PSMC1;CDK2;CDK1;FBXO5;BUB3;ANAPC1;MAD2L1
DNA duplex unwinding (GO:0032508)	1955-12-01	2.16055e-05	0.000614966	-1.75672	12.9891	TOP2A;XRCC6;RTEL1;DDX3X;RAD51;MCM7;DDX1;MCM3;MCM4;MCM5;RAD54B;MCM2
negative regulation of protein catabolic process (GO:0042177)	16/97	2.19506e-05	0.00061975	-1.97469	14.5854	UBE2C;PLK1;BUB1B;KLHL22;TTK;TERF1;CDC20;CENPF;TIMP3;FLNA;FBXO5;BUB3;BUB1;MAD1L1;ANAPC1;MAD2L1
DNA integrity checkpoint (GO:0031570)	15/86	2.21513e-05	0.000620413	-1.797	13.271	TOP2A;TIPIN;NEK6;PLK1;RPA2;CDC6;BRCC3;FOXN3;CDC45;RFWD3;CDK2;RBBP8;CDK1;INTS7;DTL
protein catabolic process (GO:0030163)	29/269	2.8092e-05	0.000780556	-2.05757	14.723	PSMD11;CCNF;CUL1;BUB1B;TNFAIP1;AURKB;AURKA;PCNP;CDC20;CCNB1;PSMB2;ENC1;FBXO5;BUB3;SKP2;LDLR;UBE2C;PLK1;RAD23A;CIT;DDB1;PSMC5;PSMA1;PSMC1;CDK2;CDK1;ANAPC1;NFE2L2;MAD2L1
negative regulation of transferase activity (GO:0051348)	30/284	2.91266e-05	0.000802931	-2.11835	15.098	CDKN1B;PSMD11;BUB1B;GPS2;HMGCR;PPM1F;DUSP14;CDC20;DUSP10;PSMB2;CHORDC1;FBXO5;BUB3;SMYD3;NPM1;H2AFY;UBE2C;PLK1;TERF1;GBAS;SORL1;SFRP1;PSMC5;PSMA1;PRKAR1B;PSMC1;PDCD4;SPRY2;ANAPC1;MAD2L1
DNA geometric change (GO:0032392)	1957-12-01	2.9391e-05	0.000803889	-1.76359	12.5674	TOP2A;XRCC6;RTEL1;DDX3X;RAD51;MCM7;DDX1;MCM3;MCM4;MCM5;RAD54B;MCM2
CENP-A containing nucleosome assembly (GO:0034080)	2016-08-23	3.32913e-05	0.000903511	-1.60596	11.2565	NPM1;CENPI;MIS18BP1;CENPK;CASC5;CENPN;CENPA;CENPQ
cytokinesis (GO:0000910)	14/79	3.54288e-05	0.000954124	-1.75306	12.192	USP8;NEK6;PLK1;CKAP2;KIF23;KLHL13;CIT;ANLN;PRC1;NUSAP1;BIRC5;KIF20A;ECT2;CEP55
gene expression (GO:0010467)	54/672	4.09343e-05	0.00109398	-2.02065	13.7767	RPL4;RPL3;HNRNPU;CCAR1;FARS2;NARS;EFTUD2;PTBP1;XPO1;NELFA;MED1;WARS;RPS6;SMC1A;CDC40;LARS2;PSMA1;HNRNPH1;DNAJC8;SNRNP200;NOTCH2;SLBP;PSMD11;SET;SF3B3;ANP32A;HDAC1;TARS;PSMB2;POLR2B;EXOSC8;SSR1;HNRNPA1;SF3B1;PAIP1;SF3A3;CPSF1;CPSF3;SSRP1;EIF2S2;GTF2H3;EIF2S1;PAN2;HNRNPL;SPCS3;PSMC5;SNW1;LSM6;HNRNPK;PSMC1;AGO1;HNRNPF;HNRNPC;IARS
positive regulation of mitotic cell cycle (GO:0045931)	16/103	4.20859e-05	0.00111623	-1.90252	12.933	RANBP1;DDX3X;UBE2C;PLK1;CDC7;CDC6;TERF1;PBX1;CDC25B;AURKA;CCNB1;CDK1;NUSAP1;BIRC5;MAD2L1;CUL4B
establishment of chromosome localization (GO:0051303)	2016-08-24	4.27522e-05	0.00112538	-1.61412	10.9593	CENPE;CENPF;CCNB1;PSRC1;NDE1;CDCA5;BIRC5;CDCA8
modification-dependent macromolecule catabolic process (GO:0043632)	35/368	4.85804e-05	0.00126925	-2.1302	14.207	USP37;PSMD11;USP10;CCNF;CUL1;BUB1B;TNFAIP1;AURKB;AURKA;CDC20;PCNP;CCNB1;ZNRF3;EXOSC10;PSMB2;FBXO5;BUB3;SKP2;USP8;UBE2C;PLK1;RAD23A;CIT;DDB1;PSMC5;PSMA1;PSMC1;NEDD4;CDK2;CDK1;DTL;ANAPC1;NFE2L2;MAD2L1;CUL4B
ubiquitin-dependent protein catabolic process (GO:0006511)	34/355	5.47282e-05	0.00141929	-2.11823	13.8905	USP37;PSMD11;USP10;CCNF;CUL1;BUB1B;TNFAIP1;AURKB;AURKA;CDC20;PCNP;CCNB1;ZNRF3;PSMB2;FBXO5;BUB3;SKP2;USP8;UBE2C;PLK1;RAD23A;CIT;DDB1;PSMC5;PSMA1;PSMC1;NEDD4;CDK2;CDK1;DTL;ANAPC1;NFE2L2;MAD2L1;CUL4B
positive regulation of ubiquitin-protein ligase activity involved in mitotic cell cycle (GO:0051437)	13/72	5.65298e-05	0.00145523	-1.7542	11.4595	PSMD11;UBE2C;PLK1;CUL1;CDC20;PSMC5;CCNB1;PSMA1;PSMB2;PSMC1;CDK1;FBXO5;ANAPC1
regulation of transcription involved in G1/S transition of mitotic cell cycle (GO:0000083)	2016-08-26	6.84605e-05	0.00174949	-1.71526	10.8892	DHFR;PCNA;CDC45;RRM2;CDK1;FBXO5;CDC6;TYMS
proteolysis involved in cellular protein catabolic process (GO:0051603)	36/391	7.02888e-05	0.0017832	-2.12819	13.47	USP37;PSMD11;USP10;CCNF;CUL1;BUB1B;TNFAIP1;AURKB;AURKA;CDC20;PCNP;CCNB1;ZNRF3;PSMB2;ENC1;BUB3;FBXO5;SKP2;USP8;UBE2C;PLK1;RAD23A;CIT;DDB1;PSMC5;PSMA1;PSMC1;NEDD4;CLPP;CDK2;CDK1;DTL;ANAPC1;NFE2L2;MAD2L1;CUL4B
modification-dependent protein catabolic process (GO:0019941)	34/364	8.60139e-05	0.00216644	-2.112	12.9564	USP37;PSMD11;USP10;CCNF;CUL1;BUB1B;TNFAIP1;AURKB;AURKA;PCNP;CDC20;CCNB1;ZNRF3;PSMB2;BUB3;FBXO5;SKP2;USP8;UBE2C;PLK1;RAD23A;CIT;DDB1;PSMC5;PSMA1;PSMC1;NEDD4;CDK2;CDK1;DTL;ANAPC1;NFE2L2;MAD2L1;CUL4B
negative regulation of ubiquitin-protein ligase activity involved in mitotic cell cycle (GO:0051436)	1967-12-01	0.000115981	0.00290035	-1.71924	10.0454	CDC20;PSMC5;PSMD11;PSMA1;PSMB2;UBE2C;PSMC1;BUB1B;FBXO5;BUB3;ANAPC1;MAD2L1
regulation of DNA metabolic process (GO:0051052)	27/265	0.000125419	0.00311413	-2.05815	11.8792	TOP2A;RTEL1;PCNA;GMNN;BRCC3;TNFAIP1;FOXM1;CCNB1;GPER1;FIGNL1;DHX36;KPNA2;TIPIN;NPM1;RPA2;CDC7;CDC6;DEK;ESCO2;TERF1;SMC1A;SPIDR;STAG2;RAD51;CDK2;CDK1;RAD18
regulation of neuron differentiation (GO:0045664)	36/405	0.000134707	0.0033212	-2.03451	11.6118	SEMA5A;LPAR1;LRP4;RND2;GLI3;NEUROD1;CDC20;EDNRB;CUX2;CUX1;KATNA1;HMG20A;ECT2;CDK5RAP3;PLXNA4;CDON;TRIM67;EOMES;SPAG9;MED1;EPHA4;MEF2C;NEGR1;FN1;PAX6;CBFA2T2;MT3;POU3F2;PBX1;ETV5;CIT;CXCL12;NEDD4;VIM;EPHA3;FGFR1
nuclear transport (GO:0051169)	23/209	0.000140708	0.00344488	-1.91806	10.877	SLBP;NPM1;SET;NUP107;ANP32A;NUP133;CPSF1;POLDIP3;CPSF3;CSE1L;F2R;CDC40;IPO5;NEUROD1;TBRG1;ALKBH5;XPO1;IPO9;DDX39B;MYBBP1A;RSRC1;KPNA2;HNRNPA1
nucleotide-excision repair, DNA gap filling (GO:0006297)	2016-07-22	0.000165066	0.00401317	-1.43529	7.92018	POLD3;RFC3;RFC4;PCNA;LIG1;RPA1;RPA2
mitotic spindle organization (GO:0007052)	2016-08-31	0.00019236	0.00464449	-1.71563	9.21649	FLNA;TTK;KIF11;SMC1A;EML1;NDC80;AURKA;SPC25
cholesterol metabolic process (GO:0008203)	15/107	0.000201602	0.00483432	-1.81168	9.65988	FDPS;PRKAA1;HMGCS1;CNBP;INSIG1;HDLBP;HMGCR;SORL1;MT3;LSS;CYP39A1;NPC2;SNX17;LBR;LDLR
nucleocytoplasmic transport (GO:0006913)	22/204	0.000252947	0.00602428	-1.89741	9.6995	SLBP;NPM1;SET;NUP107;ANP32A;NUP133;CPSF1;POLDIP3;CPSF3;CSE1L;F2R;CDC40;IPO5;NEUROD1;ALKBH5;XPO1;IPO9;DDX39B;MYBBP1A;RSRC1;KPNA2;HNRNPA1
regulation of double-strand break repair (GO:2000779)	2016-07-24	0.000258308	0.00606938	-1.76412	9.00492	RTEL1;RAD51;FIGNL1;RPA2;DEK;FOXM1;SPIDR
regulation of microtubule polymerization or depolymerization (GO:0031110)	1952-10-01	0.000257336	0.00606938	-1.73541	8.8584	CCNB1;PSRC1;CDKN1B;CKAP2;SKA3;TERF1;SKA1;AURKB;SKA2;AURKA
negative regulation of ubiquitin-protein transferase activity (GO:0051444)	1974-12-01	0.000264341	0.00612887	-1.7413	8.87146	CDC20;PSMC5;PSMD11;PSMA1;PSMB2;UBE2C;PSMC1;BUB1B;FBXO5;BUB3;ANAPC1;MAD2L1
negative regulation of ligase activity (GO:0051352)	1974-12-01	0.000264341	0.00612887	-1.73831	8.85623	CDC20;PSMC5;PSMD11;PSMA1;PSMB2;UBE2C;PSMC1;BUB1B;FBXO5;BUB3;ANAPC1;MAD2L1
osteoblast differentiation (GO:0001649)	14/98	0.000273769	0.0063057	-1.76748	8.95459	MEF2C;IGFBP5;TPM4;TNC;HNRNPU;HSD17B4;RSL1D1;GJA1;SFRP1;MYBBP1A;FIGNL1;IARS;HNRNPC;SNRNP200
DNA ligation (GO:0006266)	2016-05-10	0.00028496	0.00647822	0.289353	-1.45814	TOP2A;XRCC6;LIG1;HMGB2;HMGB1
DNA unwinding involved in DNA replication (GO:0006268)	2016-05-10	0.00028496	0.00647822	0.391255	-1.97166	TOP2A;RAD51;MCM7;MCM4;MCM2
nucleotide-excision repair (GO:0006289)	1975-12-01	0.000295045	0.00666421	-1.7268	8.65301	POLD3;DDB1;DCLRE1A;RFC3;RFC4;PCNA;LIG1;POLR2B;RPA1;RPA2;RAD23A;GTF2H3
positive regulation of ubiquitin-protein transferase activity (GO:0051443)	13/87	0.000304099	0.00673829	-1.78709	8.93537	PSMD11;UBE2C;PLK1;CUL1;CDC20;PSMC5;CCNB1;PSMA1;PSMB2;PSMC1;CDK1;FBXO5;ANAPC1
cerebral cortex development (GO:0021987)	1943-09-01	0.000301644	0.00673829	-1.64723	8.23607	BBS2;TFAP2C;MDK;NDE1;CEP120;TACC3;TACC1;GART;CDON
centrosome organization (GO:0051297)	1964-11-01	0.000303862	0.00673829	-1.60162	8.00801	NPM1;SGOL1;NDE1;XRCC2;PLK1;CDK2;CDK1;KIF11;CKAP5;HAUS1;AURKA
metaphase plate congression (GO:0051310)	2016-06-17	0.000309576	0.00681652	-1.09205	5.44758	CENPE;CENPF;CCNB1;PSRC1;CDCA5;CDCA8
response to radiation (GO:0009314)	37/442	0.000326624	0.00714695	-2.04947	10.1266	PRKAA1;PDE1B;SLC1A3;ATP1A2;HMGCR;BRCC3;UACA;AURKB;PPP1CB;NRAS;FIGNL1;RAD54L;ECT2;LDLR;XRCC6;RRM1;TIPIN;VCAM1;HMGCS1;XRCC2;SMC1A;SPIDR;DDB1;MFAP4;SFRP1;CXCL12;RAD51;NEDD4;RFWD3;RBP1;KIT;NMT1;INTS7;DTL;PPID;RAD18;CUL4B
cholesterol biosynthetic process (GO:0006695)	1934-08-01	0.000329886	0.00717348	-1.59944	7.89701	FDPS;PRKAA1;HMGCS1;INSIG1;CNBP;HMGCR;LBR;LSS
establishment of RNA localization (GO:0051236)	18/153	0.000352237	0.00751941	-1.86601	9.12531	SLBP;RBFOX1;NUP107;NUP133;CPSF1;NUP188;POLDIP3;CPSF3;NXT2;CKAP5;CDC40;NUP93;ALKBH5;XPO1;DDX39B;NUP85;HNRNPA1;NUP37
RNA transport (GO:0050658)	18/153	0.000352237	0.00751941	-1.8634	9.11252	SLBP;RBFOX1;NUP107;NUP133;CPSF1;NUP188;POLDIP3;CPSF3;NXT2;CKAP5;CDC40;NUP93;ALKBH5;XPO1;DDX39B;NUP85;HNRNPA1;NUP37
nucleic acid transport (GO:0050657)	18/153	0.000352237	0.00751941	-1.86081	9.09986	SLBP;RBFOX1;NUP107;NUP133;CPSF1;NUP188;POLDIP3;CPSF3;NXT2;CKAP5;CDC40;NUP93;ALKBH5;XPO1;DDX39B;NUP85;HNRNPA1;NUP37
DNA damage checkpoint (GO:0000077)	1977-12-01	0.000365597	0.0077573	-1.65771	8.05502	TIPIN;NEK6;RFWD3;PLK1;CDK2;RBBP8;CDK1;RPA2;INTS7;BRCC3;FOXN3;DTL
regulation of cyclin-dependent protein serine/threonine kinase activity (GO:0000079)	13/89	0.000370214	0.00780795	-1.634	7.92916	CDKN1B;PLK1;CDC6;CDC25C;CKS1B;CCNB2;CCNB1;PSRC1;CCND2;CCNE2;CKS2;CDK5RAP3;CDKN3
double-strand break repair (GO:0006302)	15/114	0.000372699	0.00781329	-1.76651	8.57098	XRCC6;LIG1;DDX1;XRCC2;CDCA5;RPA1;RPA2;BRCC3;ESCO2;SPIDR;RAD54B;MORF4L1;RAD51;RBBP8;RAD54L
protein localization to chromosome (GO:0034502)	2016-07-26	0.000389825	0.00812367	-1.64096	7.89789	PLK1;CDK1;BUB1B;CASC5;ESCO2;CENPA;AURKB
tetrahydrofolate metabolic process (GO:0046653)	2016-06-18	0.000398088	0.00823954	-1.05063	5.04175	DHFR;ALDH1L1;MTHFD1;MTHFD2;TYMS;GART
attachment of spindle microtubules to kinetochore (GO:0008608)	2016-05-11	0.000400092	0.00823954	0.234823	-1.12687	SGOL1;CASC5;BUB3;AURKB;NDC80
positive regulation of ligase activity (GO:0051351)	13/92	0.000492107	0.0100752	-1.7538	8.0634	PSMD11;UBE2C;PLK1;CUL1;CDC20;PSMC5;CCNB1;PSMA1;PSMB2;PSMC1;CDK1;FBXO5;ANAPC1
establishment of mitotic spindle localization (GO:0040001)	2016-06-19	0.000505186	0.0102829	-1.22738	5.61807	GPSM2;NDE1;NUSAP1;SPRY2;CENPA;NDC80
negative regulation of cellular catabolic process (GO:0031330)	17/145	0.000527527	0.0106756	-1.88251	8.54622	UBE2C;PLK1;BUB1B;KLHL22;TTK;TERF1;MT3;CDC20;CENPF;TIMP3;SPRY2;BUB3;FBXO5;BUB1;ANAPC1;MAD1L1;MAD2L1
transcription-coupled nucleotide-excision repair (GO:0006283)	1947-09-01	0.000534182	0.0107481	-1.59336	7.22276	POLD3;RFC3;RFC4;PCNA;LIG1;POLR2B;RPA1;RPA2;GTF2H3
protein localization to chromosome, centromeric region (GO:0071459)	2016-05-12	0.000547132	0.0108836	-0.168509	0.761743	CDK1;BUB1B;CASC5;CENPA;AURKB
regulation of spindle organization (GO:0090224)	2016-05-12	0.000547132	0.0108836	0.0553772	-0.250332	TPX2;CCNB1;PSRC1;AURKB;AURKA
sterol metabolic process (GO:0016125)	15/119	0.000560714	0.0110907	-1.74795	7.86865	FDPS;PRKAA1;HMGCS1;INSIG1;CNBP;HDLBP;HMGCR;LSS;SORL1;MT3;CYP39A1;NPC2;SNX17;LBR;LDLR
microtubule organizing center organization (GO:0031023)	1970-11-01	0.000597816	0.0117582	-1.57886	7.01518	NPM1;SGOL1;NDE1;XRCC2;PLK1;CDK2;CDK1;KIF11;CKAP5;AURKA;HAUS1
mRNA transport (GO:0051028)	16/134	0.000636673	0.0124525	-1.81534	7.96177	SLBP;NUP107;NUP133;CPSF1;NUP188;POLDIP3;CPSF3;NXT2;CDC40;NUP93;ALKBH5;XPO1;DDX39B;NUP85;HNRNPA1;NUP37
positive regulation of neurogenesis (GO:0050769)	26/283	0.000714526	0.0138975	-1.9345	8.27199	SEMA5A;LPAR1;RND2;GLI3;NEUROD1;CUX2;CUX1;GPER1;ECT2;CDON;TRIM67;SPAG9;EPHA4;XRCC6;MEF2C;NEGR1;XRCC2;FN1;PAX6;CBFA2T2;ETV5;CXCL12;SNW1;KIT;EPHA3;FGFR1
sterol biosynthetic process (GO:0016126)	1939-08-01	0.000729368	0.0139148	-1.53519	6.56264	FDPS;PRKAA1;HMGCS1;INSIG1;CNBP;HMGCR;LBR;LSS
kinetochore organization (GO:0051383)	2016-05-13	0.000731313	0.0139148	-0.211609	0.904586	CENPE;CENPF;CENPA;SMC4;SMC2
regulation of double-strand break repair via homologous recombination (GO:0010569)	2016-05-13	0.000731313	0.0139148	-0.166787	0.712982	RTEL1;RAD51;FIGNL1;RPA2;SPIDR
mitotic metaphase plate congression (GO:0007080)	2016-05-13	0.000731313	0.0139148	-0.152351	0.651269	CENPE;CCNB1;PSRC1;CDCA5;CDCA8
double-strand break repair via homologous recombination (GO:0000724)	1961-10-01	0.000785002	0.0148556	-1.61399	6.79389	MORF4L1;RAD51;LIG1;XRCC2;RBBP8;RPA1;RPA2;RAD54L;SPIDR;RAD54B
nucleoside monophosphate biosynthetic process (GO:0009124)	1985-12-01	0.000807152	0.0151927	-1.67943	7.03168	PRPS2;ADK;AK3;ATP1A2;TK1;GBAS;ATP5F1;UMPS;TYMS;PFAS;PAICS;GART
nucleobase-containing compound transport (GO:0015931)	19/180	0.000826308	0.0154701	-1.80541	7.52646	SLBP;RBFOX1;NUP107;NUP133;CPSF1;NUP188;POLDIP3;CPSF3;NXT2;CKAP5;CDC40;NUP93;GJA1;ALKBH5;XPO1;DDX39B;NUP85;HNRNPA1;NUP37
regulation of protein serine/threonine kinase activity (GO:0071900)	34/416	0.000831243	0.0154797	-1.92374	8.01857	PRKAA1;CDKN1B;MAGED1;LPAR1;GPS2;HMGCR;STK3;CKS1B;DUSP14;CCNB2;CCNB1;CCND2;DUSP10;CHORDC1;CDK5RAP3;SPAG9;EPHA4;MEF2C;H2AFY;PLK1;CDC6;CDC25C;SORL1;SFRP1;PSRC1;PRKAR1B;CCNE2;KIT;CDK1;PDCD4;CKS2;SPRY2;FGFR1;CDKN3
recombinational repair (GO:0000725)	1962-10-01	0.00087769	0.0162582	-1.62464	6.69217	MORF4L1;RAD51;LIG1;XRCC2;RBBP8;RPA1;RPA2;RAD54L;SPIDR;RAD54B
mitotic cytokinesis (GO:0000281)	2016-06-22	0.000964301	0.0176755	-1.29317	5.21869	USP8;ANLN;PLK1;NUSAP1;CKAP2;CEP55
histone phosphorylation (GO:0016572)	2016-06-22	0.000964301	0.0176755	-1.24355	5.01843	PRKAA1;CDK2;CDK1;VRK1;AURKB;AURKA
regulation of G1/S transition of mitotic cell cycle (GO:2000045)	15/129	0.00118613	0.0216283	-1.82038	6.97889	DDX3X;CDKN1B;PSMD11;RPA2;CDC6;PSMC5;PSMA1;PSMB2;RFWD3;PSMC1;PDPN;CDK2;BRD7;GTSE1;CUL4B
positive regulation of nervous system development (GO:0051962)	27/313	0.00135479	0.0245758	-1.92902	7.14895	SEMA5A;LPAR1;RND2;GLI3;NEUROD1;CDC20;CUX2;CUX1;GPER1;ECT2;CDON;TRIM67;SPAG9;EPHA4;XRCC6;MEF2C;NEGR1;XRCC2;FN1;PAX6;CBFA2T2;ETV5;CXCL12;SNW1;KIT;EPHA3;FGFR1
regulation of cell cycle G1/S phase transition (GO:1902806)	15/131	0.00136429	0.0246205	-1.82093	6.74505	DDX3X;CDKN1B;PSMD11;RPA2;CDC6;PSMC5;PSMA1;PSMB2;RFWD3;PSMC1;PDPN;CDK2;BRD7;GTSE1;CUL4B
regulation of centrosome cycle (GO:0046605)	2016-06-24	0.00141412	0.0253889	-1.19165	4.37746	RANBP1;NPM1;XPO1;CHORDC1;CCNF;AURKA
negative regulation of catabolic process (GO:0009895)	19/190	0.00147976	0.0264318	-1.87953	6.82869	PRKAA1;UBE2C;PLK1;BUB1B;KLHL22;TTK;TERF1;MT3;CDC20;CENPF;TIMP3;FLNA;SPRY2;BUB3;FBXO5;BUB1;ANAPC1;MAD1L1;MAD2L1
G2 DNA damage checkpoint (GO:0031572)	1934-07-01	0.00152908	0.0271741	-1.41418	5.09881	NEK6;PLK1;RBBP8;CDK1;FOXN3;BRCC3;DTL
dentate gyrus development (GO:0021542)	2016-05-16	0.00156284	0.0276339	-0.784218	2.81433	NEUROD1;BTG2;MEF2C;CDK6;MDK
meiotic cell cycle process (GO:1903046)	1993-12-01	0.00162589	0.0286042	-1.71116	6.0818	TOP2A;RAD51;SGOL1;PLK1;CKS2;FBXO5;TUBG1;SMC4;SMC2;RAD54B;CDC25B;AURKA
positive regulation of cell division (GO:0051781)	14/120	0.0016596	0.0290514	-1.7123	6.0593	RANBP1;UBE2C;PLK1;KIF23;PTN;CDC6;TERF1;AURKB;CDC25B;AURKA;MDK;NUSAP1;BIRC5;ECT2
folic acid-containing compound metabolic process (GO:0006760)	2016-06-25	0.00169152	0.0291724	-1.18192	4.17754	DHFR;ALDH1L1;MTHFD1;MTHFD2;TYMS;GART
histone-serine phosphorylation (GO:0035404)	2016-04-09	0.0016888	0.0291724	1.71334	-6.05585	PRKAA1;VRK1;AURKB;AURKA
protein localization to kinetochore (GO:0034501)	2016-04-09	0.0016888	0.0291724	1.78072	-6.29402	CDK1;BUB1B;CASC5;AURKB
steroid biosynthetic process (GO:0006694)	13/108	0.00186615	0.0318702	-1.67863	5.78469	FDPS;MED1;PRKAA1;HMGCS1;CNBP;INSIG1;HSD17B4;PEX2;HMGCR;LSS;PBX1;CYP39A1;LBR
protein monoubiquitination (GO:0006513)	1946-08-01	0.00186049	0.0318702	-1.48878	5.13046	DDB1;UHRF1;NEDD4;UBE2T;CUL1;KLHL22;DTL;CUL4B
establishment of mitotic spindle orientation (GO:0000132)	2016-05-17	0.00195272	0.0331868	-0.721442	2.45695	GPSM2;NDE1;SPRY2;CENPA;NDC80
establishment of spindle localization (GO:0051293)	2016-06-26	0.00200833	0.0339669	-1.24159	4.19951	GPSM2;NDE1;NUSAP1;SPRY2;CENPA;NDC80
negative regulation of protein modification process (GO:0031400)	32/407	0.00207874	0.0349889	-1.93741	6.4956	DNMT1;CDKN1B;PSMD11;SET;BUB1B;GPS2;HMGCR;PPM1F;DUSP14;CDC20;CCNB1;DUSP10;PSMB2;CHORDC1;FBXO5;BUB3;SMYD3;NPM1;H2AFY;UBE2C;PLK1;SORL1;SFRP1;PSMC5;PSMA1;PRKAR1B;PSMC1;PDCD4;SPRY2;OGT;ANAPC1;MAD2L1
neural precursor cell proliferation (GO:0061351)	1947-08-01	0.00209793	0.0351428	-1.55208	5.19687	RRM1;NEUROD4;MELK;FABP7;NDE1;ORC3;EML1;GLI3
regulation of protein ubiquitination (GO:0031396)	20/212	0.00212786	0.0354745	-1.76083	5.87932	PSMD11;UBE2C;RNF180;PLK1;CUL1;BUB1B;CDC20;PSMC5;CCNB1;PSMA1;PSMB2;PSMC1;CDK2;CDK1;FBXO5;BUB3;OGT;ANAPC1;TRIM67;MAD2L1
regulation of protein modification by small protein conjugation or removal (GO:1903320)	21/228	0.00218026	0.0361758	-1.77418	5.88916	PSMD11;UBE2C;RNF180;PLK1;CUL1;BUB1B;PIAS1;CDC20;PSMC5;CCNB1;PSMA1;PSMB2;PSMC1;CDK2;CDK1;BUB3;FBXO5;OGT;ANAPC1;TRIM67;MAD2L1
regeneration (GO:0031099)	1997-12-01	0.00223996	0.0369911	-1.65711	5.46363	PRPS2;MED1;GJA1;CCNB1;CXCL12;CDK1;TNC;CTNNA1;ALDOC;MKI67;LPIN1;TYMS
DNA replication-dependent nucleosome organization (GO:0034723)	2016-04-10	0.0022856	0.0370457	1.42372	-4.69201	CHAF1B;NASP;HAT1;ASF1B
corticosteroid receptor signaling pathway (GO:0031958)	2016-04-10	0.0022856	0.0370457	1.44015	-4.74617	PTGES3;NEDD4;GPER1;ARID1A
DNA replication-dependent nucleosome assembly (GO:0006335)	2016-04-10	0.0022856	0.0370457	1.47585	-4.86382	CHAF1B;NASP;HAT1;ASF1B
folic acid-containing compound biosynthetic process (GO:0009396)	2016-04-10	0.0022856	0.0370457	1.49799	-4.93678	DHFR;MTHFD1;MTHFD2;GART
mitotic DNA integrity checkpoint (GO:0044774)	1937-07-01	0.00233535	0.0376777	-1.32513	4.34469	TOP2A;TIPIN;RFWD3;CDK2;CDK1;RPA2;FOXN3
cytoskeleton-dependent cytokinesis (GO:0061640)	2016-06-27	0.002368	0.0380291	-1.31003	4.28301	USP8;ANLN;PLK1;NUSAP1;CKAP2;CEP55
cellular response to radiation (GO:0071478)	14/126	0.00250741	0.0400843	-1.66479	5.35524	XRCC6;SPIDR;AURKB;DDB1;MFAP4;SFRP1;RAD51;NEDD4;FIGNL1;NMT1;INTS7;ECT2;PPID;CUL4B
negative regulation of protein ubiquitination (GO:0031397)	13/113	0.00267916	0.0424423	-1.63927	5.17944	PSMD11;UBE2C;BUB1B;CDC20;PSMC5;PSMA1;PSMB2;PSMC1;BUB3;FBXO5;OGT;ANAPC1;MAD2L1
response to ionizing radiation (GO:0010212)	14/127	0.00267845	0.0424423	-1.63598	5.16907	PRKAA1;RRM1;XRCC6;VCAM1;XRCC2;BRCC3;SPIDR;SFRP1;RAD51;RFWD3;FIGNL1;RAD54L;INTS7;ECT2
positive regulation of protein modification by small protein conjugation or removal (GO:1903322)	16/158	0.0030242	0.0471801	-1.69913	5.18878	PSMD11;UBE2C;RNF180;PLK1;CUL1;PIAS1;CDC20;PSMC5;CCNB1;PSMA1;PSMB2;PSMC1;CDK1;FBXO5;ANAPC1;TRIM67
neurogenesis (GO:0022008)	1939-07-01	0.00303214	0.0471801	-1.45597	4.44621	NEUROD1;CDK6;FABP7;CEP120;TACC3;TACC1;CIT
protein heterotetramerization (GO:0051290)	2016-04-11	0.0030131	0.0471801	1.07805	-3.29212	RRM1;RRM2;LRP4;ALDOC
regulation of attachment of spindle microtubules to kinetochore (GO:0051988)	2016-04-11	0.0030131	0.0471801	1.08766	-3.32149	CCNB1;SPAG5;ECT2;KNSTRN

## Sheet: GO_CC
Sox9_UP
Term	Overlap	P-value	Adjusted P-value	Z-score	Combined Score	Genes
contractile fiber part (GO:0044449)	29/167	1.89381e-09	7.00708e-07	-2.28372	32.363	RYR2;MYLK2;AHNAK;MYPN;MYOM2;TTN;MYOM3;SYNE1;MYH13;ANKRD1;TNNI1;MYH11;FLNC;ANKRD2;TIMP4;MYBPC3;NEBL;NPNT;KLHL41;MYL4;KRT19;DES;MYH3;OBSCN;MYL2;TNNT3;MYH4;CRYAB;IDO1
extracellular matrix (GO:0031012)	42/348	1.04728e-08	1.93748e-06	-2.2324	29.3653	SPON1;UCMA;LAMA4;WNT8A;LTBP2;PCSK6;NID1;OLFML2A;LTBP1;COL19A1;LOXL1;ADAMTSL1;ADAMTS15;ADAMTS5;ACAN;OTOA;PODNL1;RELN;ADAMTSL3;CHAD;HMCN2;HMCN1;TPSAB1;WNT4;COL26A1;VWF;SERPINF1;NPNT;HSPG2;COL1A1;BMP4;TGFBR3;VCAN;COL4A1;CILP;CRISPLD2;COL5A2;COL6A3;COL9A3;COL6A5;ZP3;MATN3
integral component of plasma membrane (GO:0005887)	81/1066	8.34132e-07	7.71572e-05	-2.14963	20.3562	ALK;FLT1;CHRM1;FLT3;NCMAP;SLC6A4;IL27RA;SPN;GHR;SLC22A13;EDNRA;STAB1;KDR;ENPP2;BDKRB1;CCR8;CD36;CLEC1B;SLC16A5;CCR2;RNF43;PDGFRA;SEMA6A;SLC13A4;AVPR1B;SCARA5;GPR35;COL25A1;IL1R1;TAAR5;LIFR;SLC6A11;OPRM1;ADRA2B;TGFBR3;CACNB2;BCAM;ADCY9;ADORA2A;VAMP1;PLA2R1;RGR;EPHA1;GPRC5C;MS4A1;CD44;CNGB1;NLGN3;SLC26A2;SLC22A6;EPHA10;NRXN1;SLC1A1;NRXN3;CSF2RB;MST1R;CRHR1;TRPM1;TRPM2;ERBB3;C9;ADAM23;ST3GAL5;S1PR4;…
proteinaceous extracellular matrix (GO:0005578)	30/239	6.61895e-07	7.71572e-05	-2.13631	20.2302	SPON1;UCMA;WNT8A;LTBP2;LTBP1;COL19A1;LOXL1;ADAMTSL1;ADAMTS5;ACAN;ADAMTS15;OTOA;RELN;PODNL1;ADAMTSL3;CHAD;HMCN2;WNT4;COL26A1;VWF;NPNT;BMP4;TGFBR3;VCAN;CILP;COL6A3;COL9A3;COL6A5;ZP3;MATN3
myosin complex (GO:0016459)	14/64	3.00041e-06	0.00022203	-2.0988	17.6566	MYBPC3;MYO16;MYOM2;MYL4;MYH3;MYO15B;MYL2;MYH13;MYH14;MYH11;MYO1H;MYH4;MYO1F;CGNL1
extracellular matrix part (GO:0044420)	19/127	8.32668e-06	0.000513478	-2.05504	15.5655	COL27A1;LAMA4;LAMA3;NID1;NPNT;USH2A;NTN1;HSPG2;COLQ;SPN;COL1A1;ACAN;ADAMTS1;COL4A1;COL5A3;COL5A2;COL4A3;HMCN2;HMCN1
dynein complex (GO:0030286)	1939-10-01	2.44046e-05	0.00125553	-2.24098	14.9702	DNAH3;DNAH12;DNAH11;DNAH10;DNAH2;DNAH17;DNAH5;CCDC114;DNAH6;DNAH9
extracellular region (GO:0005576)	100/1585	7.83911e-05	0.00241706	-2.42986	14.6404	CDA;OLFML2A;LOXL1;BPIFA2;FAM3B;KDR;SVEP1;CHGB;COL27A1;IL1R1;SERPINF1;SERPINF2;NPNT;HSPG2;PRLR;FNDC7;UTS2B;COL4A1;CRISPLD2;COL4A3;PLA2G10;PLA2R1;DSC3;CEMIP;COL13A1;KLK9;NID1;LTBP1;KLK6;SCUBE2;PDZD2;C9;WNT4;BDNF;CRIM1;EPHX3;IGF1;CP;ABHD15;COL1A1;BMP4;BPIFB1;COL5A3;PNOC;COL5A2;CD27;COL9A3;CSPG4;SHBG;NRP2;PRSS27;WFDC3;GHR;ADAMTS5;TPSAB1;SFTPB;EDN1;VWF;COL25A1;IL17RE;F2;CES4A;TMEFF2;VCAN;COL6A3;COL6A5…
collagen trimer (GO:0005581)	15/91	2.71466e-05	0.00125553	-2.03515	13.5952	C1QA;COL26A1;COL27A1;COL13A1;COL25A1;COL19A1;COLQ;COL1A1;COL4A1;COL5A3;COL5A2;COL4A3;COL6A3;COL9A3;COL6A5
contractile fiber (GO:0043292)	1936-09-01	7.36435e-05	0.00241706	-2.05704	12.3941	OBSCN;ABLIM2;MYL2;NRAP;MYH13;MYH11;MYH4;NPNT;IDO1
basement membrane (GO:0005604)	13/77	7.43631e-05	0.00241706	-2.05657	12.3913	LAMA4;LAMA3;NID1;NPNT;USH2A;NTN1;SPN;ACAN;COL4A1;ADAMTS1;COL4A3;HMCN2;HMCN1
myosin filament (GO:0032982)	2016-07-21	0.000105965	0.00301592	-1.9756	11.4661	MYBPC3;MYH3;MYH13;MYH14;MYH11;MYH4;MYOM2
axonemal dynein complex (GO:0005858)	2016-06-12	5.69025e-05	0.00233933	-1.67297	10.1347	DNAH3;DNAH2;DNAH17;DNAH5;CCDC114;DNAH6
axoneme part (GO:0044447)	2016-07-26	0.000319846	0.00845309	-1.9966	9.53021	DNAH3;DNAH2;DNAH17;DNAH5;ODF3;CCDC114;DNAH6
receptor complex (GO:0043235)	25/272	0.0005555	0.0137023	-2.089	8.96223	NRP2;FLT1;CHRNA9;ITPR2;CSF2RB;ITGAE;LRP2;ITGAL;TSPAN32;GHR;ERBB3;ITGB6;GRIA3;GRIA4;GABBR2;OSMR;NPNT;CD4;PTPRB;GRIN3A;P2RX3;ITGA11;ITGA7;PLA2R1;GPRC5C
integrin complex (GO:0008305)	2016-07-31	0.000790924	0.0161075	-1.9244	7.94484	ITGA11;ITGA7;ITGB6;ITGAE;NPNT;ITGAL;TSPAN32
protein complex involved in cell adhesion (GO:0098636)	2016-07-31	0.000790924	0.0161075	-1.87975	7.76048	ITGA11;ITGA7;ITGB6;ITGAE;NPNT;ITGAL;TSPAN32
external side of plasma membrane (GO:0009897)	19/191	0.00106832	0.0197638	-1.89722	7.4445	PDGFRA;VWF;FLT3;TNFRSF11A;ITGAE;ITGAL;DLK1;SPN;TGFBR3;BCAM;CD4;CD28;KDR;CD27;CD36;ITGB6;MS4A1;CD22;CD44
sarcomere (GO:0030017)	2016-07-31	0.000790924	0.0161075	-1.71817	7.09343	MYBPC3;MYLK2;MYH3;MYL2;MYH4;TIMP4;SYNE1
myofibril (GO:0030016)	2016-06-24	0.00119572	0.0210675	-1.50535	5.81068	OBSCN;ABLIM2;MYL2;NRAP;MYH13;MYH4
cytoplasmic dynein complex (GO:0005868)	2016-06-25	0.00143195	0.0230358	-1.52758	5.76004	DNAH3;DNAH2;DNAH17;DNAH5;CCDC114;DNAH6
myosin II complex (GO:0016460)	2016-06-25	0.00143195	0.0230358	-1.47119	5.54744	MYBPC3;MYH3;MYH13;MYH14;MYH11;MYH4
cell surface (GO:0009986)	32/437	0.0034609	0.0492512	-1.84127	5.54372	NLGN3;CIITA;SLC46A2;NRXN1;TGFA;PLG;NOD2;PKD1L3;MST1R;PCSK6;ITGAL;TSPAN32;SPN;GHR;SRPX2;CD36;WNT4;SCARA5;IL1R1;SERPINF2;SPTB;PRLR;TGFBR3;ITGA7;VAMP1;ACKR3;CSPG4;PLA2R1;DSCAML1;CRYAB;FOLR1;CD44
M band (GO:0031430)	2016-05-14	0.000827144	0.0161075	-1.0278	4.24322	OBSCN;MYOM2;KLHL41;MYOM3;TTN
muscle myosin complex (GO:0005859)	2016-05-18	0.00208931	0.0322103	-1.01995	3.50402	MYBPC3;MYH3;MYH13;MYH11;MYH4
I band (GO:0031674)	2016-05-19	0.00255118	0.0377574	-0.970666	3.18046	NEBL;ANKRD1;ANKRD2;MYPN;TTN
Sox9_DOWN
Term	Overlap	P-value	Adjusted P-value	Z-score	Combined Score	Genes
chromatin binding (GO:0003682)	50/420	5.61496e-10	4.00908e-07	-2.47166	36.4064	TOP2A;SUV39H1;ACTB;GLI3;ING5;CHAF1B;HMGN5;MIS18BP1;GPER1;NELFA;HMGN2;HMGN3;EOMES;MED1;HELLS;PBRM1;MEF2C;H2AFY;H2AFZ;ACTL6A;VRK1;PAX6;SMC1A;ARID1A;TERF1;MORF4L1;DNMT1;PRKAA1;HDAC1;UHRF1;CDCA5;SATB2;DDX1;CENPA;NEUROD1;DHX30;CUX1;POLR2B;MCMBP;SF3B1;RPA1;CDC6;SSRP1;CENPF;H1F0;STAG2;TTC5;UBE2T;HNRNPC;SSBP1
structure-specific DNA binding (GO:0043566)	34/241	8.77956e-09	3.1343e-06	-2.38018	30.1643	PCNA;MCM7;UHRF1;HDAC1;HMGB2;HMGB3;HMGB1;ACTB;NEUROD1;HMGN5;DHX36;HMGN2;HNRNPA1;HMGN3;MED1;XRCC6;H2AFY;H2AFZ;XRCC2;CNBP;ACTL6A;RPA1;RPA2;PAX6;RAD23A;TERF1;H1F0;HNRNPK;RAD51;MCM4;HNRNPC;SSBP1;TARDBP;RAD18
ATP binding (GO:0005524)	111/1494	1.32387e-08	3.1508e-06	-2.37467	30.082	SMARCAL1;ERCC6L;BUB1B;HNRNPU;MKI67;SMC4;ACTB;SMC2;NARS;RPS6KA6;SEPHS1;PRKACB;MAGI1;EPHA4;LIG1;VRK1;ILF2;ACLY;LARS2;MELK;DDX39B;MTHFD1;SUCLG2;KIF20A;SNRNP200;EPHA3;RTEL1;ABCB7;DDX1;TARS;TWF1;AK3;ACTR3B;STK3;DHX30;ORC4;DHX32;FIGNL1;DHX36;PGK1;TRAP1;XRCC6;UBE2C;NEK6;XRCC2;PLK1;CDC7;CDC6;SMARCA2;PAICS;TPX2;CDK6;UBE2T;CDK2;CDK1;UBA3;IARS;FGFR1;TOP2A;ABCD2;DDX3X;MCM7;ADK;KIF11;PFAS;FARS2;KIF15;PBK;TK1;…
nucleosome binding (GO:0031491)	1939-11-01	4.39497e-06	0.000784502	-2.51575	17.9888	HMGN5;HDAC1;UHRF1;H2AFZ;ACTL6A;VRK1;HNRNPC;HMGN2;ARID1A;HMGN3;ACTB
helicase activity (GO:0004386)	21/150	7.00985e-06	0.00100101	-2.29856	15.8756	SMARCAL1;HELLS;ERCC6L;RTEL1;XRCC6;DDX3X;MCM7;DDX1;NAV2;SMARCA2;RAD54B;DHX30;DHX32;DDX39B;DHX36;MCM3;MCM4;RAD54L;MCM5;SNRNP200;MCM2
ATPase activity (GO:0016887)	37/395	1.89748e-05	0.002258	-2.51291	15.3118	TOP2A;SMARCAL1;ABCD2;RTEL1;DDX3X;MCM7;ABCB7;DDX1;ATP1A2;KIF11;KIF15;RAD54B;DHX30;KATNA1;DHX36;ABCF2;ABCF3;XRCC6;RFC3;HSP90AA1;XRCC2;ATAD2;KIF23;KIF22;ATP5F1;GTF2H3;SMARCA2;CENPE;PSMC5;RAD51;DDX39B;PSMC1;MCM4;KIF2C;KIF20A;SNRNP200;ABCE1
DNA-dependent ATPase activity (GO:0008094)	14/80	2.76522e-05	0.00282052	-2.3049	13.5317	TOP2A;SMARCAL1;RFC3;XRCC6;RTEL1;DDX3X;MCM7;XRCC2;GTF2H3;SMARCA2;RAD54B;RAD51;DHX36;MCM4
nucleosomal DNA binding (GO:0031492)	2016-08-28	8.38317e-05	0.00665065	-2.44338	12.2488	HMGN5;HDAC1;H2AFZ;ACTL6A;HNRNPC;HMGN2;HMGN3;ACTB
damaged DNA binding (GO:0003684)	1964-12-01	5.71433e-05	0.00510004	-2.24456	11.8479	DDB1;XRCC6;RAD51;RPA1;HMGB2;RBBP8;RPA2;RAD23A;HMGB1;GTF2H3;RAD18;CUL4B
kinase binding (GO:0019900)	40/487	0.000132186	0.00858007	-2.43557	11.5892	TOP2A;USP37;PRKAA1;KIF11;FOXM1;HDAC9;ACTB;AURKA;PPP1CB;CCNB2;CCNB1;CCND2;SGOL1;FLNA;FBXO5;CDK5RAP3;SPAG9;TRAP1;MEF2C;NPM1;H2AFY;NEK6;RPS6;PLK1;ELP2;MSN;PAX6;ANK2;CDC6;CDC25C;CDC25B;ZC3HC1;TPX2;PRKAR1B;CCNE2;PRC1;TRIP6;SPRY2;KIF20A;PAM
histone kinase activity (GO:0035173)	2016-06-16	0.000197992	0.0117805	-2.38249	10.5814	PRKAA1;CDK2;CDK1;VRK1;AURKB;AURKA
histone binding (GO:0042393)	17/132	0.000130833	0.00858007	-2.16008	10.2783	NPM1;SET;UHRF1;VRK1;DEK;PHF6;SMARCA2;ING5;CHAF1B;IPO9;NASP;ANP32E;NCAPD2;BRD7;ASF1B;GLYR1;MCM2
protein kinase binding (GO:0019901)	36/437	0.000270609	0.0138011	-2.38439	10.2124	TOP2A;USP37;KIF11;FOXM1;HDAC9;ACTB;AURKA;PPP1CB;CCNB2;CCNB1;CCND2;FLNA;FBXO5;CDK5RAP3;SPAG9;TRAP1;MEF2C;NPM1;H2AFY;NEK6;RPS6;PLK1;ELP2;MSN;PAX6;ANK2;CDC25C;CDC25B;ZC3HC1;TPX2;PRKAR1B;CCNE2;PRC1;SPRY2;KIF20A;PAM
microtubule binding (GO:0008017)	19/171	0.00030771	0.014647	-2.2317	9.42564	GAS2L3;NDE1;PLK1;KIF23;KIF22;KIF11;TERF1;EML1;SKA1;KIF15;SKA2;CENPE;PSRC1;PRC1;KATNA1;NUSAP1;BIRC5;KIF2C;KIF20A
single-stranded DNA binding (GO:0003697)	1976-12-01	0.000241929	0.0132875	-2.10238	9.08425	HNRNPK;RAD51;MCM7;CNBP;HMGB2;RPA1;MCM4;RPA2;RAD23A;HMGB1;SSBP1;HNRNPA1
chromatin DNA binding (GO:0031490)	1968-11-01	0.000362412	0.0161726	-1.94473	8.02092	MED1;H1F0;HMGN5;H2AFY;HDAC1;H2AFZ;ACTL6A;HNRNPC;HMGN2;HMGN3;ACTB
histone deacetylase binding (GO:0042826)	1975-11-01	0.00075773	0.0300553	-2.06242	7.22819	TOP2A;MEF2C;HDAC1;GMNN;DHX36;NRIP1;KPNA2;LPIN1;HDAC9;PHF6;GLI3
DNA helicase activity (GO:0003678)	1951-09-01	0.000707006	0.0296942	-2.02005	7.10411	XRCC6;RTEL1;DDX3X;MCM7;MCM3;MCM4;MCM5;RAD54B;MCM2
single-stranded RNA binding (GO:0003727)	1952-09-01	0.00079979	0.0300553	-1.98503	6.95698	PTBP1;DDX3X;HNRNPH1;CNBP;DDX1;HNRNPF;MSI1;HNRNPC;HNRNPA1
tubulin binding (GO:0015631)	22/241	0.00125278	0.0447241	-2.18974	6.80404	GAS2L3;NDE1;PLK1;KIF23;KIF22;KIF11;TERF1;EML1;PHF6;SKA1;SKA2;KIF15;CENPE;GJA1;PSRC1;PRC1;KATNA1;NUSAP1;BIRC5;KIF2C;KIF20A;ARL8B

## Sheet: KEGG
Sox9_UP
Term	Overlap	P-value	Adjusted P-value	Z-score	Combined Score	Genes
Extracellular matrix organization_Homo sapiens_R-HSA-1474244	42/283	1.26989e-11	9.86705e-09	-2.11078	38.9102	COL13A1;PCOLCE2;NRXN1;LAMA4;LAMA3;LTBP2;PLG;PLOD1;ITGAE;NID1;ITGAL;LTBP1;COL19A1;LOXL1;ACAN;ADAMTS5;CAPN8;TTR;ADAMTS1;KDR;CAPN1;ITGB6;TPSAB1;COL26A1;COL27A1;COL25A1;HSPG2;COL1A1;BMP4;VCAN;COL4A1;COL5A3;COL4A3;COL5A2;ITGA11;COL6A3;ITGA7;COL9A3;COL6A5;MATN4;CD44;MATN3
Collagen biosynthesis and modifying enzymes_Homo sapiens_R-HSA-1650814	15/63	3.80268e-07	0.000142224	-2.01318	17.833	COL26A1;COL27A1;PCOLCE2;COL13A1;COL25A1;PLOD1;COL19A1;COL1A1;COL4A1;COL5A3;COL5A2;COL4A3;COL6A3;COL9A3;COL6A5
Collagen formation_Homo sapiens_R-HSA-1474290	17/85	5.49128e-07	0.000142224	-2.01017	17.8063	COL26A1;COL27A1;PCOLCE2;COL13A1;COL25A1;LAMA3;PLOD1;LOXL1;COL19A1;COL1A1;COL4A1;COL5A3;COL5A2;COL4A3;COL6A3;COL9A3;COL6A5
Degradation of the extracellular matrix_Homo sapiens_R-HSA-1474228	16/106	2.83643e-05	0.00550976	-1.95784	10.1832	COL26A1;COL13A1;COL25A1;LAMA3;PLG;NID1;HSPG2;COL19A1;ACAN;ADAMTS5;CAPN8;ADAMTS1;COL9A3;CAPN1;TPSAB1;CD44
Integrin cell surface interactions_Homo sapiens_R-HSA-216083	1967-12-01	6.7209e-05	0.0104443	-1.96523	8.96478	COL13A1;COL4A1;ITGA11;COL4A3;KDR;ITGA7;COL9A3;ITGAE;ITGB6;ITGAL;HSPG2;CD44
Striated Muscle Contraction_Homo sapiens_R-HSA-390522	1934-08-01	0.000225528	0.0219044	-2.05554	7.85434	MYBPC3;MYL4;DES;MYH3;MYL2;TNNT3;TNNI1;TTN
Assembly of collagen fibrils and other multimeric structures_Homo sapiens_R-HSA-2022090	1954-10-01	0.000213312	0.0219044	-1.96678	7.51521	COL1A1;COL27A1;COL4A1;COL5A3;COL5A2;COL4A3;LAMA3;COL6A3;COL6A5;LOXL1
Transport of glucose and other sugars, bile salts and organic acids, metal ions and amine compounds_Homo sapiens_R-HSA-425366	14/101	0.000200493	0.0219044	-1.92408	7.35204	SLC22A6;SLC10A6;SLC13A4;SLC47A1;SLC2A10;SLC41A2;SLC2A12;SLC6A11;CP;SLC2A7;SLC2A9;SLC22A15;RHAG;SLC22A8
Sox9_DOWN
Term	Overlap	P-value	Adjusted P-value	Z-score	Combined Score	Genes
Cell Cycle, Mitotic_Homo sapiens_R-HSA-69278	115/462	7.03936e-43	7.11679e-40	-2.47707	223.286	ERCC6L;NUP107;NUP188;GMNN;CASC5;BUB1B;SMC4;SMC2;PPP1CB;CDC20;CCND2;FBXO5;SKP2;GTSE1;TMPO;LIG1;VRK1;ESCO2;CDC25C;CDC25B;NUP93;CCNE2;KIF20A;MAD1L1;ANAPC1;SET;PSMD11;TUBGCP2;CDCA5;CUL1;NCAPG;CDCA8;PMF1;NCAPH;SKA1;SKA2;ORC4;CCNB2;DSN1;CCNB1;NUP85;ORC3;UBE2C;NEK6;PLK1;CDC7;CDC6;NDC80;DHFR;TPX2;CDK6;STAG2;CDK2;CDK1;TOP2A;CDKN1B;MCM7;MCM10;FOXM1;CKS1B;XPO1;SGOL1;NUF2;CNTRL;HSP90AA1;RFC3;RFC4;NUP133;H2AF…
Cell Cycle_Homo sapiens_R-HSA-1640170	123/566	8.87808e-41	4.48787e-38	-2.45209	210.872	ERCC6L;NUP107;NUP188;GMNN;CASC5;BUB1B;SMC4;SMC2;PPP1CB;CDC20;CCND2;FBXO5;SKP2;GTSE1;TMPO;LIG1;VRK1;ESCO2;CDC25C;CDC25B;NUP93;CCNE2;DKC1;KIF20A;MAD1L1;ANAPC1;SET;PSMD11;TUBGCP2;CDCA5;CUL1;NCAPG;CDCA8;BRCC3;PMF1;NCAPH;SKA1;SKA2;ORC4;CCNB2;DSN1;CCNB1;NUP85;ORC3;UBE2C;NEK6;PLK1;CDC7;CDC6;NDC80;DHFR;TPX2;CDK6;STAG2;CDK2;CDK1;TOP2A;CDKN1B;MCM7;MCM10;FOXM1;CKS1B;XPO1;SGOL1;MIS18BP1;NUF2;CNTRL;HSP90AA1;R…
M Phase_Homo sapiens_R-HSA-68886	66/268	5.79522e-24	1.46474e-21	-2.42301	116.238	ERCC6L;NUP107;NUP188;BUB1B;CASC5;SMC4;SMC2;CDC20;XPO1;SGOL1;NUF2;FBXO5;TMPO;NUP133;H2AFZ;VRK1;KIF23;SMC1A;CKAP5;NUP93;PSMA1;BIRC5;KIF2C;KIF20A;MAD1L1;ANAPC1;SET;PSMD11;CDCA5;NCAPG;CDCA8;CENPA;PMF1;NCAPH;SKA1;AURKB;SKA2;CCNB2;DSN1;CCNB1;PSMB2;NUP85;BUB3;BUB1;UBE2C;NDE1;NEK6;PLK1;NDC80;CENPE;PSMC5;CENPF;STAG2;CENPI;PSMC1;CENPK;CENPL;CDK1;CENPN;NCAPD2;LPIN1;CENPQ;SPC24;SPC25;MAD2L1;NUP37
Mitotic Prometaphase_Homo sapiens_R-HSA-68877	48/107	1.12776e-26	3.80054e-24	-2.03238	109.6	ERCC6L;NUP107;CDCA5;BUB1B;CASC5;NCAPG;CDCA8;SMC4;PMF1;CENPA;NCAPH;AURKB;SKA1;SMC2;SKA2;CDC20;CCNB2;CCNB1;DSN1;SGOL1;XPO1;NUP85;NUF2;BUB3;BUB1;NUP133;NDE1;PLK1;SMC1A;CKAP5;NDC80;CENPE;CENPF;STAG2;CENPI;CENPK;CENPL;CDK1;BIRC5;KIF2C;CENPN;NCAPD2;CENPQ;MAD1L1;SPC24;MAD2L1;NUP37;SPC25
Resolution of Sister Chromatid Cohesion_Homo sapiens_R-HSA-2500257	43/99	1.53281e-23	3.09935e-21	-2.05577	97.0796	ERCC6L;NUP107;CDCA5;BUB1B;CASC5;CDCA8;PMF1;CENPA;AURKB;SKA1;SKA2;CDC20;CCNB2;CCNB1;DSN1;SGOL1;XPO1;NUP85;NUF2;BUB3;BUB1;NUP133;NDE1;PLK1;SMC1A;CKAP5;NDC80;CENPE;CENPF;STAG2;CENPI;CENPK;CENPL;CDK1;BIRC5;KIF2C;CENPN;CENPQ;MAD1L1;SPC24;MAD2L1;NUP37;SPC25
Mitotic Metaphase and Anaphase_Homo sapiens_R-HSA-2555396	50/174	1.05421e-20	1.77635e-18	-2.30801	94.333	ERCC6L;NUP107;BUB1B;CASC5;CDC20;SGOL1;XPO1;NUF2;FBXO5;TMPO;NUP133;VRK1;SMC1A;CKAP5;PSMA1;BIRC5;KIF2C;MAD1L1;ANAPC1;PSMD11;CDCA5;CDCA8;PMF1;CENPA;AURKB;SKA1;SKA2;DSN1;PSMB2;NUP85;BUB3;BUB1;UBE2C;NDE1;PLK1;NDC80;CENPE;PSMC5;CENPF;STAG2;CENPI;PSMC1;CENPK;CENPL;CENPN;CENPQ;SPC24;MAD2L1;NUP37;SPC25
Mitotic Anaphase_Homo sapiens_R-HSA-68882	49/173	4.40764e-20	6.3659e-18	-2.29679	90.9429	ERCC6L;NUP107;BUB1B;CASC5;CDC20;SGOL1;XPO1;NUF2;TMPO;NUP133;VRK1;SMC1A;CKAP5;PSMA1;BIRC5;KIF2C;MAD1L1;ANAPC1;PSMD11;CDCA5;CDCA8;PMF1;CENPA;AURKB;SKA1;SKA2;DSN1;PSMB2;NUP85;BUB3;BUB1;UBE2C;NDE1;PLK1;NDC80;CENPE;PSMC5;CENPF;STAG2;CENPI;PSMC1;CENPK;CENPL;CENPN;CENPQ;SPC24;MAD2L1;NUP37;SPC25
Separation of Sister Chromatids_Homo sapiens_R-HSA-2467813	47/162	1.18839e-19	1.50183e-17	-2.26016	87.5523	ERCC6L;PSMD11;NUP107;CDCA5;BUB1B;CASC5;CDCA8;PMF1;CENPA;AURKB;SKA1;SKA2;CDC20;DSN1;SGOL1;XPO1;PSMB2;NUP85;NUF2;BUB3;BUB1;NUP133;UBE2C;NDE1;PLK1;SMC1A;CKAP5;NDC80;CENPE;PSMC5;CENPF;STAG2;PSMA1;CENPI;PSMC1;CENPK;CENPL;BIRC5;KIF2C;CENPN;CENPQ;MAD1L1;SPC24;ANAPC1;MAD2L1;NUP37;SPC25
RHO GTPases Activate Formins_Homo sapiens_R-HSA-5663220	38/114	9.74831e-18	1.09506e-15	-1.96108	67.5553	ERCC6L;NUP107;BUB1B;CASC5;CDCA8;PMF1;CENPA;AURKB;ACTB;SKA1;SKA2;CDC20;DSN1;SGOL1;XPO1;NUP85;NUF2;BUB3;BUB1;NUP133;NDE1;PLK1;CKAP5;NDC80;CENPE;CENPF;CENPI;CENPK;CENPL;BIRC5;KIF2C;CENPN;CENPQ;MAD1L1;SPC24;MAD2L1;NUP37;SPC25
S Phase_Homo sapiens_R-HSA-69242	35/124	1.3601e-14	1.25005e-12	-2.13837	58.6081	PRIM2;PCNA;PSMD11;CDKN1B;MCM7;CDCA5;PRIM1;CUL1;CKS1B;POLD3;ORC4;CDC45;PSMB2;ORC3;SKP2;GINS2;RFC3;RFC4;LIG1;RPA1;RPA2;ESCO2;CDC6;SMC1A;CDC25B;PSMC5;STAG2;CCNE2;PSMA1;PSMC1;CDK2;MCM3;MCM4;MCM5;MCM2
Mitotic G1-G1/S phases_Homo sapiens_R-HSA-453279	37/136	6.16045e-15	6.22822e-13	-2.05661	57.8	TOP2A;PRIM2;PCNA;PSMD11;CDKN1B;MCM7;HDAC1;PRIM1;CUL1;MCM10;TYMS;CKS1B;ORC4;CCNB1;CCND2;CDC45;PSMB2;ORC3;FBXO5;SKP2;RRM2;RPA1;RPA2;CDC7;CDC6;DHFR;PSMC5;CDK6;CCNE2;PSMA1;PSMC1;CDK2;CDK1;MCM3;MCM4;MCM5;MCM2
G1/S Transition_Homo sapiens_R-HSA-69206	33/112	2.86687e-14	2.41533e-12	-2.04903	54.81	PRIM2;PCNA;PSMD11;CDKN1B;MCM7;PRIM1;CUL1;MCM10;TYMS;CKS1B;ORC4;CCNB1;CDC45;PSMB2;ORC3;FBXO5;SKP2;RRM2;RPA1;RPA2;CDC7;CDC6;DHFR;PSMC5;CCNE2;PSMA1;PSMC1;CDK2;CDK1;MCM3;MCM4;MCM5;MCM2
RHO GTPase Effectors_Homo sapiens_R-HSA-195258	47/255	4.07862e-13	3.17191e-11	-2.16775	52.4033	CYFIP1;ERCC6L;CDKN1B;NUP107;CDCA8;BUB1B;CASC5;CENPA;PMF1;ACTB;SKA1;AURKB;SKA2;CDC20;PPP1CB;DSN1;XPO1;SGOL1;NUP85;NUF2;CTNNA1;FLNA;BUB3;BUB1;NUP133;H2AFZ;NDE1;PLK1;CDC25C;CKAP5;NDC80;CIT;CENPE;CENPF;CENPI;PRC1;CENPK;CENPL;BIRC5;CENPN;KIF2C;CENPQ;SPC24;MAD1L1;SPC25;MAD2L1;NUP37
DNA Replication_Homo sapiens_R-HSA-69306	29/105	4.23875e-12	3.06098e-10	-2.18919	47.9587	PRIM2;PCNA;PSMD11;CDKN1B;MCM7;PRIM1;GMNN;MCM10;POLD3;ORC4;CDC45;PSMB2;ORC3;GINS2;RFC3;RFC4;LIG1;RPA1;RPA2;CDC7;CDC6;PSMC5;PSMA1;PSMC1;CDK2;MCM3;MCM4;MCM5;MCM2
Cell Cycle Checkpoints_Homo sapiens_R-HSA-69620	37/182	1.24432e-11	8.38674e-10	-2.24528	46.9246	PSMD11;CDKN1B;MCM7;BUB1B;MCM10;BRCC3;CDC20;CCNB2;ORC4;CCNB1;CDC45;PSMB2;ORC3;RBBP8;BUB3;GTSE1;RFC3;RFC4;UBE2C;RPA1;RPA2;CDC7;CDC6;CDC25C;PSMC5;CCNE2;PSMA1;PSMC1;CDK2;CDK1;MCM3;MCM4;MCM5;MAD1L1;ANAPC1;MAD2L1;MCM2
Synthesis of DNA_Homo sapiens_R-HSA-69239	26/97	9.80551e-11	6.19586e-09	-2.16203	40.8611	PRIM2;PCNA;PSMD11;CDKN1B;MCM7;PRIM1;POLD3;ORC4;CDC45;PSMB2;ORC3;GINS2;RFC3;RFC4;LIG1;RPA1;RPA2;CDC6;PSMC5;PSMA1;PSMC1;CDK2;MCM3;MCM4;MCM5;MCM2
Signaling by Rho GTPases_Homo sapiens_R-HSA-194315	52/367	1.5601e-10	8.76254e-09	-2.06834	38.3735	ARHGAP11A;CYFIP1;ERCC6L;CDKN1B;NUP107;ARHGAP1;BUB1B;CASC5;ACTB;CDC20;PPP1CB;XPO1;SGOL1;NUF2;NUP133;H2AFZ;CDC25C;CKAP5;CIT;BIRC5;KIF2C;MAD1L1;ARHGAP19;CDCA8;CENPA;PMF1;SKA1;AURKB;SKA2;DSN1;NUP85;CTNNA1;FLNA;BUB3;ECT2;SRGAP1;BUB1;NDE1;PLK1;NDC80;CENPE;CENPF;CENPI;PRC1;CENPK;CENPL;CENPN;CENPQ;SPC24;SPC25;MAD2L1;NUP37
Activation of the pre-replicative complex_Homo sapiens_R-HSA-68962	16/30	1.53058e-10	8.76254e-09	-1.81821	33.7329	PRIM2;MCM7;PRIM1;RPA1;RPA2;CDC7;MCM10;CDC6;ORC4;CDC45;ORC3;CDK2;MCM3;MCM4;MCM5;MCM2
DNA strand elongation_Homo sapiens_R-HSA-69190	16/32	3.18509e-10	1.61006e-08	-1.8739	33.6261	GINS2;PRIM2;RFC3;RFC4;PCNA;LIG1;MCM7;PRIM1;RPA1;RPA2;POLD3;CDC45;MCM3;MCM4;MCM5;MCM2
M/G1 Transition_Homo sapiens_R-HSA-68874	22/82	2.74614e-09	1.26198e-07	-2.10879	33.4991	PRIM2;PSMD11;MCM7;PRIM1;GMNN;RPA1;RPA2;CDC7;MCM10;CDC6;ORC4;PSMC5;CDC45;PSMA1;PSMB2;PSMC1;ORC3;CDK2;MCM3;MCM4;MCM5;MCM2
DNA Replication Pre-Initiation_Homo sapiens_R-HSA-69002	22/82	2.74614e-09	1.26198e-07	-2.09836	33.3333	PRIM2;PSMD11;MCM7;PRIM1;GMNN;RPA1;RPA2;CDC7;MCM10;CDC6;ORC4;PSMC5;CDC45;PSMA1;PSMB2;PSMC1;ORC3;CDK2;MCM3;MCM4;MCM5;MCM2
Activation of ATR in response to replication stress_Homo sapiens_R-HSA-176187	17/37	2.46014e-10	1.30906e-08	-1.81557	32.9551	RFC3;RFC4;MCM7;RPA1;RPA2;CDC7;MCM10;CDC6;CDC25C;ORC4;CDC45;ORC3;CDK2;MCM3;MCM4;MCM5;MCM2
G2/M Checkpoints_Homo sapiens_R-HSA-69481	28/150	2.15987e-08	9.49402e-07	-2.1559	29.8968	PSMD11;MCM7;MCM10;BRCC3;CCNB2;ORC4;CCNB1;CDC45;PSMB2;ORC3;RBBP8;GTSE1;RFC3;RFC4;RPA1;RPA2;CDC7;CDC6;CDC25C;PSMC5;PSMA1;PSMC1;CDK2;CDK1;MCM3;MCM4;MCM5;MCM2
Regulation of mitotic cell cycle_Homo sapiens_R-HSA-453276	20/85	9.40987e-08	3.52347e-06	-2.06001	25.8656	PSMD11;UBE2C;PLK1;CUL1;BUB1B;AURKB;AURKA;CDC20;PSMC5;CCNB1;PSMA1;PSMB2;PSMC1;CDK2;CDK1;FBXO5;BUB3;SKP2;ANAPC1;MAD2L1
APC/C-mediated degradation of cell cycle proteins_Homo sapiens_R-HSA-174143	20/85	9.40987e-08	3.52347e-06	-2.05159	25.7598	PSMD11;UBE2C;PLK1;CUL1;BUB1B;AURKB;AURKA;CDC20;PSMC5;CCNB1;PSMA1;PSMB2;PSMC1;CDK2;CDK1;FBXO5;BUB3;SKP2;ANAPC1;MAD2L1
Chromosome Maintenance_Homo sapiens_R-HSA-73886	21/86	2.58508e-08	1.08897e-06	-1.87039	25.681	PRIM2;RFC3;NPM1;RFC4;PCNA;LIG1;H2AFZ;PRIM1;RPA1;CASC5;RPA2;TERF1;CENPA;POLD3;DKC1;CENPI;MIS18BP1;CENPK;CENPL;CENPN;CENPQ
Processing of Capped Intron-Containing Pre-mRNA_Homo sapiens_R-HSA-72203	31/193	8.10817e-08	3.27894e-06	-1.96108	24.7645	SLBP;SF3B3;NUP107;NUP188;POLDIP3;HNRNPU;CCAR1;EFTUD2;PTBP1;NUP85;POLR2B;HNRNPA1;SF3B1;SF3A3;CPSF1;NUP133;CPSF3;CDC40;NUP93;HNRNPL;LSM8;HNRNPK;LSM6;DDX39B;HNRNPH1;HNRNPF;HNRNPC;DNAJC8;SNRNP200;SLU7;NUP37
G2/M Transition_Homo sapiens_R-HSA-69275	28/173	3.04111e-07	1.06019e-05	-1.95828	22.4311	PSMD11;TUBGCP2;CUL1;FOXM1;AURKA;PPP1CB;CCNB2;CCNB1;XPO1;PSMB2;CNTRL;GTSE1;HSP90AA1;NDE1;PLK1;CDC25C;TUBG1;CKAP5;CDC25B;HAUS1;TPX2;NEDD1;PSMC5;CENPF;PSMA1;PSMC1;CDK2;CDK1
Mitotic G2-G2/M phases_Homo sapiens_R-HSA-453274	28/175	3.74534e-07	1.26218e-05	-1.95903	22.098	PSMD11;TUBGCP2;CUL1;FOXM1;AURKA;PPP1CB;CCNB2;CCNB1;XPO1;PSMB2;CNTRL;GTSE1;HSP90AA1;NDE1;PLK1;CDC25C;TUBG1;CKAP5;CDC25B;HAUS1;TPX2;NEDD1;PSMC5;CENPF;PSMA1;PSMC1;CDK2;CDK1
Removal of licensing factors from origins_Homo sapiens_R-HSA-69300	17/72	8.35956e-07	2.72629e-05	-1.9848	20.8602	PSMD11;CDKN1B;MCM7;GMNN;MCM10;CDC6;ORC4;PSMC5;PSMA1;PSMB2;PSMC1;ORC3;CDK2;MCM3;MCM4;MCM5;MCM2
E2F mediated regulation of DNA replication_Homo sapiens_R-HSA-113510	13/33	1.38992e-07	5.01862e-06	-1.69624	20.6981	PRIM2;RRM2;PCNA;PRIM1;CDC6;TYMS;DHFR;ORC4;CCNB1;CDC45;ORC3;CDK1;FBXO5
Regulation of DNA replication_Homo sapiens_R-HSA-69304	17/75	1.36111e-06	4.16994e-05	-2.0124	20.2951	PSMD11;CDKN1B;MCM7;GMNN;MCM10;CDC6;ORC4;PSMC5;PSMA1;PSMB2;PSMC1;ORC3;CDK2;MCM3;MCM4;MCM5;MCM2
Regulation of APC/C activators between G1/S and early anaphase_Homo sapiens_R-HSA-176408	17/79	2.5206e-06	7.28094e-05	-1.91807	18.2748	PSMD11;UBE2C;PLK1;CUL1;BUB1B;CDC20;PSMC5;CCNB1;PSMA1;PSMB2;PSMC1;CDK2;CDK1;FBXO5;BUB3;ANAPC1;MAD2L1
Nuclear Envelope Breakdown_Homo sapiens_R-HSA-2980766	14/51	1.74482e-06	5.18827e-05	-1.83623	18.1172	NUP107;NUP133;NUP188;NEK6;PLK1;VRK1;NUP93;CCNB2;CCNB1;NUP85;CDK1;LPIN1;NUP37;TMPO
mRNA Splicing - Major Pathway_Homo sapiens_R-HSA-72163	22/134	4.67541e-06	0.000131301	-1.71184	15.3005	SF3A3;SF3B3;CPSF1;CPSF3;HNRNPU;CDC40;CCAR1;HNRNPL;EFTUD2;LSM8;PTBP1;HNRNPK;LSM6;HNRNPH1;POLR2B;HNRNPF;HNRNPC;DNAJC8;SNRNP200;HNRNPA1;SF3B1;SLU7
Switching of origins to a post-replicative state_Homo sapiens_R-HSA-69052	15/70	1.02629e-05	0.000230573	-1.78655	14.9622	PSMD11;CDKN1B;MCM7;CDC6;ORC4;PSMC5;PSMA1;PSMB2;PSMC1;ORC3;CDK2;MCM3;MCM4;MCM5;MCM2
Orc1 removal from chromatin_Homo sapiens_R-HSA-68949	15/70	1.02629e-05	0.000230573	-1.77825	14.8927	PSMD11;CDKN1B;MCM7;CDC6;ORC4;PSMC5;PSMA1;PSMB2;PSMC1;ORC3;CDK2;MCM3;MCM4;MCM5;MCM2
SUMOylation of DNA replication proteins_Homo sapiens_R-HSA-4615885	1944-12-01	1.01808e-05	0.000230573	-1.7362	14.5405	NUP93;TOP2A;PCNA;NUP107;NUP133;NUP188;NUP85;BIRC5;CDCA8;AURKB;NUP37;AURKA
SUMO E3 ligases SUMOylate target proteins_Homo sapiens_R-HSA-3108232	18/96	6.99142e-06	0.000186009	-1.6847	14.4711	TOP2A;PCNA;NUP107;NUP133;NUP188;RPA1;CDCA8;SMC1A;AURKB;AURKA;PIAS1;NUP93;HNRNPK;STAG2;NUP85;BIRC5;HNRNPC;NUP37
Extension of Telomeres_Homo sapiens_R-HSA-180786	2016-10-28	8.0429e-06	0.000203284	-1.68467	14.3213	POLD3;PRIM2;RFC3;RFC4;PCNA;LIG1;DKC1;PRIM1;RPA1;RPA2
Assembly of the pre-replicative complex_Homo sapiens_R-HSA-68867	14/67	2.58217e-05	0.000511878	-1.78665	13.5382	PSMD11;MCM7;GMNN;CDC6;ORC4;PSMC5;PSMA1;PSMB2;PSMC1;ORC3;MCM3;MCM4;MCM5;MCM2
mRNA Splicing_Homo sapiens_R-HSA-72172	22/144	1.29608e-05	0.000278794	-1.6477	13.4865	SF3A3;SF3B3;CPSF1;CPSF3;HNRNPU;CDC40;CCAR1;HNRNPL;EFTUD2;LSM8;PTBP1;HNRNPK;LSM6;HNRNPH1;POLR2B;HNRNPF;HNRNPC;DNAJC8;SNRNP200;HNRNPA1;SF3B1;SLU7
SUMOylation_Homo sapiens_R-HSA-2990846	18/101	1.29162e-05	0.000278794	-1.58229	12.9511	TOP2A;PCNA;NUP107;NUP133;NUP188;RPA1;CDCA8;SMC1A;AURKB;AURKA;PIAS1;NUP93;HNRNPK;STAG2;NUP85;BIRC5;HNRNPC;NUP37
Lagging Strand Synthesis_Homo sapiens_R-HSA-69186	2016-09-20	5.16733e-06	0.000141194	-1.45966	12.9404	POLD3;PRIM2;RFC3;PCNA;RFC4;LIG1;PRIM1;RPA1;RPA2
DNA Repair_Homo sapiens_R-HSA-73894	32/285	4.91237e-05	0.000935791	-1.84464	12.8647	DCLRE1A;RTEL1;PCNA;USP10;BRCC3;ACTB;POLD3;EME1;POLR2B;RBBP8;KPNA2;TIPIN;XRCC6;RFC3;RFC4;LIG1;XRCC2;ACTL6A;RPA1;RPA2;RAD23A;GTF2H3;SPIDR;PIAS1;DDB1;RAD51;UBE2T;COPS2;CDK2;DTL;RAD18;CUL4B
Mitotic Prophase_Homo sapiens_R-HSA-68875	18/107	2.56994e-05	0.000511878	-1.66863	12.644	SET;NUP107;NUP133;NUP188;H2AFZ;NEK6;PLK1;VRK1;SMC4;SMC2;NUP93;CCNB2;CCNB1;NUP85;CDK1;LPIN1;TMPO;NUP37
Telomere C-strand (Lagging Strand) Synthesis_Homo sapiens_R-HSA-174417	2016-09-22	9.54793e-06	0.000229832	-1.41013	11.8143	POLD3;PRIM2;RFC3;PCNA;RFC4;LIG1;PRIM1;RPA1;RPA2
Recognition of DNA damage by PCNA-containing replication complex_Homo sapiens_R-HSA-110314	2016-10-28	8.0429e-06	0.000203284	-1.37776	11.7122	DDB1;POLD3;RFC3;RFC4;PCNA;RPA1;RPA2;DTL;RAD18;CUL4B
Activation of APC/C and APC/C:Cdc20 mediated degradation of mitotic proteins_Homo sapiens_R-HSA-176814	14/75	7.61184e-05	0.0013501	-1.68137	11.1098	PSMD11;UBE2C;PLK1;BUB1B;CDC20;PSMC5;CCNB1;PSMA1;PSMB2;PSMC1;CDK1;BUB3;ANAPC1;MAD2L1
Nuclear Pore Complex (NPC) Disassembly_Homo sapiens_R-HSA-3301854	1934-10-01	3.25965e-05	0.000633751	-1.45791	10.7358	NUP93;CCNB2;CCNB1;NUP107;NUP133;NUP188;NUP85;NEK6;CDK1;NUP37
Global Genome Nucleotide Excision Repair (GG-NER)_Homo sapiens_R-HSA-5696399	15/82	5.20774e-05	0.000957277	-1.5137	10.5224	RFC3;RFC4;PCNA;LIG1;ACTL6A;RPA1;RPA2;RAD23A;GTF2H3;ACTB;PIAS1;DDB1;POLD3;COPS2;CUL4B
Cyclin A/B1 associated events during G2/M transition_Homo sapiens_R-HSA-69273	2016-09-22	9.54793e-06	0.000229832	-1.24779	10.4542	CCNB2;CCNB1;XPO1;PLK1;CDK2;CDK1;FOXM1;CDC25C;CDC25B
APC/C:Cdc20 mediated degradation of mitotic proteins_Homo sapiens_R-HSA-176409	13/74	0.000232352	0.00367044	-1.65971	9.30674	PSMD11;UBE2C;BUB1B;CDC20;PSMC5;CCNB1;PSMA1;PSMB2;PSMC1;CDK1;BUB3;ANAPC1;MAD2L1
DNA Damage Bypass_Homo sapiens_R-HSA-73893	1946-11-01	6.67734e-05	0.0012055	-1.37855	9.26506	DDB1;POLD3;RFC3;RFC4;PCNA;USP10;RPA1;RPA2;DTL;RAD18;CUL4B
Telomere Maintenance_Homo sapiens_R-HSA-157579	1959-12-01	0.000121527	0.00208244	-1.48632	9.17684	POLD3;PRIM2;RFC3;RFC4;PCNA;LIG1;DKC1;H2AFZ;PRIM1;RPA1;RPA2;TERF1
Nucleotide Excision Repair_Homo sapiens_R-HSA-5696398	16/108	0.000266888	0.00384866	-1.44757	8.04853	RFC3;PCNA;RFC4;LIG1;ACTL6A;RPA1;RPA2;RAD23A;GTF2H3;ACTB;PIAS1;DDB1;POLD3;POLR2B;COPS2;CUL4B
Transport of Mature Transcript to Cytoplasm_Homo sapiens_R-HSA-72202	13/74	0.000232352	0.00367044	-1.40628	7.88561	SLBP;NUP107;CPSF1;NUP133;NUP188;POLDIP3;CPSF3;CDC40;NUP93;DDX39B;NUP85;SLU7;NUP37
HDR through Homologous Recombination (HRR)_Homo sapiens_R-HSA-5685942	1964-12-01	0.000237038	0.00368686	-1.35296	7.58062	POLD3;RFC3;RTEL1;RFC4;PCNA;RAD51;EME1;XRCC2;RBBP8;RPA1;RPA2;SPIDR
Interactions of Rev with host cellular proteins_Homo sapiens_R-HSA-177243	1935-09-01	0.000192773	0.00314345	-1.30439	7.51646	NUP93;RANBP1;NPM1;NUP107;XPO1;NUP133;NUP188;NUP85;NUP37
The role of GTSE1 in G2/M progression after G2 checkpoint_Homo sapiens_R-HSA-8852276	1959-11-01	0.000446832	0.00561621	-1.43038	7.41238	CCNB2;HSP90AA1;PSMC5;CCNB1;PSMD11;PSMA1;PSMB2;PSMC1;PLK1;CDK1;GTSE1
APC/C:Cdh1 mediated degradation of Cdc20 and other APC/C:Cdh1 targeted proteins in late mitosis/early G1_Homo sapiens_R-HSA-174178	1971-12-01	0.000546493	0.00657743	-1.45671	7.31869	CDC20;PSMC5;PSMD11;PSMA1;PSMB2;UBE2C;PSMC1;PLK1;SKP2;AURKB;ANAPC1;AURKA
Cdc20:Phospho-APC/C mediated degradation of Cyclin A_Homo sapiens_R-HSA-174184	1971-12-01	0.000546493	0.00657743	-1.42684	7.1686	CDC20;PSMC5;PSMD11;PSMA1;PSMB2;UBE2C;PSMC1;CDK1;BUB1B;BUB3;ANAPC1;MAD2L1
G1/S-Specific Transcription_Homo sapiens_R-HSA-69205	2016-08-17	1.36012e-05	0.000286476	-0.874728	7.13591	DHFR;PCNA;RRM2;CDC45;CDK1;CDC6;FBXO5;TYMS
APC:Cdc20 mediated degradation of cell cycle proteins prior to satisfation of the cell cycle checkpoint_Homo sapiens_R-HSA-179419	1972-12-01	0.000610584	0.00719262	-1.43105	7.06179	CDC20;PSMC5;PSMD11;PSMA1;PSMB2;UBE2C;PSMC1;CDK1;BUB1B;BUB3;ANAPC1;MAD2L1
Cyclin A:Cdk2-associated events at S phase entry_Homo sapiens_R-HSA-69656	1969-12-01	0.000435149	0.00561621	-1.35494	7.02144	PSMC5;PSMD11;CDKN1B;CCNE2;PSMA1;PSMB2;PSMC1;CDK2;CUL1;SKP2;CDC25B;CKS1B
Condensation of Prometaphase Chromosomes_Homo sapiens_R-HSA-2514853	2016-08-11	1.2261e-06	3.87371e-05	-0.670473	6.81115	CCNB2;CCNB1;CDK1;NCAPG;NCAPD2;SMC4;NCAPH;SMC2
Regulation of PLK1 Activity at G2/M Transition_Homo sapiens_R-HSA-2565942	14/87	0.000302649	0.0042497	-1.22755	6.70352	HSP90AA1;NDE1;PLK1;CUL1;TUBG1;CKAP5;AURKA;HAUS1;PPP1CB;NEDD1;CCNB2;CCNB1;CNTRL;CDK1
Gene Expression_Homo sapiens_R-HSA-74160	110/1631	0.000796502	0.00865875	-1.41091	6.70065	RPL4;NUP107;RPL3;NUP188;HNRNPU;ACTB;CCAR1;NARS;EFTUD2;SESN1;MED1;RPS6;CDC25C;CDC40;NUP93;LARS2;DDX39B;CCNE2;DKC1;XRN2;SNRNP200;NOTCH2;SLBP;DNMT1;SET;PSMD11;ANP32A;DDX1;TARS;CCNB1;NUP85;PRDX1;SSR1;ZKSCAN1;CPSF1;CPSF3;EIF2S2;EIF2S1;HNRNPL;PAN2;TPX2;LSM8;HNRNPK;SNW1;LSM6;AGO1;HNRNPF;CDK2;CDK1;MPHOSPH10;INTS7;HNRNPC;IARS;INTS9;INTS12;BTG2;CDKN1B;SUV39H1;FARS2;ING5;PTBP1;XPO1;NELFA;RFC3;HSP90AA1;RFC4;…
SCF(Skp2)-mediated degradation of p27/p21_Homo sapiens_R-HSA-187577	1959-11-01	0.000446832	0.00561621	-1.21787	6.31114	PSMC5;PSMD11;CDKN1B;CCNE2;PSMA1;PSMB2;PSMC1;CDK2;CUL1;SKP2;CKS1B
Gap-filling DNA repair synthesis and ligation in TC-NER_Homo sapiens_R-HSA-6782210	1962-11-01	0.000645828	0.00733132	-1.21174	5.95642	DDB1;POLD3;RFC3;RFC4;PCNA;LIG1;POLR2B;RPA1;RPA2;GTF2H3;CUL4B
Transport of Mature mRNAs Derived from Intronless Transcripts_Homo sapiens_R-HSA-159234	1938-09-01	0.000326158	0.00451707	-1.10116	5.94612	NUP93;SLBP;NUP107;CPSF1;NUP133;NUP188;NUP85;CPSF3;NUP37
TP53 Regulates Transcription of Cell Cycle Genes_Homo sapiens_R-HSA-6791312	1948-10-01	0.000375825	0.00506612	-1.10992	5.86615	NPM1;BTG2;CCNB1;PCNA;CDKN1B;CCNE2;CDK2;CDK1;CDC25C;AURKA
Dual Incision in GG-NER_Homo sapiens_R-HSA-5696400	1939-09-01	0.000384731	0.00511793	-1.0944	5.77295	DDB1;POLD3;RFC3;RFC4;PCNA;RPA1;RPA2;GTF2H3;CUL4B
HDR through Homologous Recombination (HR) or Single Strand Annealing (SSA)_Homo sapiens_R-HSA-5693567	15/112	0.00105439	0.0112209	-1.26156	5.66438	TIPIN;RFC3;RTEL1;PCNA;RFC4;XRCC2;RPA1;RPA2;BRCC3;SPIDR;POLD3;RAD51;EME1;CDK2;RBBP8
Deposition of new CENPA-containing nucleosomes at the centromere_Homo sapiens_R-HSA-606279	1952-10-01	0.00065264	0.00733132	-1.13156	5.5623	NPM1;CENPI;MIS18BP1;H2AFZ;CENPK;CENPL;CASC5;CENPN;CENPQ;CENPA
Nucleosome assembly_Homo sapiens_R-HSA-774815	1952-10-01	0.00065264	0.00733132	-1.12396	5.52495	NPM1;CENPI;MIS18BP1;H2AFZ;CENPK;CENPL;CASC5;CENPN;CENPQ;CENPA
Transcription-Coupled Nucleotide Excision Repair (TC-NER)_Homo sapiens_R-HSA-6781827	1976-12-01	0.000933591	0.0100411	-1.19737	5.50917	DDB1;POLD3;RFC3;RFC4;PCNA;LIG1;POLR2B;COPS2;RPA1;RPA2;GTF2H3;CUL4B
Transcriptional Regulation by TP53_Homo sapiens_R-HSA-3700989	31/348	0.00240024	0.0216665	-1.37888	5.28387	PRKAA1;BTG2;CDKN1B;PCNA;HDAC1;AURKB;AURKA;ING5;CCNB1;POLR2B;PRDX1;SESN1;RBBP8;NELFA;BRD7;NPM1;RFC3;RFC4;TXNRD1;RPA1;RPA2;SSRP1;GTF2H3;CDC25C;TPX2;CCNE2;TTC5;AGO1;CDK2;CDK1;BIRC5
DNA Double-Strand Break Repair_Homo sapiens_R-HSA-5693532	17/145	0.00189225	0.0178529	-1.25542	5.05382	TIPIN;XRCC6;RFC3;RTEL1;PCNA;RFC4;XRCC2;RPA1;RPA2;BRCC3;SPIDR;POLD3;RAD51;EME1;CDK2;RBBP8;KPNA2
Homology Directed Repair_Homo sapiens_R-HSA-5693538	15/118	0.00168843	0.0162572	-1.1957	4.92535	TIPIN;RFC3;RTEL1;PCNA;RFC4;XRCC2;RPA1;RPA2;BRCC3;SPIDR;POLD3;RAD51;EME1;CDK2;RBBP8
HIV Infection_Homo sapiens_R-HSA-162906	22/222	0.00314722	0.0274297	-1.35696	4.87979	RANBP1;XRCC6;NPM1;PSMD11;NUP107;NUP188;LIG1;NUP133;SSRP1;GTF2H3;NUP93;PSMC5;XPO1;PSMA1;PSMB2;NUP85;POLR2B;PSMC1;NMT1;NELFA;SLC25A5;NUP37
Cyclin E associated events during G1/S transition_Homo sapiens_R-HSA-69202	1968-11-01	0.00126745	0.0128139	-1.11665	4.86551	PSMC5;PSMD11;CDKN1B;CCNE2;PSMA1;PSMB2;PSMC1;CDK2;CUL1;SKP2;CKS1B
PCNA-Dependent Long Patch Base Excision Repair_Homo sapiens_R-HSA-5651801	2016-07-19	0.000163181	0.00270453	-0.731573	4.32566	POLD3;RFC3;PCNA;RFC4;LIG1;RPA1;RPA2
Infectious disease_Homo sapiens_R-HSA-5663205	30/348	0.00436361	0.0336621	-1.26739	4.29821	RPL4;RPL3;PSMD11;NUP107;NUP188;IPO5;XPO1;PSMB2;NUP85;POLR2B;NELFA;KPNA2;RANBP1;XRCC6;NPM1;HSP90AA1;LIG1;NUP133;TXNRD1;RPS6;SSRP1;GTF2H3;NUP93;MSRA;PSMC5;PSMA1;PSMC1;NMT1;SLC25A5;NUP37
Rev-mediated nuclear export of HIV RNA_Homo sapiens_R-HSA-165054	1933-08-01	0.000611835	0.00719262	-0.861353	4.25052	NUP93;RANBP1;NUP107;XPO1;NUP133;NUP188;NUP85;NUP37
Host Interactions of HIV factors_Homo sapiens_R-HSA-162909	15/129	0.00367484	0.0290255	-1.1756	4.16115	RANBP1;NPM1;PSMD11;NUP107;NUP133;NUP188;NUP93;PSMC5;XPO1;PSMA1;PSMB2;NUP85;PSMC1;SLC25A5;NUP37
Gap-filling DNA repair synthesis and ligation in GG-NER_Homo sapiens_R-HSA-5696397	2016-07-23	0.000427672	0.00561528	-0.789263	4.09017	POLD3;RFC3;PCNA;RFC4;LIG1;RPA1;RPA2
Dual incision in TC-NER_Homo sapiens_R-HSA-6782135	1963-10-01	0.00235985	0.0214938	-0.961193	3.69097	DDB1;POLD3;RFC3;RFC4;PCNA;POLR2B;RPA1;RPA2;GTF2H3;CUL4B
Processive synthesis on the lagging strand_Homo sapiens_R-HSA-69183	2016-07-15	4.99829e-05	0.000935791	-0.522946	3.64709	POLD3;PRIM2;PCNA;LIG1;PRIM1;RPA1;RPA2
AURKA Activation by TPX2_Homo sapiens_R-HSA-8854518	1972-11-01	0.00190713	0.0178529	-0.859842	3.46137	TPX2;NEDD1;HSP90AA1;NDE1;CNTRL;PLK1;CDK1;TUBG1;CKAP5;AURKA;HAUS1
Resolution of AP sites via the multiple-nucleotide patch replacement pathway_Homo sapiens_R-HSA-110373	2016-07-22	0.000341781	0.00466947	-0.614444	3.29755	POLD3;RFC3;PCNA;RFC4;LIG1;RPA1;RPA2
Transport of Mature mRNA Derived from an Intronless Transcript_Homo sapiens_R-HSA-159231	1937-08-01	0.00116715	0.0121708	-0.743099	3.27611	NUP93;NUP107;CPSF1;NUP133;NUP188;NUP85;CPSF3;NUP37
Mitotic Spindle Checkpoint_Homo sapiens_R-HSA-69618	2016-07-21	0.000270281	0.00384866	-0.570311	3.17095	CDC20;UBE2C;BUB1B;BUB3;MAD1L1;ANAPC1;MAD2L1
Regulation of TP53 Activity_Homo sapiens_R-HSA-5633007	16/151	0.00623368	0.045016	-0.913775	2.83338	PRKAA1;RFC3;RFC4;HDAC1;RPA1;RPA2;SSRP1;AURKB;AURKA;TPX2;ING5;TTC5;CDK2;RBBP8;CDK1;BRD7
Cellular response to heat stress_Homo sapiens_R-HSA-3371556	1996-12-01	0.00536068	0.0395595	-0.870367	2.81124	NUP93;HSP90AA1;NUP107;NUP133;NUP188;NUP85;PTGES3;RPA1;SERPINH1;RPA2;HSPA14;NUP37
Recruitment of mitotic centrosome proteins and complexes_Homo sapiens_R-HSA-380270	1979-11-01	0.0036436	0.0290054	-0.780215	2.76217	NEDD1;HSP90AA1;CCNB1;TUBGCP2;NDE1;CNTRL;PLK1;CDK1;TUBG1;CKAP5;HAUS1
Centrosome maturation_Homo sapiens_R-HSA-380287	1979-11-01	0.0036436	0.0290054	-0.770766	2.72872	NEDD1;HSP90AA1;CCNB1;TUBGCP2;NDE1;CNTRL;PLK1;CDK1;TUBG1;CKAP5;HAUS1
Transport of Mature mRNA derived from an Intron-Containing Transcript_Homo sapiens_R-HSA-159236	1968-10-01	0.00386504	0.0302911	-0.773673	2.70546	NUP93;NUP107;NUP133;DDX39B;NUP188;NUP85;POLDIP3;SLU7;CDC40;NUP37
CDT1 association with the CDC6:ORC:origin complex_Homo sapiens_R-HSA-68827	1958-09-01	0.00439505	0.0336621	-0.787771	2.67163	ORC4;PSMC5;PSMD11;PSMA1;PSMB2;PSMC1;ORC3;GMNN;CDC6
Termination of translesion DNA synthesis_Homo sapiens_R-HSA-5656169	2016-07-30	0.00161879	0.0158772	-0.601777	2.49308	POLD3;RFC3;RFC4;PCNA;USP10;RPA1;RPA2
SUMOylation of RNA binding proteins_Homo sapiens_R-HSA-4570464	1945-08-01	0.00343597	0.0285547	-0.639825	2.27518	NUP93;HNRNPK;NUP107;NUP133;NUP188;NUP85;HNRNPC;NUP37
Metabolism of nucleotides_Homo sapiens_R-HSA-15869	1987-11-01	0.00697684	0.0493258	-0.744821	2.2414	RRM1;RRM2;TXNRD1;ADK;TK1;UMPS;TYMS;NUDT5;PAICS;GART;PFAS
G0 and Early G1_Homo sapiens_R-HSA-1538133	2016-07-25	0.000650804	0.00733132	-0.37563	1.84645	TOP2A;PCNA;CCNE2;HDAC1;CDK2;CDK1;CDC6
NEP/NS2 Interacts with the Cellular Export Machinery_Homo sapiens_R-HSA-168333	2016-07-30	0.00161879	0.0158772	-0.431347	1.78702	NUP93;NUP107;XPO1;NUP133;NUP188;NUP85;NUP37
Export of Viral Ribonucleoproteins from Nucleus_Homo sapiens_R-HSA-168274	2016-07-31	0.00190411	0.0178529	-0.421507	1.69682	NUP93;NUP107;XPO1;NUP133;NUP188;NUP85;NUP37
Nuclear import of Rev protein_Homo sapiens_R-HSA-180746	1932-07-01	0.0022269	0.0204672	-0.429875	1.67175	NUP93;NPM1;NUP107;NUP133;NUP188;NUP85;NUP37
Transport of the SLBP Dependant Mature mRNA_Homo sapiens_R-HSA-159230	1934-07-01	0.00299767	0.0265846	-0.433426	1.57222	NUP93;SLBP;NUP107;NUP133;NUP188;NUP85;NUP37
Base Excision Repair_Homo sapiens_R-HSA-73884	1935-07-01	0.00345226	0.0285547	-0.412415	1.46652	POLD3;RFC3;RFC4;PCNA;LIG1;RPA1;RPA2
Resolution of Abasic Sites (AP sites)_Homo sapiens_R-HSA-73933	1935-07-01	0.00345226	0.0285547	-0.396859	1.4112	POLD3;RFC3;RFC4;PCNA;LIG1;RPA1;RPA2
Translesion synthesis by Y family DNA polymerases bypasses lesions on DNA template_Homo sapiens_R-HSA-110313	1937-07-01	0.00451691	0.0343353	-0.387675	1.30708	POLD3;RFC3;RFC4;PCNA;USP10;RPA1;RPA2
Interactions of Vpr with host cellular proteins_Homo sapiens_R-HSA-176033	1935-07-01	0.00345226	0.0285547	-0.359307	1.27767	NUP93;NUP107;NUP133;NUP188;NUP85;SLC25A5;NUP37
NS1 Mediated Effects on Host Pathways_Homo sapiens_R-HSA-168276	1939-07-01	0.00581226	0.0422748	-0.284313	0.899442	NUP93;NUP107;NUP133;NUP188;NUP85;KPNA2;NUP37
Presynaptic phase of homologous DNA pairing and strand exchange_Homo sapiens_R-HSA-5693616	1939-07-01	0.00581226	0.0422748	-0.23155	0.732523	RFC3;RFC4;RAD51;XRCC2;RPA1;RBBP8;RPA2
Unwinding of DNA_Homo sapiens_R-HSA-176974	2016-07-12	1.67398e-05	0.000345386	-0.0618157	0.492724	GINS2;CDC45;MCM7;MCM3;MCM4;MCM5;MCM2
APC-Cdc20 mediated degradation of Nek2A_Homo sapiens_R-HSA-179409	2016-06-25	0.0030807	0.0270834	-0.109998	0.396966	CDC20;UBE2C;BUB1B;BUB3;ANAPC1;MAD2L1
Inhibition of the proteolytic activity of APC/C required for the onset of anaphase by mitotic spindle checkpoint components_Homo sapiens_R-HSA-141405	2016-06-20	0.00117976	0.0121708	0.0567269	-0.250093	CDC20;UBE2C;BUB1B;BUB3;ANAPC1;MAD2L1
Inactivation of APC/C via direct inhibition of the APC/C complex_Homo sapiens_R-HSA-141430	2016-06-20	0.00117976	0.0121708	0.0737531	-0.325156	CDC20;UBE2C;BUB1B;BUB3;ANAPC1;MAD2L1
Polo-like kinase mediated events_Homo sapiens_R-HSA-156711	2016-06-16	0.000449964	0.00561621	0.0810066	-0.419784	CCNB2;CENPF;CCNB1;PLK1;FOXM1;CDC25C
Transport of Ribonucleoproteins into the Host Nucleus_Homo sapiens_R-HSA-168271	2016-06-30	0.00666146	0.0474277	0.218089	-0.664854	NUP93;NUP107;NUP133;NUP188;NUP85;NUP37
Regulation of Glucokinase by Glucokinase Regulatory Protein_Homo sapiens_R-HSA-170822	2016-06-30	0.00666146	0.0474277	0.23369	-0.712414	NUP93;NUP107;NUP133;NUP188;NUP85;NUP37
Polymerase switching_Homo sapiens_R-HSA-69091	2016-06-14	0.000253636	0.00371632	0.162182	-0.907413	POLD3;PRIM2;RFC3;PCNA;RFC4;PRIM1
Leading Strand Synthesis_Homo sapiens_R-HSA-69109	2016-06-14	0.000253636	0.00371632	0.196081	-1.09708	POLD3;PRIM2;RFC3;PCNA;RFC4;PRIM1
Removal of the Flap Intermediate_Homo sapiens_R-HSA-69166	2016-06-14	0.000253636	0.00371632	0.19676	-1.10087	POLD3;PRIM2;PCNA;PRIM1;RPA1;RPA2
Polymerase switching on the C-strand of the telomere_Homo sapiens_R-HSA-174411	2016-06-14	0.000253636	0.00371632	0.219628	-1.22882	POLD3;PRIM2;RFC3;PCNA;RFC4;PRIM1
Translesion synthesis by POLI_Homo sapiens_R-HSA-5656121	2016-05-17	0.00328507	0.0281458	0.446572	-1.59442	RFC3;PCNA;RFC4;RPA1;RPA2
Translesion synthesis by POLK_Homo sapiens_R-HSA-5655862	2016-05-17	0.00328507	0.0281458	0.478518	-1.70848	RFC3;PCNA;RFC4;RPA1;RPA2
Translesion synthesis by REV1_Homo sapiens_R-HSA-110312	2016-05-16	0.00264073	0.0236263	0.483261	-1.81	RFC3;PCNA;RFC4;RPA1;RPA2
Translesion Synthesis by POLH_Homo sapiens_R-HSA-110320	2016-05-19	0.00490026	0.0366975	0.557152	-1.84141	RFC3;PCNA;RFC4;RPA1;RPA2
Phosphorylation of the APC/C_Homo sapiens_R-HSA-176412	2016-05-19	0.00490026	0.0366975	0.837227	-2.76707	CCNB1;UBE2C;PLK1;CDK1;ANAPC1
TP53 Regulates Transcription of Genes Involved in G2 Cell Cycle Arrest_Homo sapiens_R-HSA-6804114	2016-05-18	0.00403524	0.0313817	1.13932	-3.94377	CCNB1;PCNA;CDK1;CDC25C;AURKA
Mismatch Repair_Homo sapiens_R-HSA-5358508	2016-05-15	0.00209314	0.0194144	1.23576	-4.87104	POLD3;PCNA;LIG1;RPA1;RPA2
Mitotic Telophase/Cytokinesis_Homo sapiens_R-HSA-68884	2016-05-13	0.00125213	0.0127869	1.15474	-5.03388	STAG2;PLK1;KIF23;KIF20A;SMC1A
Mismatch repair (MMR) directed by MSH2:MSH3 (MutSbeta)_Homo sapiens_R-HSA-5358606	2016-05-14	0.00163327	0.0158772	1.2764	-5.28797	POLD3;PCNA;LIG1;RPA1;RPA2
Mismatch repair (MMR) directed by MSH2:MSH6 (MutSalpha)_Homo sapiens_R-HSA-5358565	2016-05-14	0.00163327	0.0158772	1.31419	-5.4445	POLD3;PCNA;LIG1;RPA1;RPA2
Recruitment of NuMA to mitotic centrosomes_Homo sapiens_R-HSA-380320	2016-05-11	0.000691122	0.00759483	1.40626	-6.86293	NEDD1;CCNB1;TUBGCP2;CDK1;TUBG1
Processive synthesis on the C-strand of the telomere_Homo sapiens_R-HSA-174414	2016-05-11	0.000691122	0.00759483	1.64003	-8.00381	POLD3;PCNA;LIG1;RPA1;RPA2
Phosphorylation of Emi1_Homo sapiens_R-HSA-176417	2016-05-06	8.92351e-05	0.00155546	1.25385	-8.10739	CDC20;CCNB1;PLK1;CDK1;FBXO5
Activation of NIMA Kinases NEK9, NEK6, NEK7_Homo sapiens_R-HSA-2980767	2016-05-07	0.000146978	0.00247659	1.5913	-9.54917	CCNB2;CCNB1;NEK6;PLK1;CDK1
Establishment of Sister Chromatid Cohesion_Homo sapiens_R-HSA-2468052	2016-04-10	0.0035305	0.0285547	3.03646	-10.7975	STAG2;CDCA5;ESCO2;SMC1A
Removal of the Flap Intermediate from the C-strand_Homo sapiens_R-HSA-174437	2016-04-10	0.0035305	0.0285547	4.17297	-14.8388	POLD3;PCNA;RPA1;RPA2
E2F-enabled inhibition of pre-replication complex formation_Homo sapiens_R-HSA-113507	2016-04-10	0.0035305	0.0285547	4.37454	-15.5556	ORC4;CCNB1;ORC3;CDK1
G2/M DNA replication checkpoint_Homo sapiens_R-HSA-69478	2016-03-05	0.00509075	0.0378437	5.33063	-17.454	CCNB2;CCNB1;CDK1
Cyclin B2 mediated events_Homo sapiens_R-HSA-157881	2016-04-05	0.000538084	0.00657743	5.06332	-25.4387	CCNB2;CDK1;CDC25C;CDC25B
