# Supplementary material for: Extracellular matrix-inducing Sox9 promotes both basal progenitor proliferation and gliogenesis in developing neocortex
Source: eLife. 2020 Mar 19;9:e49808. doi: 10.7554/eLife.49808 (PMC7105383; doi:10.7554/eLife.49808)
Supplement: Supplementary file 3. — Tab-1 (ECM-related genes): List of all genes that were enriched for ECM related terms (Figure 5C,D and E) in GO term and KEGG pathway analyses. Columns in each tab denote the following information consecutively: A: Ensemble gene ID, B: Gene name, C: Description, D: Average count for Sox9 sample, E: Average count for control sample, G: Logarithmic fold change (FC) of counts between Sox9 and control samples, J: p-value, K: adjusted p-value, W: Average FPKM value for control sample, X: Average FPKM value for Sox9 sample, Y: Fold change (FC) between average FPKM values of Sox9 and control samples, Z: Logarithmic fold change (FC) between average FPKM values of Sox9 and control samples. [file elife-49808-supp3.xlsx]

## Sheet: ECM-related genes
Ensembl gene ID	Gene name	Description	Sox9 (Avg count)	Ctrl (Avg count)	baseMean	Fold change (Avg count, Sox9/Cntrl, log2)	lfcSE	stat	p-value	p-adjusted				ctrl_high_1	ctrl_high_2	ctrl_high_4	sox9_high_1	sox9_high_2	sox9_high_3	sox9_high_4		Cntrl (Avg FPKM)	Sox9 (Avg FPKM)	Fold change (Avg FPKM, Sox9/Cntrl)	Fold change (Avg FPKM, Sox9/Cntrl, log2)
ENSMUSG00000030905	Crym	crystallin, mu [Source:MGI Symbol;Acc:MGI:102675]	1144.16	1013.89	1069.72	2.0818	0.470887	4.42101	9.82396e-06	0.000287938				957.561	747.939	1340.83	3125.08	2339.84	2473.84	2592.19		1015.44	2632.74	2.5927	1.37445
ENSMUSG00000031302	Nlgn3	neuroligin 3 [Source:MGI Symbol;Acc:MGI:2444609]	2322.86	2098	2194.37	0.482509	0.138152	3.49258	0.000478377	0.00603344				117.262	170.53	190.042	306.115	258.855	262.349	351.024		159.278	294.586	1.84951	0.887141
ENSMUSG00000022893	Adamts1	a disintegrin-like and metallopeptidase (reprolysin type) with thrombospondin type 1 motif, 1 [Source:MGI Symbol;Acc:MGI:109249]	251.698	300.382	279.518	0.775991	0.213573	3.63338	0.000279729	0.00411232				119.696	168.022	152.038	265.471	225.197	237.58	286.218		146.585	253.617	1.73016	0.790908
ENSMUSG00000074037	Mc1r	melanocortin 1 receptor [Source:MGI Symbol;Acc:MGI:99456]	94.6302	47.1974	67.5257	1.30287	0.376225	3.463	0.000534197	0.00649574				64.501	48.649	80.508	205.277	153	171.728	179.502		64.5527	177.377	2.74778	1.45827
ENSMUSG00000024173	Tpsab1	tryptase alpha/beta 1 [Source:MGI Symbol;Acc:MGI:96943]	39.8538	30.4397	34.4743	2.86238	0.413874	6.91607	4.64352e-12	8.0148e-10				11.553	10.804	14.207	70.277	57.949	41.157	45.742		12.188	53.7812	4.41264	2.14164
ENSMUSG00000069706	Taar5	trace amine-associated receptor 5 [Source:MGI Symbol;Acc:MGI:2685073]	16.3258	7.30513	11.1711	1.5916	0.469269	3.39166	0.000694712	0.00785366				16.79	11.271	19.096	48.866	36.98	45.177	40.574		15.719	42.8992	2.72913	1.44844
ENSMUSG00000032060	Cryab	crystallin, alpha B [Source:MGI Symbol;Acc:MGI:88516]	51.1703	35.4845	42.207	2.33048	0.378386	6.15901	7.3201e-10	7.4986e-08				10.275	9.46	14.471	35.911	26.805	28.742	28.927		11.402	30.0962	2.63956	1.4003
ENSMUSG00000048349	Pou4f1	POU domain, class 4, transcription factor 1 [Source:MGI Symbol;Acc:MGI:102525]	87.4287	69.5254	77.1983	1.21741	0.327919	3.71254	0.000205192	0.00325287				21.053	9.135	10.154	48.429	21.966	19.433	28.796		13.4473	29.656	2.20534	1.141
ENSMUSG00000044199	S1pr4	sphingosine-1-phosphate receptor 4 [Source:MGI Symbol;Acc:MGI:1333809]	36.1305	16.1632	24.7206	1.55828	0.45398	3.43249	0.000598055	0.00707382				8.395	6.714	9.571	28.235	18.776	21.525	23.422		8.22667	22.9895	2.79451	1.4826
ENSMUSG00000054263	Lifr	leukemia inhibitory factor receptor [Source:MGI Symbol;Acc:MGI:96788]	851.085	664.565	744.502	0.836833	0.173728	4.8169	1.45804e-06	5.81997e-05				1.569	1.465	6.464	23.348	12.172	14.487	31.048		3.166	20.2637	6.40043	2.67817
ENSMUSG00000041347	Bdkrb1	bradykinin receptor, beta 1 [Source:MGI Symbol;Acc:MGI:88144]	26.5672	11.5449	17.983	1.7698	0.454235	3.89621	9.77098e-05	0.00180875				0.225	0.01	0.158	21.657	17.573	7.279	13.425		0.131	14.9835	114.378	6.83766
ENSMUSG00000042262	Ccr8	chemokine (C-C motif) receptor 8 [Source:MGI Symbol;Acc:MGI:1201402]	18.8853	15.7662	17.1029	1.89975	0.462379	4.10864	3.98001e-05	0.000887456				0.181	5.279	1.803	3.302	22.129	27.798	5.919		2.421	14.787	6.10781	2.61065
ENSMUSG00000030336	Cd27	CD27 antigen [Source:MGI Symbol;Acc:MGI:88326]	38.6287	17.7131	26.677	2.31339	0.430056	5.37926	7.47906e-08	4.45422e-06				0.213	3.161	1.181	3.152	20.218	26.889	4.746		1.51833	13.7513	9.05681	3.179
ENSMUSG00000021614	Vcan	versican [Source:MGI Symbol;Acc:MGI:102889]	740.009	524.401	616.804	1.65002	0.173786	9.49457	2.21119e-21	1.64875e-18				4.56	3.918	6.313	15.627	11.633	13.46	12.941		4.93033	13.4153	2.72096	1.44412
ENSMUSG00000034320	Slc26a2	solute carrier family 26 (sulfate transporter), member 2 [Source:MGI Symbol;Acc:MGI:892977]	147.097	95.5042	117.615	1.68316	0.270596	6.2202	4.96525e-10	5.25894e-08				7.873	7.024	5.764	13.543	13.071	11.37	9.29		6.887	11.8185	1.71606	0.779099
ENSMUSG00000022425	Enpp2	ectonucleotide pyrophosphatase/phosphodiesterase 2 [Source:MGI Symbol;Acc:MGI:1321390]	441.534	452.486	447.792	3.55257	0.196268	18.1006	3.15363e-73	5.87868e-69				1.799	1.373	1.45	16.303	10.958	5.133	13.092		1.54067	11.3715	7.3809	2.8838
ENSMUSG00000051457	Spn	sialophorin [Source:MGI Symbol;Acc:MGI:98384]	34.5677	27.3414	30.4384	1.42249	0.417905	3.40385	0.000664435	0.00760795				3.826	2.789	4.054	12.63	8.984	10.524	10.307		3.55633	10.6113	2.98376	1.57713
ENSMUSG00000025386	Pde6g	phosphodiesterase 6G, cGMP-specific, rod, gamma [Source:MGI Symbol;Acc:MGI:97526]	40.4085	22.3453	30.0867	1.8144	0.405897	4.47009	7.81873e-06	0.000236605				3.368	2.92	1.929	9.692	8.831	16.613	5.776		2.739	10.228	3.73421	1.9008
ENSMUSG00000023979	Guca1b	guanylate cyclase activator 1B [Source:MGI Symbol;Acc:MGI:1194489]	57.8671	25.2908	39.252	1.47909	0.376249	3.93115	8.45393e-05	0.00161796				6.893	4.581	5.141	10.755	10.533	9.277	10.082		5.53833	10.1617	1.8348	0.875625
ENSMUSG00000032773	Chrm1	cholinergic receptor, muscarinic 1, CNS [Source:MGI Symbol;Acc:MGI:88396]	122.837	102.781	111.376	1.36212	0.271259	5.02147	5.12767e-07	2.37773e-05				0.276	6.846	0.673	3.265	9.863	17.917	6.652		2.59833	9.42425	3.62704	1.85879
ENSMUSG00000021835	Bmp4	bone morphogenetic protein 4 [Source:MGI Symbol;Acc:MGI:88180]	34.7172	33.1748	33.8358	2.29118	0.398342	5.7518	8.83004e-09	6.97461e-07				1.627	2.923	2.357	11.244	5.472	9.869	8.956		2.30233	8.88525	3.85924	1.94832
ENSMUSG00000024803	Ankrd1	ankyrin repeat domain 1 (cardiac muscle) [Source:MGI Symbol;Acc:MGI:1097717]	44.9992	33.1646	38.2366	1.58504	0.376491	4.21003	2.55335e-05	0.000627929				1.781	0.622	2.082	10.838	6.107	7.148	8.289		1.495	8.0955	5.41505	2.43697
ENSMUSG00000019055	Plod1	procollagen-lysine, 2-oxoglutarate 5-dioxygenase 1 [Source:MGI Symbol;Acc:MGI:99907]	158.541	120.184	136.623	1.49934	0.270322	5.54651	2.91429e-08	1.98994e-06				0	0.644	0.662	8.519	5.269	4.57	10.637		0.435333	7.24875	16.651	4.05754
ENSMUSG00000022894	Adamts5	a disintegrin-like and metallopeptidase (reprolysin type) with thrombospondin type 1 motif, 5 (aggrecanase-2) [Source:MGI Symbol;Acc:MGI:1346321]	208.763	178.643	191.552	2.16515	0.234866	9.21867	3.00819e-20	1.64929e-17				0.672	1.268	2.086	7.717	3.335	7.334	8.098		1.342	6.621	4.93368	2.30266
ENSMUSG00000004948	Zp3	zona pellucida glycoprotein 3 [Source:MGI Symbol;Acc:MGI:99215]	40.2762	25.4058	31.7788	2.24388	0.409319	5.482	4.20546e-08	2.7315e-06				3.176	2.066	2.68	7.033	6.663	5.561	5.352		2.64067	6.15225	2.32981	1.22021
ENSMUSG00000051043	Gprc5c	G protein-coupled receptor, family C, group 5, member C [Source:MGI Symbol;Acc:MGI:1917605]	90.1283	77.4619	82.8903	2.32654	0.317796	7.32085	2.46413e-13	5.21976e-11				0.173	0.279	0.319	7.11	7.542	1.795	6.303		0.257	5.6875	22.1304	4.46795
ENSMUSG00000058620	Adra2b	adrenergic receptor, alpha 2b [Source:MGI Symbol;Acc:MGI:87935]	21.0704	9.01806	14.1834	2.10355	0.46394	4.5341	5.78491e-06	0.000185605				0.059	1.474	0.065	1.019	6.396	12.038	1.228		0.532667	5.17025	9.70635	3.27893
ENSMUSG00000075307	Klhl41	kelch-like 41 [Source:MGI Symbol;Acc:MGI:2683854]	60.9714	41.4915	49.84	1.74088	0.353452	4.92535	8.42074e-07	3.65049e-05				0.884	0.866	0.534	8.94	4.162	6.486	1.052		0.761333	5.16	6.77758	2.76077
ENSMUSG00000070337	Gpr179	G protein-coupled receptor 179 [Source:MGI Symbol;Acc:MGI:2443409]	78.9599	56.9995	66.4111	2.00746	0.398298	5.0401	4.65299e-07	2.17931e-05				0.488	0.57	0.974	5.943	3.552	5.464	5.369		0.677333	5.082	7.50295	2.90746
ENSMUSG00000039084	Chad	chondroadherin [Source:MGI Symbol;Acc:MGI:1096866]	21.8171	4.55175	11.9512	1.83636	0.470415	3.90371	9.47293e-05	0.00176206				0.573	0.237	0.244	7.585	3.74	7.115	1.384		0.351333	4.956	14.1063	3.81826
ENSMUSG00000020912	Krt12	keratin 12 [Source:MGI Symbol;Acc:MGI:96687]	25.4023	16.7075	20.4338	1.44641	0.437538	3.3058	0.000947051	0.00975358				1.747	2.17	2.388	2.827	4.69	4.962	6.47		2.10167	4.73725	2.25404	1.17252
ENSMUSG00000056091	St3gal5	ST3 beta-galactoside alpha-2,3-sialyltransferase 5 [Source:MGI Symbol;Acc:MGI:1339963]	236.223	201.104	216.155	0.80216	0.231934	3.45857	0.000543058	0.00655644				1.557	1.079	1.205	5.266	3.479	3.322	5.26		1.28033	4.33175	3.3833	1.75843
ENSMUSG00000032584	Mst1r	macrophage stimulating 1 receptor (c-met-related tyrosine kinase) [Source:MGI Symbol;Acc:MGI:99614]	46.4333	40.6235	43.1134	1.40771	0.386172	3.64529	0.000267092	0.00396407				0.372	0.64	0.961	6.569	2.901	3.992	3.567		0.657667	4.25725	6.47326	2.69449
ENSMUSG00000030159	Clec1b	C-type lectin domain family 1, member b [Source:MGI Symbol;Acc:MGI:1913287]	49.7877	28.1319	37.413	1.39347	0.399328	3.48954	0.00048386	0.00608203				1.464	1.148	2.124	5.018	3.59	3.504	3.94		1.57867	4.013	2.54202	1.34597
ENSMUSG00000042367	Gjb3	gap junction protein, beta 3 [Source:MGI Symbol;Acc:MGI:95721]	19.8921	10.6211	14.5944	2.0586	0.466039	4.41724	9.99696e-06	0.000291177				0.273	0.572	0.403	3.956	2.508	3.996	5.48		0.416	3.985	9.57933	3.25992
ENSMUSG00000026432	Avpr1b	arginine vasopressin receptor 1B [Source:MGI Symbol;Acc:MGI:1347010]	45.4964	28.3287	35.6863	1.8804	0.400454	4.69565	2.65754e-06	9.69456e-05				2.525	2.075	1.451	4.7	3.682	3.179	3.492		2.017	3.76325	1.86577	0.899768
ENSMUSG00000061808	Ttr	transthyretin [Source:MGI Symbol;Acc:MGI:98865]	26.1739	21.2673	23.3702	2.48816	0.449386	5.53681	3.08031e-08	2.07293e-06				0.769	0.106	0.852	4.216	2.803	3.099	3.561		0.575667	3.41975	5.9405	2.57059
ENSMUSG00000020892	Aloxe3	arachidonate lipoxygenase 3 [Source:MGI Symbol;Acc:MGI:1345140]	84.6022	44.0577	61.4339	1.68679	0.34828	4.84321	1.27757e-06	5.23411e-05				0.522	1.534	0.499	4.207	1.726	4.032	3.54		0.851667	3.37625	3.96429	1.98706
ENSMUSG00000057132	Rpgrip1	retinitis pigmentosa GTPase regulator interacting protein 1 [Source:MGI Symbol;Acc:MGI:1932134]	172.219	144.933	156.627	0.986673	0.24395	4.04457	5.24198e-05	0.00110663				0.372	0.25	0.72	5.167	1.945	2.499	3.89		0.447333	3.37525	7.54527	2.91557
ENSMUSG00000049103	Ccr2	chemokine (C-C motif) receptor 2 [Source:MGI Symbol;Acc:MGI:106185]	37.1623	24.4085	29.8744	1.48756	0.406829	3.65647	0.000255711	0.00385033				0.186	0.134	0.124	3.95	1.642	2.69	4.582		0.148	3.216	21.7297	4.4416
ENSMUSG00000024935	Slc1a1	solute carrier family 1 (neuronal/epithelial high affinity glutamate transporter, system Xag), member 1 [Source:MGI Symbol;Acc:MGI:105083]	210.333	255.353	236.059	0.848471	0.245594	3.45478	0.000550749	0.00664499				0.643	0.66	0.865	2.874	2.024	4.358	3.606		0.722667	3.2155	4.44949	2.15364
ENSMUSG00000026208	Des	desmin [Source:MGI Symbol;Acc:MGI:94885]	22.0159	14.3094	17.6122	1.92455	0.4512	4.2654	1.99543e-05	0.000518785				0.245	0.293	0.543	3.832	1.439	2.659	4.915		0.360333	3.21125	8.91189	3.15573
ENSMUSG00000026668	Ucma	upper zone of growth plate and cartilage matrix associated [Source:MGI Symbol;Acc:MGI:1915777]	20.5514	21.316	20.9883	1.71221	0.43488	3.93721	8.24351e-05	0.00158444				0.103	0.155	0.229	3.894	2.81	3.416	2.075		0.162333	3.04875	18.7808	4.23119
ENSMUSG00000027570	Col9a3	collagen, type IX, alpha 3 [Source:MGI Symbol;Acc:MGI:894686]	57.9955	55.7348	56.7037	1.48929	0.342845	4.34391	1.39969e-05	0.000385971				0.338	0.351	0.461	3.259	1.033	3.798	3.272		0.383333	2.8405	7.41	2.88947
ENSMUSG00000021367	Edn1	endothelin 1 [Source:MGI Symbol;Acc:MGI:95283]	22.275	7.10833	13.6083	1.61954	0.465232	3.48114	0.000499287	0.00617598				0.894	0.519	0.553	2.24	2.55	3.575	2.546		0.655333	2.72775	4.16239	2.05741
ENSMUSG00000050395	Tnfsf15	tumor necrosis factor (ligand) superfamily, member 15 [Source:MGI Symbol;Acc:MGI:2180140]	51.5404	26.721	37.3579	1.90087	0.393355	4.83245	1.34863e-06	5.47709e-05				1.399	0.89	1.222	2.989	2	2.469	2.7		1.17033	2.5395	2.16989	1.11762
ENSMUSG00000074028	Slc22a13	solute carrier family 22 (organic cation transporter), member 13 [Source:MGI Symbol;Acc:MGI:2143107]	40.2003	26.06	32.1202	2.21698	0.403596	5.49307	3.95009e-08	2.62032e-06				0.494	0.598	0.575	2.94	2.428	1.921	2.462		0.555667	2.43775	4.38707	2.13326
ENSMUSG00000025172	Ankrd2	ankyrin repeat domain 2 (stretch responsive muscle) [Source:MGI Symbol;Acc:MGI:1861447]	23.5749	11.7059	16.7926	2.17766	0.46151	4.71856	2.37519e-06	8.81992e-05				0.134	0.362	0.535	2.895	1.776	3.043	1.968		0.343667	2.4205	7.04316	2.81622
ENSMUSG00000027470	Mylk2	myosin, light polypeptide kinase 2, skeletal muscle [Source:MGI Symbol;Acc:MGI:2139434]	30.4069	13.8194	20.9283	2.1058	0.439087	4.79584	1.61991e-06	6.32728e-05				0.426	0.076	0.094	3.258	1.784	3.016	1.115		0.198667	2.29325	11.5432	3.52897
ENSMUSG00000026271	Gpr35	G protein-coupled receptor 35 [Source:MGI Symbol;Acc:MGI:1929509]	93.6158	50.7546	69.1237	1.65635	0.337853	4.90256	9.45936e-07	4.00833e-05				0	0.368	0.076	2.613	2.108	2.419	1.967		0.148	2.27675	15.3834	3.94331
ENSMUSG00000020911	Krt19	keratin 19 [Source:MGI Symbol;Acc:MGI:96693]	19.8028	8.29397	13.2263	1.96772	0.468951	4.196	2.71667e-05	0.00065768				0.379	0.16	0.173	4.297	2.405	0.757	1.399		0.237333	2.2145	9.33076	3.22199
ENSMUSG00000046618	Olfml2a	olfactomedin-like 2A [Source:MGI Symbol;Acc:MGI:2444741]	92.5681	23.7573	53.2476	2.98866	0.397049	7.5272	5.18403e-14	1.38051e-11				0.144	0.233	0.48	2.611	0.987	2.658	2.495		0.285667	2.18775	7.6584	2.93704
ENSMUSG00000074109	Mrgprx2	MAS-related GPR, member X2 [Source:MGI Symbol;Acc:MGI:3588270]	40.9174	44.567	43.0029	1.25053	0.36646	3.41245	0.000643814	0.00743845				0	0.162	0.2	1.098	1.592	1.79	4.017		0.120667	2.12425	17.6043	4.13785
ENSMUSG00000024673	Ms4a1	membrane-spanning 4-domains, subfamily A, member 1 [Source:MGI Symbol;Acc:MGI:88321]	39.8303	27.0378	32.5203	1.32287	0.390914	3.38405	0.000714256	0.00801705				0.163	0.146	0.451	3.68	1.839	2.421	0.533		0.253333	2.11825	8.36151	3.06376
ENSMUSG00000071713	Csf2rb	colony stimulating factor 2 receptor, beta, low-affinity (granulocyte-macrophage) [Source:MGI Symbol;Acc:MGI:1339759]	51.9186	36.3262	43.0087	2.34211	0.374634	6.25172	4.05948e-10	4.37415e-08				0.409	0.968	0.605	2.8	1.82	1.392	2.429		0.660667	2.11025	3.19412	1.67542
ENSMUSG00000033453	Adamts15	a disintegrin-like and metallopeptidase (reprolysin type) with thrombospondin type 1 motif, 15 [Source:MGI Symbol;Acc:MGI:2449569]	54.783	29.098	40.1058	2.31271	0.39055	5.92168	3.18677e-09	2.82879e-07				0.351	0.157	0.485	2.286	1.014	2.359	2.753		0.331	2.103	6.35347	2.66755
ENSMUSG00000024109	Nrxn1	neurexin I [Source:MGI Symbol;Acc:MGI:1096391]	2629.04	2546.86	2582.08	0.493106	0.141128	3.49404	0.000475773	0.00600873				0	0	0	3.752	2.508	0.722	1.335		0	2.07925	#DIV/0!	#DIV/0!
ENSMUSG00000000753	Serpinf1	serine (or cysteine) peptidase inhibitor, clade F, member 1 [Source:MGI Symbol;Acc:MGI:108080]	25.4574	17.8564	21.114	2.16039	0.44067	4.90253	9.46122e-07	4.00833e-05				0.181	0.195	0.44	3.331	2.231	2.406	0.284		0.272	2.063	7.58456	2.92307
ENSMUSG00000016995	Matn4	matrilin 4 [Source:MGI Symbol;Acc:MGI:1328314]	35.2757	20.8924	27.0567	1.66671	0.422782	3.94224	8.07248e-05	0.00156261				0.209	0.41	0.388	3.121	2.393	0.778	1.705		0.335667	1.99925	5.95606	2.57436
ENSMUSG00000045775	Slc16a5	solute carrier family 16 (monocarboxylic acid transporters), member 5 [Source:MGI Symbol;Acc:MGI:2443515]	23.7039	15.9727	19.2861	1.91324	0.456191	4.19395	2.74141e-05	0.00066281				0.612	0.591	0.696	2.264	1.533	2.196	1.899		0.633	1.973	3.1169	1.64011
ENSMUSG00000005465	Il27ra	interleukin 27 receptor, alpha [Source:MGI Symbol;Acc:MGI:1355318]	25.4265	17.6353	20.9744	1.63354	0.431128	3.78898	0.000151264	0.00257274				0.061	0	0.34	1.281	1.557	1.74	3.055		0.133667	1.90825	14.2762	3.83554
ENSMUSG00000038224	Serpinf2	serine (or cysteine) peptidase inhibitor, clade F, member 2 [Source:MGI Symbol;Acc:MGI:107173]	15.9848	9.7546	12.4247	1.7557	0.468514	3.74739	0.000178681	0.00292432				0.689	0.619	0.524	3.054	1.474	1.761	1.097		0.610667	1.8465	3.02374	1.59634
ENSMUSG00000040061	Plcb2	phospholipase C, beta 2 [Source:MGI Symbol;Acc:MGI:107465]	45.2814	31.6697	37.5033	1.36266	0.400298	3.40411	0.000663798	0.00760532				0.195	0	0.339	1.5	0.859	2.365	2.477		0.178	1.80025	10.1138	3.33825
ENSMUSG00000070687	Htr1d	5-hydroxytryptamine (serotonin) receptor 1D [Source:MGI Symbol;Acc:MGI:96276]	47.6335	24.2361	34.2636	1.93458	0.407419	4.74837	2.05062e-06	7.75368e-05				0.16	0.115	0.106	2.615	0.988	3.173	0.419		0.127	1.79875	14.1634	3.82409
ENSMUSG00000024087	Cyp1b1	cytochrome P450, family 1, subfamily b, polypeptide 1 [Source:MGI Symbol;Acc:MGI:88590]	22.9997	4.05657	12.1751	1.69918	0.470653	3.61026	0.000305891	0.00440659				0.395	0.307	0.146	2.838	1.451	1.827	1.034		0.282667	1.7875	6.3237	2.66077
ENSMUSG00000043110	Lrrn4	leucine rich repeat neuronal 4 [Source:MGI Symbol;Acc:MGI:2445154]	20.5766	19.4268	19.9196	2.08963	0.442619	4.72106	2.34622e-06	8.72972e-05				0.408	0.506	0.66	1.958	1.25	1.329	2.499		0.524667	1.759	3.3526	1.74528
ENSMUSG00000001506	Col1a1	collagen, type I, alpha 1 [Source:MGI Symbol;Acc:MGI:88467]	33.1456	22.9904	27.3427	1.87783	0.415542	4.51898	6.21369e-06	0.000195358				0.275	0.213	0.207	2.823	1.253	0.778	2.092		0.231667	1.7365	7.49568	2.90606
ENSMUSG00000049555	Tmie	transmembrane inner ear [Source:MGI Symbol;Acc:MGI:2159400]	35.9163	11.0088	21.6834	1.89651	0.45616	4.15754	3.21686e-05	0.000753336				0.725	0.504	0.589	2.057	1.971	1.398	1.462		0.606	1.722	2.84158	1.5067
ENSMUSG00000012889	Podnl1	podocan-like 1 [Source:MGI Symbol;Acc:MGI:2685352]	16.8905	3.5382	9.26062	1.65627	0.471338	3.51397	0.000441455	0.00570242				0.036	0.082	0.053	2.791	1.734	0.53	1.741		0.057	1.699	29.807	4.89758
ENSMUSG00000038805	Six3	sine oculis-related homeobox 3 [Source:MGI Symbol;Acc:MGI:102764]	34.9626	15.2059	23.6731	1.74805	0.433252	4.03472	5.46686e-05	0.00114027				0.793	1.049	0.549	2.144	1.779	1.416	1.443		0.797	1.6955	2.12735	1.08906
ENSMUSG00000042254	Cilp	cartilage intermediate layer protein, nucleotide pyrophosphohydrolase [Source:MGI Symbol;Acc:MGI:2444507]	34.6901	14.5645	23.1897	1.68742	0.433029	3.89678	9.74789e-05	0.00180627				0.305	0.504	0.589	2.107	1.933	0.949	1.702		0.466	1.67275	3.58959	1.84382
ENSMUSG00000018166	Erbb3	erb-b2 receptor tyrosine kinase 3 [Source:MGI Symbol;Acc:MGI:95411]	39.7624	29.1818	33.7163	1.40981	0.402044	3.50661	0.000453857	0.00581068				0.44	0.376	0.268	2.105	0.922	2.182	1.21		0.361333	1.60475	4.44119	2.15095
ENSMUSG00000024650	Slc22a6	solute carrier family 22 (organic anion transporter), member 6 [Source:MGI Symbol;Acc:MGI:892001]	18.3476	9.92014	13.5319	2.0143	0.466097	4.32164	1.54872e-05	0.000419009				0.709	0.569	0.782	1.309	1.855	1.778	1.447		0.686667	1.59725	2.32609	1.21791
ENSMUSG00000042286	Stab1	stabilin 1 [Source:MGI Symbol;Acc:MGI:2178742]	43.5692	36.1009	39.3016	2.48641	0.392504	6.33473	2.37758e-10	2.71905e-08				0.184	0.198	0.082	2.561	0.609	1.669	1.542		0.154667	1.59525	10.3141	3.36655
ENSMUSG00000029859	Epha1	Eph receptor A1 [Source:MGI Symbol;Acc:MGI:107381]	20.4071	20.2191	20.2997	1.76789	0.437694	4.03911	5.36554e-05	0.00112507				0.622	0.279	0.404	2.913	1.162	1.378	0.884		0.435	1.58425	3.64195	1.86471
ENSMUSG00000012282	Wnt8a	wingless-type MMTV integration site family, member 8A [Source:MGI Symbol;Acc:MGI:107924]	13.5528	2.26322	7.10163	1.61789	0.463834	3.48808	0.000486508	0.00609885				0.147	0.176	0	2.042	1.133	1.248	1.409		0.107667	1.458	13.5418	3.75935
ENSMUSG00000036856	Wnt4	wingless-type MMTV integration site family, member 4 [Source:MGI Symbol;Acc:MGI:98957]	49.587	16.5257	30.6948	1.51624	0.426377	3.5561	0.000376399	0.00516675				0.079	0.283	0.369	2.224	0.976	1.067	1.491		0.243667	1.4395	5.90766	2.56259
ENSMUSG00000013936	Myl2	myosin, light polypeptide 2, regulatory, cardiac, slow [Source:MGI Symbol;Acc:MGI:97272]	16.5641	16.7545	16.6729	1.69756	0.449906	3.77313	0.000161211	0.00270978				0.222	0.094	0.297	1.624	0.991	1.588	1.528		0.204333	1.43275	7.01183	2.80979
ENSMUSG00000057003	Myh4	myosin, heavy polypeptide 4, skeletal muscle [Source:MGI Symbol;Acc:MGI:1339713]	42.5709	18.3466	28.7284	2.13632	0.417576	5.11601	3.12068e-07	1.53896e-05				0.125	0.18	0.444	2.049	0.553	1.563	1.543		0.249667	1.427	5.71562	2.51491
ENSMUSG00000068699	Flnc	filamin C, gamma [Source:MGI Symbol;Acc:MGI:95557]	51.8491	32.3355	40.6985	1.31604	0.371364	3.54381	0.000394386	0.0053158				0.19	0.114	0.211	3.024	0.7	0.216	1.728		0.171667	1.417	8.25437	3.04516
ENSMUSG00000023978	Prph2	peripherin 2 [Source:MGI Symbol;Acc:MGI:102791]	24.7825	9.39817	15.9915	2.32806	0.462288	5.03596	4.75456e-07	2.2213e-05				0.218	0.155	0.5	1.438	1.268	1.182	1.732		0.291	1.405	4.82818	2.27148
ENSMUSG00000027071	P2rx3	purinergic receptor P2X, ligand-gated ion channel, 3 [Source:MGI Symbol;Acc:MGI:1097160]	55.2678	46.2886	50.1368	1.49699	0.352568	4.24596	2.17656e-05	0.000555799				0.359	0.258	0.509	1.424	0.824	1.812	1.355		0.375333	1.35375	3.60679	1.85072
ENSMUSG00000030577	Cd22	CD22 antigen [Source:MGI Symbol;Acc:MGI:88322]	22.4725	14.0549	17.6625	1.60452	0.451196	3.55614	0.000376347	0.00516675				0	0.028	0.276	1.515	0.583	1.146	1.955		0.101333	1.29975	12.8265	3.68105
ENSMUSG00000069833	Ahnak	AHNAK nucleoprotein (desmoyokin) [Source:MGI Symbol;Acc:MGI:1316648]	114.007	117.151	115.804	1.42086	0.285957	4.9688	6.7367e-07	3.00248e-05				0.059	0.106	0.109	1.983	0.91	1.365	0.875		0.0913333	1.28325	14.0502	3.81252
ENSMUSG00000001827	Folr1	folate receptor 1 (adult) [Source:MGI Symbol;Acc:MGI:95568]	14.4808	12.5131	13.3564	1.72427	0.464442	3.71257	0.000205167	0.00325287				0	0.102	0.063	1.579	1.126	1.528	0.892		0.055	1.28125	23.2955	4.54198
ENSMUSG00000043924	Ncmap	noncompact myelin associated protein [Source:MGI Symbol;Acc:MGI:2444888]	39.5002	23.9898	30.6371	2.26045	0.420846	5.3712	7.82126e-08	4.57041e-06				0.473	0.326	0.215	2.094	1.09	0.842	1.057		0.338	1.27075	3.75962	1.91059
ENSMUSG00000002980	Bcam	basal cell adhesion molecule [Source:MGI Symbol;Acc:MGI:1929940]	25.0622	7.9675	15.2938	1.96058	0.463006	4.23446	2.29097e-05	0.000578671				0.12	0.161	0.166	2.495	1.021	1.313	0.235		0.149	1.266	8.49664	3.08689
ENSMUSG00000031551	Ido1	indoleamine 2,3-dioxygenase 1 [Source:MGI Symbol;Acc:MGI:96416]	14.7095	13.4637	13.9976	1.62487	0.461184	3.52325	0.000426291	0.0055782				0.162	0.021	0.077	1.325	0.713	1.995	0.967		0.0866667	1.25	14.4231	3.85031
ENSMUSG00000028876	Epha10	Eph receptor A10 [Source:MGI Symbol;Acc:MGI:3586824]	45.8949	40.3314	42.7157	1.55243	0.362959	4.27716	1.89295e-05	0.000493614				0.324	0.18	0.291	1.772	0.579	1.291	1.213		0.265	1.21375	4.58019	2.19541
ENSMUSG00000009292	Trpm2	transient receptor potential cation channel, subfamily M, member 2 [Source:MGI Symbol;Acc:MGI:1351901]	90.8462	54.4004	70.02	1.61012	0.317225	5.07564	3.86188e-07	1.84116e-05				0.217	0.583	0.292	1.607	1.356	0.598	1.253		0.364	1.2035	3.30632	1.72523
ENSMUSG00000026418	Tnni1	troponin I, skeletal, slow 1 [Source:MGI Symbol;Acc:MGI:105073]	41.5326	24.1976	31.6269	2.15333	0.415487	5.18267	2.18733e-07	1.13577e-05				0.157	0.316	0.113	1.561	1.474	0.518	1.26		0.195333	1.20325	6.15998	2.62293
ENSMUSG00000032489	Kif9	kinesin family member 9 [Source:MGI Symbol;Acc:MGI:1098237]	64.8117	47.8563	55.1229	1.25783	0.338185	3.71936	0.000199729	0.0031849				0.221	0.267	0.369	1.667	0.723	0.676	1.745		0.285667	1.20275	4.21033	2.07393
ENSMUSG00000061086	Myl4	myosin, light polypeptide 4 [Source:MGI Symbol;Acc:MGI:97267]	61.5912	34.3586	46.0297	1.70689	0.357621	4.7729	1.81593e-06	6.97954e-05				0.183	0.318	0.446	1.359	0.942	1.029	1.423		0.315667	1.18825	3.76426	1.91236
ENSMUSG00000031142	Cacna1f	calcium channel, voltage-dependent, alpha 1F subunit [Source:MGI Symbol;Acc:MGI:1859639]	36.7328	19.6937	26.9962	1.80798	0.413121	4.37638	1.20665e-05	0.000339768				0.364	0.5	0.447	1.076	0.933	1.616	1.126		0.437	1.18775	2.71796	1.44253
ENSMUSG00000024942	Capn1	calpain 1 [Source:MGI Symbol;Acc:MGI:88263]	32.1815	18.6754	24.4637	2.34457	0.43328	5.41122	6.25961e-08	3.84234e-06				0.249	0.178	0.337	1.469	0.733	1.406	1.112		0.254667	1.18	4.63351	2.2121
ENSMUSG00000030337	Vamp1	vesicle-associated membrane protein 1 [Source:MGI Symbol;Acc:MGI:1313276]	38.6394	24.839	30.7535	1.43999	0.393534	3.65911	0.000253092	0.00381706				0.083	0.073	0.08	1.695	1.041	0.373	1.526		0.0786667	1.15875	14.7299	3.88067
ENSMUSG00000042817	Flt3	FMS-like tyrosine kinase 3 [Source:MGI Symbol;Acc:MGI:95559]	69.2003	64.7431	66.6533	2.08739	0.356474	5.85565	4.7516e-09	4.01766e-07				0.343	0.374	0.208	1.391	0.954	1.538	0.705		0.308333	1.147	3.72	1.8953
ENSMUSG00000020154	Ptprb	protein tyrosine phosphatase, receptor type, B [Source:MGI Symbol;Acc:MGI:97809]	89.9306	77.9378	83.0776	2.10058	0.309775	6.78099	1.19359e-11	1.82374e-09				0.241	0.108	0.289	1.534	0.995	0.682	1.312		0.212667	1.13075	5.31701	2.41061
ENSMUSG00000049811	Fam161a	family with sequence similarity 161, member A [Source:MGI Symbol;Acc:MGI:1921123]	25.0302	20.4064	22.388	1.45841	0.43265	3.37088	0.000749295	0.00830911				0.086	0.145	0.211	1.208	0.682	1.334	1.295		0.147333	1.12975	7.66799	2.93885
ENSMUSG00000029468	P2rx7	purinergic receptor P2X, ligand-gated ion channel, 7 [Source:MGI Symbol;Acc:MGI:1339957]	62.3973	29.9152	43.8361	1.81404	0.363807	4.98627	6.15569e-07	2.79873e-05				0.623	0.49	0.537	1.634	1.058	0.771	1.009		0.55	1.118	2.03273	1.02342
ENSMUSG00000051747	Ttn	titin [Source:MGI Symbol;Acc:MGI:98864]	295.962	250.649	270.069	1.74701	0.237315	7.36155	1.81789e-13	3.98675e-11				0.112	0.034	0.083	1.626	0.66	1.855	0.294		0.0763333	1.10875	14.5251	3.86048
ENSMUSG00000030317	Timp4	tissue inhibitor of metalloproteinase 4 [Source:MGI Symbol;Acc:MGI:109125]	9.27736	8.22717	8.67725	1.60785	0.471077	3.41313	0.000642203	0.00743098				0.105	0.107	0.116	1.635	0.922	1.438	0.391		0.109333	1.0965	10.029	3.3261
ENSMUSG00000030830	Itgal	integrin alpha L [Source:MGI Symbol;Acc:MGI:96606]	40.4479	31.2916	35.2157	1.88855	0.396711	4.76052	1.93098e-06	7.34634e-05				0.198	0.205	0.287	0.981	0.588	1.49	1.277		0.23	1.084	4.71304	2.23666
ENSMUSG00000025964	Adam23	a disintegrin and metallopeptidase domain 23 [Source:MGI Symbol;Acc:MGI:1345162]	163.712	149.225	155.434	1.29715	0.268552	4.83015	1.3643e-06	5.51669e-05				0.191	0.182	0.092	1.265	0.539	0.625	1.78		0.155	1.05225	6.78871	2.76314
ENSMUSG00000048126	Col6a3	collagen, type VI, alpha 3 [Source:MGI Symbol;Acc:MGI:88461]	77.3626	60.3108	67.6187	2.08131	0.320915	6.48554	8.84163e-11	1.11363e-08				0.172	0.017	0.254	1.398	0.823	0.786	1.152		0.147667	1.03975	7.0412	2.81582
ENSMUSG00000002100	Mybpc3	myosin binding protein C, cardiac [Source:MGI Symbol;Acc:MGI:102844]	18.2584	12.6143	15.0332	1.58704	0.455745	3.4823	0.000497134	0.00616272				0.072	0.021	0.079	1.081	0.553	0.813	1.627		0.0573333	1.0185	17.7645	4.15093
ENSMUSG00000045731	Pnoc	prepronociceptin [Source:MGI Symbol;Acc:MGI:105308]	24.2531	16.2445	19.6768	1.79133	0.443313	4.04077	5.32752e-05	0.00112088				0.046	0.208	0.393	0.939	0.816	1.224	1.091		0.215667	1.0175	4.71793	2.23815
ENSMUSG00000032334	Loxl1	lysyl oxidase-like 1 [Source:MGI Symbol;Acc:MGI:106096]	29.3234	12.6805	19.8132	1.55179	0.454077	3.41746	0.000632076	0.00733677				0.117	0.171	0.146	1.323	0.823	1.161	0.728		0.144667	1.00875	6.97293	2.80176
ENSMUSG00000031980	Agt	angiotensinogen (serpin peptidase inhibitor, clade A, member 8) [Source:MGI Symbol;Acc:MGI:87963]	11.4417	8.1708	9.5726	1.60179	0.471417	3.39782	0.000679252	0.00773957				0.084	0.056	0.29	0.891	0.75	1.023	1.342		0.143333	1.0015	6.98721	2.80472
ENSMUSG00000021804	Rgr	retinal G protein coupled receptor [Source:MGI Symbol;Acc:MGI:1929473]	8.71259	8.19377	8.41612	1.57479	0.47084	3.34464	0.000823902	0.00892928				0.04	0.108	0	1.25	0.748	0.792	1.15		0.0493333	0.985	19.9662	4.31949
ENSMUSG00000020908	Myh3	myosin, heavy polypeptide 3, skeletal muscle, embryonic [Source:MGI Symbol;Acc:MGI:1339709]	25.3005	12.3796	17.9171	1.90994	0.450217	4.24227	2.21268e-05	0.000561942				0.216	0.194	0.189	1.307	0.653	1.452	0.507		0.199667	0.97975	4.90693	2.29482
ENSMUSG00000029231	Pdgfra	platelet derived growth factor receptor, alpha polypeptide [Source:MGI Symbol;Acc:MGI:97530]	36.7344	26.5296	30.9031	3.20219	0.428234	7.47766	7.5658e-14	1.90587e-11				0.497	0.207	0.203	1.508	0.884	0.679	0.844		0.302333	0.97875	3.23732	1.6948
ENSMUSG00000020178	Adora2a	adenosine A2a receptor [Source:MGI Symbol;Acc:MGI:99402]	19.1879	6.24473	11.7918	1.97123	0.470281	4.19161	2.76985e-05	0.000668502				0.06	0.076	0.147	0.86	0.652	0.957	1.422		0.0943333	0.97275	10.3118	3.36623
ENSMUSG00000060180	Myh13	myosin, heavy polypeptide 13, skeletal muscle [Source:MGI Symbol;Acc:MGI:1339967]	34.766	36.9668	36.0236	1.79289	0.38836	4.61656	3.90153e-06	0.000134433				0.151	0.1	0.255	1.365	0.577	0.797	1.079		0.168667	0.9545	5.65909	2.50057
ENSMUSG00000031502	Col4a1	collagen, type IV, alpha 1 [Source:MGI Symbol;Acc:MGI:88454]	105.291	75.7767	88.4256	1.4014	0.304395	4.60391	4.14639e-06	0.000141303				0.056	0.025	0.062	1.934	1.012	0.355	0.51		0.0476667	0.95275	19.9878	4.32105
ENSMUSG00000040998	Npnt	nephronectin [Source:MGI Symbol;Acc:MGI:2148811]	60.4702	39.7754	48.6446	1.81633	0.365321	4.97187	6.63114e-07	2.96429e-05				0.119	0.13	0.094	1.152	0.965	1.035	0.556		0.114333	0.927	8.10787	3.01932
ENSMUSG00000030834	Abcc6	ATP-binding cassette, sub-family C (CFTR/MRP), member 6 [Source:MGI Symbol;Acc:MGI:1351634]	48.04	26.808	35.9074	2.20756	0.395921	5.57575	2.46461e-08	1.7207e-06				0.203	0.221	0.263	1.075	0.635	0.9	1.087		0.229	0.92425	4.03603	2.01294
ENSMUSG00000019647	Sema6a	sema domain, transmembrane domain (TM), and cytoplasmic domain, (semaphorin) 6A [Source:MGI Symbol;Acc:MGI:1203727]	122.276	96.5373	107.568	1.14378	0.30256	3.78035	0.00015661	0.00263957				0.082	0.015	0.037	1.463	0.673	0.935	0.605		0.0446667	0.919	20.5746	4.36279
ENSMUSG00000001930	Vwf	Von Willebrand factor homolog [Source:MGI Symbol;Acc:MGI:98941]	111.713	80.2155	93.7142	2.19585	0.294213	7.46348	8.42651e-14	2.09438e-11				0.219	0.098	0.243	1.104	0.652	1.024	0.889		0.186667	0.91725	4.91384	2.29685
ENSMUSG00000025348	Itga7	integrin alpha 7 [Source:MGI Symbol;Acc:MGI:102700]	16.0294	15.3177	15.6227	1.76555	0.462366	3.81851	0.000134259	0.00233188				0.061	0.072	0.201	1.052	0.645	0.914	1.056		0.111333	0.91675	8.23428	3.04164
ENSMUSG00000020838	Slc6a4	solute carrier family 6 (neurotransmitter transporter, serotonin), member 4 [Source:MGI Symbol;Acc:MGI:96285]	30.8441	15.4204	22.0306	1.81433	0.430916	4.21041	2.54905e-05	0.000627699				0.195	0.261	0.265	1.338	0.891	0.642	0.753		0.240333	0.906	3.76976	1.91447
ENSMUSG00000038599	Capn8	calpain 8 [Source:MGI Symbol;Acc:MGI:2181366]	48.7839	37.1185	42.118	2.41168	0.376051	6.41317	1.42521e-10	1.71402e-08				0	0	0	1.083	1.098	0.647	0.761		0	0.89725	#DIV/0!	#DIV/0!
ENSMUSG00000022270	Fam134b	family with sequence similarity 134, member B [Source:MGI Symbol;Acc:MGI:1913520]	104.737	93.539	98.3383	0.960309	0.273257	3.5143	0.000440909	0.00570242				0.244	0.214	0.203	0.913	0.586	1.125	0.959		0.220333	0.89575	4.06543	2.02341
ENSMUSG00000023926	Rhag	Rhesus blood group-associated A glycoprotein [Source:MGI Symbol;Acc:MGI:1202713]	21.7437	15.4921	18.1714	1.70822	0.451153	3.78634	0.000152885	0.00259556				0.477	0.36	0.415	1.097	0.738	0.9	0.787		0.417333	0.8805	2.10982	1.07712
ENSMUSG00000020583	Matn3	matrilin 3 [Source:MGI Symbol;Acc:MGI:1328350]	16.8842	12.0313	14.1111	1.91661	0.462874	4.14066	3.46303e-05	0.000797952				0.473	0.149	0.241	1.177	0.563	1.095	0.652		0.287667	0.87175	3.03042	1.59952
ENSMUSG00000031616	Ednra	endothelin receptor type A [Source:MGI Symbol;Acc:MGI:105923]	50.9872	33.7348	41.1287	1.37836	0.367672	3.74887	0.000177632	0.00291483				0.354	0.442	0.467	1.237	0.745	0.645	0.852		0.421	0.86975	2.06591	1.04678
ENSMUSG00000062960	Kdr	kinase insert domain protein receptor [Source:MGI Symbol;Acc:MGI:96683]	35.018	25.0275	29.3091	1.503	0.410665	3.65992	0.000252299	0.00381436				0.281	0.036	0.044	1.292	0.863	0.683	0.631		0.120333	0.86725	7.20706	2.84941
ENSMUSG00000048827	Pkd1l3	polycystic kidney disease 1 like 3 [Source:MGI Symbol;Acc:MGI:2664670]	39.6871	40.5818	40.1984	1.199	0.363324	3.30007	0.000966602	0.00990568				0.064	0.072	0.265	0.915	0.685	1.265	0.584		0.133667	0.86225	6.45075	2.68947
ENSMUSG00000061723	Tnnt3	troponin T3, skeletal, fast [Source:MGI Symbol;Acc:MGI:109550]	12.6638	6.78736	9.30583	1.57011	0.470247	3.3389	0.000841096	0.00904724				0.05	0.06	0.26	0.758	0.48	0.973	1.228		0.123333	0.85975	6.97095	2.80135
ENSMUSG00000029843	Slc13a4	solute carrier family 13 (sodium/sulfate symporters), member 4 [Source:MGI Symbol;Acc:MGI:2442367]	23.0477	24.2907	23.758	1.5645	0.448711	3.48666	0.000489093	0.00611458				0.151	0.17	0.125	1.268	0.863	0.438	0.857		0.148667	0.8565	5.76121	2.52637
ENSMUSG00000045672	Col27a1	collagen, type XXVII, alpha 1 [Source:MGI Symbol;Acc:MGI:2672118]	90.0916	60.5632	73.2182	1.59699	0.314353	5.08024	3.76951e-07	1.80173e-05				0.196	0.132	0.316	0.993	0.674	0.797	0.939		0.214667	0.85075	3.96312	1.98664
ENSMUSG00000022149	C9	complement component 9 [Source:MGI Symbol;Acc:MGI:1098282]	43.3893	20.0065	30.0277	1.58018	0.436488	3.62021	0.00029437	0.00428699				0.603	0.249	0.534	1.258	0.724	0.602	0.8		0.462	0.846	1.83117	0.872765
ENSMUSG00000028943	Espn	espin [Source:MGI Symbol;Acc:MGI:1861630]	24.4881	12.9092	17.8716	1.59983	0.444698	3.59756	0.000321214	0.00458129				0.217	0.106	0.088	0.859	0.632	0.951	0.931		0.137	0.84325	6.15511	2.62178
ENSMUSG00000015354	Pcolce2	procollagen C-endopeptidase enhancer 2 [Source:MGI Symbol;Acc:MGI:1923727]	49.3378	26.0749	36.0447	1.25972	0.377473	3.33724	0.000846157	0.00907549				0.213	0.211	0.16	1.067	0.482	0.89	0.806		0.194667	0.81125	4.16738	2.05914
ENSMUSG00000070469	Adamtsl3	ADAMTS-like 3 [Source:MGI Symbol;Acc:MGI:3028499]	179.019	175.943	177.261	1.18079	0.23142	5.10238	3.35406e-07	1.62821e-05				0.188	0.283	0.211	1.414	0.397	0.499	0.874		0.227333	0.796	3.50147	1.80796
ENSMUSG00000026012	Cd28	CD28 antigen [Source:MGI Symbol;Acc:MGI:88327]	37.0886	26.1725	30.8509	1.71587	0.407076	4.21511	2.49659e-05	0.000616684				0.111	0.073	0.034	1.073	0.535	0.702	0.768		0.0726667	0.7695	10.5894	3.40456
ENSMUSG00000052353	Cemip	cell migration inducing protein, hyaluronan binding [Source:MGI Symbol;Acc:MGI:2443629]	104.333	76.5368	88.4496	1.54975	0.288245	5.37652	7.59413e-08	4.47427e-06				0.119	0.157	0.183	0.944	0.488	0.739	0.905		0.153	0.769	5.02614	2.32945
ENSMUSG00000031825	Crispld2	cysteine-rich secretory protein LCCL domain containing 2 [Source:MGI Symbol;Acc:MGI:1926142]	36.7671	31.4532	33.7306	1.363	0.398834	3.41746	0.000632093	0.00733677				0.105	0.058	0.138	0.874	0.762	0.712	0.726		0.100333	0.7685	7.65947	2.93724
ENSMUSG00000032911	Cspg4	chondroitin sulfate proteoglycan 4 [Source:MGI Symbol;Acc:MGI:2153093]	28.0139	8.32246	16.7617	1.61294	0.456472	3.5335	0.0004101	0.00544106				0.065	0.019	0.024	1.234	0.545	0.822	0.45		0.036	0.76275	21.1875	4.40514
ENSMUSG00000034777	Vax2	ventral anterior homeobox 2 [Source:MGI Symbol;Acc:MGI:1346018]	22.1427	4.16787	11.8714	1.80408	0.469432	3.84312	0.000121482	0.00214853				0.069	0.068	0.007	1.022	0.453	0.895	0.678		0.048	0.762	15.875	3.98868
ENSMUSG00000005087	Cd44	CD44 antigen [Source:MGI Symbol;Acc:MGI:88338]	57.2193	40.4323	47.6267	1.30967	0.357947	3.65885	0.000253347	0.00381782				0.057	0.265	0.136	1.068	0.496	0.986	0.472		0.152667	0.7555	4.94869	2.30705
ENSMUSG00000020067	Mypn	myopalladin [Source:MGI Symbol;Acc:MGI:1916052]	48.47	41.6647	44.5813	1.46625	0.374729	3.91282	9.12247e-05	0.00171251				0.077	0.014	0.12	0.913	0.63	0.788	0.687		0.0703333	0.7545	10.7275	3.42324
ENSMUSG00000037681	Esyt3	extended synaptotagmin-like protein 3 [Source:MGI Symbol;Acc:MGI:1098699]	27.2914	20.8863	23.6313	1.53452	0.423743	3.62136	0.000293063	0.00427129				0.086	0.09	0.238	1.143	0.583	0.648	0.636		0.138	0.7525	5.4529	2.44702
ENSMUSG00000018634	Crhr1	corticotropin releasing hormone receptor 1 [Source:MGI Symbol;Acc:MGI:88498]	26.588	14.3905	19.618	1.64438	0.437506	3.75852	0.000170919	0.00283461				0.091	0.081	0.075	0.59	0.274	0.834	1.274		0.0823333	0.743	9.02429	3.17381
ENSMUSG00000026042	Col5a2	collagen, type V, alpha 2 [Source:MGI Symbol;Acc:MGI:88458]	67.0823	65.0551	65.9239	1.26611	0.311651	4.06257	4.85349e-05	0.00104233				0.045	0.1	0	1.009	0.443	0.695	0.818		0.0483333	0.74125	15.3362	3.93887
ENSMUSG00000059481	Plg	plasminogen [Source:MGI Symbol;Acc:MGI:97620]	19.5999	16.0887	17.5935	1.53774	0.446967	3.44038	0.00058089	0.00692351				0.144	0.037	0	1.216	0.408	0.933	0.377		0.0603333	0.7335	12.1575	3.60377
ENSMUSG00000031789	Cngb1	cyclic nucleotide gated channel beta 1 [Source:MGI Symbol;Acc:MGI:2664102]	45.5336	15.155	28.1744	1.51161	0.456764	3.3094	0.000934957	0.00969868				0.015	0.002	0.014	1.077	0.821	0.341	0.669		0.0103333	0.727	70.3548	6.13658
ENSMUSG00000037139	Myom3	myomesin family, member 3 [Source:MGI Symbol;Acc:MGI:2685280]	32.4198	17.0317	23.6266	1.66921	0.430889	3.87388	0.000107118	0.00194428				0.187	0.176	0.198	0.745	0.57	0.834	0.747		0.187	0.724	3.87166	1.95295
ENSMUSG00000026072	Il1r1	interleukin 1 receptor, type I [Source:MGI Symbol;Acc:MGI:96545]	52.2457	30.2942	39.702	1.66108	0.382653	4.34095	1.4187e-05	0.000390224				0.03	0.054	0	0.832	0.594	0.763	0.705		0.028	0.7235	25.8393	4.69149
ENSMUSG00000014361	Mertk	c-mer proto-oncogene tyrosine kinase [Source:MGI Symbol;Acc:MGI:96965]	48.5366	45.8638	47.0093	1.40307	0.350323	4.00506	6.20012e-05	0.0012659				0.284	0.22	0.359	0.751	0.599	0.81	0.725		0.287667	0.72125	2.50724	1.3261
ENSMUSG00000028763	Hspg2	perlecan (heparan sulfate proteoglycan 2) [Source:MGI Symbol;Acc:MGI:96257]	56.7447	33.9133	43.6982	1.53013	0.36512	4.19077	2.78007e-05	0.000669552				0.229	0.111	0.204	0.69	0.771	0.745	0.659		0.181333	0.71625	3.94991	1.98182
ENSMUSG00000054580	Pla2r1	phospholipase A2 receptor 1 [Source:MGI Symbol;Acc:MGI:102468]	69.0998	52.6647	59.7083	1.48141	0.325063	4.55731	5.18123e-06	0.000169148				0.018	0.016	0.039	1.295	0.41	0.678	0.464		0.0243333	0.71175	29.25	4.87036
ENSMUSG00000026971	Itgb6	integrin beta 6 [Source:MGI Symbol;Acc:MGI:96615]	67.5701	46.1041	55.3038	1.22797	0.333838	3.67834	0.000234761	0.00360774				0.084	0.057	0.07	0.99	0.635	0.936	0.258		0.0703333	0.70475	10.0201	3.32483
ENSMUSG00000038156	Spon1	spondin 1, (f-spondin) extracellular matrix protein [Source:MGI Symbol;Acc:MGI:2385287]	124.626	111.769	117.279	1.71268	0.268809	6.37137	1.87344e-10	2.16912e-08				0.123	0.133	0.151	1.016	0.463	0.763	0.501		0.135667	0.68575	5.05467	2.33762
ENSMUSG00000004098	Col5a3	collagen, type V, alpha 3 [Source:MGI Symbol;Acc:MGI:1858212]	18.8812	16.3582	17.4395	1.55583	0.459759	3.38401	0.000714356	0.00801705				0.153	0.071	0.156	0.861	0.526	0.754	0.56		0.126667	0.67525	5.33092	2.41438
ENSMUSG00000038600	Atp6v0a4	ATPase, H+ transporting, lysosomal V0 subunit A4 [Source:MGI Symbol;Acc:MGI:2153480]	39.4786	20.6048	28.6936	1.92533	0.408506	4.7131	2.43981e-06	9.00603e-05				0.095	0.004	0.177	0.781	0.481	0.777	0.611		0.092	0.6625	7.20109	2.84821
ENSMUSG00000019846	Lama4	laminin, alpha 4 [Source:MGI Symbol;Acc:MGI:109321]	68.2111	52.6148	59.2989	1.0756	0.324139	3.31832	0.000905616	0.00948937				0.025	0	0.063	0.696	0.702	0.706	0.535		0.0293333	0.65975	22.4915	4.49131
ENSMUSG00000004415	Col26a1	collagen, type XXVI, alpha 1 [Source:MGI Symbol;Acc:MGI:2155345]	71.3219	34.2214	50.1216	1.88552	0.363551	5.1864	2.14403e-07	1.11952e-05				0.144	0.121	0.11	0.845	0.426	0.816	0.542		0.125	0.65725	5.258	2.39451
ENSMUSG00000055632	Hmcn2	hemicentin 2 [Source:MGI Symbol;Acc:MGI:2677838]	59.1212	44.8551	50.9692	1.8763	0.367719	5.10255	3.35105e-07	1.62821e-05				0.062	0.037	0.173	0.959	0.528	0.678	0.463		0.0906667	0.657	7.24632	2.85725
ENSMUSG00000004872	Pax3	paired box 3 [Source:MGI Symbol;Acc:MGI:97487]	45.5911	26.7961	34.8511	1.27673	0.381668	3.34514	0.000822417	0.00892356				0.021	0.038	0.023	1.691	0.373	0.389	0.111		0.0273333	0.641	23.4512	4.55159
ENSMUSG00000005397	Nid1	nidogen 1 [Source:MGI Symbol;Acc:MGI:97342]	35.3173	15.579	24.0383	1.84182	0.445795	4.13154	3.60345e-05	0.000822179				0.454	0.119	0.13	0.797	0.486	0.66	0.607		0.234333	0.6375	2.72048	1.44386
ENSMUSG00000005947	Itgae	integrin alpha E, epithelial-associated [Source:MGI Symbol;Acc:MGI:1298377]	23.521	15.762	19.0873	1.51542	0.439029	3.45175	0.000556959	0.00669627				0.043	0.054	0.1	0.779	0.449	0.748	0.551		0.0656667	0.63175	9.62056	3.26612
ENSMUSG00000030307	Slc6a11	solute carrier family 6 (neurotransmitter transporter, GABA), member 11 [Source:MGI Symbol;Acc:MGI:95630]	46.3005	36.0652	40.4518	1.49899	0.391507	3.82878	0.000128781	0.00226047				0.187	0.158	0.096	0.82	0.702	0.449	0.509		0.147	0.62	4.21769	2.07645
ENSMUSG00000079465	Col4a3	collagen, type IV, alpha 3 [Source:MGI Symbol;Acc:MGI:104688]	61.7644	35.3428	46.6663	1.28192	0.350314	3.65934	0.000252864	0.00381672				0.027	0	0.03	0.475	0.602	1.315	0.071		0.019	0.61575	32.4079	5.01827
ENSMUSG00000034177	Rnf43	ring finger protein 43 [Source:MGI Symbol;Acc:MGI:2442609]	28.1117	18.4329	22.581	1.85292	0.437051	4.2396	2.23914e-05	0.000567889				0.205	0.048	0.06	0.936	0.285	0.747	0.479		0.104333	0.61175	5.86342	2.55174
ENSMUSG00000018830	Myh11	myosin, heavy polypeptide 11, smooth muscle [Source:MGI Symbol;Acc:MGI:102643]	35.8279	23.8	28.9548	1.80918	0.40674	4.448	8.6673e-06	0.000258922				0.138	0.079	0.102	0.803	0.587	0.69	0.352		0.106333	0.608	5.71787	2.51548
ENSMUSG00000022032	Scara5	scavenger receptor class A, member 5 (putative) [Source:MGI Symbol;Acc:MGI:1918395]	28.7255	29.4078	29.1154	1.95243	0.419147	4.65809	3.19155e-06	0.000112891				0.064	0.05	0.106	0.818	0.334	0.44	0.814		0.0733333	0.6015	8.20227	3.03602
ENSMUSG00000005580	Adcy9	adenylate cyclase 9 [Source:MGI Symbol;Acc:MGI:108450]	49.2356	39.5884	43.7229	1.28718	0.370445	3.47468	0.000511461	0.00628072				0.067	0.084	0.044	0.767	0.251	0.966	0.42		0.065	0.601	9.24615	3.20885
ENSMUSG00000029648	Flt1	FMS-like tyrosine kinase 1 [Source:MGI Symbol;Acc:MGI:95558]	75.8998	27.3615	48.1636	1.79648	0.375247	4.78746	1.68902e-06	6.5594e-05				0.131	0.024	0.174	0.751	0.288	0.741	0.617		0.109667	0.59925	5.46429	2.45003
ENSMUSG00000031461	Myom2	myomesin 2 [Source:MGI Symbol;Acc:MGI:1328358]	25.2528	19.6534	22.0531	1.64704	0.434227	3.79305	0.000148811	0.00253563				0.104	0.098	0.115	0.567	0.44	0.648	0.712		0.105667	0.59175	5.60016	2.48547
ENSMUSG00000034990	Otoa	otoancorin [Source:MGI Symbol;Acc:MGI:2149209]	34.6299	14.9638	23.3921	1.55371	0.425846	3.64852	0.000263758	0.00392401				0.066	0.06	0.11	0.616	0.573	0.596	0.58		0.0786667	0.59125	7.51589	2.90994
ENSMUSG00000030523	Trpm1	transient receptor potential cation channel, subfamily M, member 1 [Source:MGI Symbol;Acc:MGI:1330305]	44.6746	20.3833	30.7939	1.57096	0.436906	3.59566	0.000323573	0.00460086				0.229	0.322	0.28	0.835	0.596	0.38	0.543		0.277	0.5885	2.12455	1.08716
ENSMUSG00000058806	Col13a1	collagen, type XIII, alpha 1 [Source:MGI Symbol;Acc:MGI:1277201]	48.2391	31.5138	38.6818	1.56538	0.371382	4.21501	2.4977e-05	0.000616684				0.057	0.051	0.144	0.662	0.679	0.494	0.509		0.084	0.586	6.97619	2.80244
ENSMUSG00000091345	Col6a5	collagen, type VI, alpha 5 [Source:MGI Symbol;Acc:MGI:3648134]	32.3552	24.499	27.8659	1.58667	0.426958	3.71622	0.000202225	0.0032137				0.264	0.048	0.118	0.572	0.35	0.777	0.644		0.143333	0.58575	4.08663	2.03091
ENSMUSG00000061048	Cdh3	cadherin 3 [Source:MGI Symbol;Acc:MGI:88356]	17.1694	6.72144	11.1991	1.59517	0.468498	3.40486	0.000661968	0.00758903				0.307	0.063	0.064	0.799	0.31	0.479	0.752		0.144667	0.585	4.04378	2.0157
ENSMUSG00000009734	Pou6f2	POU domain, class 6, transcription factor 2 [Source:MGI Symbol;Acc:MGI:2443631]	73.183	66.8167	69.5451	1.73545	0.317663	5.46319	4.67647e-08	2.97523e-06				0.125	0.025	0.061	0.866	0.351	0.941	0.181		0.0703333	0.58475	8.31398	3.05554
ENSMUSG00000032243	Itga11	integrin alpha 11 [Source:MGI Symbol;Acc:MGI:2442114]	27.6759	20.3886	23.5118	1.972	0.427645	4.6113	4.00159e-06	0.000137121				0.044	0	0.098	0.461	0.097	0.969	0.809		0.0473333	0.584	12.338	3.62504
ENSMUSG00000000766	Oprm1	opioid receptor, mu 1 [Source:MGI Symbol;Acc:MGI:97441]	85.419	45.9729	62.8783	1.83849	0.335708	5.47647	4.33904e-08	2.80847e-06				0.108	0.118	0.197	0.672	0.375	0.591	0.688		0.141	0.5815	4.12411	2.04408
ENSMUSG00000030739	Myh14	myosin, heavy polypeptide 14 [Source:MGI Symbol;Acc:MGI:1919210]	17.3679	11.0111	13.7354	1.68594	0.465347	3.62298	0.000291232	0.00425793				0.195	0.161	0.187	0.713	0.52	0.65	0.443		0.181	0.5815	3.21271	1.68379
ENSMUSG00000001870	Ltbp1	latent transforming growth factor beta binding protein 1 [Source:MGI Symbol;Acc:MGI:109151]	84.6569	114.271	101.579	0.980903	0.26885	3.64851	0.000263762	0.00392401				0.122	0.084	0.175	0.773	0.545	0.751	0.244		0.127	0.57825	4.55315	2.18686
ENSMUSG00000066113	Adamtsl1	ADAMTS-like 1 [Source:MGI Symbol;Acc:MGI:1924989]	106.227	80.3428	91.4362	1.19117	0.283515	4.20145	2.65215e-05	0.000647105				0.155	0.086	0.086	0.642	0.492	0.717	0.405		0.109	0.564	5.17431	2.37137
ENSMUSG00000002944	Cd36	CD36 antigen [Source:MGI Symbol;Acc:MGI:107899]	25.6176	16.3379	20.315	1.87835	0.446858	4.20345	2.62874e-05	0.000643921				0.076	0.025	0.289	0.812	0.129	0.613	0.701		0.13	0.56375	4.33654	2.11654
ENSMUSG00000039809	Gabbr2	gamma-aminobutyric acid (GABA) B receptor, 2 [Source:MGI Symbol;Acc:MGI:2386030]	81.287	57.9622	67.9586	1.59158	0.316512	5.0285	4.94323e-07	2.29793e-05				0.062	0.014	0	0.642	0.305	0.741	0.564		0.0253333	0.563	22.2237	4.47403
ENSMUSG00000055737	Ghr	growth hormone receptor [Source:MGI Symbol;Acc:MGI:95708]	71.4652	44.3954	55.9968	1.11888	0.333335	3.35662	0.000789007	0.00862632				0.041	0.061	0.135	0.717	0.283	0.613	0.62		0.079	0.55825	7.06646	2.82099
ENSMUSG00000030607	Acan	aggrecan [Source:MGI Symbol;Acc:MGI:99602]	12.2623	5.64238	8.47947	1.61146	0.469908	3.42932	0.000605097	0.00712546				0.148	0.143	0.319	0.494	0.365	0.656	0.713		0.203333	0.557	2.73934	1.45383
ENSMUSG00000042453	Reln	reelin [Source:MGI Symbol;Acc:MGI:103022]	98.1551	65.975	79.7665	1.04955	0.3152	3.32978	0.000869139	0.0092475				0.01	0.051	0.011	0.893	0.555	0.189	0.573		0.024	0.5525	23.0208	4.52487
ENSMUSG00000026141	Col19a1	collagen, type XIX, alpha 1 [Source:MGI Symbol;Acc:MGI:1095415]	60.8446	35.2037	46.1926	1.6774	0.357387	4.69351	2.68556e-06	9.76733e-05				0.034	0.022	0.196	0.71	0.293	0.585	0.618		0.084	0.5515	6.56548	2.7149
ENSMUSG00000061462	Obscn	obscurin, cytoskeletal calmodulin and titin-interacting RhoGEF [Source:MGI Symbol;Acc:MGI:2681862]	28.9468	12.1571	19.3527	1.50294	0.438233	3.42953	0.000604622	0.00712546				0.087	0.17	0.176	0.711	0.414	0.531	0.532		0.144333	0.547	3.78984	1.92214
ENSMUSG00000029287	Tgfbr3	transforming growth factor, beta receptor III [Source:MGI Symbol;Acc:MGI:104637]	34.2294	15.2186	23.3661	1.74117	0.441772	3.94133	8.10308e-05	0.00156417				0.076	0.031	0	0.845	0.276	0.551	0.509		0.0356667	0.54525	15.2874	3.93427
ENSMUSG00000030513	Pcsk6	proprotein convertase subtilisin/kexin type 6 [Source:MGI Symbol;Acc:MGI:102897]	29.3442	19.2957	23.6022	1.73822	0.425477	4.08535	4.40113e-05	0.000968613				0.06	0.054	0.079	0.374	0.513	0.338	0.907		0.0643333	0.533	8.28497	3.0505
ENSMUSG00000002020	Ltbp2	latent transforming growth factor beta binding protein 2 [Source:MGI Symbol;Acc:MGI:99502]	10.8364	10.3805	10.5759	1.6375	0.471185	3.47528	0.000510318	0.00627496				0.155	0.069	0.061	0.845	0.487	0.532	0.26		0.095	0.531	5.58947	2.48271
ENSMUSG00000005107	Slc2a9	solute carrier family 2 (facilitated glucose transporter), member 9 [Source:MGI Symbol;Acc:MGI:2152844]	20.7804	10.6125	14.9701	1.60558	0.458317	3.5032	0.000459708	0.00584943				0.104	0.07	0.096	0.615	0.58	0.526	0.384		0.09	0.52625	5.84722	2.54775
ENSMUSG00000024421	Lama3	laminin, alpha 3 [Source:MGI Symbol;Acc:MGI:99909]	24.0649	24.8939	24.5386	1.47847	0.419433	3.52494	0.00042358	0.00556054				0.069	0.055	0.128	0.75	0.356	0.175	0.786		0.084	0.51675	6.15179	2.62101
ENSMUSG00000053702	Nebl	nebulette [Source:MGI Symbol;Acc:MGI:1921353]	40.0229	36.9524	38.2683	1.3888	0.378369	3.67049	0.000242081	0.00369888				0.082	0.092	0.147	0.373	0.63	0.608	0.455		0.107	0.5165	4.8271	2.27116
ENSMUSG00000057914	Cacnb2	calcium channel, voltage-dependent, beta 2 subunit [Source:MGI Symbol;Acc:MGI:894644]	36.1308	34.9881	35.4778	1.44836	0.378433	3.82726	0.00012958	0.00227021				0.287	0.162	0.173	0.638	0.468	0.376	0.58		0.207333	0.5155	2.48633	1.31402
ENSMUSG00000026609	Ush2a	Usher syndrome 2A (autosomal recessive, mild) [Source:MGI Symbol;Acc:MGI:1341292]	75.2175	54.8266	63.5656	1.77434	0.32494	5.46052	4.7474e-08	3.01008e-06				0.13	0	0.113	0.612	0.224	0.564	0.654		0.081	0.5135	6.33951	2.66437
ENSMUSG00000066842	Hmcn1	hemicentin 1 [Source:MGI Symbol;Acc:MGI:2685047]	42.1499	33.9034	37.4377	1.28774	0.372204	3.45978	0.000540616	0.00654391				0.069	0	0.063	0.717	0.152	0.584	0.6		0.044	0.51325	11.6648	3.54409
ENSMUSG00000021313	Ryr2	ryanodine receptor 2, cardiac [Source:MGI Symbol;Acc:MGI:99685]	48.9913	36.3498	41.7675	1.19649	0.35969	3.32645	0.000879607	0.00931995				0.044	0	0.082	1.079	0.261	0.398	0.309		0.042	0.51175	12.1845	3.60698
ENSMUSG00000096054	Syne1	spectrin repeat containing, nuclear envelope 1 [Source:MGI Symbol;Acc:MGI:1927152]	49.9149	27.4367	37.0702	1.25464	0.375343	3.34264	0.000829869	0.00896974				0.051	0.043	0.142	0.683	0.352	0.338	0.654		0.0786667	0.50675	6.44174	2.68745
ENSMUSG00000058897	Col25a1	collagen, type XXV, alpha 1 [Source:MGI Symbol;Acc:MGI:1924268]	21.054	18.8574	19.7988	1.59066	0.439195	3.62177	0.000292599	0.00426788				0.105	0.05	0.077	0.533	0.353	0.74	0.401		0.0773333	0.50675	6.5528	2.71211
ENSMUSG00000055471	Alk	anaplastic lymphoma kinase [Source:MGI Symbol;Acc:MGI:103305]	32.1506	30.463	31.1862	1.5329	0.397159	3.85967	0.000113541	0.00203316				0.167	0.033	0.103	0.853	0.332	0.547	0.282		0.101	0.5035	4.98515	2.31764
ENSMUSG00000066392	Nrxn3	neurexin III [Source:MGI Symbol;Acc:MGI:1096389]	91.9903	48.0678	66.8917	1.24085	0.318786	3.89244	9.92403e-05	0.00182897				0.11	0.093	0.164	0.706	0.405	0.557	0.337		0.122333	0.50125	4.09741	2.03471
ENSMUSG00000052613	Pcdh15	protocadherin 15 [Source:MGI Symbol;Acc:MGI:1891428]	72.6706	52.9923	61.4259	1.15661	0.331667	3.48727	0.000487983	0.00611323				0.151	0.101	0.204	0.52	0.343	0.597	0.52		0.152	0.495	3.25658	1.70336
