# Supplementary figures and images for: Extracellular matrix-inducing Sox9 promotes both basal progenitor proliferation and gliogenesis in developing neocortex
Source: eLife journal article supplement (doi:10.7554/elife.49808), 2020-03-19

Figure 4 Supplement 3

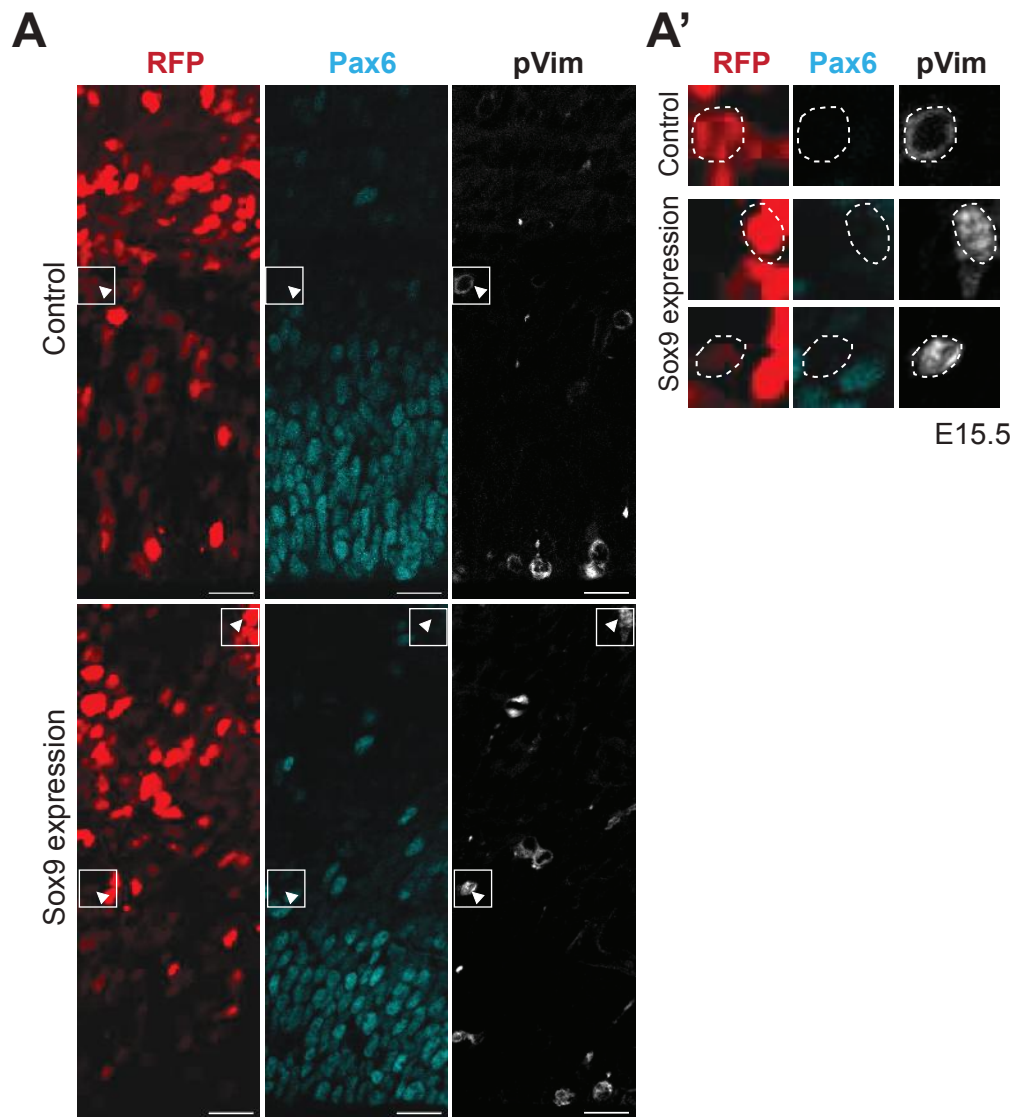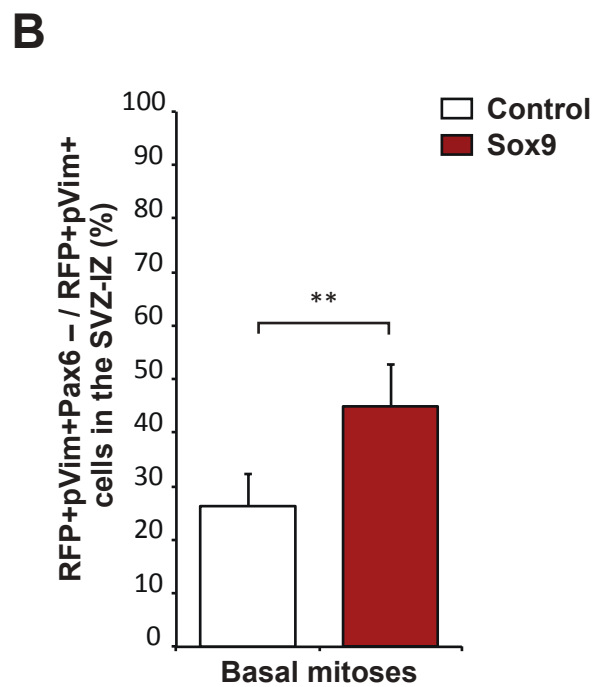

Supplement: supp [file elife-49808-supp-v1.zip]

Figure 5 Supplement 2

**A**

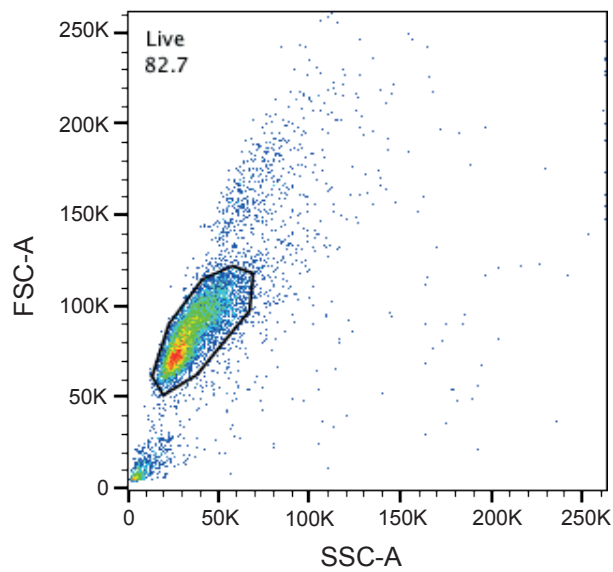

**B**

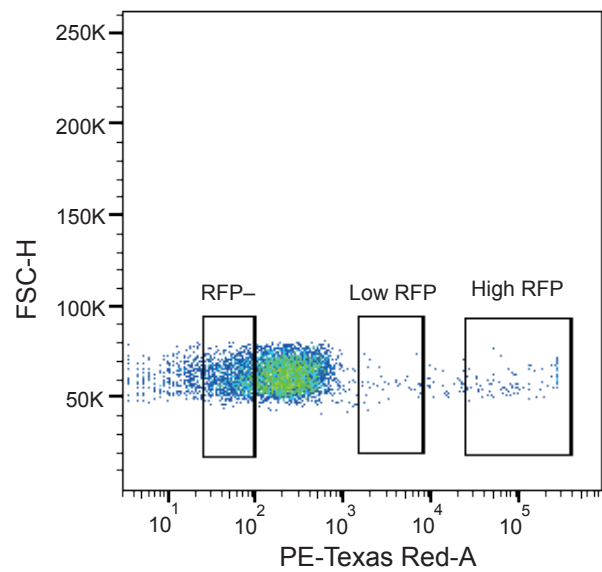

**C**

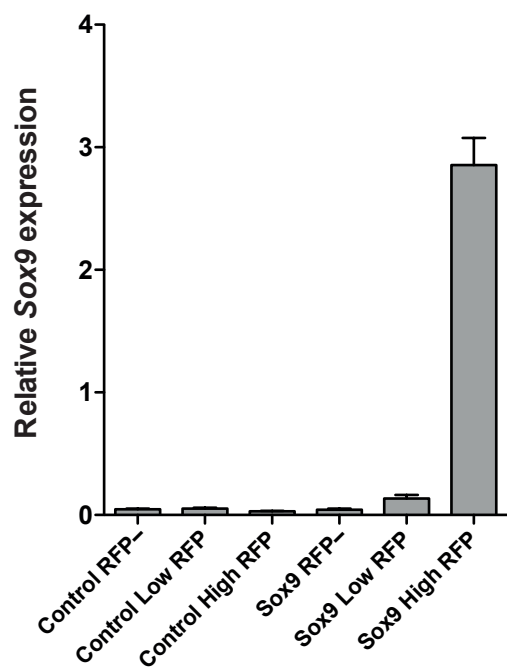

Supplement: supp [file elife-49808-supp-v1.zip]

Figure 3 Supplement 1

**A**

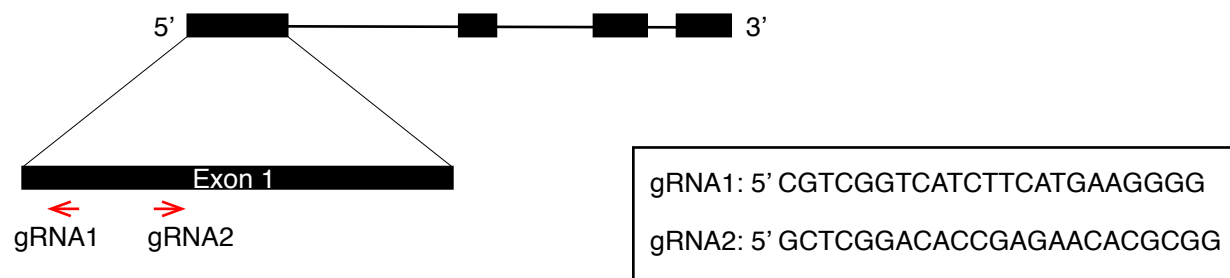

**B**

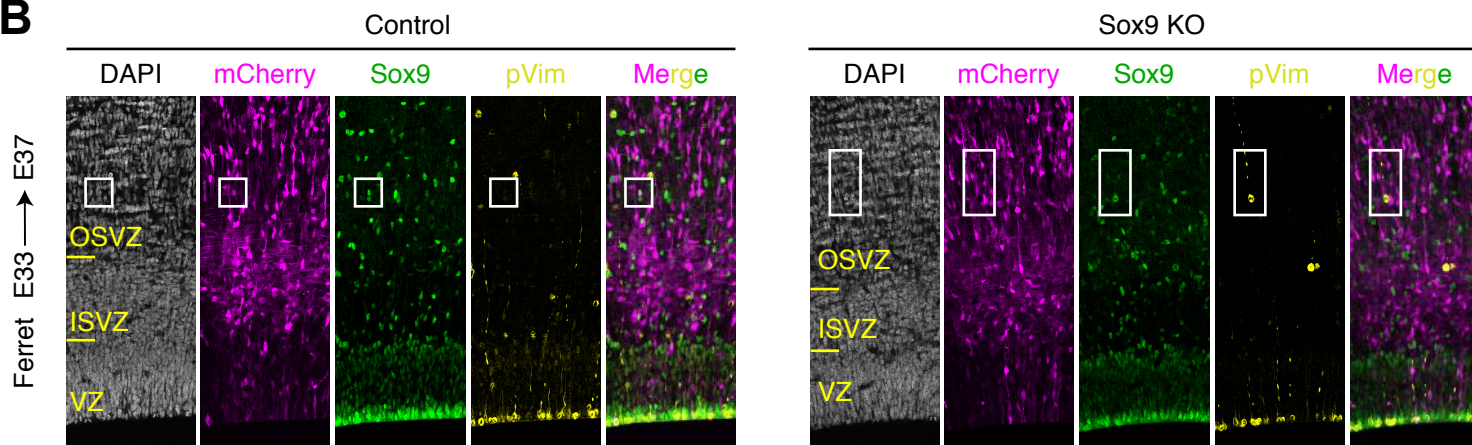

**B'**

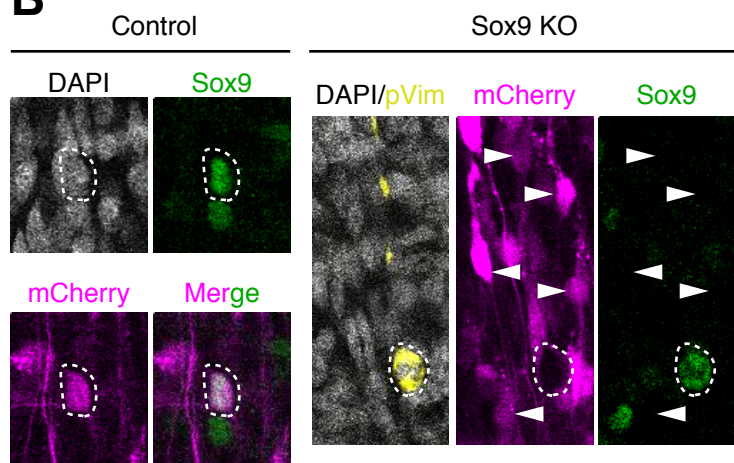

**C**

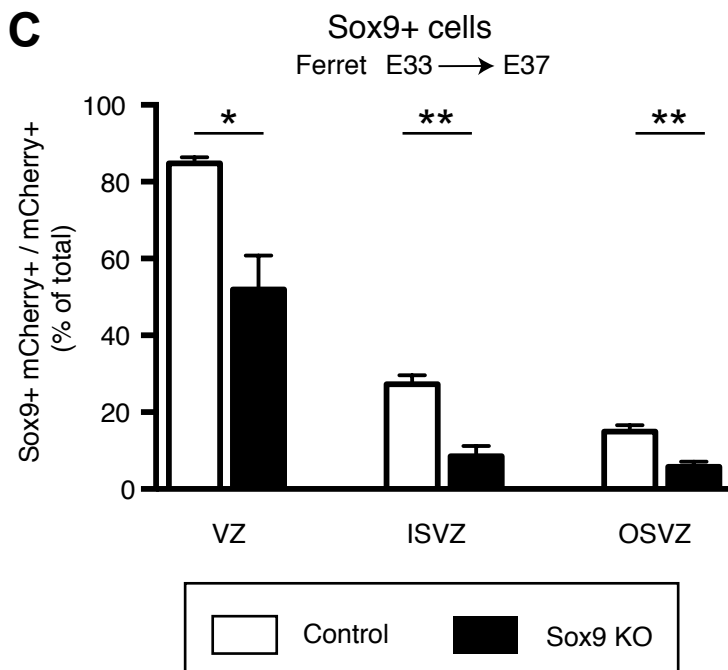

Supplement: supp [file elife-49808-supp-v1.zip]

Figure 6 Supplement 1

A

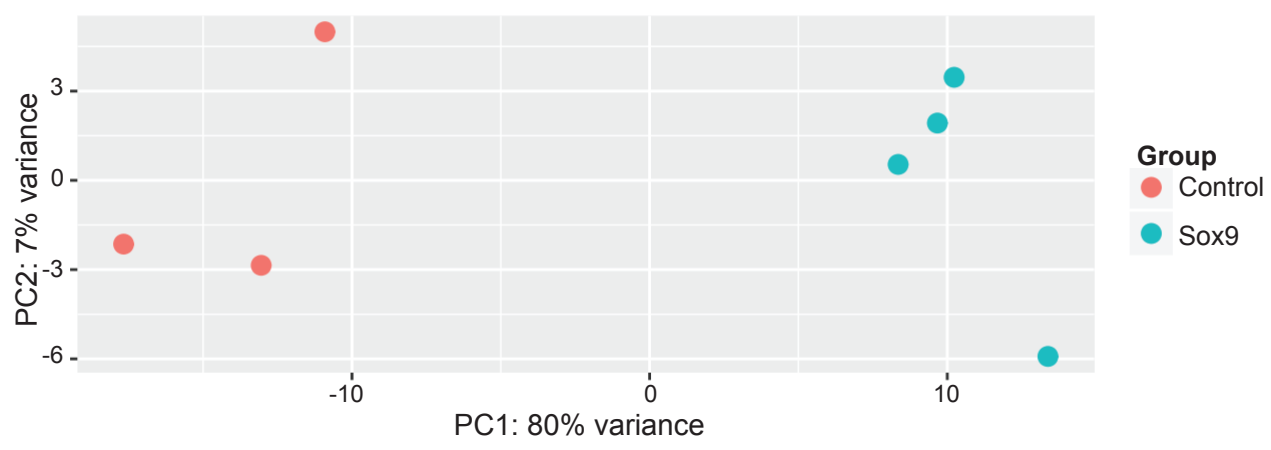

B

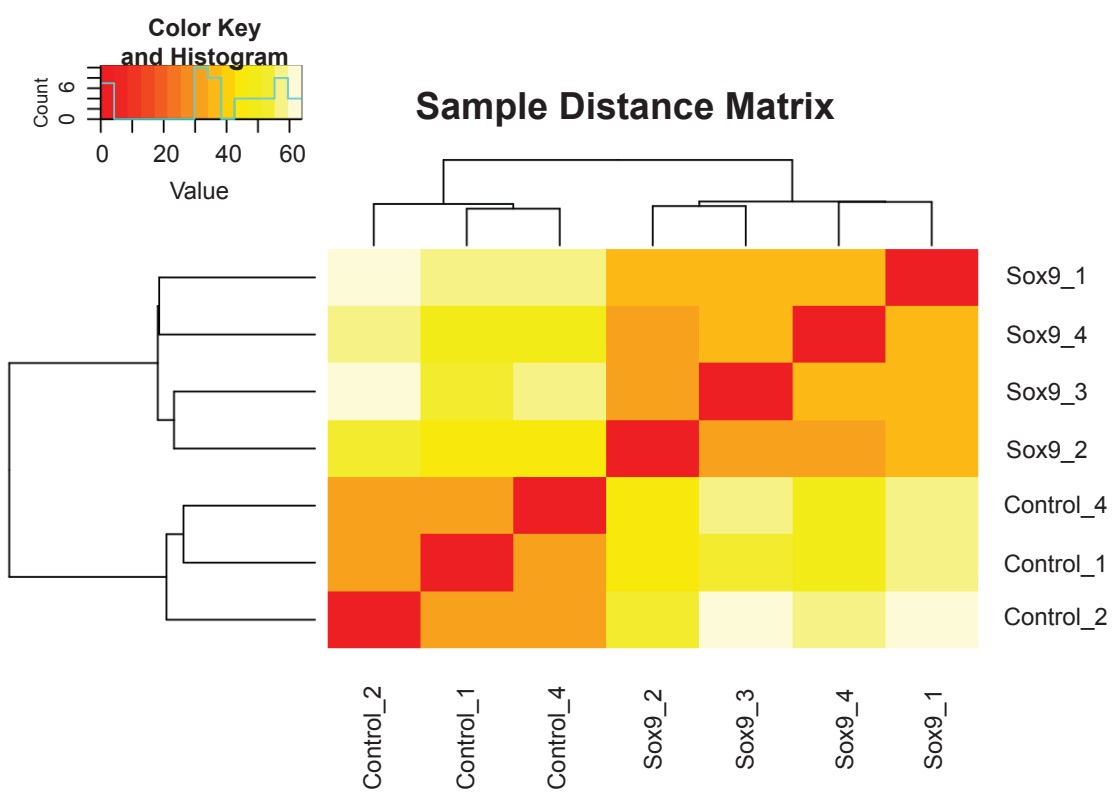

Supplement: supp [file elife-49808-supp-v1.zip]

Figure 3 Supplement 2

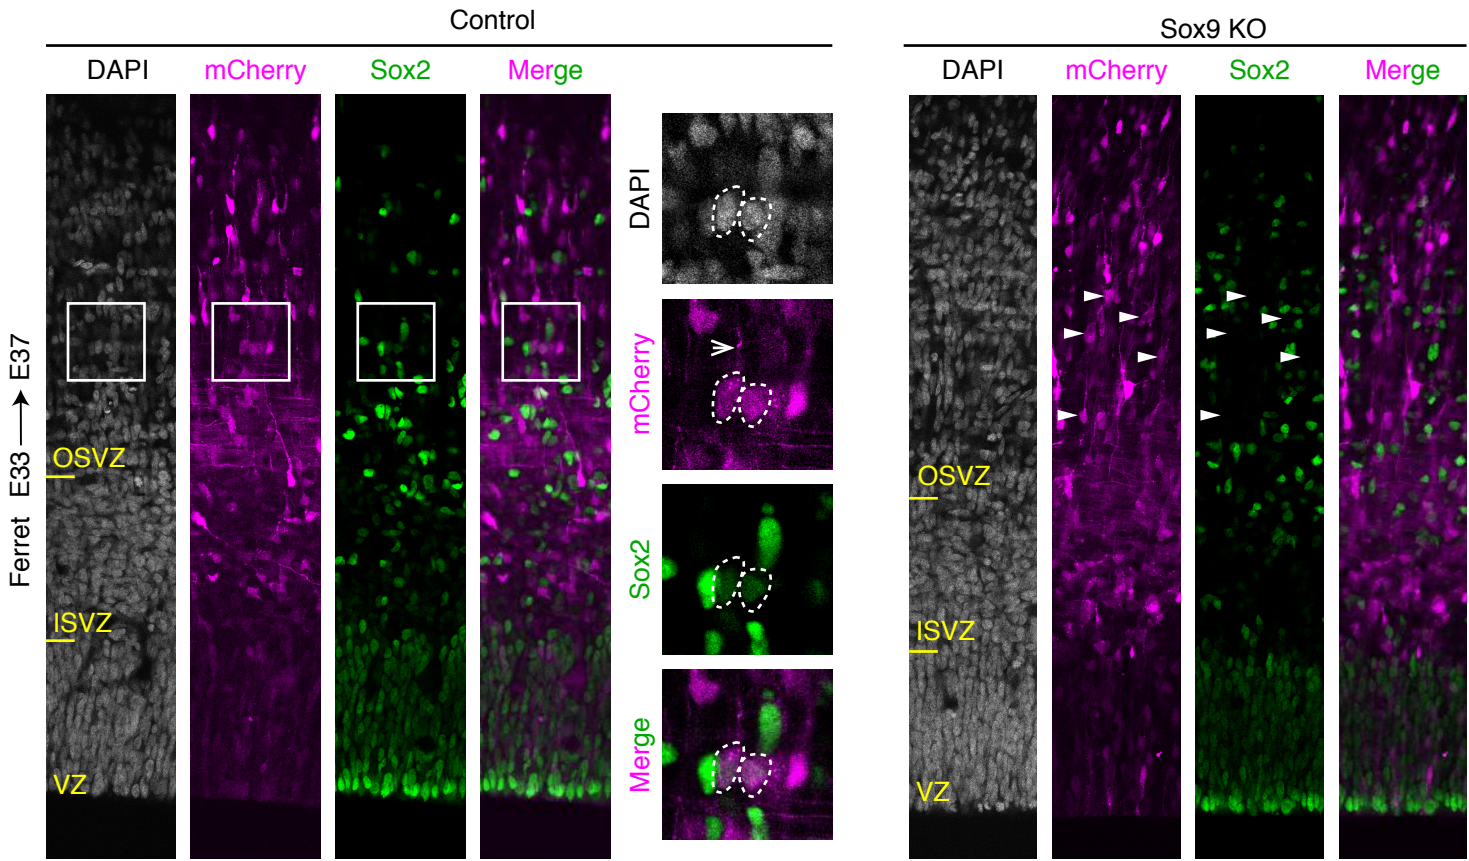

Supplement: supp [file elife-49808-supp-v1.zip]

Figure 5 Supplement 1

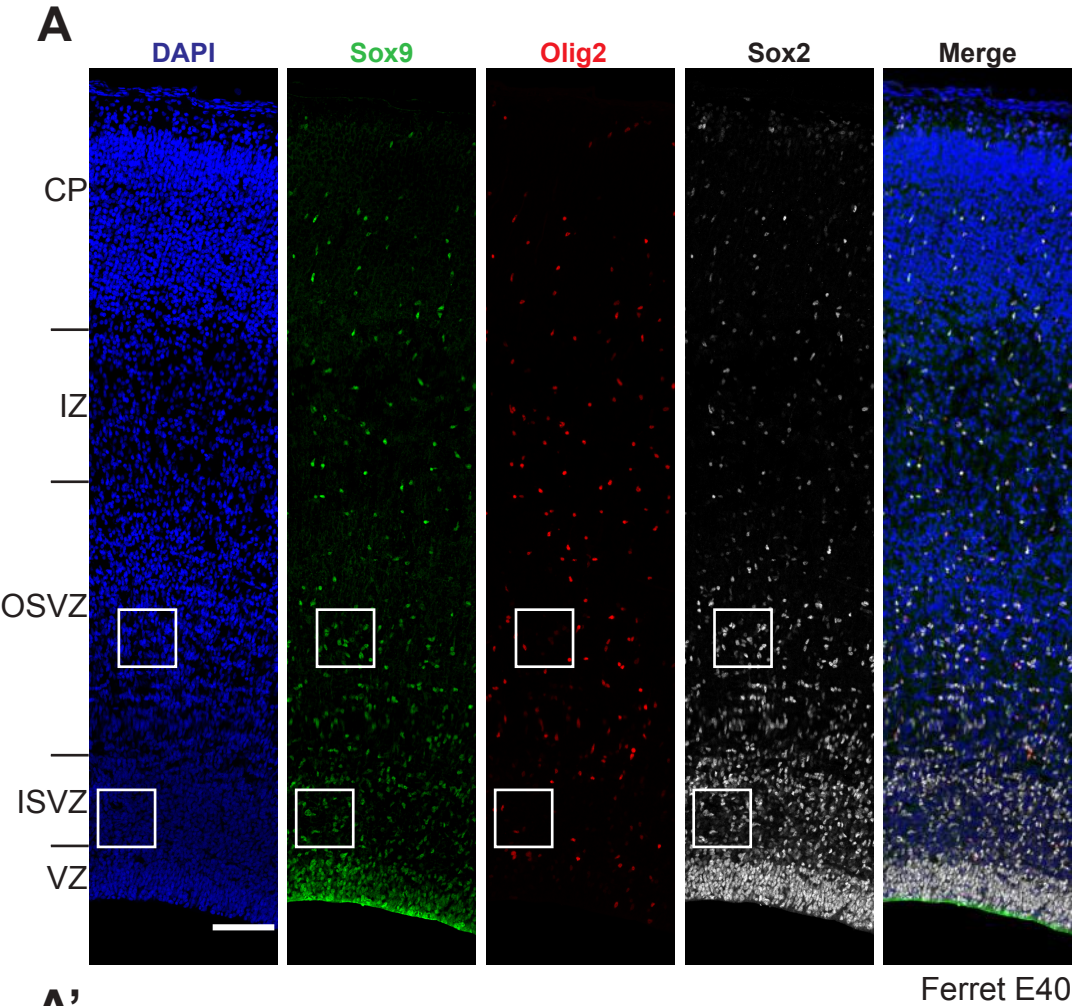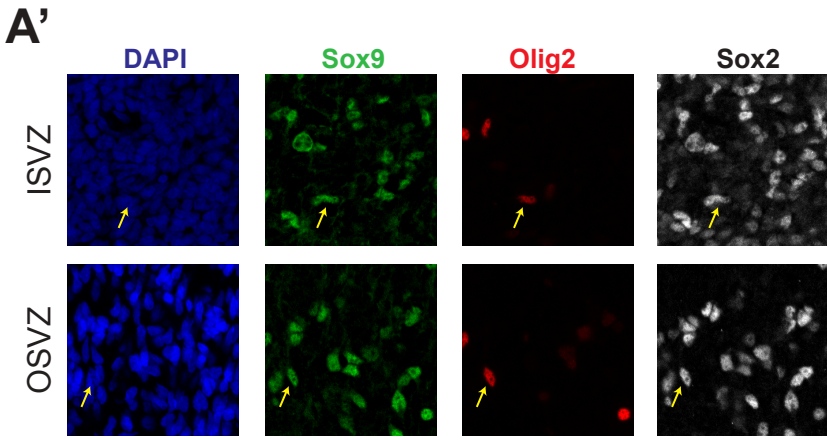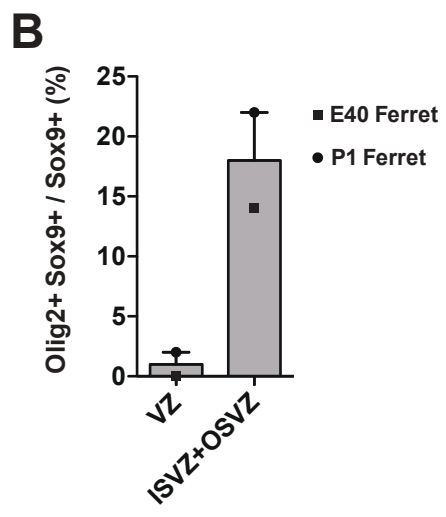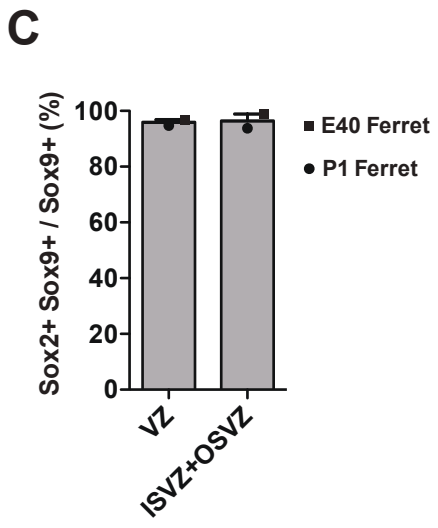

Supplement: supp [file elife-49808-supp-v1.zip]

Figure 1 Supplement 1

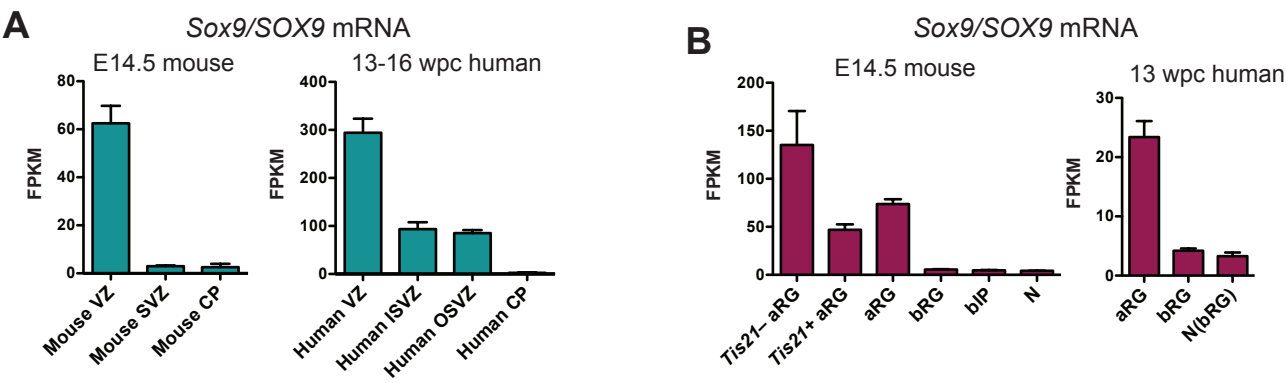

Supplement: supp [file elife-49808-supp-v1.zip]

Figure 7 Supplement 1

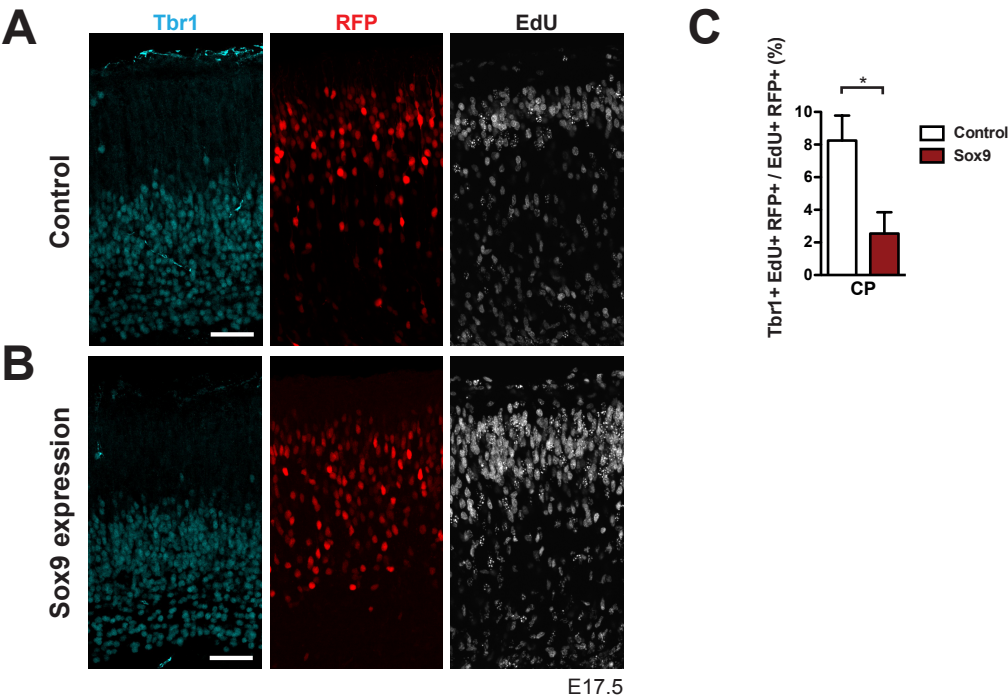

Supplement: supp [file elife-49808-supp-v1.zip]

Figure 6 Supplement 2

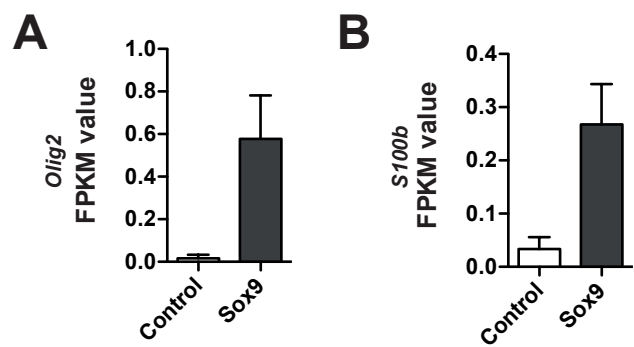

Supplement: supp [file elife-49808-supp-v1.zip]

Figure 4 Supplement 1

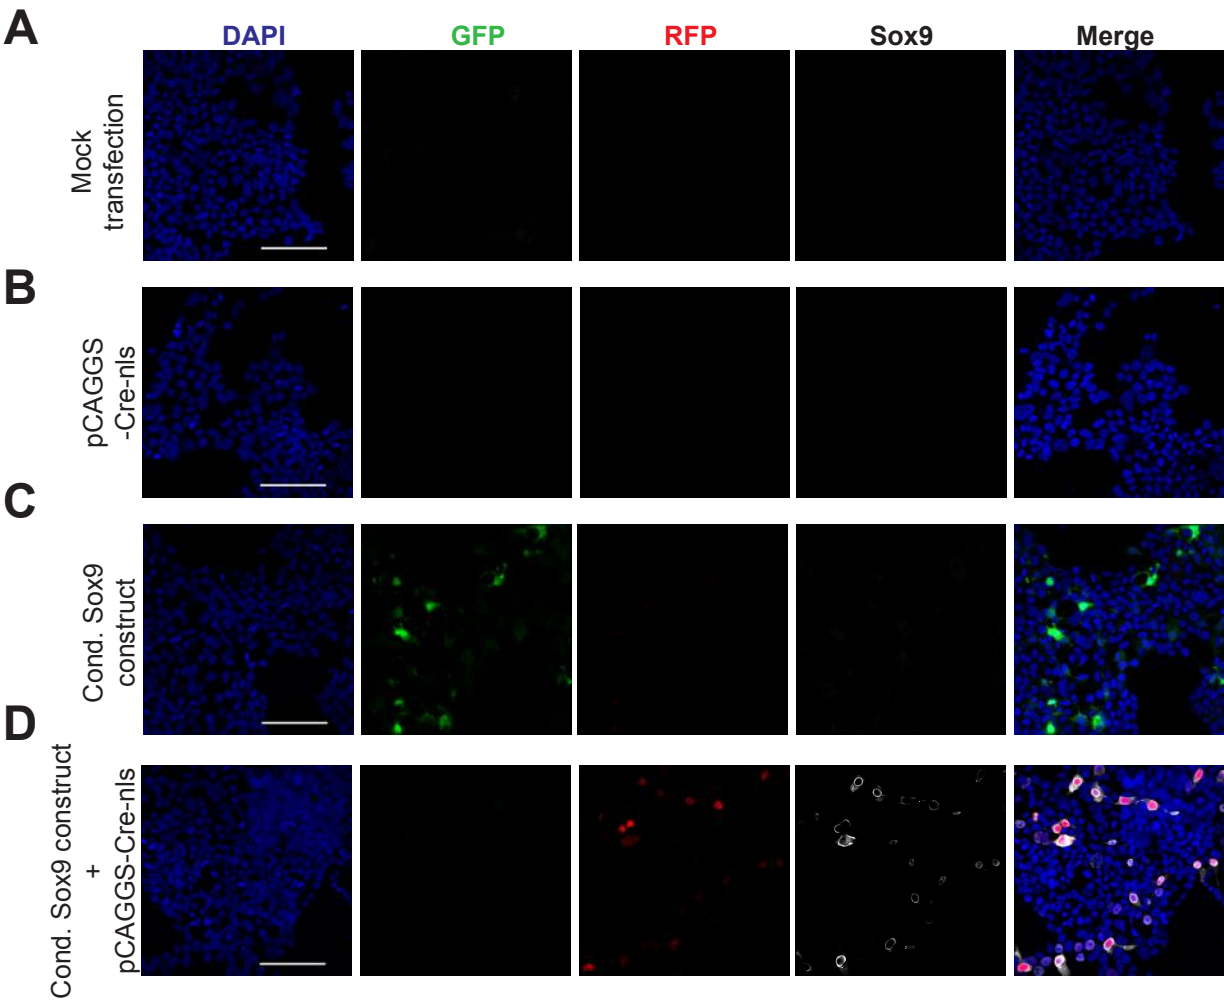

Supplement: supp [file elife-49808-supp-v1.zip]

Figure 4 Supplement 2

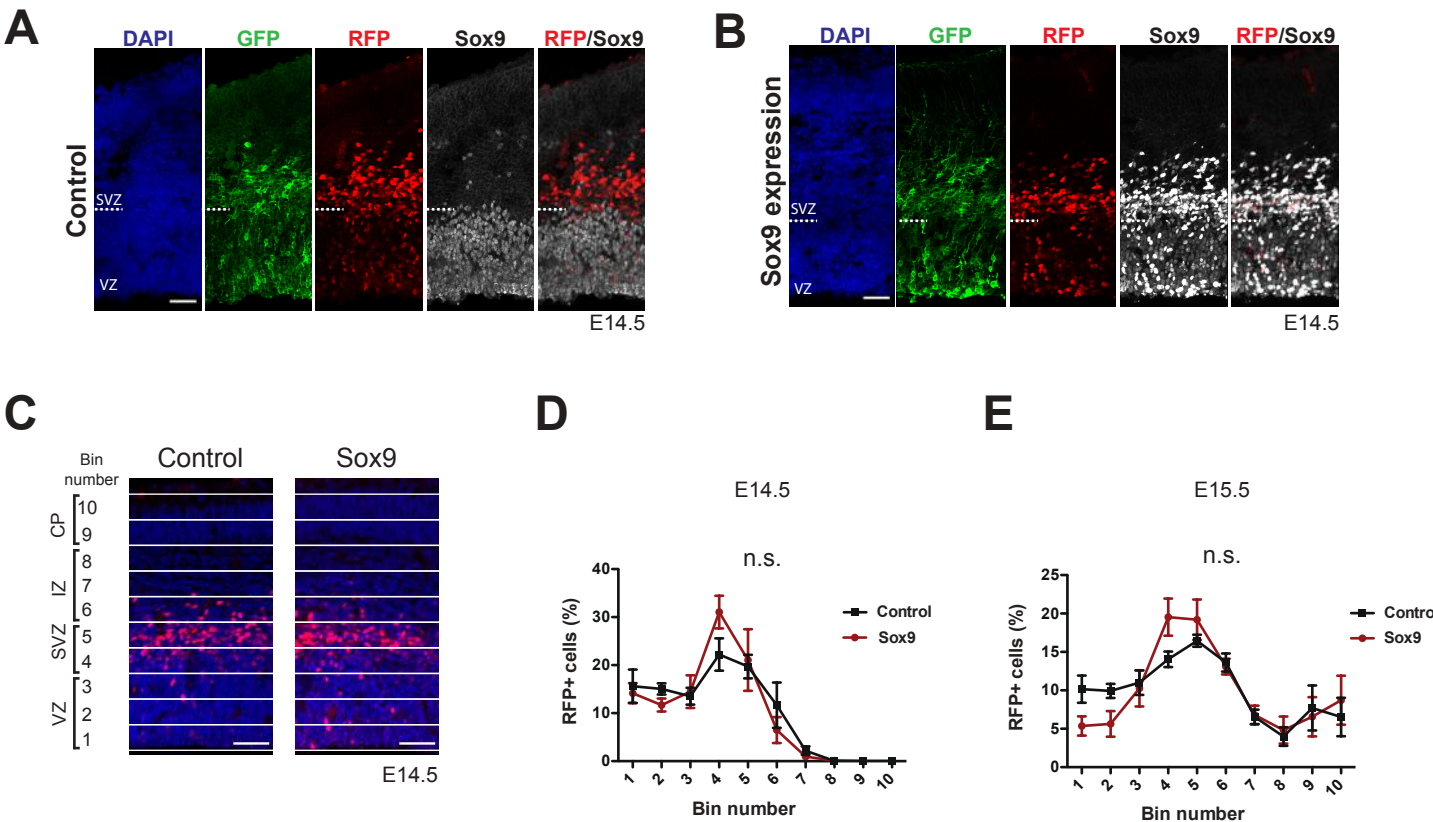

Supplement: supp [file elife-49808-supp-v1.zip]
